# Supplementary material for: A rapid aureochrome opto-switch enables diatom acclimation to dynamic light
Source: Nat Commun. 2024 Jul 3;15:5578. doi: 10.1038/s41467-024-49991-7 (PMC11219949; doi:10.1038/s41467-024-49991-7)
Supplement: Supplementary file 4 — Supplementary Data 1-9 [file 41467_2024_49991_MOESM4_ESM.xlsx]

## Sheet: 1. Primers
Supplementary Data 1. Sequences of oligonucleotide primers used in this study.
	Sequences are shown from 5' to 3'.
	CRISPR sgRNA template generation
LHCX2 knockout	HZ-1325	tcgagAGATGGAAGGAATCTGGTTG
LHCX2 knockout	HZ-1326	aaacCAACCAGATTCCTTCCATCTc
LHCX3 knockout	HZ-1257	tcgagTTCGCGGTATCGCTTCAGGG
LHCX3 knockout	HZ-1258	aaacCCCTGAAGCGATACCGCGAAc
AUREO1a knockout	HZ-189	tcgagTGTCGCTTTCGAAGCCATGG
AUREO1a knockout	HZ-190	aaacCCATGGCTTCGAAAGCGACAc
AUREO1b knockout	HZ-193	tcgaGAGCTCGTGTAGGCGTTCAA
AUREO1b knockout	HZ-194	aaacTTGAACGCCTACACGAGCTC
AUREO1c knockout	HZ-197	tcgagTTTGGACGGGACCGGCAATA
AUREO1c knockout	HZ-198	aaacTATTGCCGGTCCCGTCCAAAc
	Mutant genotyping PCR and sequencing
LHCX2 mutant genotyping PCR and sequencing	HZ-1405	CGTACACCATGAAATTATCC	Sequencing primer
LHCX2 mutant genotyping PCR and sequencing	HZ-1406	GTCTAGCCAAAGAAAACGAG
LHCX3 mutant genotyping PCR and sequencing	HZ-1311	GCAACCCACGTACCACCACC	Sequencing primer
LHCX3 mutant genotyping PCR and sequencing	HZ-1312	TCCTGCGCCATGAATCCAGC
AUREO1a mutant genotyping PCR and sequencing	HZ-267	GTCATGTTCACGCCTGACG	Sequencing primer
AUREO1a mutant genotyping PCR and sequencing	HZ-268	CGCAAGGCAGCAATGAAG
AUREO1b mutant genotyping PCR and sequencing	HZ-353	ATGCGCACATTCGTTCGCTT	Sequencing primer
AUREO1b mutant genotyping PCR and sequencing	HZ-354	TGCACGTGTAGTAGCTGTTG
AUREO1c mutant genotyping PCR and sequencing	HZ-271	GCAATATGGATTCGGATCC	Sequencing primer
AUREO1c mutant genotyping PCR and sequencing	HZ-272	ACTACTAGTAGTGGTCACG
	Mutant single-nucleotide polymorphism (SNP) PCR and sequencing
AUREO1a SNP PCR	HZ-2029	TCCCATACCAGCACACCAAG
AUREO1a SNP PCR	HZ-2030	CTCACTATCAATGGGTATCG
AUREO1a SNP sequencing	AUREO1a-F1	GCAAGCCTGCCTTGACTA
AUREO1b SNP PCR	HZ-353	ATGCGCACATTCGTTCGCTT
AUREO1b SNP PCR	HZ-354	TGCACGTGTAGTAGCTGTTG
AUREO1b SNP sequencing	HZ-353	ATGCGCACATTCGTTCGCTT
AUREO1c SNP PCR	HZ-2031	CTGGAAGATCCATCGAAGC
AUREO1c SNP PCR	HZ-2032	CGGTAACGTATTGGCGACAC
AUREO1c SNP sequencing	AUREO1c-F3	TAAGGCTTCAACGTTGCGT
LHCX2 SNP PCR	HZ-2033	CTTTCAGCAACAGAACGAAAC
LHCX2 SNP PCR	HZ-2034	TGTCCATGTTGAGTGAATC
LHCX2 SNP sequencing	LHCX2-5-R1	TGGGGTCCAATGATTCTCG
	Cloning of AUREO1c for complementation of aureo1c-1 to obtain COMP1
	HZ-797	actgagagtgcaccatatgCGAAACGAATAGAAGCTCCCCG
	HZ-798	cttgttgcccgtgccgtCTAAGCTGTCCCCGTCGAAA
	HZ-799	ggggacagcttagacggCACGGGCAACAAGGATTTGA
	HZ-800	ttatatgttagttacgtaTTCTAAATTCGTGTTTCCGCAG
	Production of recombinant AUREO1c protein from E. coli
Cloning of AUREO1c into pET28a	HZ-1043	agcaaatgggtcgcGCGGACCAAGCCAAGGCCAATC
Cloning of AUREO1c into pET28a	HZ-1044	tcgagtgcggccgcTCAACTACTAGTAGTGGTCACG
Cloning of AUREO1c into pGEX-4T-1	HZ-1387	atctggttccgcgtggatccGCGGACCAAGCCAAGGCCAATC
Cloning of AUREO1c into pGEX-4T-1	HZ-1388	tcgagtcgacccgggaattcTCAACTACTAGTAGTGGTCACG
	RT-qPCR
RT-qPCR primer of RPS	HZ-95	CGAAGTCAACCAGGAAACCAA
RT-qPCR primer of RPS	HZ-96	GTGCAAGAGACCGGACATACC
RT-qPCR primer of LHCX2	HZ-1381	CGGGACCATGAAGCGTTAC
RT-qPCR primer of LHCX2	HZ-1382	TGCGAGTCAAAGAGAAACGAC
RT-qPCR primer of LHCX3	HZ-311	CGCTCCCGTTGGTATCTTTG
RT-qPCR primer of LHCX3	HZ-312	AAGATCCTTCCACGGCTTCA
RT-qPCR primer of C.reinhardtii RACK1	HZ-1575	CAAGTACACCATTGGCGAGC
RT-qPCR primer of C.reinhardtii RACK1	HZ-1576	CTTGCAGTTGGTCAGGTTCC
RT-qPCR primer of C.reinhardtii LHCSR3.1	HZ-1581	TGCCAGTCTGTGCATAGGAG
RT-qPCR primer of C.reinhardtii LHCSR3.1	HZ-1582	CCGAACAACCTTTCGACTGT
RT-qPCR primer of C.reinhardtii LHCSR3.2	HZ-1583	GCAGGCGTTGTGTGGTGCCC
RT-qPCR primer of C.reinhardtii LHCSR3.2	HZ-1584	TCGCCTGTTGTCACCATCTT
	DAP-Seq assay
Y adaptor formation	HZ-1795	ACACTCTTTCCCTACACGACGCTCTTCCGATCT
Y adaptor formation	HZ-1796	pGATCGGAAGAGCACACGTCTGAACTCCAGTCAC
Library construction	HZ-1797	AATGATACGGCGACCACCGAGATCTACACTATCCTCTACACTCTTTCCCTACACGACGCTCTTCCGATCT
Library construction	HZ-1799	AATGATACGGCGACCACCGAGATCTACACAGAGTAGAACACTCTTTCCCTACACGACGCTCTTCCGATCT
Library construction	HZ-1800	CAAGCAGAAGACGGCATACGAGATCGTACTAGGTGACTGGAGTTCAGACGTGTGCTCTTCCG
	p indicate phosphorylation modification at the 5' end
	Electrophoretic mobility shift assay
primer of LHCX2 for EMSA	HZ-1629	CTAACCTGTAATACTAACGTG
primer of LHCX2 for EMSA	HZ-1630	TGTACGTAGTGGGCTGGAAT
biotinylated primer of LHCX2 for EMSA	HZ-1630	*TGTACGTAGTGGGCTGGAAT
primer of LHCX3 for EMSA	HZ-1627	CAATTAGTGCTGACTAACAGC
primer of LHCX3 for EMSA	HZ-1628	GGTGTAATGATTGTGTTTGG
biotinylated primer of LHCX3 for EMSA	HZ-1628	*GGTGTAATGATTGTGTTTGG
primer of 𝛼 tubulin for EMSA	HZ-1743	CGGCAATCAGCAAAATAAGC
primer of 𝛼 tubulin for EMSA	HZ-1744	GATAGAAGAACGAGAGCTTC
	* indicate biotinylation modification at the 5' end
	LHCX2 gene model determination
	HZ-1829	CGATGCTTGGAGCATCGTAG
	HZ-1830	CGTGAGTAACTTCCGCTTCC
	HZ-1831	GGCATTGGTGCTTCCGAAGT
	HZ-1832	GGATCGATTTGAGAGCCTGA

## Sheet: 2. Light intensity and quality
Supplementary Data 2. Light intensity and quality for each experiment.
	Figures	measurement	light quality and light intensity (PAR, μmol m-2 s-1)	duration of treatment	PUR (μmol m-2 s-1)
Chamber 1	——	growth light	white: 40	——	26
	Fig. 1c, g	Fv/Fm	white: 550	3 d	362
	Fig. 1e	RT-qPCR	white: 550	1 h	362
	Fig. 2a	subcellular localization	white: 550	6 h	362
	Supplementary Fig. 3c	Fv/Fm	white: 550	3 d	362
	Supplementary Fig. 10	RT-qPCR	white: 550	1 h	362
	Supplementary Fig. 12	RT-qPCR	white: 80, 160, 320, 640	15 min	53, 105, 211, 422
	Supplementary Fig. 13	RT-qPCR	white: 40 and 550	10 min	26 and 362
	Supplementary Fig. 18	RT-qPCR	white: 40	——	26
	Figures	measurement	light quality and light intensity (PAR, μmol m-2 s-1)	duration of treatment	PUR (μmol m-2 s-1)
Chamber 2	Fig. 1b	bleaching phenotype	white: 1200	2 d	794
	Fig. 1f	bleaching phenotype	white: 1200	2 d	794
	Fig. 1d	NPQ	white: 900	6 h	596
	Supplementary Fig. 3a	bleaching phenotype	white: 1200	2 d	794
	Supplementary Fig. 3b	NPQ	white: 900	6 h	596
	Supplementary Fig. 7	cell number and chlorophyll fluorescence	white: 1200	1 d	794
	Supplementary Fig. 8	Fv/Fm	white: 1200	1, 2, 3, 4, 6 h	794
	Supplementary Fig. 9	NPQ	white: 1200	4 h	794
	Figures	measurement	light quality and light intensity (PAR, μmol m-2 s-1)	duration of treatment	PUR (μmol m-2 s-1)	Blue light component of PAR (400-500 nm) (μmol m-2 s-1)
Chamber 3	Fig. 2b-d; Fig. 3a-d	RNA-seq HWL samples	white: 430	1 h	301	149
	Fig. 2b-d; Fig. 3a-d	RNA-seq HRL samples	red: 440	1 h	241	0
	Fig. 2b-d; Fig. 3a-d	RNA-seq HBL1 samples	blue: 260	1 h	247	260
	Fig. 2b-d; Fig. 3a-d	RNA-seq HBL2 samples	blue: 430	1 h	408	430
	Fig. 4a	RT- qPCR	blue: 260	Time series	247
	Supplementary Fig. 14	RT- qPCR	blue: 5, 10, 20, 40, 80	15 min	5, 10, 19, 38, 76
	Supplementary Fig. 17	RT- qPCR	blue: 260	Time series	247
	Figures	measurement	light quality and light intensity (PAR, μmol m-2 s-1)	duration of treatment	PUR (μmol m-2 s-1)
Chamber 4	Fig. 4c	RT-qPCR	white: 40 and 550	30 min, 1 h, 2 h	26 and 353 for P. tricornutum
	Fig. 4d	TMT proteomics	white: 40 and 550	2 h	26 and 353 for P. tricornutum
	Fig. 4c	RT-qPCR	white: 40 and 550	30 min, 1 h, 2 h	28 and 385 for C. reinhardtii
	Fig. 4d	TMT proteomics	white: 40 and 550	2 h	28 and 385 for C. reinhardtii
	Fig. 4e	NPQ	white: 40 and 550	2 h	26 and 353 for P. tricornutum; 28 and 385 for C. reinhardtii
	Fig. 4f, g	Fv/Fm	white: 40 and 550	5 d	26 and 353 for P. tricornutum
	Supplementary Fig. 19	RT-qPCR	white: 40 and 550	30 min, 1 h, 2 h	28 and 385 for C. reinhardtii
	Supplementary Fig. 20	RT-qPCR	white: 550	Time series	385 for C. reinhardtii
	Supplementary Fig. 21	TMT proteomics	white: 40 and 550	2 h	28 and 385 for C. reinhardtii

## Sheet: 3. RNA-seq-Raw data
Supplementary Data 3. Raw read counts of genes in the RNA-Seq of P. tricornutum wild type and the aureo1c-1 mutant under various light conditions.
NCBI SRA Accession number	SAMN34393917	SAMN34393918	SAMN34393919	SAMN34393932	SAMN34393933	SAMN34393934	SAMN34393911	SAMN34393912	SAMN34393913	SAMN34393926	SAMN34393927	SAMN34393928	SAMN34393914	SAMN34393915	SAMN34393916	SAMN34393929	SAMN34393930	SAMN34393931	SAMN34393905	SAMN34393906	SAMN34393907	SAMN34393920	SAMN34393921	SAMN34393922	SAMN34393908	SAMN34393909	SAMN34393910	SAMN34393923	SAMN34393924	SAMN34393925
Gene ID	WT-GL-1	WT-GL-2	WT-GL-3	aureo1c-1-GL-1	aureo1c-1-GL-2	aureo1c-1-GL-3	WT-HRL-1	WT-HRL-2	WT-HRL-3	aureo1c-1-HRL-1	aureo1c-1-HRL-2	aureo1c-1-HRL-3	WT-HWL-1	WT-HWL-2	WT-HWL-3	aureo1c-1-HWL-1	aureo1c-1-HWL-2	aureo1c-1-HWL-3	WT-HBL1-1	WT-HBL1-2	WT-HBL1-3	aureo1c-1-HBL1-1	aureo1c-1-HBL1-2	aureo1c-1-HBL1-3	WT-HBL2-1	WT-HBL2-2	WT-HBL2-3	aureo1c-1-HBL2-1	aureo1c-1-HBL2-2	aureo1c-1-HBL2-3	Annotation	Gene name
Phatr3_J31400	0	5	0	15	5	2	1	3	0	1	3	1	1	0	0	4	0	6	0	1	7	9	3	0	5	3	0	0	1	1	NA
Phatr3_J42422	98	78	58	135	79	96	93	75	49	68	70	28	40	38	19	19	10	32	17	24	23	24	15	26	20	26	28	11	12	7	Predicted protein
Phatr3_J31402	0	0	0	0	0	0	0	0	0	0	0	0	0	0	0	0	0	0	0	0	0	0	0	0	0	0	0	0	0	0	Predicted protein
Phatr3_J42423	49	40	15	31	25	24	44	28	33	57	36	19	42	38	19	25	26	16	39	52	60	66	44	54	55	51	40	36	41	41	Predicted protein	DSCYC9
Phatr3_J42424	728	622	283	720	549	635	550	531	504	615	576	262	455	430	402	392	303	314	464	421	368	371	333	354	501	441	405	309	310	309	Predicted protein
Phatr3_J7430	193	197	32	209	180	211	182	183	184	257	209	88	119	188	182	126	126	151	169	144	132	185	172	177	271	152	141	147	146	157	NA
Phatr3_J42426	2304	1864	778	1787	1537	1708	4206	4364	3665	3880	3558	1730	2476	3266	3067	2830	2582	2965	1258	1316	1311	1436	1482	1525	1495	1294	1362	1450	1346	1400	Predicted protein
Phatr3_EG02408	1250	1104	711	996	1161	1035	136	190	133	293	216	144	3043	3484	3201	3929	3596	3636	1756	2013	2032	2424	2199	2145	2870	2302	2390	2279	2485	2548	Predicted protein
Phatr3_J31409	2694	2333	2393	2167	2225	2029	172	124	254	313	329	202	3073	2855	2941	4607	4508	4514	1876	1927	1971	3930	3485	3214	1444	1356	1315	3273	3905	3774	Predicted protein
Phatr3_J42428	418	364	278	310	351	374	369	471	412	488	458	240	634	684	715	794	721	766	537	659	626	792	686	703	539	473	506	715	665	717	Predicted protein
Phatr3_J42429	1017	900	400	898	794	890	713	720	776	804	816	436	886	975	877	910	823	854	967	1015	1032	1312	1177	1043	1019	856	821	946	1069	1112	Predicted protein
Phatr3_EG01843	335	279	211	335	301	315	204	204	171	287	229	110	86	57	60	62	49	43	44	17	19	26	32	56	17	23	29	29	24	25	NA
Phatr3_J42431	118	112	34	99	85	100	189	180	189	221	189	108	124	128	128	119	89	67	185	203	154	128	133	181	231	164	144	89	138	145	Predicted protein
Phatr3_J42432	170	121	118	185	170	156	183	240	191	216	210	116	213	278	204	160	159	167	256	307	269	237	233	264	412	396	356	207	203	194	Predicted protein
Phatr3_J4937	2087	1850	1518	1547	1589	1677	1880	2130	1862	2025	1959	1012	1635	1805	1554	1543	1401	1621	2051	1907	2085	2260	2118	1987	2035	1818	1827	1795	2050	1917	Predicted protein
Phatr3_J42434	1703	1456	1355	1191	1202	1209	1368	1301	1018	1255	1104	536	1281	1502	1360	1321	1077	1056	1600	1487	1614	1810	1713	1728	1256	1330	1364	1488	1490	1505	Predicted protein
Phatr3_J9344	889	737	775	515	625	613	12	15	3	49	48	49	302	244	201	378	372	293	844	710	724	1228	1207	981	257	254	293	897	915	806	NA
Phatr3_J8866	814	732	156	598	587	598	446	441	458	511	524	239	557	631	518	514	557	458	1027	838	836	1099	949	993	654	540	547	949	835	917	Predicted protein
Phatr3_J42437	58	51	1	73	27	70	31	23	26	37	31	24	20	31	30	34	13	28	43	27	44	69	41	36	37	28	30	35	58	37	Predicted protein
Phatr3_J31420	395	404	243	493	390	401	305	236	201	351	289	128	394	451	402	358	299	310	485	380	410	264	310	252	409	503	444	216	271	269	Predicted protein
Phatr3_J9252	357	350	311	330	401	321	577	611	467	641	585	303	416	508	374	432	330	377	444	443	504	470	505	406	459	450	529	387	395	465	Predicted protein
Phatr3_J42439	639	520	228	499	501	481	326	264	354	293	351	177	375	404	379	346	253	271	512	508	546	454	527	507	413	450	422	404	405	451	Predicted protein
Phatr3_J31423	176	143	15	134	116	113	67	73	56	59	49	44	120	104	73	49	44	56	180	198	178	122	72	93	229	187	189	76	103	91	Predicted protein
Phatr3_J42440	179	134	56	207	147	201	55	24	49	47	62	37	70	63	74	28	20	28	79	37	60	10	26	26	35	55	45	27	32	25	Predicted protein
Phatr3_J42441	1092	929	104	793	611	846	393	361	464	517	539	270	498	494	377	521	404	518	851	537	600	1095	973	872	336	257	203	822	723	725	NA
Phatr3_J42442	2175	1818	944	1741	1700	1918	1128	1040	905	1455	1374	623	1362	1492	1290	1732	1623	1682	1460	1271	1382	1876	1729	1874	1036	934	972	1505	1498	1546	Predicted protein
Phatr3_J6387	350	305	141	423	379	379	162	129	97	183	183	99	251	206	222	175	229	196	129	136	148	99	162	144	163	119	161	134	146	124	Predicted protein
Phatr3_J42443	932	734	396	556	655	629	794	774	709	928	812	404	662	656	619	689	642	661	877	753	802	1026	963	872	840	724	675	832	905	914	Predicted protein
Phatr3_J31429	77	97	0	63	57	73	68	39	78	58	66	26	70	87	62	68	38	77	91	94	115	114	82	99	70	62	74	109	96	103	Predicted protein
Phatr3_EG01838	0	1	0	3	2	0	2	0	0	1	0	0	1	5	2	0	0	0	1	1	0	0	0	0	0	3	2	0	0	1	NA
Phatr3_J53929	549	509	350	492	470	494	319	287	290	288	307	131	362	296	279	264	203	183	337	322	324	267	279	337	323	267	299	261	261	277	Mevalonate kinase	MK
Phatr3_EG01882	879	894	230	998	821	881	1842	1882	1603	1819	1549	831	1335	1608	1490	1491	1436	1410	1170	1172	1186	1177	1048	1071	1578	1332	1236	1044	1026	1107	NA
Phatr3_J31431	0	1	0	3	0	1	0	0	0	0	1	0	0	2	0	0	0	1	0	0	0	1	0	0	0	0	0	0	0	0	Predicted protein
Phatr3_EG01820	40	39	35	36	20	28	50	29	52	32	34	6	16	24	25	22	17	16	22	24	30	41	39	32	12	12	19	30	36	30	NA
Phatr3_J31432	51	36	0	39	35	31	51	43	60	45	54	32	20	31	28	31	16	25	28	32	39	44	30	43	10	18	13	34	33	38	Predicted protein
Phatr3_J31433	1281	1179	525	2508	2140	2280	6830	7186	6871	10132	9903	5031	587	783	649	932	1081	1014	330	582	565	331	387	381	617	510	485	514	588	491	Predicted protein
Phatr3_EG01782	0	0	0	0	0	0	0	0	0	0	0	0	0	0	0	0	0	0	0	0	0	0	0	0	0	0	0	0	0	0	NA
Phatr3_J31434	378	333	474	915	587	663	75	100	79	88	66	49	4	15	12	6	22	9	5	3	8	12	4	3	10	7	5	13	6	11	Predicted protein
Phatr3_EG02461	481	454	344	495	397	438	226	232	168	200	167	102	90	62	69	53	47	56	52	62	69	72	40	42	54	81	57	28	59	45	Predicted protein
Phatr3_J31436	304	273	21	313	229	217	73	70	57	138	109	58	486	485	472	537	452	449	419	563	426	435	406	378	583	497	473	374	418	431	Predicted protein
Phatr3_J31437	375	297	168	345	297	349	104	110	103	150	97	54	128	102	124	86	99	96	53	60	44	63	67	62	58	68	46	48	60	70	Predicted protein
Phatr3_J42447	318	312	238	697	623	677	1152	902	780	892	842	410	51	85	65	93	104	71	18	28	11	24	32	38	26	18	30	39	32	26	Cytosolic aldolase	FBA4
Phatr3_EG01815	344	350	0	281	230	273	291	375	393	349	341	170	304	266	244	230	199	244	195	257	252	269	205	238	293	235	236	218	227	212	NA
Phatr3_J31440	987	964	802	904	927	963	854	676	720	910	876	427	1411	1498	1158	1193	1118	986	1383	1527	1570	1431	1275	1474	1497	1900	1913	1269	1279	1382	Acyl carrier protein	ACPZ
Phatr3_J17166	677	529	544	597	511	565	564	545	544	721	607	339	425	469	366	472	416	417	445	453	392	463	489	402	498	423	349	393	362	359	Predicted protein
Phatr3_J31442	110	95	54	125	126	121	353	454	370	512	385	181	243	306	293	223	275	237	409	475	358	439	352	261	639	391	454	244	357	342	Predicted protein
Phatr3_J42451	23	12	7	11	14	12	16	24	5	21	17	13	46	80	51	65	62	53	223	179	160	299	286	174	188	167	150	163	248	254	Predicted protein
Phatr3_J42452	233	211	149	183	211	231	303	329	262	369	288	151	360	442	430	335	315	324	559	600	565	582	498	491	368	374	376	447	436	444	Predicted protein
Phatr3_EG02462	1635	1370	2193	1449	1174	1272	9446	9593	7395	9715	8829	3839	2261	3170	2994	1748	2048	2037	1703	2168	2002	850	806	699	3517	2945	2907	721	745	633	Predicted protein
Phatr3_EG02453	520	553	733	474	471	444	628	576	574	769	571	398	523	578	593	468	437	450	601	654	665	648	622	542	528	532	510	539	510	488	Predicted protein
Phatr3_J31447	541	541	379	506	450	532	252	239	216	270	267	110	300	193	204	183	137	116	300	359	327	234	232	250	337	359	317	202	202	233	Predicted protein
Phatr3_J17172	619	500	171	681	526	666	541	507	599	647	611	316	445	527	445	379	444	462	871	879	876	947	753	921	589	640	595	681	593	731	NA
Phatr3_EG02409	1189	1041	558	1132	1000	974	974	1055	805	1092	1001	499	830	907	843	798	625	572	931	872	886	893	822	817	834	752	720	759	823	840	Plastidic inositol phosphatase	FBPC2
Phatr3_J9359	445	463	218	471	355	421	162	127	104	168	168	89	200	201	193	235	244	188	89	44	64	107	115	138	38	51	39	111	114	107	Fructose-1, 6-bisphosphatase	FBPC3
Phatr3_J42457	882	803	440	933	718	914	2738	2952	2542	2541	2312	1243	1328	2142	2002	1178	1377	1419	517	918	588	234	261	218	2404	1474	1697	301	252	218	Predicted protein
Phatr3_J31453	44	29	20	31	28	20	46	66	75	44	35	24	109	135	125	43	76	69	48	79	59	48	54	25	112	131	101	52	49	52	Predicted protein
Phatr3_J42458	938	873	1416	700	747	712	1462	1441	1496	1757	1561	987	2304	2889	2516	2257	2044	2403	2922	2899	2833	2791	2840	2792	1380	1623	1698	2279	2207	2575	Phosphoserine transaminase	PSAT
Phatr3_J42459	283	291	156	259	220	192	273	303	297	274	271	137	298	375	313	257	300	275	247	232	290	285	246	244	256	252	244	247	314	253	Predicted protein
Phatr3_J8760	372	359	137	533	416	540	607	659	717	968	911	577	98	112	106	174	209	153	58	53	57	166	150	101	80	45	59	101	110	115	Predicted protein
Phatr3_J42461	241	230	53	278	222	217	149	128	99	197	199	75	157	89	116	109	96	137	153	161	159	137	134	182	136	107	114	191	140	124	Predicted protein
Phatr3_J31458	89	78	0	79	81	97	80	77	58	75	64	41	67	73	58	50	84	59	104	113	109	117	111	102	127	104	113	106	88	82	Predicted protein
Phatr3_EG01752	226	211	115	156	148	201	128	140	191	192	201	111	169	159	160	221	199	206	285	298	260	330	276	268	260	204	176	255	258	273	NA
Phatr3_J53933	715	605	217	539	449	516	175	197	209	291	316	186	304	299	261	368	320	289	486	368	395	649	605	505	274	267	243	506	501	442	Predicted protein
Phatr3_J42464	274	222	181	190	250	184	303	330	265	387	414	199	396	492	440	458	417	555	1245	1186	936	1511	1370	1145	928	667	727	1056	1215	1079	Predicted protein
Phatr3_J17184	453	412	244	365	344	379	575	745	543	715	591	405	416	480	422	412	437	439	458	397	383	488	350	375	408	340	345	393	404	382	NA
Phatr3_J42466	293	293	10	342	252	306	191	178	182	275	260	110	6	9	3	49	18	17	1	1	3	0	4	7	0	1	1	8	1	3	Predicted protein
Phatr3_EG02454	1331	1307	899	1077	1146	1129	1618	1680	1473	1795	1714	829	1200	1225	1071	1206	1329	1216	1663	1621	1637	1910	1629	1688	1897	1547	1547	1574	1561	1610	Predicted protein
Phatr3_J31465	423	439	72	477	440	427	831	830	779	947	932	461	620	634	562	706	594	742	1168	1144	1040	1409	1221	1080	714	688	672	1007	1041	1001	Predicted protein
Phatr3_EG02455	46	27	24	74	50	62	45	60	46	78	77	40	14	5	6	4	13	6	0	2	2	4	20	2	1	0	0	0	6	6	Predicted protein
Phatr3_EG02451	469	434	231	424	322	411	424	343	285	407	380	158	21	11	11	56	31	23	34	54	34	9	12	12	59	63	63	6	9	6	Cyanate hydratase	CYN
Phatr3_J8934	260	252	29	265	158	314	97	90	105	118	109	54	2	9	3	8	6	14	2	2	3	8	7	4	1	0	0	10	7	0	NA
Phatr3_J31469	197	182	32	151	130	160	62	45	65	75	87	35	51	46	41	36	20	45	87	58	48	145	117	102	32	21	26	75	82	78	Predicted protein
Phatr3_EG02456	2330	2276	861	1916	2029	1916	1921	2030	2097	2199	1988	1142	1960	2091	1974	2060	1731	1965	1929	2006	1873	2577	2129	2340	1943	1657	1663	2119	2095	2290	Serine/threonine-protein phosphatase
Phatr3_J42473	329	348	144	380	288	267	94	83	112	97	96	53	118	125	110	77	56	78	67	38	67	51	56	68	24	38	42	45	59	41	Predicted protein
Phatr3_J42474	199	176	55	171	187	166	191	229	218	313	286	192	400	601	601	485	597	628	948	881	856	1122	1017	747	993	626	684	897	1048	1025	Predicted protein
Phatr3_J17198	1637	1515	632	1286	1393	1562	1116	977	1138	1337	1264	932	1725	1934	1655	2143	1949	2227	3075	2897	2880	3993	3640	3591	2267	2137	2138	3183	3101	3180	Predicted protein
Phatr3_J31474	1655	1470	231	1178	1028	1127	550	459	528	983	895	453	831	629	582	2213	1940	2339	8	5	13	163	136	239	22	16	18	256	217	195	Predicted protein
Phatr3_EG02407	1457	1286	1108	1223	980	1071	631	474	576	916	826	427	165	145	127	713	655	669	83	64	67	174	157	173	63	65	33	163	153	136	Predicted protein
Phatr3_J42479	283	248	53	407	329	431	265	295	342	310	289	103	45	41	46	30	34	36	12	12	26	12	11	22	35	32	22	18	10	14	Predicted protein
Phatr3_J42481	600	545	286	635	494	487	478	430	410	601	524	257	380	319	276	249	203	254	261	188	197	215	191	182	230	173	161	174	157	155	Predicted protein
Phatr3_J17199	1383	1216	420	1163	1129	1214	1640	1453	1565	1330	1118	688	1407	1609	1483	1451	1331	1301	1447	1499	1375	1614	1491	1429	1980	1650	1772	1287	1191	1395	NA
Phatr3_J42483	1114	933	381	853	700	767	183	104	161	271	237	142	123	58	82	448	382	371	2	8	3	12	11	15	5	4	6	22	20	10	Predicted protein
Phatr3_J42484	620	478	185	506	463	474	239	209	254	308	291	164	429	397	359	456	435	348	272	305	320	295	268	306	365	346	324	323	342	272	Predicted protein
Phatr3_J53935	2240	2034	2166	1938	1984	2006	233	181	281	405	303	211	2532	2711	2318	2682	2109	2375	2484	2940	3145	3522	3177	3612	2188	2729	2658	2948	2651	3140	Ribulose-phosphate 3-epimerase	RPE
Phatr3_J9462	3438	3166	4770	4042	3157	3428	7827	9211	5965	7149	6425	2702	1838	2994	3101	1647	1740	1670	407	791	480	346	327	312	1193	866	807	308	340	304	Predicted protein
Phatr3_J42487	1716	1539	1538	2034	1415	1657	1179	1228	1051	1263	1080	418	831	837	714	485	483	436	630	569	503	273	273	284	888	717	689	248	267	210	Predicted protein
Phatr3_J31486	279	293	122	405	226	313	183	190	111	237	185	86	141	106	96	72	70	62	247	213	149	89	87	100	328	177	189	103	79	98	Predicted protein
Phatr3_J42488	842	838	398	889	787	896	1550	1640	1492	1725	1539	824	194	204	173	318	257	319	62	35	57	77	67	75	45	36	41	66	66	80	Predicted protein
Phatr3_J9007	239	220	73	174	202	183	89	89	79	107	123	77	151	142	131	147	135	130	131	94	141	192	174	197	72	68	89	166	149	169	Predicted protein
Phatr3_J9033	642	612	514	559	500	613	589	671	537	795	762	337	594	676	601	675	680	720	564	559	532	744	754	625	590	436	472	672	650	556	Predicted protein
Phatr3_J3311	354	364	250	347	334	365	753	791	688	784	729	301	68	74	100	110	137	109	29	33	39	65	64	59	54	49	32	43	62	54	Cysteine synthase	CYSK
Phatr3_J9319	470	365	469	401	351	424	353	320	213	410	365	157	368	463	325	381	385	345	508	487	472	566	543	491	554	412	425	491	466	448	Predicted protein
Phatr3_J31492	257	251	15	131	176	195	257	307	312	336	279	167	314	316	327	300	309	310	342	277	324	336	297	327	243	194	194	306	233	307	Predicted protein
Phatr3_J17215	317	304	44	314	287	309	302	341	287	335	408	173	147	194	196	205	201	251	181	144	149	179	173	205	114	125	91	250	173	175	Predicted protein
Phatr3_J31494	247	205	119	168	236	202	1025	1041	803	1110	1006	491	542	696	664	718	753	903	741	810	695	980	949	713	717	537	518	679	864	781	Predicted protein
Phatr3_J42494	1351	1030	10	744	819	1369	242	232	236	392	409	164	732	729	511	968	846	1177	129	95	79	588	518	889	53	93	102	744	425	565	Predicted protein
Phatr3_EG01836	6	11	0	7	11	4	2	3	4	8	8	0	3	2	4	15	10	7	3	2	2	8	4	5	0	3	0	5	12	5	NA
Phatr3_J42495	352	333	247	254	267	281	440	405	354	511	467	243	490	542	401	563	587	609	1703	1563	1438	2242	2034	1733	1143	888	882	1645	1561	1433	Predicted protein
Phatr3_J42496	499	524	332	469	450	421	261	278	322	392	380	194	362	305	229	324	260	307	358	429	400	533	454	478	383	316	248	395	439	436	Predicted protein
Phatr3_J42497	1365	1198	731	925	1009	1027	821	1030	888	1171	1138	508	1007	1026	857	1144	1005	1176	1249	1000	1081	1610	1525	1305	1340	755	740	1369	1398	1288	Predicted protein
Phatr3_EG01753	4	2	0	3	0	4	2	1	0	3	0	0	4	9	3	2	2	1	5	0	1	3	1	5	5	1	1	3	1	2	NA
Phatr3_J42498	591	508	331	490	492	531	807	892	788	1096	1027	465	932	1331	1139	1388	1310	1428	1145	1295	1306	1481	1349	1387	1290	1070	1151	1305	1222	1324	Predicted protein
Phatr3_EG01826	697	719	515	560	576	525	686	821	759	973	805	396	854	834	896	789	844	758	980	845	908	1060	934	900	1360	756	823	828	969	857	NA
Phatr3_J42500	382	379	218	220	267	284	380	441	423	382	398	205	348	429	363	439	366	472	554	470	427	604	570	504	758	506	458	497	523	486	Predicted protein
Phatr3_J42501	862	746	206	684	736	708	1008	985	901	1100	896	454	959	1014	977	1141	928	917	863	830	878	1172	1000	1056	961	926	852	1004	856	1027	Predicted protein
Phatr3_EG01854	0	0	0	0	0	0	0	0	0	0	0	0	0	0	0	0	0	0	0	0	0	0	0	0	0	0	0	0	0	0	NA
Phatr3_EG01855	0	0	0	0	0	0	0	0	0	0	0	0	0	0	0	0	0	0	0	0	0	0	0	0	0	0	0	0	0	0	NA
Phatr3_J42502	53	69	16	62	64	58	19	13	18	16	31	15	5	9	2	10	7	9	7	17	18	20	14	20	3	10	13	12	24	12	Predicted protein
Phatr3_J42503	534	475	338	499	422	464	244	257	278	325	303	203	435	365	416	334	308	306	620	694	642	523	477	501	816	606	604	389	457	432	Predicted protein
Phatr3_J8683	52	36	7	48	69	58	266	291	230	266	304	168	25	30	24	36	38	28	91	86	88	85	88	78	127	86	90	67	97	79	Predicted protein
Phatr3_J42504	259	268	0	192	211	250	232	309	352	320	224	163	291	288	251	334	291	294	193	225	269	324	251	397	254	302	281	292	214	307	Predicted protein
Phatr3_EG01833	0	0	0	0	2	0	0	0	0	0	0	0	0	0	0	0	0	0	0	0	0	0	0	0	0	0	2	0	0	0	NA
Phatr3_J42505	872	753	534	724	686	691	442	435	397	646	555	241	496	500	412	658	534	614	560	500	529	785	780	772	262	302	296	762	692	644	Predicted protein
Phatr3_J31508	142	166	0	104	141	130	110	70	75	86	72	39	133	121	102	125	107	87	107	95	130	125	138	149	61	115	63	108	118	118	Predicted protein
Phatr3_EG02200	0	0	0	0	0	5	1	0	0	0	1	0	0	0	0	0	0	0	0	0	0	0	0	0	0	0	0	0	0	0	Predicted protein
Phatr3_EG02192	15995	13394	21568	14955	12968	13209	2576	1893	1880	3361	3114	1805	679	434	354	1549	1168	1115	183	148	136	311	338	375	80	125	67	221	302	296	NA
Phatr3_J42507	249	212	30	221	248	292	763	939	761	911	787	390	254	320	257	302	274	273	66	59	61	42	33	49	136	96	103	62	58	49	Predicted protein
Phatr3_J31511	249	226	228	235	215	224	87	85	102	124	122	83	249	196	173	188	212	181	125	126	113	119	126	173	130	96	111	140	106	96	Predicted protein
Phatr3_J1598	431	403	256	340	279	404	140	130	148	248	228	99	370	359	276	371	353	357	392	321	355	495	462	433	333	242	237	430	458	404	NA
Phatr3_J42510	199	195	95	247	255	260	275	284	258	347	393	250	262	374	277	343	429	318	266	339	277	303	256	265	686	478	566	250	288	328	Predicted protein
Phatr3_EG01794	59	70	4	54	44	62	36	41	41	33	26	20	37	31	17	20	22	22	78	57	62	56	62	60	118	57	83	54	35	30	NA
Phatr3_EG01884	0	0	0	0	0	0	0	0	0	0	0	0	0	0	0	0	0	0	0	0	0	0	0	0	0	0	0	0	0	0	NA
Phatr3_J42512	1443	1207	548	1322	1176	1244	1373	1703	1455	1778	1700	847	1445	1680	1518	1540	1778	1728	2032	1903	1759	2296	2036	1845	2372	1547	1617	1952	2009	1780	Predicted protein
Phatr3_EG01811	0	0	0	0	0	0	0	0	0	0	0	0	0	0	0	0	0	0	0	0	0	0	0	0	0	0	0	0	0	0	NA
Phatr3_EG01762	0	0	0	0	0	0	0	0	0	0	0	0	0	0	0	0	0	0	0	0	0	0	1	0	0	0	2	0	0	0	NA
Phatr3_J42513	497	469	582	390	360	378	323	312	394	402	377	196	345	316	334	328	360	384	374	386	331	430	470	394	390	288	264	412	413	344	Predicted protein
Phatr3_J42514	1458	1256	2224	1530	947	1208	3134	3254	2769	3150	2914	1601	176	129	122	104	88	106	258	127	189	140	140	175	242	184	159	70	88	58	Predicted protein
Phatr3_J31518	0	0	0	0	0	0	0	0	0	0	0	0	0	0	0	0	0	0	0	0	0	0	0	0	0	0	0	1	0	0	Predicted protein
Phatr3_J42515	1228	924	932	982	996	867	1204	876	691	1008	1018	464	798	758	696	719	615	495	811	773	760	837	750	691	421	499	488	610	729	691	Predicted protein
Phatr3_J53939	1320	1172	1420	1204	1031	1055	5656	5882	4768	5642	5121	2465	1308	1588	1559	1043	1093	1162	994	1207	1132	689	729	606	1457	1218	1228	613	562	677	Proteasome alpha 1 subunit
Phatr3_J24353	3739	3383	4266	3357	3089	3514	2812	2531	3242	3921	3969	2514	1784	1789	1696	2793	2455	3019	1066	930	981	2198	2018	2158	221	295	295	1607	1538	1709	3-deoxy-7-phosphoheptulonate synthase	AROA
Phatr3_J42518	302	265	144	226	215	233	306	336	271	407	315	139	409	421	433	385	373	328	236	274	289	281	281	260	246	256	312	256	303	239	Predicted protein
Phatr3_J42519	453	444	164	441	380	419	543	470	427	629	498	238	550	513	515	355	363	369	342	306	395	207	230	228	376	349	333	210	199	239	Fucoxanhin chlorophyll binding protein related
Phatr3_J17226	668	607	154	500	524	615	362	374	349	434	467	251	469	495	517	412	412	381	537	580	515	464	430	463	898	658	694	341	443	441	Predicted protein
Phatr3_J31525	642	451	173	501	399	509	202	165	214	221	274	125	255	210	136	177	142	136	173	148	173	203	167	227	103	105	103	144	166	144	Predicted protein
Phatr3_J42521	117	107	70	153	112	117	25	26	18	18	27	7	43	28	15	27	18	9	78	32	45	55	47	61	20	13	20	37	38	36	Predicted protein
Phatr3_J17228	769	694	505	625	598	635	317	297	329	397	322	175	489	454	366	438	361	375	627	618	676	778	853	796	496	501	537	718	663	756	Predicted protein
Phatr3_J42523	664	573	289	632	604	575	1159	1295	1075	1322	1247	555	867	1038	907	743	608	735	724	762	827	383	350	427	1568	1506	1470	387	371	372	Predicted protein
Phatr3_J31529	73	68	0	53	48	54	35	68	62	60	55	15	26	45	31	42	31	10	47	34	48	28	40	53	30	19	11	41	27	35	Predicted protein
Phatr3_J24362	259	220	92	205	169	253	201	190	171	190	183	81	212	202	178	191	165	128	203	277	222	293	263	260	139	135	149	244	242	176	Predicted protein
Phatr3_J6528	513	457	100	372	383	415	370	349	331	419	362	177	316	295	316	292	235	284	367	319	350	395	341	328	386	307	288	306	327	281	Predicted protein
Phatr3_J17238	865	838	516	839	772	857	941	880	691	1094	1119	579	501	510	516	622	532	592	582	446	466	741	710	746	332	323	320	687	566	624	Anthranilate synthase
Phatr3_EG02195	0	0	0	0	0	0	0	0	0	0	0	0	0	0	0	0	0	0	0	0	0	0	0	0	2	0	0	1	0	0	NA
Phatr3_EG02474	0	0	0	0	0	0	0	0	0	0	0	0	0	0	0	0	0	0	0	0	0	0	2	0	0	0	0	0	0	0	Predicted protein
Phatr3_EG01778	0	0	0	0	0	0	0	0	0	0	0	0	0	0	0	0	0	0	0	0	0	0	0	0	0	0	0	0	0	0	NA
Phatr3_J31535	0	0	0	2	0	5	0	0	0	0	2	0	0	0	0	0	0	0	0	0	0	1	0	1	0	0	0	0	1	0	Predicted protein
Phatr3_J42527	648	596	395	607	524	569	328	341	303	446	382	208	357	343	276	319	280	259	292	304	273	337	321	297	283	265	270	272	253	263	Predicted protein
Phatr3_J31537	0	0	0	0	0	1	0	0	0	1	0	0	0	0	0	0	0	1	0	4	0	0	0	0	0	0	0	0	1	0	Gag-pol polyprotein
Phatr3_J31539	95	131	72	234	177	194	47	40	55	103	71	59	8	15	5	14	14	14	5	10	6	6	3	10	3	7	2	1	6	4	Predicted protein
Phatr3_J42528	11	5	0	18	10	26	48	73	66	58	68	21	6	4	5	7	1	2	0	0	0	6	0	1	0	0	0	0	1	1	Predicted protein
Phatr3_EG01769	8	8	0	11	3	5	1	3	0	13	8	5	2	0	0	4	10	9	6	4	3	17	10	10	9	6	6	6	6	4	NA
Phatr3_J42529	264	232	192	312	290	292	140	141	120	200	170	116	65	27	23	39	28	29	26	14	21	27	21	15	12	10	15	11	16	10	Predicted protein
Phatr3_J42530	29	15	11	28	16	14	129	140	64	148	120	48	23	13	11	17	10	10	0	1	1	1	0	0	2	1	0	0	0	0	Predicted protein
Phatr3_J42531	394	318	254	354	336	308	361	397	406	389	416	225	262	311	265	258	244	256	217	237	248	203	190	174	323	219	235	182	169	168	Predicted protein
Phatr3_J31544	1330	1278	926	1479	1141	1341	867	710	714	965	937	386	701	716	612	558	536	559	860	747	742	806	752	696	895	785	809	619	755	695	Predicted protein
Phatr3_J9386	32	33	0	26	23	25	38	23	21	40	27	21	25	33	15	31	18	16	41	39	22	26	42	32	37	30	16	33	36	29	Predicted protein
Phatr3_EG01806	10	16	0	1	6	21	5	8	3	10	5	5	20	15	8	2	11	15	17	15	23	8	15	19	27	18	15	12	11	15	NA
Phatr3_EG01807	542	436	138	397	393	389	269	230	283	320	268	158	178	160	118	236	165	175	181	209	194	301	276	305	249	162	152	215	204	209	NA
Phatr3_J9180	835	753	553	534	650	671	202	180	224	433	401	233	1192	1333	1164	1281	1120	1184	3401	3286	3195	2695	2495	1753	5050	3738	3829	1891	2362	2438	NA
Phatr3_J42534	247	255	231	194	184	200	90	52	60	74	71	17	176	126	128	81	88	59	188	162	144	168	142	149	146	159	132	124	143	135	NA
Phatr3_J42535	327	351	172	367	295	305	297	301	263	304	400	149	352	326	357	265	269	227	275	332	379	314	290	293	350	348	336	277	250	229	Predicted protein
Phatr3_J9538	3002	2979	1074	2645	2982	3183	4365	4048	4614	5020	4521	2654	6567	8307	7193	7084	6272	7296	9182	9614	9584	10736	9602	10097	8552	9560	9579	8669	8506	9319	Predicted protein
Phatr3_EG01766	0	0	0	0	0	0	0	0	0	0	0	0	0	0	0	0	0	0	0	0	0	0	0	0	0	0	0	0	0	0	NA
Phatr3_EG01776	0	0	0	0	0	0	0	0	0	0	0	0	0	0	0	0	0	0	0	0	0	0	0	0	0	0	0	0	0	0	NA
Phatr3_EG01784	0	0	0	0	0	0	0	0	0	0	0	0	0	0	0	0	0	0	0	0	0	0	0	0	0	0	0	0	0	0	NA
Phatr3_J42537	104	84	1	110	103	97	131	101	102	132	101	73	79	127	74	91	74	102	117	101	84	93	95	81	130	70	89	112	112	123	Predicted protein
Phatr3_J51345	468	467	419	475	411	379	309	291	293	341	300	181	338	337	334	284	251	283	375	429	409	412	371	356	275	311	305	297	266	369	Histone acetyltransferase
Phatr3_J42538	3	17	12	8	3	7	4	1	2	10	0	1	0	1	1	2	2	1	0	0	3	0	3	5	8	1	1	1	2	0	Predicted protein
Phatr3_J42539	176	173	104	132	126	181	207	183	171	206	205	89	166	241	242	226	258	224	130	101	140	146	154	176	95	80	83	140	146	114	Predicted protein	HCDK2
Phatr3_J9342	833	753	257	869	624	813	510	462	460	525	548	264	358	296	226	228	196	166	37	23	19	21	35	27	43	29	26	20	27	25	Predicted protein
Phatr3_J31556	541	505	209	593	411	504	827	873	796	1007	780	385	462	611	553	534	521	516	378	364	394	445	419	423	360	355	353	409	320	402	Predicted protein
Phatr3_EG02412	941	906	232	865	848	809	629	642	610	809	823	460	758	761	771	772	761	753	641	687	611	610	599	608	561	490	583	639	619	604	Predicted protein
Phatr3_J31559	253	220	121	197	183	191	146	105	109	190	145	75	167	154	166	120	136	155	148	153	131	177	114	146	204	129	118	117	138	145	Predicted protein
Phatr3_J42543	2500	2224	1224	1800	2042	1983	2473	2369	2529	2596	2401	1499	1925	2010	1831	2578	2375	2456	1311	1492	1609	2722	2323	2585	784	912	893	2115	2136	2264	Predicted protein
Phatr3_J9185	791	794	282	713	559	817	692	633	650	950	852	458	815	981	927	987	1021	1123	629	576	606	576	572	587	856	558	546	641	592	606	NA
Phatr3_EG02183	574	429	242	396	427	399	234	208	251	318	231	175	457	508	462	474	378	367	511	522	491	466	514	467	493	490	498	449	417	458	Predicted protein
Phatr3_EG02182	1070	1016	353	889	908	866	1108	1073	995	1235	1228	610	1130	1212	1162	916	978	940	720	960	937	882	707	704	1082	1024	988	705	701	718	NA
Phatr3_J42546	469	425	237	299	311	358	131	79	156	184	181	98	392	370	399	432	333	334	561	536	566	673	549	646	392	312	370	586	549	537	Predicted protein
Phatr3_J42547	1384	1243	547	1099	1133	1273	474	460	555	603	494	288	745	617	507	690	552	645	707	626	784	1005	924	933	375	384	475	888	758	925	Predicted protein
Phatr3_J42548	210	188	120	209	184	165	255	242	209	267	250	121	216	168	151	216	182	197	322	399	328	396	329	366	286	249	208	295	288	362	Predicted protein
Phatr3_J17259	758	673	345	590	535	602	3846	4135	3490	3788	3470	1509	741	998	912	809	784	921	383	503	485	274	288	239	1042	738	758	279	263	282	Regulatory proteasome non-atpase subunit 8	RPN8
Phatr3_J3062	493	456	203	469	365	418	277	317	248	379	353	139	206	192	175	180	180	158	445	333	353	322	310	393	302	198	236	303	268	276	Histone acetyltransferase	MYST
Phatr3_J17265	314	337	182	580	392	511	228	203	180	269	232	101	57	32	37	33	30	28	37	46	52	48	32	48	30	44	34	26	50	47	NA
Phatr3_J9546	304	287	115	355	225	314	86	103	81	105	85	52	110	65	101	40	44	64	128	98	104	62	56	55	142	137	141	36	64	35	Predicted protein
Phatr3_J42552	531	437	390	396	385	430	311	343	314	426	390	206	387	483	459	520	493	505	751	660	680	701	680	600	586	491	587	543	659	596	Predicted protein
Phatr3_EG01787	43	57	0	19	17	49	26	47	46	32	54	24	17	8	5	30	23	13	14	5	6	15	16	19	13	4	8	13	9	22	NA
Phatr3_J83	817	821	95	618	515	672	628	701	684	739	691	404	206	200	209	368	305	346	238	240	194	383	366	295	191	127	125	314	296	291	Predicted protein
Phatr3_J31571	392	378	576	411	414	396	193	119	166	220	223	103	66	81	68	115	104	82	121	96	92	170	195	113	68	64	77	129	97	90	Predicted protein
Phatr3_J42555	375	332	21	294	240	307	789	1053	721	820	732	398	376	498	386	325	357	342	569	547	478	517	452	450	652	447	518	400	398	403	Predicted protein
Phatr3_J42556	161	182	21	138	180	202	108	80	131	152	169	93	325	319	341	271	266	354	677	696	676	773	730	664	574	535	533	590	628	564	Predicted protein
Phatr3_J42557	304	266	59	160	213	187	203	297	214	373	410	204	223	342	269	303	263	375	668	660	585	756	695	574	572	354	395	578	698	586	Predicted protein
Phatr3_J5762	202	213	86	178	188	175	532	506	437	606	633	228	226	219	202	188	173	176	166	171	147	168	176	167	85	134	106	172	182	133	Predicted protein
Phatr3_J42559	1055	1015	1017	778	915	771	930	875	788	1083	965	454	944	911	927	1053	855	877	990	1290	1049	1279	1086	1148	1016	930	1008	1005	957	984	Predicted protein
Phatr3_J42560	360	311	89	305	316	340	354	368	265	384	392	192	251	342	260	287	273	274	606	612	532	729	633	565	707	544	573	535	459	557	Predicted protein	PTBZIP12
Phatr3_J31578	262	256	172	207	209	218	323	278	306	311	292	130	480	487	461	528	483	385	290	264	300	373	326	366	368	463	287	341	406	414	Predicted protein
Phatr3_J42561	416	380	28	334	330	333	156	118	183	146	149	84	129	107	51	145	100	89	105	76	113	194	189	185	62	46	57	171	166	154	Predicted protein
Phatr3_J17276	1905	1607	2474	1731	1493	1439	1142	1069	1098	1302	1309	662	1170	1196	1211	1089	924	905	1154	1071	1151	1181	1133	1127	1017	1003	861	1030	1006	1074	Predicted protein	SKP1_1
Phatr3_J42563	423	411	215	383	379	363	186	169	183	195	240	138	254	226	202	207	183	180	394	371	378	479	376	374	338	315	280	387	378	398	Predicted protein
Phatr3_J42564	704	862	281	1343	1433	1519	400	331	309	531	469	269	356	417	400	406	466	388	218	274	231	396	363	390	285	271	285	392	368	382	Predicted protein
Phatr3_J42565	984	836	257	740	804	807	240	197	291	310	282	192	981	978	912	961	887	906	1068	1190	1233	1616	1402	1459	951	905	918	1140	1076	1296	Predicted protein
EPrPhatr3G00000013101	1	1	0	3	1	3	11	6	0	13	3	4	2	6	1	6	3	1	6	1	0	3	0	0	5	1	1	1	1	7	NA
Phatr3_J31584	135	118	60	102	138	128	910	1068	898	964	848	372	240	366	321	260	290	248	689	759	527	908	879	535	872	586	634	579	842	777	Predicted protein
Phatr3_J42566	14781	13305	17232	12435	10973	11423	51537	52513	38549	46724	42799	19185	19058	25260	25356	18305	17061	18228	8143	11011	10708	9025	8772	8591	12456	10005	10231	8669	9112	9207	Predicted protein
Phatr3_J42567	970	892	708	957	737	969	684	664	761	934	939	480	250	267	242	214	243	270	501	402	434	568	471	432	331	266	215	415	328	351	Beta-glucan elicitor receptor	BGER1
Phatr3_EG02435	317	245	47	238	215	254	487	398	306	415	341	177	1529	1388	1172	1210	1184	905	913	788	1034	1409	902	1108	1503	1471	1103	1194	1444	1402	Predicted protein
Phatr3_EG02436	46	40	34	90	53	83	110	86	76	176	143	79	36	54	36	66	100	93	31	30	11	25	25	43	40	36	68	52	62	43	Predicted protein
Phatr3_J42570	863	749	313	413	717	682	1001	1158	955	1407	1446	703	1424	1702	1498	1841	1722	2004	4675	4056	4066	5902	5106	4446	3036	1889	2122	4298	4224	4209	Predicted protein
Phatr3_EG02165	1248	1056	977	806	1122	916	529	516	465	489	482	260	1810	2234	1991	1971	1945	1786	2121	2297	2206	2640	2644	2133	1717	1647	1495	2307	2599	2648	NA
Phatr3_EG02170	289	234	161	198	210	209	39	52	32	27	33	20	90	86	78	118	66	90	380	290	291	472	418	350	216	142	165	242	314	330	Ubiquitin carboxyl-terminal hydrolase
Phatr3_EG02437	572	503	406	566	607	500	793	643	619	948	895	392	622	656	575	573	558	600	925	879	832	1049	984	807	667	642	605	747	892	848	N-acetyl transferase
Phatr3_J9444	1000	832	507	556	564	632	451	294	371	387	359	164	510	516	407	522	388	402	662	552	616	686	636	739	435	478	511	630	617	604	Predicted protein
Phatr3_J42574	3286	2897	1046	1906	1951	2323	984	768	950	914	807	422	2150	1608	1273	1480	1204	1154	2089	1845	2083	1823	1685	2020	1902	2287	2384	1786	1708	1972	Predicted protein
Phatr3_J31594	253	220	63	232	177	225	114	154	113	154	120	79	104	139	69	118	74	101	128	137	137	133	158	175	71	73	52	120	136	119	Predicted protein
Phatr3_J3211	435	413	157	437	423	494	215	205	166	263	230	131	172	170	150	135	80	102	184	144	141	94	98	128	239	164	159	94	71	74	Predicted protein
Phatr3_J42576	129	150	236	119	175	142	73	60	41	88	70	51	83	46	57	31	27	31	30	40	55	44	19	39	54	34	48	27	37	13	Predicted protein
Phatr3_J42577	2309	2106	404	2083	1818	2189	1336	1430	1558	2238	2017	913	2631	3007	2582	3085	2991	3300	2076	2320	2400	3741	2972	2919	2642	2129	2195	3458	3486	3275	Predicted protein
Phatr3_J42578	156	155	116	159	101	115	133	122	129	121	130	39	100	105	76	79	85	85	137	138	124	130	110	94	134	149	146	85	97	78	NA
Phatr3_J31599	614	519	284	553	511	605	183	190	189	190	160	102	418	448	401	360	265	305	381	367	344	477	387	413	465	523	455	337	370	408	Succinate semialdehyde dehydrogenase	SSDH
Phatr3_J9321	538	477	78	382	339	394	318	245	248	354	323	157	291	369	274	324	258	334	812	673	717	858	712	702	581	487	503	612	639	608	Predicted protein
Phatr3_EG01858	283	275	318	233	220	224	239	252	226	273	231	120	579	623	592	437	425	337	578	524	488	344	273	263	646	641	579	302	361	318	NA
Phatr3_J51305	10949	8175	9255	5988	7305	6906	439	315	442	650	546	305	58445	58155	50058	48230	42067	39160	30078	38147	41403	39218	28867	37240	54943	67864	59173	34903	38487	43533	Predicted protein	CA
Phatr3_J42584	1324	1197	919	975	908	906	362	354	369	499	515	262	643	691	606	757	682	725	1404	1219	1233	1716	1500	1422	1030	673	781	1363	1330	1285	Predicted protein	CDC6
Phatr3_EG02197	307	260	393	249	207	204	160	118	160	202	219	131	156	161	138	135	99	113	255	231	242	282	258	213	195	213	194	211	183	204	Predicted protein
Phatr3_EG02191	136	135	92	188	162	184	153	162	132	125	117	74	40	41	68	32	15	26	34	33	28	10	15	19	49	39	34	15	32	25	NA
Phatr3_J42585	64	69	92	73	74	67	116	92	117	135	114	65	49	65	51	39	62	78	232	205	151	155	118	154	124	98	102	145	135	143	Predicted protein
Phatr3_J42586	149	139	96	302	117	152	860	913	842	1007	906	471	57	47	53	31	42	12	81	52	45	52	81	55	60	56	59	25	69	64	Predicted protein
Phatr3_J42587	660	548	156	493	418	481	557	557	553	595	521	352	524	564	557	552	459	489	947	810	896	947	791	730	1132	786	751	739	687	786	Predicted protein
Phatr3_J42588	714	599	299	522	508	573	751	711	635	699	671	362	899	921	755	907	826	723	991	985	985	1001	916	967	1019	981	895	857	816	972	Predicted protein
Phatr3_J17300	700	623	47	545	508	633	418	394	456	455	419	253	820	821	785	687	602	866	1072	1211	1208	1421	1260	1220	979	791	888	1251	1162	1233	Lissencephaly-1 homolog
Phatr3_J42590	1619	1510	835	1202	1170	1307	608	499	533	606	684	394	1246	1025	792	1066	848	966	1479	1428	1496	1733	1566	1725	881	1106	1143	1415	1435	1510	Predicted protein
Phatr3_J42591	422	367	308	301	287	334	265	264	245	341	297	127	230	313	279	278	252	293	405	417	396	421	390	392	367	309	346	358	410	337	Predicted protein
Phatr3_J42592	576	513	210	447	411	476	562	539	483	644	567	221	436	517	392	478	437	439	791	730	733	902	809	812	768	619	599	723	695	700	Predicted protein
Phatr3_J42593	493	466	172	516	402	490	372	356	374	537	553	263	289	346	310	401	335	466	347	378	319	531	526	460	325	212	298	482	460	451	Predicted protein
Phatr3_J42594	90	76	9	107	79	78	44	33	54	92	57	32	40	20	32	33	26	28	60	51	55	56	58	73	35	39	36	54	59	46	Predicted protein
Phatr3_J42595	283	338	183	330	261	383	129	97	123	173	125	79	123	66	69	52	28	14	93	77	63	39	54	60	98	98	95	70	44	31	Predicted protein
Phatr3_J31617	267	261	175	220	236	208	182	203	191	275	254	132	199	240	220	250	238	280	485	440	401	536	496	404	188	173	167	418	453	510	Predicted protein
Phatr3_J42596	493	431	159	374	380	366	340	345	282	475	404	205	366	359	313	314	308	326	638	545	560	569	612	488	645	510	480	461	479	473	Predicted protein
Phatr3_J31619	432	393	95	490	385	426	470	508	579	857	781	495	304	256	222	423	364	479	36	16	22	54	48	45	36	32	21	74	76	63	Predicted protein
Phatr3_J31620	883	855	275	791	679	680	834	859	782	1280	1217	716	820	846	882	959	936	995	411	536	513	529	497	513	473	428	451	468	527	498	Predicted protein
Phatr3_EG01797	419	331	159	296	265	344	351	372	319	358	290	165	304	309	283	305	300	301	334	278	263	365	306	326	193	207	196	325	307	285	NA
Phatr3_J974	637	489	190	455	361	496	1550	1694	1449	1656	1516	669	809	1193	1107	874	1022	1013	1352	1287	1085	1418	1338	1060	1681	1050	1068	1204	1163	1111	NA
Phatr3_J17304	575	553	174	359	433	403	1255	1160	1266	1442	1391	843	1624	1795	1542	1916	1737	2084	2148	2052	2153	2954	2790	2951	1337	1392	1614	2613	2507	2545	NA
Phatr3_J9283	424	421	203	375	405	386	393	323	366	449	453	200	375	378	327	408	348	389	867	830	782	901	755	791	797	659	657	680	697	674	Predicted protein
Phatr3_J42600	2021	2286	1439	2008	1986	2009	2091	2008	1681	2191	1964	1028	2265	2290	2528	1907	2033	1895	1911	1963	1977	1796	1725	1777	2645	1814	1794	1801	1660	1539	Predicted protein
Phatr3_J31625	324	341	231	306	289	249	240	184	192	275	286	170	300	251	258	293	276	351	531	545	494	601	544	482	376	256	266	464	399	417	Predicted protein
Phatr3_J9653	765	708	930	762	716	777	466	505	396	559	536	242	498	500	410	428	365	407	647	653	686	615	526	570	761	682	628	457	455	524	Predicted protein
Phatr3_J24439	896	807	508	793	714	732	669	665	576	723	676	414	723	757	732	778	643	732	819	745	693	917	822	783	866	746	716	725	812	809	Predicted protein
Phatr3_J42603	204	251	133	205	258	229	7	10	3	10	12	1	758	961	818	698	581	683	2459	2944	2640	1911	1877	1496	3186	3079	3145	1486	1781	1675	Predicted protein
Phatr3_J42604	480	548	446	1022	866	859	295	237	222	333	270	144	217	227	261	214	211	119	342	401	402	264	262	216	542	538	635	193	245	220	Predicted protein
Phatr3_J42605	716	679	650	644	621	605	535	545	448	665	667	312	1373	1598	1705	926	941	835	1805	2513	1849	847	701	659	6704	4734	5101	758	851	727	Predicted protein
Phatr3_EG01879	291	237	107	236	254	292	301	226	230	347	312	177	703	636	602	669	573	608	727	642	853	955	807	931	341	391	418	702	714	871	NA
Phatr3_J42606	787	637	575	627	596	632	191	134	188	233	183	103	288	174	114	218	133	126	331	237	306	317	323	348	159	166	192	245	262	300	Predicted protein
Phatr3_J8167	639	479	586	536	569	424	295	299	226	387	316	157	745	966	960	824	866	663	486	570	599	535	443	375	962	779	679	480	538	505	Thioredoxin m	TRX-M
Phatr3_J31632	632	650	211	439	567	481	1874	1959	1523	2036	1810	804	3294	4447	4447	1295	1153	1239	7195	9914	8434	1484	1296	1283	20432	15249	15644	1325	1346	1386	Predicted protein
Phatr3_J9123	534	594	206	455	405	416	401	350	402	587	500	261	360	343	315	368	345	377	526	385	439	610	596	536	440	287	299	491	549	503	Predicted protein
Phatr3_J42608	154	171	57	135	157	165	362	338	214	440	397	184	70	70	72	123	127	119	38	62	51	73	77	103	30	33	32	74	64	53	Predicted protein
Phatr3_J42609	260	261	129	245	244	225	183	180	169	229	196	104	127	154	162	178	160	160	246	219	220	287	271	256	228	155	225	258	228	239	Predicted protein
Phatr3_EG02202	0	0	0	0	0	0	0	0	0	0	0	0	0	0	0	0	0	0	0	0	0	0	0	0	0	0	0	0	0	0	Predicted protein
Phatr3_EG02185	0	0	0	0	0	0	0	0	0	0	0	0	0	0	0	0	0	0	0	0	0	0	0	0	0	0	0	0	0	0	NA
Phatr3_J8835	913	731	1080	926	782	970	554	479	453	649	575	251	429	440	409	475	384	364	321	207	272	277	237	290	209	248	201	208	194	192	Precursor of cyclase lycopene beta cyclase	LCYB
Phatr3_J42611	638	551	335	464	479	441	114	81	106	173	168	82	351	341	289	464	385	327	387	396	384	618	545	515	211	192	178	473	442	478	Predicted protein
Phatr3_J42612	14299	12584	4776	9790	9487	10197	4118	3836	3914	5684	5219	3054	8092	8222	7644	9100	8112	8829	6782	8962	8107	7847	6736	7368	13017	9847	10161	6672	6931	7073	Predicted protein
Phatr3_J42613	206	161	48	181	108	135	72	103	88	118	96	48	113	128	96	115	72	81	133	83	105	56	57	64	91	90	85	59	46	47	Predicted protein
Phatr3_J42614	672	663	300	567	447	527	385	432	405	460	396	200	283	275	248	267	237	205	400	328	233	326	322	261	371	221	190	241	279	266	Predicted protein
Phatr3_J3241	1176	1019	524	1034	874	1043	2083	2180	1831	2421	2271	932	702	924	805	759	788	955	658	647	568	616	600	638	874	730	795	608	576	572	NA
Phatr3_J42616	534	465	410	393	291	403	350	365	363	429	377	206	250	231	138	157	186	190	245	175	174	275	206	210	224	128	129	228	210	183	Predicted protein
Phatr3_J9327	718	718	100	671	607	807	103	102	120	148	128	93	634	750	579	430	335	366	2830	3447	3161	1000	772	822	4723	4333	5080	747	724	924	Protein translocase subunit SecA	SECA
Phatr3_EG01793	6	6	0	3	4	0	2	8	2	13	6	8	1	5	1	4	6	3	17	10	4	14	7	14	4	6	4	7	13	9	NA
Phatr3_J17324	0	0	0	0	0	0	0	0	0	0	0	0	0	0	0	0	0	0	0	0	0	0	0	0	0	0	0	0	0	0	40S ribosomal protein S4
Phatr3_J9199	4004	3354	3340	2930	2876	2848	3813	3713	3265	4522	4549	2525	4157	3914	3544	4016	3241	3481	3487	4172	4134	4792	4086	4502	3466	3462	3234	3723	4016	4124	Predicted protein
Phatr3_J42619	376	329	130	431	391	451	600	537	481	716	559	286	244	174	173	211	212	165	63	52	46	56	79	124	52	47	53	86	98	88	Predicted protein
Phatr3_J17326	182	145	17	121	91	141	52	36	73	62	77	32	26	10	19	101	92	92	0	0	0	9	5	13	0	0	1	19	6	17	Early light induced protein	LHL1
Phatr3_EG01749	6	12	0	0	1	7	3	3	3	1	3	1	1	0	0	3	6	4	0	0	0	5	0	1	0	0	0	1	3	1	NA
Phatr3_J31649	462	379	179	440	379	408	216	215	218	209	240	99	278	245	241	223	197	178	240	200	213	203	204	238	85	112	100	184	205	160	Predicted protein
Phatr3_J31650	512	437	138	690	443	597	168	153	130	242	204	119	104	66	96	95	76	95	114	65	85	135	113	158	96	92	86	97	86	83	Solute carrier
Phatr3_J41659	580	545	125	312	541	476	738	811	705	871	881	444	1603	2081	1626	2128	1946	2070	3072	3330	2978	5070	3991	4278	1770	1853	1975	3844	3773	3931	Predicted protein
Phatr3_J31652	555	425	86	434	326	370	612	621	497	621	511	307	249	279	313	531	521	496	108	122	119	186	184	128	142	156	100	156	177	190	Predicted protein
Phatr3_J17332	1432	1181	1147	1215	1134	1140	1830	1874	1625	2182	2059	1048	1510	1870	1767	1674	1475	1546	2037	2169	2011	1896	1786	1583	3085	2373	2125	1539	1699	1711	Predicted protein
Phatr3_J4761	280	240	178	171	139	149	218	177	121	154	141	88	179	219	193	129	118	127	169	191	177	168	166	160	196	180	162	109	157	149	Predicted protein
Phatr3_J42624	1594	1488	1140	1351	1111	1223	1807	1965	1732	1995	1850	891	945	903	935	909	776	877	1041	881	888	954	943	990	907	710	700	915	903	805	Predicted protein
Phatr3_J42625	702	568	301	571	475	618	1984	2112	1783	1865	1620	856	740	810	684	670	528	605	711	716	738	577	578	637	935	789	827	550	478	493	Predicted protein
Phatr3_J31657	6	1	0	5	0	3	1	4	8	6	3	4	0	1	4	2	2	2	10	4	0	2	1	0	3	0	2	0	2	1	Predicted protein
Phatr3_J31658	77	92	38	54	85	55	66	76	51	81	80	46	129	102	130	71	67	64	167	193	180	140	135	110	202	146	166	105	106	101	Predicted protein
Phatr3_J42626	435	474	190	346	413	428	299	222	250	363	400	163	420	460	380	466	379	474	1183	1112	1067	1465	1369	1124	803	577	622	978	1131	956	Predicted protein
Phatr3_J17335	209	215	132	183	218	226	168	147	106	182	165	115	381	465	369	401	382	432	551	631	549	751	618	625	614	609	624	667	471	593	Predicted protein
Phatr3_J3851	309	254	153	392	399	414	1366	1350	988	1546	1439	865	398	572	524	454	586	549	260	458	343	343	305	283	607	493	525	301	372	320	Predicted protein
Phatr3_J31662	346	286	185	243	200	233	42	42	70	83	93	52	195	158	161	160	160	148	207	228	195	371	337	338	15	60	40	230	279	257	Predicted protein	DGAT2C
Phatr3_J31663	375	320	153	308	294	324	120	105	112	172	180	119	140	66	70	136	67	82	152	116	124	160	178	180	50	57	36	151	148	122	Predicted protein
Phatr3_J8877	193	208	20	200	169	173	122	121	125	134	129	81	205	228	180	194	163	159	296	309	377	362	308	293	272	303	258	209	280	228	Predicted protein
Phatr3_J31665	445	453	272	346	429	423	360	318	306	344	408	198	356	386	357	342	318	326	548	561	464	457	477	369	589	429	416	401	351	364	Predicted protein
Phatr3_J3171	618	500	685	594	489	610	333	296	376	463	365	168	363	364	309	382	279	304	354	308	330	379	343	367	326	366	352	269	315	306	Predicted protein
Phatr3_J17344	408	312	162	347	346	447	229	201	189	169	143	103	116	154	88	90	71	68	100	98	99	83	114	98	82	66	67	93	104	120	Xanthine/uracil permease
Phatr3_J24474	958	810	752	960	810	882	5771	6088	4812	5331	4980	2166	1012	1368	1353	776	846	851	462	626	623	286	253	263	1281	1074	1073	257	230	188	Proteasome subunit alpha type
Phatr3_J9278	149	128	116	130	112	125	185	199	140	195	189	94	130	97	94	83	61	68	138	154	118	103	123	120	174	138	102	80	103	62	Predicted protein
Phatr3_J42635	341	284	198	273	313	244	285	300	293	356	332	180	280	335	255	249	265	300	411	440	377	491	495	405	354	299	326	369	417	422	Predicted protein
Phatr3_J42636	397	395	221	292	294	311	288	283	232	387	332	168	326	370	407	418	301	448	773	767	765	961	895	765	794	546	595	685	709	746	Predicted protein
Phatr3_EG01869	2858	2558	730	2190	2070	2445	18272	20330	14595	17418	15487	6373	6446	11480	10291	6624	7824	8555	2609	3559	3192	2331	2000	2187	6202	5063	5107	2606	2174	2062	NA
Phatr3_J42638	1551	1389	949	1383	1314	1344	1279	1362	1146	1514	1286	738	911	1149	995	979	920	819	1028	1027	1056	1267	1059	1180	1138	888	1012	973	878	955	Predicted protein
Phatr3_EG01841	0	0	0	0	0	0	0	0	0	0	0	0	0	0	0	0	0	0	0	0	0	0	0	0	0	0	0	0	0	0	NA
Phatr3_EG01822	694	725	221	501	516	485	794	779	777	981	928	528	873	1001	934	1033	984	1032	2095	2074	1818	2470	2164	2033	1663	1103	1152	1840	1805	1888	NA
Phatr3_J53961	153	158	58	143	129	200	106	119	116	108	131	54	71	92	75	50	36	47	62	33	34	35	50	44	63	22	12	45	28	52	RTX toxins and related Ca2+-binding protein
Phatr3_J8407	605	517	416	580	475	515	796	848	706	829	870	414	463	542	532	452	411	454	585	461	511	525	491	496	787	488	488	476	463	430	Predicted protein
Phatr3_J42642	115	94	2	54	66	97	213	313	274	241	235	138	123	189	186	156	202	197	137	182	129	166	142	145	273	210	175	141	111	89	Predicted protein
Phatr3_J42643	592	463	148	500	450	539	732	733	524	747	763	318	462	665	537	506	588	627	478	507	465	456	455	452	811	603	619	452	389	346	Predicted protein
Phatr3_J42644	634	626	169	570	423	509	144	115	159	304	253	125	51	32	28	176	145	136	18	17	14	13	8	20	24	10	24	16	20	6	Predicted protein
Phatr3_J42645	71	70	15	87	81	90	120	179	158	186	192	97	83	85	69	108	103	108	84	67	51	131	107	108	53	27	46	68	121	74	Predicted protein
Phatr3_J42646	422	400	105	369	334	398	137	141	140	190	166	97	150	142	103	116	79	125	236	219	202	238	266	224	169	146	130	187	197	189	Predicted protein
Phatr3_J42647	539	544	137	546	406	457	1063	1044	1034	1253	1132	603	534	741	741	516	588	724	168	201	141	116	120	150	435	215	236	129	107	102	Predicted protein
Phatr3_J31683	17755	14386	6821	13760	11608	14242	3078	2376	3598	7063	6880	4024	3366	2892	2310	11440	10712	12620	14	5	7	488	473	666	22	0	0	722	600	708	Predicted protein
Phatr3_J31684	214	179	81	161	156	156	158	124	109	151	146	62	136	133	174	162	144	151	90	115	114	126	133	146	73	69	46	114	98	122	Predicted protein
Phatr3_EG01814	203	199	96	167	121	163	165	138	141	202	134	65	151	120	127	136	116	109	104	90	99	152	137	134	58	70	62	111	105	132	NA
Phatr3_J42649	335	289	205	382	277	347	1108	1063	848	861	811	394	364	559	453	341	415	475	206	233	188	251	195	198	288	223	264	250	228	183	Predicted protein
Phatr3_J42650	674	523	175	565	532	514	903	961	688	831	871	286	598	867	774	638	734	786	700	640	608	831	944	848	516	390	440	745	840	757	Predicted protein
Phatr3_J17362	1101	839	873	1059	904	800	7551	7235	4839	6102	5335	2263	1414	1811	1878	552	643	589	1132	1749	1392	139	149	170	3324	2943	2921	141	182	124	Predicted protein
Phatr3_J24493	567	573	266	633	627	657	1324	1357	1140	1325	1248	927	803	1078	934	885	884	901	861	1106	1040	1036	1002	992	869	927	966	906	833	887	Eukaryotic translation initiation factor 6	EIF6
Phatr3_EG02175	1	4	0	0	2	2	1	1	11	3	3	1	1	7	0	4	3	3	3	1	4	0	0	2	0	6	3	1	1	0	NA
Phatr3_EG02169	792	726	299	1015	961	1046	613	614	490	673	645	325	498	500	489	323	310	276	359	391	415	239	239	263	438	392	431	228	219	211	NA
Phatr3_EG02171	1016	945	288	775	719	818	337	341	363	416	319	169	470	446	466	496	423	478	263	252	204	367	361	379	138	157	142	350	339	352	Predicted protein
Phatr3_J42654	1033	876	603	860	855	782	586	601	628	842	759	361	730	714	757	758	613	602	632	653	642	787	757	778	544	502	487	604	651	674	Predicted protein
Phatr3_EG01818	394	359	150	352	288	337	193	236	181	284	248	83	160	108	110	117	119	91	99	60	76	70	78	72	221	104	93	80	79	59	NA
Phatr3_J9639	149	140	0	81	51	123	60	58	73	84	68	29	61	49	44	53	42	40	37	26	31	40	26	50	82	28	35	30	20	15	NA
Phatr3_J42656	134	158	154	190	182	161	81	75	39	121	114	73	116	166	121	189	158	163	137	101	145	254	168	166	158	95	110	160	163	155	Predicted protein
Phatr3_J31693	27	35	14	43	22	30	67	66	31	86	90	51	67	103	71	62	103	97	58	78	67	63	65	53	74	46	40	44	68	55	Predicted protein
Phatr3_J8663	606	482	142	558	432	499	564	606	544	700	692	374	254	330	296	322	304	285	372	340	420	361	353	331	327	296	299	250	234	237	Predicted protein
Phatr3_J9197	743	627	727	773	650	607	760	601	537	849	754	471	895	875	984	912	928	751	1308	1245	1230	1356	1391	1194	593	627	717	911	1037	1026	Predicted protein
Phatr3_J9168	307	249	172	316	275	246	258	225	132	254	254	126	212	225	199	199	146	135	245	264	254	219	195	173	176	215	202	133	190	212	NA
Phatr3_J17372	498	431	159	502	460	406	391	384	333	469	460	221	336	349	349	346	252	228	375	410	370	303	337	356	418	392	388	242	261	237	Predicted protein
Phatr3_J42658	304	304	162	315	254	317	191	211	144	293	283	96	193	217	190	168	188	181	277	288	334	281	293	310	322	291	292	235	260	265	Predicted protein
Phatr3_J42659	1793	1415	1206	1466	1430	1420	1719	1558	1418	1612	1611	779	1902	2647	2693	1219	1177	1204	1132	1517	1327	315	260	256	3887	3298	3282	272	288	260	Predicted protein
Phatr3_J5466	1099	946	381	854	746	955	4183	4857	3927	4233	3824	2129	2129	3341	3502	2272	2511	2985	1164	1596	1238	1062	917	965	2984	1763	2112	942	1005	968	Predicted protein	SDER1-1
Phatr3_J42660	216	188	118	201	158	173	238	251	191	261	271	100	160	228	197	194	170	188	253	306	257	188	145	199	431	361	362	177	158	173	Predicted protein
Phatr3_EG01774	128	131	115	75	106	72	23	17	17	40	20	23	41	51	34	34	37	44	78	82	82	106	118	113	34	24	40	83	91	94	NA
Phatr3_J53964	711	554	257	532	524	527	471	506	482	602	551	350	686	742	648	706	669	690	946	883	816	1013	1076	939	904	733	724	843	841	857	Probable calcium ATPase
Phatr3_J42663	722	704	476	609	554	659	314	349	266	445	354	150	483	425	349	414	347	342	497	518	470	470	418	486	390	425	452	423	396	389	Predicted protein
Phatr3_EG02403	956	900	291	691	750	762	686	676	656	877	831	471	847	851	807	829	698	877	1469	1348	1418	1688	1548	1431	1114	984	975	1336	1207	1270	NA
Phatr3_EG01821	11	10	9	5	7	11	10	15	3	12	19	5	5	14	8	10	16	12	21	10	7	10	5	6	19	15	17	2	9	8	NA
Phatr3_J31704	374	275	224	300	297	266	569	582	483	531	539	234	280	298	366	299	263	267	236	290	286	189	199	238	419	308	316	221	201	190	Predicted protein
Phatr3_EG01809	21	30	0	18	11	30	14	15	28	30	22	8	11	11	21	22	11	19	33	26	17	38	37	34	63	27	39	40	20	26	NA
Phatr3_EG02479	0	0	0	0	0	0	0	0	0	0	0	0	0	0	0	0	0	0	0	0	0	0	0	0	0	0	0	0	0	0	NA
Phatr3_EG02434	345	336	37	268	279	277	494	511	470	501	527	327	387	398	425	441	355	325	504	511	494	588	496	538	503	470	571	451	420	479	NA
Phatr3_J42668	274	245	94	286	249	270	267	280	273	381	326	133	241	258	229	270	229	275	224	161	184	272	217	241	205	197	220	166	196	165	Predicted protein
Phatr3_J5889	506	545	376	583	525	541	726	620	587	745	677	350	466	435	354	310	260	200	338	206	261	194	157	187	235	242	199	159	188	179	Predicted protein
Phatr3_J42670	299	303	44	309	313	252	206	219	169	259	256	126	295	348	307	280	227	273	533	544	480	532	485	440	366	357	326	388	445	406	Predicted protein
Phatr3_J42671	156	159	43	205	123	197	130	125	92	143	129	64	30	36	44	36	26	22	33	17	28	23	6	8	27	21	20	10	23	19	Predicted protein
Phatr3_J42672	375	356	237	225	296	274	514	469	476	498	492	307	367	395	321	358	307	336	404	417	441	480	426	447	195	214	192	412	342	392	Predicted protein
Phatr3_J42673	1126	1020	824	973	951	1184	1457	1253	1293	1400	1304	701	972	1221	905	1148	1109	1166	1316	1311	1382	1963	1774	1786	997	890	1153	1456	1384	1500	NA
Phatr3_J31713	102	84	20	51	68	68	190	199	195	239	233	129	135	218	132	193	160	184	258	257	224	313	242	221	211	167	167	232	235	246	Predicted protein
Phatr3_J8658	859	792	699	724	684	684	749	843	809	878	795	411	855	1113	987	971	875	886	1021	1057	977	1087	1044	914	1215	999	972	935	1029	984	Predicted protein
Phatr3_J42675	577	459	197	523	449	513	418	375	369	514	429	182	603	606	526	490	504	486	612	575	620	755	692	702	616	562	499	630	652	547	Predicted protein
Phatr3_J42676	152	174	235	140	160	122	86	95	95	108	74	66	201	227	211	104	66	88	679	867	694	181	174	208	1789	1229	1131	124	193	132	Predicted protein
Phatr3_J42677	789	709	166	625	497	624	336	365	425	395	384	290	513	411	372	378	348	360	539	552	544	586	547	575	510	486	463	510	523	508	Predicted protein
Phatr3_J31718	445	468	145	300	454	411	1043	976	1006	1256	1103	744	1364	1642	1442	1595	1562	1795	2973	3014	2829	3943	3305	3178	1896	1631	1703	2776	2909	2987	Inosine-5'-monophosphate dehydrogenase
Phatr3_J53967	109	84	15	129	149	144	33	41	31	33	34	21	15	12	20	14	24	16	18	13	6	3	21	16	5	4	7	16	9	15	Predicted protein
Phatr3_J9164	467	417	781	487	400	514	170	167	188	269	219	113	213	179	157	186	149	162	275	282	347	313	287	357	219	264	239	243	238	226	Thioredoxin	TRX-O
Phatr3_J42680	92	71	93	83	83	65	14	9	37	28	18	9	30	37	29	23	16	10	103	65	78	94	60	84	60	53	72	57	74	74	Predicted protein
Phatr3_J31722	186	143	85	175	127	131	116	123	108	160	175	86	97	92	97	73	89	102	130	164	118	146	172	151	250	160	189	143	128	91	Predicted protein
Phatr3_J9251	590	528	242	491	437	430	828	894	622	753	791	344	546	606	634	512	446	447	709	628	606	575	552	520	762	617	640	449	565	526	Predicted protein
Phatr3_J17401	1454	1404	678	1153	1246	1290	1788	2062	1799	2220	2066	1005	1027	997	904	1042	906	1000	1116	1021	1066	1227	1234	1189	979	771	776	947	1078	1035	Dihydrolipoamide acetyltransferase	DHLTA_1
Phatr3_J31725	292	239	181	172	220	210	256	272	255	356	365	175	297	395	323	383	364	421	1073	998	995	1489	1231	1041	800	656	621	986	985	991	Predicted protein
Phatr3_J42683	322	277	93	283	240	239	138	169	165	225	206	101	153	177	146	213	175	161	177	94	102	229	246	241	69	67	35	210	217	178	Phosphoinositide phospholipase C	PLC-DELTA
Phatr3_J1550	461	414	616	397	306	356	237	227	162	277	279	142	277	242	189	238	207	251	291	231	180	326	322	351	96	107	81	304	306	261	NA
Phatr3_J42685	65	83	20	84	58	75	41	33	36	46	50	28	51	33	52	58	44	42	40	37	42	70	63	39	37	36	27	45	54	75	NA
Phatr3_J42686	45	37	17	31	31	27	13	14	12	21	21	18	25	20	26	32	29	17	23	38	27	35	24	22	22	24	14	31	32	28	Predicted protein
Phatr3_J42687	633	494	169	423	398	475	450	462	379	539	483	265	440	492	457	460	469	557	553	527	571	610	571	601	640	540	540	496	447	519	NA
Phatr3_J31731	690	554	369	419	460	451	189	227	256	329	331	208	365	393	402	510	361	504	719	781	769	1077	1053	929	426	338	332	773	823	736	Predicted protein
Phatr3_EG02466	758	644	100	750	578	694	519	462	526	671	549	323	16	20	13	25	7	15	16	5	10	17	13	26	7	11	19	15	9	10	NA
Phatr3_J42689	4161	3390	1238	2605	2696	3147	3000	2734	2476	3876	3719	1536	3125	3869	3449	3775	4218	4388	4205	3680	4036	4639	4592	3910	3645	3001	3145	4451	4027	3600	Predicted protein
Phatr3_J42690	405	342	130	303	334	295	178	210	183	264	297	119	233	342	304	292	264	283	442	393	385	558	522	392	424	290	352	441	479	427	Predicted protein
Phatr3_J53969	1073	798	23	561	570	734	141	149	154	221	237	139	315	318	249	424	395	362	756	597	633	1139	1032	1105	337	221	322	1015	816	797	Predicted protein
Phatr3_J17408	1030	801	218	728	680	758	497	539	439	549	545	364	689	638	616	754	653	686	1086	987	841	1242	1197	1110	828	778	735	987	1048	1037	Predicted protein
Phatr3_J6915	411	364	108	270	217	273	55	35	77	103	76	58	142	101	92	60	72	65	300	230	256	234	251	248	224	174	164	195	151	159	Predicted protein
Phatr3_J42694	703	620	169	703	611	702	550	572	499	812	585	304	377	241	230	216	126	176	258	165	160	149	174	187	124	173	160	146	114	145	Predicted protein
Phatr3_J41667	440	322	159	299	321	307	309	330	295	378	323	149	265	319	265	301	265	223	314	324	301	380	377	398	281	263	267	337	343	344	Autophagy-related protein 3
Phatr3_J31740	228	211	114	235	200	229	137	151	151	184	144	99	89	76	68	77	90	71	72	56	63	72	71	53	55	52	39	45	74	40	Predicted protein
Phatr3_J31741	138	119	93	148	148	147	137	120	139	160	140	85	112	137	113	70	76	69	121	130	134	140	105	122	112	84	107	75	105	72	Predicted protein
Phatr3_J8976	1492	1312	1323	1104	1149	1120	1771	1651	1378	2022	1923	943	1613	1445	1348	1539	1462	1442	2357	2189	2128	2616	2410	2142	1495	1273	1310	1932	2268	2165	Predicted protein
Phatr3_EG02477	17385	15489	12861	13984	14040	12848	19424	16661	17035	23324	21823	12563	19958	18223	18012	20460	17739	17719	24215	24786	24266	31648	30244	26501	18922	18275	17086	23388	28620	26283	40S ribosomal protein S8
Phatr3_J42697	2413	2036	770	1330	1404	1383	356	372	475	408	382	267	1414	1289	1122	1226	954	946	1897	1843	1930	2193	2087	2080	1500	1286	1261	1759	1979	1721	Predicted protein
Phatr3_J42698	289	288	34	237	194	239	290	294	304	354	347	192	172	171	151	269	225	323	112	119	97	254	247	190	73	88	64	218	232	247	Predicted protein
Phatr3_J42699	269	304	38	342	238	373	229	247	274	307	234	131	158	119	71	75	58	74	132	76	113	111	86	98	211	168	193	57	103	75	Predicted protein
Phatr3_J24547	691	682	220	669	692	709	409	393	394	389	397	265	527	511	423	482	456	435	643	593	654	816	693	757	598	621	675	628	573	716	Predicted protein
Phatr3_J31748	560	432	299	399	362	366	256	196	196	249	233	140	386	330	256	268	215	254	413	443	384	426	409	390	332	320	259	333	374	353	Predicted protein
Phatr3_J42701	263	285	111	306	235	331	374	409	345	456	357	179	194	206	205	172	117	131	212	126	187	140	126	167	176	163	144	129	120	123	Predicted protein
Phatr3_EG02470	395	342	110	465	308	356	1143	1210	1018	1219	1030	607	381	653	661	312	425	409	101	262	199	79	76	48	618	381	421	82	84	32	Predicted protein
Phatr3_J9200	961	1019	565	1104	896	1081	815	825	763	1027	988	548	667	698	669	631	617	589	893	783	808	929	847	842	1047	719	749	688	708	671	Predicted protein
Phatr3_EG02473	243	213	25	242	188	216	276	219	238	263	266	114	240	232	240	180	196	223	204	264	220	214	184	244	278	235	248	189	212	203	NA
Phatr3_J31753	93	97	39	92	89	90	64	35	47	71	60	26	60	38	46	53	36	26	71	98	77	65	66	67	76	73	91	57	45	51	Predicted protein
Phatr3_EG02172	540	566	0	538	409	625	639	720	673	754	637	354	296	235	200	130	123	131	311	256	257	42	25	33	1075	656	702	40	39	30	Predicted protein
Phatr3_EG02178	598	588	302	728	556	635	748	763	685	841	714	303	299	362	258	157	166	146	453	357	293	46	34	64	1027	829	802	37	43	50	NA
Phatr3_J9277	79	69	0	99	43	81	34	29	36	39	42	20	30	34	20	39	12	17	28	29	26	37	36	31	27	34	39	30	17	21	Predicted protein
Phatr3_J42708	60	64	20	98	101	89	14	14	7	7	11	6	15	9	15	15	14	12	28	27	33	24	20	19	43	24	20	26	16	26	Predicted protein
Phatr3_J9547	433	385	193	388	331	389	170	141	209	198	168	106	292	197	186	247	179	230	275	239	290	278	310	318	224	221	205	270	258	250	Predicted protein	RFC4
Phatr3_J8720	2580	2633	4218	2298	2343	2124	2418	2126	2262	3090	3035	1819	5658	5523	5510	4647	4362	4467	5457	6286	5736	5463	5120	4524	7130	5902	5938	4456	5153	4857	Predicted protein
Phatr3_EG01773	2524	2293	2638	2345	2254	2141	2223	1929	1792	2987	2714	1521	5468	5086	5170	4125	3834	3950	6554	6760	6249	5571	4883	4637	7352	6177	5910	4030	5028	4722	NA
Phatr3_J9427	130	112	67	105	111	87	103	76	99	121	103	48	161	148	151	148	117	104	131	139	146	153	121	113	105	111	129	116	133	113	Udp-n-acetylglucosamine transferase subunit alg13
Phatr3_J9490	327	283	93	227	235	235	98	85	111	168	151	124	412	481	380	540	511	558	263	283	213	442	457	406	229	133	140	390	336	424	Predicted protein
Phatr3_J42712	2410	2106	3725	1738	1876	1764	2425	2198	1852	2947	2807	1416	3370	3420	3490	4016	3451	3420	3252	3374	3388	4070	3980	3785	2609	2387	2337	3343	3773	3675	Predicted protein
Phatr3_J31763	358	347	328	282	295	303	243	335	276	366	328	180	401	539	481	492	427	448	447	494	457	488	478	426	501	454	352	397	437	415	Predicted protein
Phatr3_J31764	141	105	44	94	99	108	121	101	83	111	122	50	146	138	134	142	110	136	200	154	140	171	137	170	219	141	133	162	150	159	Predicted protein
Phatr3_J8686	16563	16415	31581	15563	14046	13302	21006	18075	15698	24742	23322	12008	19463	15877	15699	16766	15141	14676	22025	20397	20325	26404	26517	22123	16922	14573	14212	18876	25741	20997	40S ribosomal protein S12
Phatr3_EG02471	724	593	193	529	480	516	376	469	375	509	528	220	497	567	467	536	529	547	843	749	725	976	967	882	750	531	567	852	831	803	Predicted protein
Phatr3_J6927	713	739	136	733	654	744	651	628	714	748	661	357	564	617	563	510	472	451	755	743	717	801	853	691	868	630	611	662	643	698	Predicted protein
Phatr3_J31768	613	588	487	485	467	378	582	561	561	732	821	394	634	694	761	720	550	674	736	929	755	926	811	821	820	688	621	805	810	787	Elongation factor Ts, mitochondrial
Phatr3_J6258	270	197	112	141	163	162	370	384	378	485	575	228	646	811	666	1044	985	1096	2196	1796	1745	2958	2518	2187	1149	837	897	2306	2255	2221	Predicted protein
Phatr3_J8940	425	399	305	475	326	433	103	115	128	163	114	86	153	152	119	116	82	124	84	52	59	109	75	124	5	28	32	70	81	96	Peptidyl-prolyl cis-trans isomerase
Phatr3_J9011	451	409	194	452	399	352	543	664	531	620	599	298	448	434	415	401	316	328	348	357	293	288	294	294	371	375	312	221	267	237	Peptidyl-prolyl cis-trans isomerase
Phatr3_J31772	90	53	13	72	36	47	77	70	69	55	54	46	53	58	78	36	32	28	57	56	63	35	23	19	102	123	121	9	26	29	Predicted protein
Phatr3_J42720	376	357	191	359	308	290	275	289	268	370	268	148	397	462	301	327	322	381	330	305	338	452	394	425	337	299	338	362	316	395	NA
Phatr3_J42721	1265	1073	292	811	870	1019	449	284	445	523	502	219	942	826	680	697	569	574	1115	960	1207	1157	1034	1199	950	1024	1222	974	973	993	Predicted protein
Phatr3_J42722	489	531	303	487	319	486	688	733	631	792	778	381	241	247	214	211	216	180	211	181	214	213	201	270	98	102	94	175	136	147	Predicted protein
Phatr3_EG02478	100	100	99	137	101	103	51	45	55	86	63	37	20	23	27	19	15	14	23	6	12	14	6	9	15	15	12	11	5	13	Predicted protein
Phatr3_EG02480	50	24	145	38	44	56	25	22	33	37	20	7	12	16	16	14	14	8	15	15	13	7	6	10	16	5	11	9	8	17	NA
Phatr3_EG02433	651	567	294	564	486	519	1757	1623	1357	1777	1621	708	501	557	536	467	476	497	320	316	321	263	282	385	375	372	320	319	273	237	NA
Phatr3_J1784	465	468	345	672	608	656	320	324	277	326	271	172	75	50	74	86	91	92	23	6	13	16	24	20	20	35	24	21	45	15	Predicted protein
Phatr3_J31778	395	312	226	431	442	388	355	460	321	397	414	227	253	291	261	303	299	306	140	132	136	156	125	126	153	149	146	121	144	115	Predicted protein
Phatr3_J8717	545	516	639	563	586	478	401	358	380	413	401	248	542	486	469	349	299	333	687	739	703	533	512	579	958	969	891	440	439	479	Serine hydroxymethyltransferase
Phatr3_J42726	1470	1218	549	958	906	1144	15	27	34	39	45	32	376	226	200	385	227	221	1255	1007	1156	1703	1652	1980	483	675	711	1260	1175	1297	Ribonucleoside-diphosphate reductase
Phatr3_J31781	118	75	55	75	51	42	6	9	11	15	19	4	35	18	13	32	18	16	54	39	47	80	88	70	29	30	34	47	95	41	Predicted protein
Phatr3_J3362	1556	1489	976	995	1206	1089	1244	1322	1150	1479	1439	711	2502	3015	2865	2464	2326	2649	4209	4926	4829	4880	4534	3896	5513	4349	4701	4148	4428	4431	Predicted protein
Phatr3_J8950	4644	4139	6256	4220	4160	3964	3189	3180	3215	2985	2749	1400	5972	7625	6910	6027	5613	5675	4276	4695	4787	5459	4969	4963	5152	5152	5053	4988	5720	5605	Predicted protein
Phatr3_EG01868	0	0	0	0	0	0	0	0	0	0	0	0	0	0	0	0	0	0	0	0	0	0	1	0	0	0	0	0	0	0	NA
Phatr3_J42729	381	305	95	327	277	353	188	190	174	310	245	140	242	245	230	342	260	273	431	393	414	567	529	533	288	254	276	471	444	406	Ubiquitin carboxyl-terminal hydrolase
Phatr3_EG02463	990	838	342	778	712	832	872	823	732	933	891	490	789	805	850	895	777	856	807	832	832	909	813	811	1023	791	834	733	747	763	Predicted protein
Phatr3_J8657	361	282	36	264	292	283	210	177	220	218	253	122	193	158	127	105	91	92	199	171	151	129	137	151	232	225	193	102	109	96	NA
Phatr3_J42732	149	171	89	124	176	143	23	23	24	36	62	15	90	72	67	60	37	24	123	116	101	85	82	83	86	73	62	72	82	58	Predicted protein
Phatr3_J9040	965	931	384	1045	1028	1252	231	241	280	367	343	178	1298	1346	1165	1031	992	1081	912	1091	1160	992	809	1038	1588	1665	1741	1050	947	962	Zeta-carotene desaturase	ZDS
Phatr3_J9255	1063	976	414	797	855	829	623	670	616	831	738	431	1113	1100	973	1225	1032	1098	1580	1614	1606	2262	1816	1590	1481	1166	1127	1497	1679	1648	Elongation of fatty acids protein
Phatr3_J42734	238	264	98	344	243	300	317	328	399	392	375	196	275	297	256	90	90	113	245	229	217	128	93	148	394	313	367	97	82	107	NA
Phatr3_J42735	454	402	209	332	279	355	1329	1326	1024	1405	1331	522	498	627	491	450	432	436	776	741	682	799	730	551	1042	605	687	608	601	550	Predicted protein
Phatr3_EG02467	947	886	1026	860	930	881	1479	1302	1379	1473	1347	644	917	1090	990	972	837	750	670	840	778	597	533	523	897	828	751	582	657	497	Predicted protein
Phatr3_J3527	307	318	158	339	250	338	276	235	201	266	274	121	347	363	353	244	211	209	729	713	724	453	429	368	761	764	776	384	388	398	NA
Phatr3_EG02468	384	425	284	433	325	425	421	486	347	452	458	184	203	209	214	207	150	202	231	209	245	224	161	202	215	161	177	139	156	150	Predicted protein
Phatr3_EG02476	308	334	228	330	239	302	627	729	563	690	569	278	346	450	458	309	312	266	244	236	230	119	143	145	373	317	302	114	105	98	Predicted protein
Phatr3_J42740	308	223	10	242	224	268	203	275	183	218	205	93	221	217	175	192	164	150	195	184	166	173	197	207	179	149	134	193	160	171	Predicted protein
Phatr3_EG02469	438	381	109	325	315	356	149	132	110	147	158	88	240	228	167	189	136	163	259	228	273	373	309	359	185	186	206	280	274	276	Predicted protein
Phatr3_J42742	2548	2517	5177	3028	2850	2743	2398	2093	1523	2304	2113	1051	2274	2286	2091	1805	1797	1399	1206	1084	1196	976	1108	1039	1356	1451	1289	1021	1067	952	Predicted protein
Phatr3_J42743	347	372	5	240	232	346	54	38	62	50	65	32	194	124	87	130	77	89	227	184	160	235	148	261	171	174	183	211	184	216	Predicted protein
Phatr3_EG01876	0	0	0	0	0	0	0	0	0	0	0	0	0	0	0	0	0	0	0	0	0	0	0	0	0	0	0	0	0	0	NA
Phatr3_J42744	232	184	203	309	205	216	201	210	221	276	244	114	67	75	49	39	34	21	11	8	15	23	18	25	14	20	13	17	12	11	Predicted protein
Phatr3_J8917	339	313	139	424	316	364	328	310	271	327	391	153	251	197	185	111	107	109	130	127	130	74	90	104	159	137	140	85	115	92	Predicted protein
Phatr3_J42746	131	156	0	152	115	143	48	51	36	58	50	26	17	15	8	12	11	5	3	2	0	1	1	4	2	0	0	3	0	5	Predicted protein
Phatr3_J24610	12598	11160	7670	11373	9772	10734	2288	1789	2658	3552	3153	1802	1741	1273	893	2906	2222	2021	108	71	80	537	379	639	66	113	92	434	502	497	Triose phosphate/phosphate translocator	TPT1
Phatr3_EG01852	2935	2438	2088	2204	1916	1950	2646	2466	2270	2700	2593	1391	1534	1819	1801	1442	1312	1610	1352	1322	1225	1359	1346	1306	979	936	874	1133	1242	1215	NA
Phatr3_J9266	63	62	64	71	61	65	424	538	324	331	300	107	44	105	74	71	87	65	28	24	37	10	15	18	62	28	45	11	12	17	Predicted protein
Phatr3_J42749	1130	912	560	858	725	912	614	632	593	779	719	391	580	426	438	647	538	600	586	407	454	665	645	625	200	183	206	603	577	513	Predicted protein
Phatr3_J42750	431	412	218	254	287	364	35	34	34	49	83	43	183	170	134	269	175	194	469	379	340	637	596	533	197	142	154	446	460	516	Predicted protein
Phatr3_EG02465	536	503	165	468	368	426	287	227	210	404	384	194	222	225	263	382	332	313	270	248	204	323	360	319	214	128	124	291	318	346	Predicted protein
Phatr3_EG02475	611	604	109	589	464	513	419	346	393	449	467	245	312	316	219	269	228	213	373	283	289	342	325	318	225	214	215	253	307	281	Predicted protein
Phatr3_EG02481	499	363	0	272	203	372	305	361	349	353	328	207	261	196	184	245	178	295	490	373	391	495	435	425	571	311	311	385	317	371	Predicted protein
Phatr3_EG02472	881	785	304	837	674	771	591	607	491	791	690	342	511	520	429	455	418	442	845	745	716	834	754	694	822	515	551	644	773	674	NA
Phatr3_J31810	442	427	388	483	468	420	719	748	533	795	679	396	520	484	465	392	357	307	193	264	214	217	178	221	262	277	255	147	185	181	Predicted protein
Phatr3_J31811	1587	1441	1334	1257	1401	1223	518	403	453	656	585	358	1323	1406	1331	1364	1258	1295	1865	1978	1970	1976	1706	1659	2089	1696	1580	1568	1658	1660	Predicted protein
Phatr3_J41676	1543	1294	1533	1318	1248	1245	244	193	211	448	442	268	4972	5768	5743	1801	1764	1796	4647	5429	5159	1094	969	1016	6640	6966	6792	1140	1099	1218	Nucleoside diphosphate kinase	NDK1
Phatr3_J42754	1113	1086	846	1022	919	1161	807	707	641	1010	936	440	949	952	858	864	806	870	1332	1281	1225	1379	1255	1328	1145	996	994	1113	1117	1136	Predicted protein
Phatr3_J42755	1272	1173	166	947	1024	1050	3079	2903	3150	3532	3264	1724	3216	3361	3258	2787	2472	2959	3596	3490	4048	3748	3285	3883	3732	3860	3663	3199	3331	3723	Predicted protein
Phatr3_EG01783	0	0	0	0	0	0	0	0	0	0	0	0	0	0	0	0	0	0	0	0	0	0	0	0	0	0	0	0	0	0	NA
Phatr3_J31815	0	0	0	0	1	0	0	4	0	0	0	0	0	0	0	0	0	0	0	0	0	0	0	0	0	0	0	0	0	0	Predicted protein
Phatr3_EG01861	0	0	0	0	0	0	0	0	0	0	0	0	0	0	0	0	0	0	0	0	0	0	0	0	0	0	0	0	0	0	NA
Phatr3_J31816	125	85	35	74	51	88	102	130	128	101	129	40	63	71	56	78	58	96	81	103	82	113	79	160	126	116	87	122	73	96	Predicted protein
Phatr3_J42756	703	611	355	607	501	525	578	700	746	734	686	301	331	384	345	337	306	283	412	400	403	438	432	424	440	348	356	364	384	422	NA
Phatr3_J42757	3206	2572	2665	2294	2274	2276	6216	6874	4920	6749	6444	2982	5129	5787	5264	4648	4548	4739	3928	4531	4469	4178	3674	3959	4528	4020	4100	3569	3718	3654	Predicted protein
Phatr3_J31819	165	119	127	100	98	143	170	219	158	245	171	140	99	175	110	126	123	140	183	221	196	221	166	176	199	167	165	137	154	156	Predicted protein
Phatr3_J42758	1396	1180	325	1211	1064	1292	723	616	581	810	874	403	799	827	724	958	866	908	1101	1034	1011	1401	1336	1196	985	822	836	1120	1106	1016	NA
Phatr3_J8772	764	617	82	454	564	662	562	460	563	771	750	413	1616	1796	1416	1851	1752	2040	446	447	376	1254	1077	1075	304	350	320	1155	1129	1116	Predicted protein
Phatr3_EG01875	0	0	0	0	0	0	2	0	0	0	0	0	0	0	0	0	0	0	0	0	0	0	0	0	0	0	0	0	0	0	NA
Phatr3_J31822	61	49	21	69	85	62	153	157	108	204	212	141	76	100	100	101	113	92	12	20	24	40	34	51	9	9	14	47	38	38	Predicted protein
Phatr3_J17487	1289	1204	681	764	1085	1017	2710	2496	2730	3766	3688	2155	4215	4595	4543	5198	5188	5666	3244	4050	4214	5193	4260	4766	3026	2710	2787	4450	4317	4792	Oxidoreductase
Phatr3_J8993	565	557	366	479	467	448	706	685	660	778	813	386	695	705	684	737	631	738	613	661	711	788	679	682	580	516	523	654	763	654	Predicted protein
Phatr3_EG01853	61	43	0	140	111	187	43	59	49	237	258	123	56	68	85	278	320	338	65	40	50	227	289	250	56	28	31	209	213	171	NA
Phatr3_J42762	193	181	39	206	173	197	231	221	197	266	253	127	197	269	227	240	358	355	280	240	269	300	276	332	238	188	211	308	299	284	Predicted protein
Phatr3_J6580	272	250	186	238	263	256	115	77	89	117	131	79	133	80	89	85	86	109	82	63	60	94	105	77	28	18	25	74	73	68	Predicted protein
Phatr3_J31827	390	328	129	315	266	355	399	330	338	382	394	205	204	210	184	154	139	164	160	133	149	107	138	193	51	127	96	114	139	113	Predicted protein
Phatr3_J42763	542	427	131	345	448	399	134	130	157	202	239	120	262	255	172	281	241	227	211	197	199	336	295	370	108	136	124	332	291	272	Predicted protein
Phatr3_J6934	766	622	126	476	524	532	348	370	380	431	419	207	667	791	586	871	715	857	1502	1337	1443	2162	1835	1656	1129	833	858	1787	1740	1644	Predicted protein
Phatr3_J9609	2440	2253	1362	1997	1932	1968	1846	1950	2003	2196	2069	1122	1285	1425	1385	1734	1565	1631	1391	1247	1463	2053	1853	1734	1094	1041	949	1443	1725	1596	Predicted protein
Phatr3_J9078	2953	2576	4026	3404	2566	2720	777	622	652	756	767	393	3789	4996	4897	609	498	455	6216	9327	8820	208	207	282	20441	20447	20205	223	241	221	Predicted protein
Phatr3_J31831	255	242	908	333	230	278	251	220	166	303	253	126	318	296	276	248	228	170	348	333	279	291	219	222	490	398	387	193	261	236	Centrin-like protein
PTsRNA00017a	0	0	0	0	0	0	0	0	0	0	0	0	0	0	0	0	2	0	0	0	0	0	0	2	0	0	0	0	0	0	NA
EPrPhatr3G00000013130	0	0	0	0	0	0	0	0	0	0	0	0	0	0	0	0	0	0	0	0	0	0	0	0	0	0	0	0	0	0	NA
PTsRNA00023b	0	0	0	0	0	0	0	0	0	0	0	0	0	0	0	0	0	0	0	0	0	0	0	0	0	0	0	0	0	0	NA
PTsRNA00023a	0	0	0	0	0	0	0	0	0	0	0	0	0	0	0	0	0	0	0	0	0	0	0	0	0	0	0	0	0	0	NA
Phatr3_J8670	1472	1371	624	1390	1705	1698	4019	4201	3859	3952	3298	1600	3763	4968	4176	2109	1801	2316	3234	4485	4118	1166	1029	1169	8161	8638	8843	1175	1141	1307	Predicted protein
Phatr3_J42767	430	381	248	468	287	402	943	937	607	973	939	412	365	592	557	397	456	410	376	520	450	266	237	221	827	521	609	188	209	198	Predicted protein
Phatr3_J31834	535	407	296	325	368	365	6	10	20	44	38	20	668	739	686	673	475	591	444	580	493	456	456	508	903	770	714	517	493	512	Predicted protein
Phatr3_J31835	78	54	16	56	49	40	3	4	0	9	10	10	29	38	14	39	28	14	12	1	6	10	9	16	4	11	6	9	13	10	Predicted protein
PTsRNA00023c	0	0	0	0	0	0	0	0	0	0	0	0	0	0	0	0	0	0	0	0	0	0	0	0	0	0	0	0	0	0	NA
EPrPhatr3G00000013122	0	0	0	0	0	0	0	0	0	0	0	0	0	0	0	0	0	0	0	0	0	0	0	0	0	0	0	0	0	0	NA
PTsRNA00023d	0	0	0	0	0	0	0	0	0	0	0	0	0	0	0	0	0	0	0	0	0	0	0	0	0	0	0	0	0	0	NA
EPrPhatr3G00000013120	11	17	7	20	17	13	1	1	3	5	5	2	6	5	1	1	4	1	4	5	9	0	2	2	5	7	5	1	1	6	NA
Phatr3_J42768	305	268	106	254	253	283	71	86	89	113	109	84	87	58	67	95	77	85	147	116	125	213	201	210	53	90	79	192	193	165	Predicted protein
Phatr3_EG01817	0	0	0	0	0	0	0	0	0	0	0	0	0	0	0	0	0	0	0	0	0	0	0	0	0	0	0	0	0	0	NA
Phatr3_EG01764	221	198	36	214	166	144	181	188	167	152	133	61	205	217	215	192	145	173	295	243	309	274	276	248	370	306	300	165	317	244	NA
Phatr3_J42770	683	528	401	642	517	590	213	171	135	215	280	96	171	209	162	147	150	170	299	196	243	213	244	301	232	211	235	188	175	177	Predicted protein
Phatr3_J17495	1350	1255	631	1477	1435	1573	624	603	523	731	771	309	717	661	552	626	618	573	742	579	705	690	720	782	771	543	684	679	704	605	Bifunctional 6-phosphofructo-2-kinase	PF2K1
Phatr3_J31840	214	244	61	198	249	241	496	411	383	441	398	236	311	335	325	284	273	284	370	382	361	349	271	258	481	352	321	278	289	261	Dihydrolipoamide transferase
Phatr3_J31841	117	98	100	78	100	68	232	224	158	279	296	113	298	326	375	241	308	307	498	602	537	558	504	379	375	332	274	444	412	425	Predicted protein
Phatr3_J7349	1113	955	673	843	988	845	943	764	697	1111	1044	616	1129	1171	1118	1378	1292	1293	1715	1871	1902	2268	2078	1917	1118	978	986	1739	1778	1999	Predicted protein
Phatr3_J8945	592	520	102	627	534	610	404	432	516	572	462	262	80	99	112	104	135	76	301	271	282	288	358	335	105	113	103	199	243	208	Aminotransferase
Phatr3_J42774	674	594	702	551	521	557	456	443	496	636	593	305	544	510	468	415	324	376	528	542	500	526	523	557	336	419	427	411	409	369	Predicted protein
Phatr3_J17504	3848	3570	2046	3180	3843	3919	4618	4406	4000	4585	4051	1964	10492	13769	11535	4986	4111	4210	16432	21847	22334	5306	4607	5128	38665	42086	44849	4533	4565	5194	Predicted protein
Phatr3_J31846	636	600	468	674	550	507	1662	1484	1426	1527	1391	709	773	1232	1111	862	885	1120	508	589	514	190	199	158	1290	1026	1153	181	216	176	Predicted protein
Phatr3_EG01835	0	0	0	0	0	0	0	0	0	0	0	0	0	0	0	0	0	0	4	2	0	0	1	0	2	2	4	2	1	0	NA
Phatr3_J42776	486	429	45	416	372	495	397	377	357	421	472	249	518	682	555	678	699	731	492	431	475	767	618	724	513	494	543	672	548	575	Predicted protein
Phatr3_J1358	758	753	239	727	687	759	695	651	663	748	726	386	433	411	420	355	329	424	441	408	430	568	492	464	393	332	332	456	499	413	Predicted protein
Phatr3_J42778	734	713	205	946	819	952	760	754	701	862	791	379	485	549	563	435	337	486	461	478	442	344	297	321	604	575	595	274	339	309	Predicted protein
Phatr3_J42779	463	450	196	955	685	871	939	1118	841	1073	919	361	510	698	790	378	551	516	132	132	159	76	60	85	408	264	328	92	110	89	Predicted protein
Phatr3_EG01761	355	315	417	532	403	358	186	124	112	149	136	79	101	104	68	58	54	48	75	63	45	19	25	16	143	126	111	22	13	18	NA
Phatr3_J42781	571	530	530	561	439	519	354	353	276	470	400	205	369	345	325	373	298	395	381	448	459	454	468	480	333	331	362	456	433	367	Predicted protein
Phatr3_EG02459	458	406	397	635	415	546	284	187	317	326	307	143	87	71	56	38	58	47	21	1	1	3	8	18	5	6	5	1	11	1	NA
Phatr3_EG02460	1342	1284	788	1197	1144	1156	992	1097	999	1242	1110	609	709	713	668	1172	1078	1159	231	174	146	494	481	532	142	111	96	463	490	456	NA
Phatr3_EG02174	38867	36651	57119	36786	33342	33035	12950	11520	13009	19031	18085	10365	2989	2348	2095	11661	9541	10177	191	162	148	1964	2004	2250	115	99	101	1928	1961	1975	NA
Phatr3_J53980	50	54	95	103	55	57	154	142	147	185	175	70	13	16	30	31	64	36	9	4	7	35	22	26	2	7	8	32	25	18	Gelsolin	GEL1
Phatr3_J9171	856	724	879	694	731	728	744	790	696	758	766	358	565	531	548	608	482	506	421	291	394	483	432	484	215	252	270	409	407	415	Predicted protein
Phatr3_J42786	1153	1121	370	1110	856	1049	1375	1198	1263	1068	1180	683	630	644	599	1005	873	907	258	167	147	472	499	529	154	89	56	370	370	390	Predicted protein
Phatr3_J42787	1146	982	162	836	737	865	444	342	453	628	525	323	419	291	288	610	498	522	13	13	19	72	109	113	1	1	2	100	70	90	Predicted protein
Phatr3_J31861	83	64	22	50	49	85	89	68	82	98	99	46	51	58	65	124	76	79	57	28	44	72	72	65	48	53	35	88	84	80	Predicted protein
Phatr3_J42788	3428	3093	4789	2517	2441	2698	909	769	856	1105	965	507	2300	1907	1443	1894	1570	1513	2713	2274	2557	3381	3240	3368	1574	1704	1673	2588	3084	2944	Predicted protein
Phatr3_J9475	359	288	119	292	246	260	133	165	139	194	193	85	171	173	154	210	213	194	398	353	349	514	437	484	248	212	259	384	404	393	Predicted protein	APC3
Phatr3_J42790	2697	2421	3001	2473	2385	2281	521	391	525	601	570	339	1066	996	931	787	626	568	640	595	609	464	349	478	1044	1042	1062	393	413	434	Predicted protein
Phatr3_J42791	761	707	172	817	743	934	740	733	651	776	717	361	768	698	679	471	353	370	420	395	482	145	122	164	846	889	803	180	173	188	Predicted protein
Phatr3_J31866	678	605	889	613	559	501	596	597	546	758	635	291	497	435	426	480	423	360	482	606	499	562	557	471	446	454	407	458	441	456	Predicted protein
Phatr3_J9147	159	150	27	99	123	136	115	155	126	141	144	76	91	107	87	117	116	81	118	107	86	112	155	130	66	46	60	68	118	95	Predicted protein
Phatr3_J42793	1082	902	504	741	633	819	360	309	398	442	437	183	586	518	464	564	452	415	817	658	667	995	879	842	502	318	338	716	856	748	NA
Phatr3_J42794	304	310	18	198	247	283	221	226	264	241	202	139	246	378	285	311	266	281	370	387	317	539	365	515	271	315	262	423	408	401	Predicted protein
Phatr3_EG01860	0	0	0	0	0	0	0	0	0	0	0	0	0	0	0	0	0	0	0	0	0	0	0	0	0	0	0	0	0	0	NA
Phatr3_J31870	276	272	148	216	209	223	208	194	145	257	223	112	266	305	280	321	230	207	333	389	355	370	317	379	320	351	345	294	315	285	Predicted protein
Phatr3_J17519	3	0	0	3	1	1	9	6	4	6	7	2	3	6	3	2	6	5	10	5	2	5	2	7	7	7	6	3	3	6	Predicted protein
Phatr3_EG01864	4	1	0	0	3	2	5	4	3	10	6	1	8	8	3	6	3	15	17	20	14	21	32	17	14	12	3	6	24	9	NA
Phatr3_J17523	512	467	308	351	492	392	617	595	471	598	480	288	678	818	691	687	603	649	1093	1290	1283	1218	1225	1039	1326	1279	1263	986	989	1085	Predicted protein
Phatr3_J9233	0	0	0	0	0	0	0	0	0	0	0	0	0	0	0	0	0	0	0	0	0	0	0	0	0	0	0	0	0	0	NA
Phatr3_EG01867	0	0	0	0	0	0	0	0	0	0	0	0	0	0	0	0	0	0	0	0	0	0	0	0	0	0	0	0	0	0	NA
Phatr3_J31874	0	0	0	0	0	0	0	0	0	0	0	0	0	0	0	0	0	0	0	0	0	0	0	0	0	0	0	0	0	0	Predicted protein
Phatr3_J31875	0	0	0	0	0	0	0	0	0	0	0	0	0	0	0	0	0	0	0	0	0	0	0	0	0	0	0	0	0	0	Gag-pol polyprotein
Phatr3_EG01748	0	0	0	0	0	0	0	0	0	0	0	0	0	0	0	0	0	0	0	0	0	0	0	0	0	0	0	0	0	0	NA
Phatr3_J31876	0	0	0	0	0	0	0	0	0	0	0	0	0	0	0	0	0	0	0	0	0	3	0	0	0	0	0	0	0	0	NA
Phatr3_J31877	0	0	0	0	0	0	0	0	0	0	0	0	0	0	0	0	0	0	0	0	0	0	0	0	0	0	0	0	0	0	Predicted protein
EPrPhatr3G00000013117	4	7	0	10	5	15	53	49	27	62	55	25	56	53	29	42	31	34	8	15	10	24	16	10	6	19	12	19	15	7	NA
Phatr3_J31878	377	360	297	636	489	530	282	259	241	330	260	106	114	62	64	36	47	42	25	23	32	13	14	9	39	37	30	18	19	27	Predicted protein
Phatr3_J31879	369	389	195	301	304	311	303	325	265	332	298	150	316	383	301	325	340	358	803	731	704	878	830	744	429	411	446	609	603	624	PP5/FYPP plant-like protein	PPP5
Phatr3_EG01824	698	544	438	576	498	499	454	354	380	412	364	206	360	373	290	357	317	274	391	329	368	365	383	389	188	310	314	306	285	340	NA
Phatr3_J42799	854	797	507	719	624	734	700	736	698	748	824	398	579	536	505	702	600	593	1137	1042	888	1175	1083	910	1160	824	814	872	1021	955	Predicted protein
Phatr3_J31881	0	2	0	0	0	2	0	0	0	0	0	0	1	0	0	0	0	0	1	0	0	2	0	0	0	0	0	1	0	0	Predicted protein
Phatr3_J8691	238	166	87	175	181	184	313	346	341	318	333	182	275	267	251	250	276	279	139	138	123	162	145	159	113	137	128	120	142	179	Predicted protein
Phatr3_J42800	342	285	214	257	214	287	135	130	125	235	221	74	177	141	117	227	251	214	49	40	27	105	81	120	8	40	23	103	92	64	Predicted protein
Phatr3_J17531	31759	28863	35367	28222	26167	26281	6365	4639	6241	10337	9718	5806	964	596	464	6618	5161	5108	68	30	59	671	644	809	27	19	15	621	625	572	Fucoxanthin chlorophyll a/c protein
Phatr3_J8747	1057	978	645	905	854	775	617	569	622	756	742	388	257	184	132	769	729	814	15	16	4	180	231	230	2	5	3	203	215	200	Predicted protein
Phatr3_J9246	1418	1048	733	897	940	1079	457	465	413	569	543	305	2191	2426	2394	2401	2287	2166	1571	1792	1829	2162	2007	2000	2129	1968	1971	1768	1828	1988	Predicted protein
Phatr3_J9601	694	609	361	571	564	532	572	558	467	638	582	299	357	342	299	371	335	329	203	195	214	305	275	316	189	125	196	207	243	240	Protein of f-actin capping protein
Phatr3_J31888	8	2	5	9	5	2	1	1	0	1	2	0	1	1	0	0	2	0	0	0	0	0	0	0	0	0	0	0	0	0	Predicted protein
Phatr3_EG01767	0	0	0	0	0	0	0	0	0	0	0	0	0	0	0	0	0	0	0	0	0	0	0	0	0	0	0	0	0	0	NA
Phatr3_J8859	763	693	239	695	488	639	411	440	383	529	506	257	383	328	292	351	321	333	673	494	464	679	639	540	443	261	259	535	572	458	Predicted protein
Phatr3_J9554	582	500	336	460	365	458	472	493	477	544	506	244	497	491	404	455	364	367	505	528	507	514	365	453	542	502	560	440	407	448	Predicted protein
Phatr3_J17545	803	710	7	422	462	547	814	711	722	994	901	587	897	866	701	898	657	816	868	1050	975	1047	854	1221	874	842	880	897	854	1019	40S ribosomal protein S3a
Phatr3_EG01886	1	0	0	0	1	0	1	0	0	0	6	0	0	0	2	2	1	0	5	1	1	3	1	2	0	1	0	0	2	1	NA
Phatr3_J42807	609	560	248	540	462	574	525	476	377	571	592	272	734	557	686	570	392	528	688	695	689	598	578	536	641	655	673	483	499	530	Predicted protein
Phatr3_J42808	387	366	89	313	282	341	176	99	99	183	193	73	269	320	323	306	346	322	274	259	287	306	282	335	180	193	201	326	278	306	Predicted protein
Phatr3_EG01816	0	0	0	0	4	0	0	0	0	0	5	1	0	2	0	0	2	0	1	1	1	0	3	0	1	3	1	1	0	4	NA
Phatr3_J42809	683	634	356	627	567	556	1183	1241	1173	1379	1192	657	798	1054	1128	867	894	965	749	800	739	693	639	528	1108	796	788	478	602	582	Predicted protein
Phatr3_J9020	115	111	32	121	76	93	65	47	59	58	78	43	47	31	32	43	32	41	50	30	54	64	97	102	14	11	7	49	34	58	Predicted protein
Phatr3_EG02411	485	412	95	435	318	362	319	235	332	310	277	160	313	297	290	241	204	233	365	353	363	403	273	308	416	358	388	307	322	267	Predicted protein
Phatr3_EG01839	0	0	0	0	0	0	0	0	0	0	0	0	0	0	0	0	0	0	0	0	0	0	0	0	0	0	0	0	0	0	NA
Phatr3_J31898	0	1	0	0	0	0	0	0	0	0	0	0	0	0	0	0	0	0	0	0	0	0	0	0	0	0	0	0	0	0	Predicted protein
Phatr3_EG01813	0	0	0	0	0	0	0	0	0	0	0	0	0	0	0	0	0	0	0	0	0	0	0	0	0	0	0	0	0	0	NA
Phatr3_J8996	785	845	2	739	698	968	1124	1440	1287	1439	1357	620	800	981	777	751	766	860	625	750	730	739	602	770	1327	945	903	698	586	689	NA
Phatr3_J31900	307	283	100	371	255	349	270	237	206	209	204	89	110	148	108	43	48	49	38	25	26	1	4	4	176	119	122	4	4	11	Predicted protein
Phatr3_EG01760	937	981	144	924	749	879	2049	2423	1823	2351	2147	1020	818	980	906	797	748	862	942	829	854	994	881	917	1060	699	712	734	849	808	NA
Phatr3_J42815	329	320	236	224	235	306	129	104	144	142	145	67	140	114	98	101	112	104	128	116	120	125	147	154	64	69	71	96	107	96	Predicted protein
Phatr3_J42816	814	770	384	850	893	763	320	266	344	408	367	204	353	370	304	286	281	196	340	304	298	369	296	344	239	233	231	285	311	285	NA
Phatr3_EG01881	347	255	141	270	257	213	251	232	198	296	224	122	284	232	195	189	165	165	194	233	206	174	197	247	198	155	168	164	170	191	NA
Phatr3_J42817	297	229	214	197	199	224	171	125	219	161	169	103	219	233	194	162	192	176	180	230	224	219	183	180	212	162	167	189	198	166	Predicted protein
Phatr3_J42818	604	548	364	622	509	570	310	210	242	335	344	166	359	309	264	269	226	244	512	391	405	445	385	413	363	317	292	334	361	325	Predicted protein
Phatr3_J31906	1178	1034	757	1028	923	1015	5939	6134	5263	5535	5026	2522	2945	3728	3095	2918	2668	2856	1319	1383	1544	1183	1209	1326	1926	2172	2121	1288	1293	1442	Aldehyde dehydrogenase
Phatr3_J42820	321	311	280	304	260	261	351	424	346	373	404	223	280	275	231	215	201	199	350	296	295	319	293	234	413	313	274	203	257	242	Predicted protein
Phatr3_J17555	669	609	255	600	505	551	284	222	262	430	350	248	134	133	87	267	262	286	134	99	99	357	309	322	69	58	64	223	288	228	Predicted protein
Phatr3_J42822	286	324	37	197	170	224	141	222	137	182	193	88	152	107	127	149	113	124	288	215	221	250	219	268	189	142	147	221	185	171	Predicted protein
Phatr3_EG02177	407	414	234	444	315	431	271	237	222	297	270	162	220	177	136	135	71	103	301	303	313	222	174	196	442	294	309	135	179	148	Predicted protein
Phatr3_EG02179	243	291	58	314	205	274	113	136	83	154	160	56	111	126	102	124	109	101	264	210	185	157	211	167	290	186	213	191	191	197	NA
Phatr3_EG01849	0	0	0	0	0	0	0	0	0	0	0	0	0	0	0	0	0	0	0	0	0	0	0	0	0	0	0	0	0	0	NA
Phatr3_EG01840	100	91	18	76	42	86	94	146	141	118	110	75	124	110	92	87	97	100	121	94	109	131	109	133	103	100	117	96	88	98	NA
Phatr3_EG01844	399	363	22	302	256	316	154	218	227	213	238	147	260	197	186	168	151	140	466	384	307	348	300	297	461	302	322	301	348	280	NA
Phatr3_J42824	639	645	128	792	745	784	1012	1217	1074	1496	1506	738	293	482	406	511	717	585	396	383	312	328	330	342	581	323	345	367	416	368	Predicted protein
Phatr3_EG01823	0	0	0	1	0	0	0	0	0	0	0	0	0	0	0	0	0	0	0	0	0	0	0	0	0	0	0	0	0	0	NA
Phatr3_J31912	0	0	0	0	0	0	0	0	0	0	0	0	0	0	0	0	0	0	0	0	0	0	0	0	0	0	0	0	0	0	Predicted protein
Phatr3_EG01856	0	0	0	0	0	0	0	0	0	0	0	0	0	0	0	0	0	0	0	0	0	0	0	0	0	0	0	0	0	0	NA
Phatr3_J42825	52	47	38	78	87	92	18	26	26	44	56	45	64	53	50	101	122	93	52	53	49	118	111	90	51	44	27	91	100	102	Predicted protein
Phatr3_J42826	786	719	29	541	461	627	423	471	532	613	585	297	502	491	493	563	549	557	521	393	400	588	483	586	387	225	208	507	486	458	Predicted protein
Phatr3_J42827	767	692	867	779	717	640	562	657	499	757	654	414	590	702	647	610	627	537	625	611	702	707	707	592	692	561	588	533	585	585	Predicted protein
Phatr3_J42828	1030	775	308	562	622	732	165	196	232	241	199	123	371	355	308	364	363	296	755	735	811	959	855	929	622	595	626	733	698	697	Predicted protein
Phatr3_J9320	777	641	360	645	544	662	3844	3974	3136	3657	3435	1561	1017	1103	1140	980	826	1021	764	888	889	526	549	556	1256	1122	1324	523	415	483	Regulatory proteasome non-atpase subunit 3	RPN3
Phatr3_EG01863	307	250	316	275	238	257	843	953	685	996	799	369	267	291	305	192	189	147	286	276	290	216	206	176	302	228	271	194	166	182	NA
Phatr3_J31918	491	379	166	389	388	389	414	440	387	439	466	244	266	213	279	232	212	244	383	323	319	384	400	404	241	199	179	303	394	318	Predicted protein
Phatr3_J31919	5622	4838	5768	4444	3950	4086	4203	3611	4212	5393	4999	2883	5261	5041	4579	5166	4198	4289	6513	6862	7291	9298	8221	8685	5699	5846	5586	6778	6986	6999	Predicted protein
Phatr3_J42830	332	313	197	247	284	258	193	181	186	315	278	117	226	173	175	149	160	135	160	99	117	112	162	120	62	68	65	104	115	94	Predicted protein
Phatr3_J42831	926	785	139	401	635	671	639	621	576	1112	1217	624	1558	1870	1457	2068	2426	2452	3934	3165	3622	5386	4926	4536	2257	1520	1889	4960	4212	3717	NA
Phatr3_J42832	1248	999	454	1183	895	1069	885	859	858	973	960	469	562	539	511	544	436	406	334	377	392	361	328	370	311	341	369	348	313	306	Superoxide dismutase	SOD2
Phatr3_J9478	423	416	142	435	391	433	350	341	352	399	408	195	454	344	348	231	287	249	362	299	308	248	175	239	444	396	346	190	167	164	Predicted protein
Phatr3_J42834	341	319	127	424	233	372	50	45	54	68	60	33	143	99	96	71	68	63	50	45	35	19	11	17	103	83	82	23	19	14	Predicted protein
Phatr3_J31925	22	22	0	30	30	27	7	0	0	3	2	3	320	310	275	207	251	153	17	27	48	72	38	50	52	76	52	79	77	88	Predicted protein
Phatr3_J42835	453	351	341	314	361	313	712	775	545	703	628	258	1481	2092	1885	852	828	813	1459	1941	1763	557	450	475	5392	4089	3770	497	560	581	Predicted protein
Phatr3_J31927	234	192	178	152	150	160	228	186	204	243	184	81	186	238	158	189	140	153	158	198	225	179	165	188	270	245	265	146	123	158	Predicted protein
Phatr3_J42836	869	649	608	728	760	750	402	360	329	358	311	213	815	904	773	722	631	612	556	599	608	637	493	479	787	784	743	505	458	531	Predicted protein
Phatr3_J41686	731	644	136	551	650	728	497	522	495	585	585	226	3303	4012	3218	2824	2592	2472	781	705	997	824	706	795	1616	2329	1780	886	899	1112	Predicted protein
Phatr3_J42838	225	149	96	199	162	177	136	143	126	121	126	65	297	231	207	187	143	165	141	92	130	124	116	125	115	145	150	121	105	124	Predicted protein
Phatr3_J8659	918	732	719	695	594	600	458	484	433	485	470	256	641	551	526	581	560	464	461	424	421	602	599	641	186	213	228	509	559	524	Predicted protein	ARL1
Phatr3_J9035	2223	2020	1111	2325	1785	1993	809	655	744	1118	1025	524	1544	1431	1400	1423	1328	1287	525	515	516	677	609	620	701	769	646	661	660	660	Glutaredoxin
Phatr3_EG02457	300	285	180	278	263	332	121	102	122	147	132	49	155	129	142	76	93	93	202	145	153	103	84	119	156	170	115	86	70	73	NA
Phatr3_EG02458	16	25	49	21	14	14	8	10	2	19	11	1	6	5	5	8	2	3	1	8	7	13	6	7	1	3	2	7	5	3	NA
Phatr3_J42841	310	264	62	229	187	270	179	156	171	217	246	92	129	118	98	135	98	133	96	73	126	112	118	147	91	82	88	146	103	116	Predicted protein
Phatr3_EG01765	184	175	0	220	133	169	224	192	202	247	195	106	70	71	55	44	46	52	74	46	56	32	18	28	71	76	70	17	32	32	NA
Phatr3_J42843	1062	1008	866	1099	992	932	739	599	523	764	668	400	989	1146	1002	944	871	873	1039	1062	1001	1245	1051	935	997	938	964	911	929	957	Predicted protein
Phatr3_J42844	410	376	239	293	263	325	289	235	254	410	374	200	443	519	401	545	548	545	1308	1211	1100	1675	1476	1234	866	617	616	1268	1324	1142	Predicted protein
Phatr3_J42845	12	12	0	4	5	11	4	10	3	10	8	4	47	39	42	31	20	15	95	75	75	56	39	31	144	102	113	33	41	21	Predicted protein
Phatr3_J31939	204	183	109	149	123	172	271	293	245	363	287	176	309	413	404	422	442	392	312	360	254	448	366	337	333	300	285	402	397	333	Predicted protein
Phatr3_EG01871	108	104	0	64	79	107	72	93	110	99	76	49	72	78	95	108	90	94	61	90	86	131	79	119	141	78	70	87	95	83	NA
Phatr3_J42846	0	0	0	0	0	0	0	0	0	0	0	0	0	0	0	0	0	0	0	0	0	0	0	0	0	0	0	0	0	0	Predicted protein
Phatr3_J8840	241	212	192	225	193	197	175	151	159	230	197	104	196	197	205	167	193	149	207	221	173	272	256	214	157	206	146	175	191	194	Predicted protein
Phatr3_J31942	22	23	0	35	24	24	21	17	15	24	34	29	21	31	14	9	11	12	18	30	29	27	16	19	32	7	21	23	32	27	Predicted protein	DSCYC1
Phatr3_J42848	1123	970	236	971	841	964	933	898	919	1013	919	443	1086	1228	1017	994	930	957	1019	1131	1104	1107	993	1110	1365	1036	1184	977	976	1007	Predicted protein
PTsRNA00004a	9	8	0	5	1	1	0	11	0	2	4	0	1	0	4	2	1	0	4	6	4	5	10	4	2	0	1	6	4	1	NA
PTsRNA00004b	0	0	0	1	2	1	1	0	0	0	3	1	0	3	3	0	0	2	5	1	2	0	1	1	0	5	3	0	0	0	NA
Phatr3_J9509	707	719	230	640	646	654	616	640	548	760	670	354	583	524	478	515	591	551	453	458	546	605	578	630	393	361	339	558	499	485	Predicted protein
Phatr3_J42850	3252	3493	262	3309	3244	3807	2238	2545	2369	2794	2553	1248	1380	1078	983	1011	1034	1076	617	541	740	532	532	833	883	884	800	624	601	614	Predicted protein
Phatr3_J6288	807	756	412	666	604	600	472	404	379	522	470	224	504	408	361	302	293	266	298	235	254	231	232	290	250	279	204	223	239	225	Predicted protein
Phatr3_J42851	493	473	274	408	401	389	393	474	404	489	442	244	326	443	436	383	379	403	351	414	383	352	294	333	489	347	324	290	323	299	Predicted protein
Phatr3_J31948	464	434	88	368	318	332	340	331	222	396	373	137	340	346	335	262	285	254	325	285	343	288	310	317	248	273	231	296	294	250	Predicted protein
Phatr3_J9491	327	301	113	227	229	202	366	409	385	459	382	200	368	462	406	346	354	419	255	203	234	246	235	268	179	120	165	255	234	268	Predicted protein
Phatr3_J9649	270	213	121	260	203	200	279	222	192	273	241	121	249	250	189	242	199	216	208	204	206	249	247	243	161	166	180	192	207	190	Predicted protein
Phatr3_J9312	1096	1047	284	771	733	722	595	530	625	875	843	401	905	1018	793	1264	1078	1326	147	116	108	876	771	897	92	61	39	876	657	699	NA
Phatr3_EG02188	291	298	361	186	202	225	30	41	39	89	69	37	175	115	107	218	141	233	155	135	147	207	199	167	62	54	67	181	177	177	Palmitoyltransferase
Phatr3_EG02199	359	353	389	359	368	342	299	256	276	334	335	153	342	424	332	369	306	292	288	261	265	282	297	254	319	266	234	246	255	280	NA
Phatr3_J9400	2633	2299	5124	2569	2328	2294	1855	1643	1554	2041	1871	1074	2593	2597	2302	1712	1299	1371	2174	2753	2683	1465	1169	1292	4538	4393	4616	1180	1144	1166	Peptidyl-prolyl cis-trans isomerase
Phatr3_EG02201	1370	1137	357	1006	971	979	997	1007	1009	1093	1004	555	963	903	814	844	775	919	1267	1079	1024	1381	1237	1116	1122	999	901	971	1094	1154	Predicted protein
Phatr3_EG02187	120	137	56	124	69	100	37	41	26	59	56	31	44	47	32	37	50	40	92	45	55	65	70	90	62	39	30	54	71	48	NA
Phatr3_J51404	584	592	86	408	455	469	190	183	179	265	264	112	230	170	146	317	242	253	179	98	115	386	408	380	39	27	32	332	294	303	Phosphoglycerate mutase	PGAM_1
Phatr3_J42858	749	659	351	607	501	666	588	649	485	709	657	331	513	506	454	490	477	489	625	449	491	613	621	565	406	365	337	563	637	474	Predicted protein
Phatr3_J51406	163	154	113	156	156	176	179	164	145	206	174	100	188	179	180	172	155	175	195	188	179	194	178	185	179	170	189	158	182	165	Histone acetyltransferase
Phatr3_J42861	433	330	34	328	352	349	70	78	88	126	99	65	638	782	685	649	493	529	757	862	813	777	679	630	1659	1391	1410	669	629	706	Predicted protein
Phatr3_EG01772	591	509	239	411	384	469	166	119	112	171	167	86	212	187	156	192	146	159	415	283	303	442	400	451	231	206	207	331	351	292	NA
Phatr3_J51407	1036	856	285	675	658	871	789	751	647	1050	1072	491	978	1056	982	1209	1090	1280	1811	1707	1739	2504	2257	2196	1403	963	1014	2200	1940	1922	NA
Phatr3_J42864	192	208	111	207	131	178	16	10	20	15	20	23	29	8	11	13	4	10	39	23	22	22	14	39	10	21	9	11	18	13	Predicted protein
Phatr3_J9070	256	199	125	196	203	184	100	115	111	195	182	97	70	56	43	80	68	61	100	58	54	115	119	109	5	16	13	77	71	79	Peptidyl-prolyl cis-trans isomerase
Phatr3_J31963	556	482	517	517	463	482	324	196	237	348	233	123	244	142	128	149	110	127	120	101	120	168	105	154	72	90	95	85	100	96	Predicted protein
Phatr3_J24739	1743	1640	247	1135	1361	1722	1173	1131	1337	1659	1690	1066	3532	3757	3033	3460	3087	3881	4692	4657	4917	5962	4930	5409	4928	4462	4366	5143	4828	5045	Predicted protein
Phatr3_EG01846	0	0	0	0	0	0	0	0	0	0	0	0	0	0	0	0	0	0	0	0	0	0	0	0	0	0	0	0	0	0	NA
Phatr3_EG02190	619	494	738	443	444	418	1056	903	852	963	1040	435	620	810	690	693	606	583	683	747	717	754	798	629	767	762	770	706	754	640	Predicted protein
Phatr3_EG02186	9	9	0	7	11	28	22	13	21	27	15	13	25	13	17	11	28	18	12	8	15	26	13	23	10	19	23	24	19	15	NA
Phatr3_J42867	205	173	125	146	153	165	200	221	189	319	265	110	214	222	325	235	306	292	261	248	261	375	242	241	200	140	161	282	282	260	Predicted protein
Phatr3_J42868	437	365	75	325	268	336	991	982	985	946	948	531	669	807	750	580	578	595	359	317	368	239	289	335	524	416	418	326	277	262	Predicted protein
Phatr3_J31968	273	278	68	248	214	234	938	982	1010	1070	908	432	720	1282	1149	1002	1082	1130	269	365	319	437	369	349	705	445	460	365	366	459	Predicted protein
Phatr3_J8963	615	537	43	495	459	601	303	245	315	371	317	155	323	349	366	328	245	305	429	431	377	373	398	387	519	432	503	430	431	457	Predicted protein
Phatr3_J42870	157	154	95	167	187	164	336	388	332	499	483	230	235	202	219	186	233	159	217	206	218	171	168	189	277	274	289	221	243	155	Predicted protein
Phatr3_J42871	1768	1450	851	1048	1466	1299	618	560	723	806	803	498	2557	3179	2463	2069	1692	1720	2956	3361	3440	2832	2468	2776	4039	4549	4599	2356	2499	2677	Predicted protein
Phatr3_J42872	1511	1429	125	840	1123	1106	350	354	481	662	542	359	1748	1986	1603	1707	1510	1732	2091	2133	2418	2944	2532	3025	1821	1846	2066	2503	2207	2728	Predicted protein
Phatr3_EG01828	290	247	505	196	234	164	99	60	31	105	71	55	400	345	333	372	331	174	619	602	541	590	587	472	206	338	331	425	508	537	NA
Phatr3_J31973	193	144	177	189	128	141	166	149	162	209	168	80	216	187	163	137	115	162	246	199	230	239	247	238	273	206	222	216	185	170	Predicted protein
Phatr3_J42874	413	426	226	252	323	313	263	254	256	392	324	214	420	488	493	470	433	405	548	505	499	581	593	506	520	427	489	499	488	508	Predicted protein
Phatr3_J31975	723	623	429	561	536	463	646	706	637	910	854	388	635	673	632	648	657	654	903	754	715	877	872	757	700	443	473	744	818	690	Predicted protein
Phatr3_J42876	1016	973	437	972	779	937	397	350	389	576	551	274	747	739	664	639	537	586	1503	1382	1237	1330	1236	1083	1555	1052	1033	1001	1239	1068	NA
Phatr3_J8876	238	222	96	254	220	250	256	255	161	241	258	133	172	212	210	109	113	84	198	207	162	111	135	130	303	269	281	129	128	111	Predicted protein
Phatr3_J24748	239	215	122	191	181	185	230	252	232	266	214	121	224	237	236	200	166	195	258	290	300	267	227	285	319	265	289	202	253	263	Predicted protein
Phatr3_J31979	48	54	13	48	40	40	84	53	57	68	67	26	55	56	55	40	43	50	75	56	66	78	67	70	65	43	53	63	56	51	Predicted protein
Phatr3_J31980	145	129	261	119	127	95	141	127	96	131	143	56	49	86	103	80	87	72	115	108	108	109	105	125	71	71	58	94	101	89	Predicted protein
Phatr3_J31981	147	181	129	119	115	129	109	101	95	109	138	96	227	218	224	234	172	193	398	424	455	552	481	437	246	274	296	329	413	337	Predicted protein
Phatr3_J31982	336	318	57	287	281	276	313	345	308	370	386	191	330	381	359	394	261	298	420	437	420	513	504	464	455	425	434	377	377	476	Predicted protein
Phatr3_J42879	483	468	184	360	385	327	502	531	520	614	596	291	539	625	520	602	565	655	716	721	709	923	851	765	711	424	535	843	725	689	Predicted protein
Phatr3_J31984	409	381	199	356	304	315	158	149	166	185	190	92	568	640	643	591	551	496	370	389	422	409	426	319	577	455	442	463	477	421	Predicted protein
Phatr3_J42880	180	203	55	214	174	183	37	44	44	47	49	32	44	44	62	42	38	31	59	38	49	36	34	40	32	46	38	37	38	20	Predicted protein
Phatr3_J31986	146	160	60	145	130	133	119	123	108	118	120	73	97	81	44	53	42	38	115	116	130	92	67	81	121	79	88	110	102	76	Predicted protein
Phatr3_J31987	241	247	145	239	264	221	342	259	241	386	368	174	396	401	413	434	377	351	472	547	506	648	525	497	453	385	437	488	480	543	Predicted protein
Phatr3_J42881	157	164	193	139	195	186	193	159	158	190	186	89	156	160	124	167	129	121	349	298	295	251	280	246	132	153	127	228	215	216	Predicted protein
Phatr3_EG01878	0	0	0	0	0	0	0	0	0	0	0	0	0	0	0	0	0	0	0	0	0	0	0	0	0	0	0	0	0	0	NA
Phatr3_J42882	1162	1160	228	603	873	772	6105	6853	4836	5282	4765	2233	4065	5453	5179	3547	3570	4242	945	2461	2202	1623	1306	1298	3589	2983	2888	1606	1540	1572	Predicted protein
Phatr3_J42883	235	197	421	241	181	160	803	776	345	671	523	250	189	255	279	216	183	154	140	149	154	96	81	96	177	207	210	74	116	101	NA
Phatr3_J31991	527	531	466	730	588	649	233	255	220	274	255	101	42	37	34	36	21	24	9	14	11	23	8	20	11	11	12	14	7	13	Predicted protein
Phatr3_J42884	575	569	551	573	540	516	870	936	856	1061	969	437	529	586	511	524	477	439	406	513	364	465	446	389	542	465	463	385	393	435	Predicted protein
Phatr3_J8842	234	240	96	155	192	195	192	241	295	392	360	186	486	658	449	604	616	659	1305	1158	1146	1746	1504	1318	832	713	699	1267	1230	1273	Predicted protein
Phatr3_EG01874	261	267	154	215	229	225	239	210	185	243	240	134	178	206	196	157	161	120	291	254	259	236	253	182	359	216	257	221	198	207	NA
Phatr3_J31994	420	397	75	302	326	322	184	204	195	244	281	158	365	327	343	376	337	405	721	729	674	893	866	781	445	411	417	649	738	731	Fructose-1, 6-bisphosphatase	FBPC1
Phatr3_J42887	274	232	88	285	293	181	92	83	72	150	156	75	56	76	55	68	71	41	56	42	37	128	66	91	43	23	22	66	70	52	Predicted protein
Phatr3_J42888	424	333	207	470	364	401	501	420	431	362	409	216	39	51	54	67	44	32	13	12	17	30	19	33	35	35	35	24	18	25	Predicted protein
Phatr3_J31997	564	431	315	328	320	359	151	151	125	175	146	63	193	257	221	223	236	254	250	269	243	409	333	351	137	128	128	282	311	348	Predicted protein
Phatr3_J17628	125	103	18	95	115	89	100	93	72	131	123	34	117	185	127	124	121	108	231	224	224	211	230	200	252	201	205	183	181	158	Queuine tRNA-ribosyltransferase
Phatr3_J31999	161	141	244	146	143	121	191	195	151	252	233	100	140	181	149	177	173	172	184	190	182	175	155	171	176	155	206	177	128	190	Predicted protein
Phatr3_J9115	208	196	72	232	170	264	21	12	13	12	25	14	35	19	18	19	11	2	72	41	39	11	20	12	59	49	60	15	24	10	Predicted protein
Phatr3_J42891	563	375	267	772	345	639	58	64	86	71	106	49	8	5	2	8	5	4	1	1	0	1	2	1	0	1	1	5	0	1	Predicted protein
Phatr3_J42892	1384	1203	456	1062	814	1054	576	663	583	919	858	446	470	560	425	550	557	568	1153	845	958	1152	1132	941	1030	503	520	1018	888	799	Predicted protein
Phatr3_J42893	203	183	72	124	101	143	127	74	75	122	77	82	115	116	108	135	102	130	216	180	182	255	251	248	141	129	119	150	203	176	NA
Phatr3_J9446	0	0	0	0	0	0	0	0	0	0	0	0	0	0	0	0	0	0	0	0	0	0	0	0	0	0	0	0	0	0	NA
Phatr3_J42895	521	513	270	511	488	502	562	541	438	613	536	238	468	526	507	486	435	438	525	474	453	480	447	371	740	521	483	376	411	428	Predicted protein
Phatr3_J42896	52	33	0	72	52	65	70	71	99	83	80	49	26	15	16	14	17	20	29	30	14	31	37	28	13	13	12	21	38	45	Predicted protein
Phatr3_EG01798	297	329	351	271	315	229	905	1020	684	964	878	462	701	954	845	697	697	758	1235	1437	1145	1049	985	847	1174	1317	1439	712	832	789	NA
Phatr3_J42897	350	300	158	291	278	253	333	377	281	430	429	174	357	401	365	343	300	317	404	397	435	478	392	395	511	405	384	356	352	350	Predicted protein
Phatr3_EG01768	149	121	32	91	108	106	46	68	48	63	63	40	49	57	58	58	37	47	109	103	106	92	108	102	139	85	112	78	82	63	NA
Phatr3_J51412	629	560	328	492	451	452	15	13	15	20	11	13	134	70	59	98	58	65	239	168	206	379	350	396	69	84	63	259	269	245	NA
Phatr3_J17633	4227	3742	3869	3508	3849	3968	37958	39258	31592	33175	30624	14280	18257	26188	24330	16785	16874	19775	13734	16050	16603	13178	11874	12750	20216	20504	21662	12114	12310	12720	Predicted protein	HSP70_1
Phatr3_J42900	870	744	372	674	518	620	1057	1109	981	1206	1171	539	662	770	683	578	600	640	864	804	878	739	716	740	1151	771	888	600	658	616	Predicted protein
Phatr3_EG01803	350	305	141	313	248	316	285	252	325	323	253	170	176	199	126	178	115	122	144	72	117	140	144	171	122	87	86	127	107	94	NA
Phatr3_EG02189	1490	1399	836	2106	1658	2074	104	98	160	143	115	89	717	624	549	463	351	355	522	462	640	682	470	540	678	1084	760	553	694	732	NA
Phatr3_EG02198	258	252	146	194	208	248	212	225	203	247	319	139	403	537	420	421	412	501	806	659	686	791	707	580	836	482	499	614	745	641	Predicted protein
Phatr3_J42903	2234	1749	1266	2148	1629	1876	9829	9717	7402	8815	7898	3813	3317	5664	5953	3255	3444	3925	843	1133	1075	447	433	497	1711	1518	1631	547	563	511	Predicted protein
Phatr3_J32014	405	419	324	377	296	387	263	218	276	287	267	149	280	317	282	316	289	305	502	481	375	453	498	420	455	252	304	436	495	468	Predicted protein
Phatr3_J42904	512	455	238	369	310	344	355	401	414	381	411	244	316	365	352	338	366	358	397	382	408	486	438	417	325	284	303	351	414	384	Predicted protein
Phatr3_J7108	205	241	251	190	183	224	167	177	157	235	191	99	293	376	358	404	327	416	409	455	373	528	467	411	515	361	432	456	474	431	Predicted protein
Phatr3_EG01789	618	581	332	657	487	550	453	368	316	446	392	185	136	117	78	82	82	88	52	28	24	39	33	56	16	22	12	25	32	30	NA
Phatr3_EG01751	127	137	22	139	97	152	103	115	88	156	139	55	67	80	66	67	74	66	132	114	93	86	81	105	97	86	72	83	110	69	NA
Phatr3_J42906	353	324	148	326	253	261	438	476	367	510	385	197	483	482	475	385	355	326	373	415	387	408	350	308	398	412	360	345	370	307	Predicted protein
Phatr3_J42907	170	175	265	160	144	195	291	268	232	297	305	142	197	197	234	154	158	139	261	278	272	296	230	252	269	313	292	235	204	183	Acyl-coenzyme A dehydrogenase
Phatr3_J9654	905	968	275	914	886	870	1170	1233	1078	1435	1268	712	1649	1996	1747	1737	1599	1727	1731	2039	2004	2297	1834	1824	2364	2077	2228	1837	1736	1985	Histidinol dehydrogenase
Phatr3_J24772	1735	1698	1034	1489	1602	1746	1661	1507	1958	2324	2140	1348	1884	1746	1516	2244	2009	2568	1803	1710	1809	2934	2538	2902	655	773	808	2403	2066	2348	Predicted protein
Phatr3_J42910	241	206	152	209	206	189	155	136	131	230	167	98	105	141	104	114	108	100	214	131	160	240	206	233	81	77	61	174	176	156	Predicted protein
Phatr3_J42911	1778	1465	1055	1231	1154	1297	519	467	364	588	460	216	899	916	659	942	811	807	783	752	899	1221	1149	1193	519	553	530	1017	1064	1082	Predicted protein
Phatr3_J42912	377	412	134	448	420	439	126	149	155	185	168	95	155	125	106	162	158	169	83	80	59	101	113	95	47	52	65	101	88	85	Predicted protein
Phatr3_J42913	1810	1640	549	1344	1536	1434	931	1019	1053	1375	1345	748	1676	1992	1984	2160	2056	2216	1941	1939	1867	2335	2327	2135	1845	1612	1566	1999	2051	2166	NA
Phatr3_J42914	858	608	248	518	497	570	143	96	167	114	102	63	601	413	354	397	274	278	486	407	482	491	436	536	491	552	512	453	443	590	Predicted protein
Phatr3_J9619	1103	1089	287	1202	1161	1213	546	545	453	622	551	298	687	553	448	491	395	351	426	303	388	368	328	498	340	402	385	383	435	409	NA
Phatr3_J32027	234	189	102	190	140	163	253	272	209	220	239	121	187	268	269	189	154	238	304	361	309	322	231	286	397	299	319	207	239	284	Predicted protein
Phatr3_J24775	768	691	136	735	591	644	1354	1423	1009	1725	1507	619	619	781	663	525	684	577	880	713	788	640	660	647	1364	715	749	670	567	452	NA
Phatr3_J42917	273	250	70	274	224	290	321	379	295	367	314	186	226	266	258	283	235	198	202	160	201	182	212	196	177	182	181	212	161	205	Predicted protein
EPrPhatr3G00000013102	2	0	0	2	3	0	8	12	8	9	18	4	10	1	7	6	2	7	0	0	2	0	8	6	4	6	1	2	4	5	NA
Phatr3_J42918	201	183	33	169	134	173	109	93	130	167	146	59	154	141	111	150	136	119	215	183	211	199	202	225	167	150	150	240	166	209	Predicted protein
Phatr3_J32031	647	539	414	591	574	596	718	640	699	728	809	342	472	484	430	408	384	368	498	588	505	647	584	554	493	424	436	467	515	489	Predicted protein
Phatr3_J9606	154	148	221	154	133	90	236	189	121	180	161	94	165	125	129	147	116	114	193	201	199	176	161	137	201	191	230	147	164	158	Predicted protein
Phatr3_J8975	325	272	219	279	263	290	36	35	27	50	30	17	322	334	281	304	307	295	448	473	454	644	590	469	576	393	430	579	578	637	Glycerol-3-phosphate dehydrogenase [NAD(+)]
Phatr3_J42920	236	228	221	213	169	170	156	164	106	155	173	80	229	215	172	150	205	145	241	241	243	298	265	261	237	205	197	222	246	209	NA
Phatr3_J8891	856	668	297	716	727	658	1339	1326	1446	1582	1540	926	659	704	694	746	657	687	644	683	663	808	774	770	694	516	624	642	736	698	Predicted protein
Phatr3_J32036	331	285	67	191	247	266	222	207	242	385	399	183	543	679	465	670	714	787	2269	1915	1923	3029	2446	2226	1237	1000	1038	2021	1976	1907	Predicted protein
Phatr3_J24783	313	264	318	271	256	236	328	315	278	334	300	179	210	198	185	164	163	151	218	257	214	205	183	187	234	182	180	145	174	171	Predicted protein
Phatr3_J32038	197	142	23	155	144	124	196	175	161	259	202	82	90	128	105	109	102	106	270	252	241	304	263	262	150	180	152	221	207	213	Predicted protein
Phatr3_J8737	1389	1108	729	1036	936	944	996	1084	852	1072	1140	509	1064	1235	1149	1265	1254	1208	2145	1880	1965	2623	2424	2026	1726	1368	1408	2021	2181	1965	Predicted protein
Phatr3_J42926	184	206	300	130	192	214	378	390	313	398	406	223	361	510	529	504	368	501	938	931	809	939	980	672	765	540	616	738	782	668	Predicted protein
Phatr3_J32041	79	59	0	51	59	62	34	26	30	19	33	20	23	55	36	22	20	28	159	154	145	79	62	71	196	124	159	73	63	65	Predicted protein
Phatr3_J42927	407	330	135	382	320	370	328	376	309	415	343	176	198	143	179	128	129	153	370	286	336	195	220	206	323	245	254	182	157	167	Predicted protein
Phatr3_J42928	400	423	107	332	374	318	311	279	248	305	284	182	285	329	200	181	203	169	312	289	341	252	275	262	300	293	288	260	211	175	Predicted protein
Phatr3_J42929	452	404	143	331	379	284	348	418	369	433	415	245	454	450	468	434	381	352	269	352	273	277	226	231	462	404	370	272	247	230	Predicted protein
Phatr3_EG02406	538	577	275	487	480	490	407	404	450	472	543	273	356	383	383	333	336	365	567	511	488	584	580	523	448	562	500	396	475	499	Predicted protein
Phatr3_J8990	318	233	78	222	249	244	161	129	154	254	231	110	117	137	117	171	144	173	108	130	121	158	153	179	36	77	69	149	177	148	Predicted protein
Phatr3_J9634	309	235	277	206	237	176	284	267	190	318	288	164	342	406	390	321	354	288	704	753	699	587	505	544	960	932	935	495	537	467	Predicted protein
Phatr3_EG01805	0	0	0	0	0	0	0	0	0	0	0	0	0	0	0	0	0	0	0	0	0	0	0	0	0	0	0	0	0	0	NA
Phatr3_J42932	426	365	65	310	298	312	81	81	86	139	117	91	201	141	142	202	139	156	456	302	338	396	352	338	255	157	150	341	340	266	Predicted protein
Phatr3_EG01883	949	533	166	602	459	711	340	310	218	561	549	194	507	494	424	519	653	480	556	421	536	744	743	639	322	284	317	760	582	442	NA
Phatr3_J42934	391	360	37	427	319	430	89	44	95	85	79	31	4	5	0	1	2	5	1	2	0	3	0	1	23	24	21	1	2	0	Arylsulfatase
Phatr3_J42935	311	284	83	286	229	235	248	265	228	290	277	131	176	174	173	135	159	139	250	204	224	241	256	186	146	119	133	213	213	209	Predicted protein
Phatr3_EG01808	159	153	51	171	135	162	85	66	67	63	79	35	90	116	106	100	66	107	212	197	184	218	178	181	166	97	153	139	148	169	NA
Phatr3_J24792	465	432	100	421	476	391	375	295	334	459	395	246	526	516	467	498	458	455	654	672	727	800	774	652	554	521	593	635	654	659	Queuine tRNA-ribosyltransferase
Phatr3_J9267	470	423	416	483	379	462	137	139	131	170	140	73	232	214	161	145	116	89	106	69	66	72	48	57	105	137	123	47	84	56	Peptidyl-prolyl cis-trans isomerase
Phatr3_J51422	508	589	218	591	539	510	212	181	238	312	258	139	164	126	124	250	193	221	54	40	52	124	115	159	14	6	10	114	149	128	1-aminocyclopropane-1-carboxylate synthase
Phatr3_J32057	156	138	21	88	81	91	64	72	104	91	113	32	155	114	88	117	118	115	44	51	49	65	51	92	59	38	40	63	74	75	Predicted protein
Phatr3_EG01758	0	0	0	0	0	0	0	0	0	0	0	0	0	0	0	0	0	0	0	0	0	0	0	0	0	0	0	0	0	0	NA
Phatr3_EG01800	0	0	0	0	0	0	0	0	0	0	0	0	0	0	0	0	0	0	0	0	0	0	0	0	0	0	0	0	0	0	NA
Phatr3_J42940	650	513	187	501	456	497	222	236	229	335	277	155	357	386	324	378	310	351	470	383	437	502	557	469	384	274	266	421	487	448	Predicted protein
Phatr3_J42941	507	477	100	485	341	385	190	162	216	240	213	87	125	105	86	72	62	55	195	124	132	92	120	132	119	112	122	61	83	113	Predicted protein
Phatr3_J42942	1081	946	102	812	768	794	619	692	688	929	859	532	595	626	528	539	484	503	894	728	712	865	801	743	834	562	587	698	742	690	Predicted protein
Phatr3_EG01847	0	0	0	0	0	0	0	0	0	0	0	0	0	0	0	0	0	0	0	0	0	0	0	0	0	0	0	0	0	0	NA
Phatr3_J42944	467	407	42	311	235	367	330	359	286	436	430	202	209	240	231	318	251	293	342	294	322	383	357	330	577	374	386	320	323	263	Predicted protein
Phatr3_EG02410	690	618	139	496	408	493	241	238	210	232	238	124	472	412	298	399	317	361	590	650	631	659	536	696	772	636	654	571	544	619	Predicted protein
Phatr3_J42946	630	457	247	414	375	352	238	197	178	173	229	99	326	322	246	190	156	185	369	297	322	356	306	323	213	213	227	252	307	308	NA
Phatr3_J32065	165	103	8	72	100	71	25	15	32	32	19	8	37	46	25	46	41	32	93	53	107	111	109	122	68	73	76	107	67	85	Predicted protein
Phatr3_J8678	256	264	53	287	192	225	287	260	271	300	312	127	258	255	239	254	241	232	321	342	295	384	329	375	363	272	288	285	315	356	NA
Phatr3_EG01810	0	0	0	0	0	0	0	0	0	0	0	0	0	0	0	0	0	0	0	0	0	0	0	0	0	0	0	0	0	0	NA
Phatr3_J42948	490	400	209	425	292	379	317	285	262	383	339	154	345	430	378	379	391	463	425	373	343	554	455	459	554	350	293	518	426	404	Predicted protein
Phatr3_J42949	1475	1286	646	1136	1017	1063	1489	1464	1449	1547	1324	827	1498	1802	1692	1330	1272	1315	1978	2490	2511	1982	1874	2022	2487	2357	2428	1710	1746	1866	Predicted protein
Phatr3_J42950	180	119	24	91	74	113	143	124	98	134	130	58	94	103	120	100	78	65	156	120	158	146	171	150	181	119	147	89	143	122	Predicted protein
Phatr3_J42951	590	445	305	363	352	404	195	132	129	178	200	93	281	237	206	186	174	145	393	258	308	391	300	321	276	253	249	297	303	286	Predicted protein
Phatr3_J32071	2088	1791	1909	1259	1665	1345	13	10	23	31	43	35	1839	1712	1448	3526	3197	2690	525	595	557	1621	1280	1137	770	908	650	1638	2026	2135	Predicted protein
Phatr3_J17671	3060	2709	1123	2515	2428	2524	1629	1666	1752	1961	1941	1006	1900	1979	1822	2054	1827	1746	1231	1381	1444	1856	1547	1608	1479	1459	1300	1499	1424	1568	Predicted protein
Phatr3_J42953	241	204	24	149	164	175	96	94	113	179	144	83	133	122	134	139	127	92	164	114	95	132	113	155	88	62	66	136	105	119	Predicted protein
Phatr3_EG01804	828	702	293	770	678	794	807	749	788	950	812	417	589	704	594	575	455	475	554	582	584	496	540	533	643	734	688	493	458	517	NA
Phatr3_J8918	523	469	413	508	481	549	509	514	369	487	497	248	378	340	321	411	258	266	193	137	171	220	253	245	115	175	139	212	197	196	Predicted protein
Phatr3_J42955	50	42	8	58	73	65	11	14	15	20	15	7	25	22	19	26	19	28	34	22	12	31	26	17	9	12	14	10	27	8	Predicted protein
Phatr3_J42956	269	238	169	237	168	181	184	178	138	229	207	112	134	102	82	123	88	89	137	105	113	119	118	128	125	92	80	99	86	103	Predicted protein
Phatr3_J42957	793	662	440	599	538	661	340	312	298	396	342	162	413	521	388	418	382	393	611	742	706	861	749	755	617	546	531	688	547	605	Predicted protein
Phatr3_J42958	670	598	527	554	465	457	496	548	453	688	615	275	433	517	449	433	438	479	489	483	430	524	512	519	360	324	323	427	455	461	Predicted protein
Phatr3_J42959	229	196	169	187	182	167	193	172	197	215	216	96	137	97	79	94	84	93	147	124	143	131	149	125	119	98	118	135	115	90	Predicted protein
Phatr3_J42960	172	199	58	257	147	213	877	1060	1007	1028	944	421	30	17	11	15	22	10	30	29	21	25	18	25	14	16	12	18	12	12	Predicted protein
Phatr3_EG01771	200	162	27	135	114	143	239	246	212	208	151	82	183	135	124	112	92	73	145	148	140	148	115	118	121	131	106	103	96	81	NA
Phatr3_J42962	446	394	422	427	344	476	296	253	212	294	298	145	92	68	61	93	84	76	1	0	8	5	1	8	4	4	4	13	10	4	2-phosphoglycerate dehydratase
Phatr3_EG01799	0	0	0	0	0	0	0	0	0	0	0	0	0	0	0	0	0	0	0	0	0	0	0	0	0	0	0	0	0	0	NA
Phatr3_J32083	210	222	98	177	163	187	292	276	284	338	303	153	175	228	247	199	192	194	116	132	118	86	121	117	156	96	104	121	93	117	Predicted protein
Phatr3_J42963	581	551	210	486	539	506	449	439	518	530	499	283	744	948	913	899	739	894	914	976	948	1287	1172	1245	1108	807	928	1101	1088	1186	Predicted protein
Phatr3_EG02196	642	635	297	704	497	603	480	506	499	769	651	356	446	506	416	259	267	348	627	609	581	535	496	488	804	449	489	476	488	433	NA
Phatr3_EG02184	290	233	0	190	156	246	246	318	321	376	361	217	144	127	136	110	73	108	233	215	192	184	134	169	328	201	193	148	136	111	NA
Phatr3_J2761	766	612	255	607	639	635	1104	1125	1115	1172	1036	579	1049	1156	974	1120	1033	1112	1278	1347	1309	1274	1098	1160	1550	1598	1590	1112	1066	1044	Predicted protein
Phatr3_J32087	587	603	96	504	530	593	963	887	966	814	842	435	604	682	687	571	612	538	676	741	684	712	755	764	941	679	725	619	606	668	Predicted protein	DSCYC5
Phatr3_EG01870	931	854	196	821	767	825	860	842	799	907	956	561	690	678	703	719	615	653	396	406	458	445	387	545	371	474	482	378	392	449	Chloroplast-targeted nuclear-encoded recombinase	RECA
Phatr3_J17683	712	629	475	675	632	704	728	706	696	874	877	429	636	715	655	628	669	643	345	405	393	427	410	438	428	355	427	428	403	424	Predicted protein	SYBA
Phatr3_J42968	478	348	130	328	256	347	260	224	206	314	308	129	319	267	239	239	262	307	316	239	279	328	341	379	192	168	161	312	293	263	Predicted protein
Phatr3_J54015	1455	1342	723	1149	1244	1338	637	606	583	1053	915	479	2232	2128	1825	1798	1597	1594	1191	1388	1420	1236	1112	1295	2754	3540	3162	1243	1124	1341	Serine hydroxymethyltransferase	SHMT2
Phatr3_J42970	755	649	572	731	595	653	547	483	528	748	615	358	392	396	442	391	325	299	359	313	319	331	225	251	277	312	242	210	229	219	Predicted protein
Phatr3_J42971	289	288	131	326	238	268	124	133	140	144	139	80	130	99	116	91	56	82	134	98	102	102	107	88	149	117	137	67	79	87	Predicted protein
Phatr3_J42972	141	107	22	121	148	90	125	125	135	181	164	87	114	115	138	103	97	116	98	117	100	110	77	111	117	62	72	104	81	91	Predicted protein
Phatr3_J32094	176	143	107	112	116	101	256	213	182	226	198	105	198	222	224	184	192	176	161	198	195	159	119	180	274	288	246	150	167	148	Predicted protein
Phatr3_J32095	133	108	33	228	117	181	55	23	22	26	16	6	31	17	9	7	12	9	13	10	6	6	4	6	33	29	21	7	4	3	Predicted protein
Phatr3_J24820	6678	6126	6833	5314	5416	5847	36616	39283	32106	32878	30387	14655	18941	26417	24809	16904	16565	19199	12910	15927	15566	12873	11664	12086	19976	19910	20699	10994	11043	11664	Mitochondria-targeted chaperonin	CPN60_1
Phatr3_J32097	131	130	55	95	67	116	4	7	19	6	5	4	23	12	4	17	13	24	26	8	12	47	23	28	3	7	3	13	18	23	Predicted protein
Phatr3_J42975	426	385	114	341	257	387	253	246	238	339	321	167	274	250	231	229	253	282	282	246	244	276	283	308	240	213	190	214	265	254	Predicted protein
Phatr3_J32099	130	94	89	132	71	150	82	79	62	107	98	59	82	111	93	84	70	83	103	72	84	108	96	102	107	46	70	85	75	64	Predicted protein
Phatr3_J8987	830	735	210	568	631	565	272	182	269	546	533	317	1406	1424	1384	1902	1865	2158	58	61	77	335	342	380	12	24	19	483	353	373	Predicted protein
Phatr3_EG01829	0	0	0	0	0	0	0	0	0	0	0	0	0	0	0	0	0	0	0	0	0	0	0	0	0	0	0	0	0	0	NA
Phatr3_J42977	720	616	843	823	593	711	159	112	148	251	222	141	530	524	513	580	508	509	30	39	66	72	52	70	108	100	98	71	94	74	Predicted protein
Phatr3_J42978	693	704	247	906	765	943	1484	1508	1208	1503	1420	658	464	508	490	526	573	525	43	46	54	79	83	75	136	115	127	101	112	105	Predicted protein
Phatr3_J54017	5992	5819	4552	5942	5517	5965	27	25	40	102	96	63	2092	2084	1839	2482	2417	2619	940	946	967	1854	1435	1737	1928	1399	1372	1755	1738	1757	Plastidic triose-phosphate/phosphate translocator	TPT3
Phatr3_J42980	1018	913	301	1008	740	922	2673	2819	2222	2846	2685	1334	1117	1771	1612	1214	1420	1673	357	526	391	159	172	172	1545	897	1092	222	160	152	Predicted protein
Phatr3_J42981	215	142	82	207	147	187	780	749	580	885	767	271	434	792	681	500	669	653	242	236	190	367	306	317	251	271	291	316	301	246	Predicted protein
Phatr3_J42982	341	285	208	335	239	277	451	482	484	670	630	288	438	568	557	475	542	605	78	66	76	94	82	77	98	79	77	87	94	77	NA
Phatr3_J51430	847	741	215	680	648	759	616	585	596	662	679	405	704	865	718	1021	852	958	1582	1704	1521	2418	2092	1936	1171	1057	1067	1717	1741	1810	Glutamate-trna ligase	GLURS_1
Phatr3_EG01755	0	0	0	0	0	0	0	4	0	0	1	0	0	0	0	0	3	0	0	0	1	0	0	0	0	0	0	0	0	0	NA
Phatr3_J54019	3	0	0	0	0	0	3	2	1	7	6	2	2	3	4	5	4	1	0	3	0	2	0	1	1	0	2	0	1	0	Protein heat shock protein Hsp70	HSP70A
Phatr3_J7114	240	235	203	252	242	276	570	616	498	607	615	313	310	521	438	346	476	442	383	451	351	370	391	320	500	403	418	325	314	333	Predicted protein
Phatr3_J24838	377	435	283	446	360	416	181	219	243	265	250	127	171	153	124	101	82	106	113	61	70	65	60	54	69	65	52	52	52	39	Type II DNA topoisomerase VI subunit	TOP6A
Phatr3_EG01763	15	13	0	22	3	22	22	13	9	20	22	4	1	12	4	5	0	7	27	16	16	9	14	19	5	20	14	11	5	11	NA
Phatr3_EG02405	1209	1097	147	1196	995	1184	1269	1279	1267	1878	1602	747	602	809	655	693	605	681	1194	918	997	980	1005	964	1102	851	777	777	842	748	Predicted protein
Phatr3_J8970	616	560	79	495	411	448	371	349	293	439	388	185	322	321	234	237	221	192	368	255	245	184	198	284	461	337	276	186	174	156	Predicted protein
Phatr3_J32113	528	471	206	514	441	423	292	290	312	333	249	136	138	111	74	120	84	78	45	26	34	66	44	59	27	28	38	50	41	45	Predicted protein
Phatr3_J42989	461	393	175	442	325	415	195	121	184	242	223	114	172	131	88	85	88	78	166	111	120	139	128	139	37	71	62	62	88	81	Predicted protein
Phatr3_J42990	771	707	197	642	578	633	350	272	257	492	396	208	328	346	243	313	223	284	599	515	475	535	560	517	464	374	344	496	465	457	Predicted protein
Phatr3_J17720	496	450	438	621	494	512	141	115	176	217	240	82	41	39	24	19	17	9	37	23	24	11	9	10	34	48	33	7	7	5	Precursor of ligase long chain acyl-coa ligase	ACL1
Phatr3_J8815	1497	1337	360	1294	1200	1217	1268	1292	1230	1458	1360	682	1008	954	915	803	713	822	955	962	1008	854	725	801	1092	953	895	718	735	725	S-phase kinase-associated protein	SKP1_3
Phatr3_J32118	148	102	32	85	90	87	16	27	34	22	12	10	64	53	58	47	27	34	143	130	149	140	128	135	86	97	90	80	98	114	Predicted protein
Phatr3_EG01830	0	0	0	0	0	0	0	0	0	0	0	0	0	0	0	0	0	0	0	0	0	0	0	0	0	0	0	0	0	0	NA
Phatr3_EG01850	0	0	0	0	0	0	0	0	0	0	0	0	0	0	0	0	0	0	0	0	0	0	0	0	0	0	0	0	0	0	NA
Phatr3_EG01834	0	0	0	0	0	0	0	0	0	0	0	0	0	0	0	0	0	0	0	0	0	0	0	0	0	0	0	0	0	0	NA
Phatr3_J32119	0	0	0	0	0	0	0	0	0	0	0	0	0	0	0	0	0	0	0	0	0	0	0	0	0	0	0	0	0	0	Predicted protein
Phatr3_J32120	669	617	234	540	588	528	238	234	261	425	372	167	425	449	414	512	406	460	394	317	374	601	512	435	232	203	234	452	482	461	Sad1 and UNC84 domain containing	UNC84/SAD1
Phatr3_EG01859	0	0	0	0	0	0	0	0	0	0	0	0	0	0	0	0	0	0	0	0	0	0	0	0	0	0	0	0	0	0	NA
Phatr3_J42993	522	380	300	375	255	354	90	58	65	104	81	38	189	195	135	149	116	110	288	172	228	290	275	292	184	178	182	274	240	204	Predicted protein
Phatr3_J9143	719	613	119	540	584	588	566	736	710	849	765	381	724	849	694	749	795	804	2055	1942	1724	2573	2224	1827	1588	1231	1241	1760	1767	1794	Predicted protein
Phatr3_J42995	192	167	60	218	161	209	108	85	88	116	106	61	107	74	77	104	70	83	173	132	124	169	153	165	96	110	95	155	177	157	Enhancer of polycomb-like protein
Phatr3_J42996	1007	862	502	898	789	843	565	535	425	664	662	313	682	701	693	571	644	579	1005	917	918	967	891	792	1402	1020	963	812	800	744	Predicted protein
Phatr3_J42997	199	169	27	182	152	169	70	101	73	128	113	57	79	112	84	88	78	109	114	109	114	191	117	121	96	115	113	108	113	143	Predicted protein
Phatr3_J42998	1135	888	282	865	781	915	687	581	535	900	776	303	600	614	440	529	574	568	857	698	669	922	837	795	718	536	553	815	756	646	NA
Phatr3_J5588	129	116	0	78	45	98	62	118	66	125	108	53	70	72	62	65	62	72	113	92	102	120	108	141	94	107	100	136	90	109	Predicted protein
Phatr3_J17728	648	540	303	448	463	477	224	164	166	294	296	106	292	300	269	284	274	318	723	523	645	782	755	766	502	360	395	590	706	514	Predicted protein
Phatr3_J9161	545	443	326	371	407	376	383	400	442	532	529	313	509	590	553	584	541	633	752	802	716	935	789	828	703	672	659	747	625	703	Predicted protein
Phatr3_J32129	48	54	14	46	42	49	28	33	18	32	23	29	27	14	22	19	16	10	15	23	22	35	33	25	26	28	22	32	23	21	Predicted protein
Phatr3_J8810	444	358	195	384	317	352	712	731	579	866	737	354	274	307	244	211	184	184	332	226	232	181	233	263	314	237	199	193	202	166	NA
Phatr3_J24865	1116	1039	634	916	824	912	5580	6127	4998	5821	5243	2326	1430	1935	1793	1102	1232	1286	799	998	977	523	521	453	1922	1511	1545	476	440	420	Regulatory proteasome non-atpase subunit 5	RPN5
Phatr3_J32132	378	333	143	343	328	315	259	252	227	213	284	143	310	276	252	238	227	240	299	302	276	300	319	318	253	299	263	270	236	304	Predicted protein
Phatr3_J8827	300	300	208	202	218	250	113	119	105	123	159	71	250	284	236	260	267	237	350	309	303	431	391	352	296	178	203	365	419	369	NA
Phatr3_J54026	1816	1511	1291	1510	1339	1382	2800	2526	2234	2510	2202	1169	1641	1916	1936	1745	1540	1495	1153	1219	1133	1492	1464	1399	1186	965	1012	1217	1272	1367	Predicted protein
Phatr3_J9388	580	470	132	456	429	512	353	390	352	355	357	194	416	377	328	276	292	272	426	510	454	456	441	482	410	367	376	424	370	402	NA
Phatr3_J9625	321	305	29	256	198	236	186	188	178	192	199	83	149	147	185	133	175	158	341	284	273	307	320	254	260	162	171	246	263	264	NA
Phatr3_J43008	599	470	197	474	502	566	404	377	286	428	383	237	420	431	404	484	327	394	618	588	620	721	649	732	420	429	430	619	650	612	Predicted protein
Phatr3_J107	4929	4515	699	3249	3340	3807	6122	6721	6566	7323	6644	4005	4765	5777	5270	6493	5712	6960	5021	5169	5048	7099	6478	5710	6827	3881	4465	6368	5996	6126	NA
Phatr3_J32139	584	584	463	496	556	560	599	708	513	969	829	382	858	766	832	943	812	740	1176	1241	1204	1546	1361	1269	845	558	676	1235	1358	1266	Predicted protein
Phatr3_J43010	453	420	111	415	386	399	822	871	783	922	841	435	509	535	521	524	533	542	618	549	543	631	656	560	398	333	371	516	757	643	Predicted protein
Phatr3_J9231	848	696	59	724	609	712	423	382	338	559	517	202	511	499	430	530	507	556	746	628	668	795	810	824	541	551	533	676	654	653	Predicted protein
Phatr3_J9157	1041	979	412	751	714	846	434	389	408	577	544	273	684	751	692	822	782	804	602	598	580	709	655	692	519	431	457	616	625	612	NA
Phatr3_J43013	441	408	107	264	307	399	226	215	199	239	238	131	232	151	185	186	206	243	338	351	347	459	420	452	233	199	230	352	356	310	Predicted protein
Phatr3_J32144	437	462	132	382	385	432	801	766	719	868	767	410	477	495	465	446	398	367	541	572	537	504	462	470	581	398	466	386	472	473	Predicted protein
Phatr3_J8802	3266	2768	4695	2793	2766	2710	3734	3263	2866	4251	3921	2175	4354	3903	3982	3741	3612	3219	4107	4519	4313	4973	4647	4269	3484	3307	3224	3841	4450	4316	Predicted protein
Phatr3_J9529	442	427	10	341	313	377	213	241	277	304	278	126	227	212	220	237	239	223	455	350	299	527	443	353	262	200	204	405	456	422	Predicted protein
Phatr3_J43016	1287	1207	754	1022	961	1017	1212	1098	1050	1425	1364	727	1249	1299	1159	1279	1341	1386	3129	2884	2822	3694	3196	3224	2318	1842	2021	2597	2717	2708	Predicted protein
PTsRNA00019a	0	0	0	0	0	0	0	0	0	0	0	0	0	0	0	0	0	0	0	0	0	0	0	0	0	0	0	0	0	0	NA
Phatr3_EG01750	429	406	397	408	371	425	305	332	275	385	365	160	270	267	269	231	265	219	337	366	332	377	348	359	359	267	293	350	314	302	NA
Phatr3_J43018	783	802	340	759	687	815	316	343	270	361	360	158	262	267	210	262	264	217	360	271	312	392	410	368	310	217	215	336	386	308	NADPH:adrenodoxin oxidoreductase, mitochondrial
Phatr3_J43019	697	756	239	638	613	652	386	338	342	463	469	208	371	307	337	394	312	367	559	488	475	692	628	595	358	309	323	532	520	542	Zw10 like protein
Phatr3_J43021	402	439	341	329	362	387	501	580	395	582	484	222	395	420	481	423	471	389	274	277	319	361	353	403	250	215	236	359	330	336	Predicted protein
Phatr3_EG01757	474	495	619	527	468	490	261	306	198	348	280	152	328	312	306	263	258	217	341	324	370	316	310	343	254	205	221	234	253	314	NA
Phatr3_J43022	593	520	239	463	443	412	316	317	319	441	356	182	503	487	471	428	443	427	434	381	432	419	465	458	413	310	319	397	441	370	Predicted protein
Phatr3_EG01780	0	0	0	0	0	0	0	0	0	0	0	0	0	0	0	0	0	0	0	0	0	0	0	0	0	0	0	0	0	0	NA
Phatr3_EG01754	0	0	0	0	0	0	0	0	0	0	0	0	0	0	0	0	0	0	0	0	0	0	0	0	0	0	0	0	0	0	NA
Phatr3_EG01795	0	0	0	0	0	0	0	0	0	0	0	0	0	0	0	0	0	0	0	0	0	0	0	0	0	0	0	0	0	0	NA
Phatr3_J43023	896	941	596	938	711	808	647	660	641	834	757	349	463	454	431	415	447	383	674	640	611	734	654	606	565	404	466	560	689	628	NA
Phatr3_J43024	518	451	291	371	408	356	214	184	234	276	308	137	341	381	312	455	387	413	479	440	493	939	904	683	313	215	203	636	708	681	Predicted protein
Phatr3_J43025	123	114	15	80	79	132	94	111	86	106	146	87	118	132	76	147	94	159	134	107	94	185	196	174	85	70	34	122	101	159	Predicted protein
Phatr3_J43026	256	213	105	189	157	218	46	28	33	55	51	22	91	73	64	76	44	46	146	116	119	221	179	235	86	104	83	159	149	142	Predicted protein
Phatr3_EG01812	278	223	111	217	199	275	273	260	207	299	251	129	203	259	204	250	202	188	239	197	191	297	202	243	176	175	222	221	204	224	NA
Phatr3_J43027	335	248	243	285	258	259	503	507	426	499	474	213	420	432	424	390	403	343	315	295	287	335	344	313	530	353	338	310	336	345	Predicted protein
Phatr3_J24886	2859	2520	1006	1869	1754	2083	1306	1121	1146	1109	1122	544	1227	984	933	860	779	821	1490	1434	1595	1439	1369	1673	1278	1199	1420	1306	1229	1148	Predicted protein
Phatr3_EG01837	0	0	0	0	0	0	0	0	0	0	0	0	0	0	0	0	0	0	0	0	0	0	0	0	0	0	0	0	0	0	NA
Phatr3_J32160	587	492	457	410	487	488	107	85	84	147	143	58	126	67	82	137	44	71	122	104	144	158	151	176	42	46	68	113	125	118	Predicted protein
Phatr3_J43029	777	747	424	653	498	666	400	390	394	583	582	325	370	476	454	518	498	533	887	663	729	1065	987	818	702	419	371	832	832	778	Predicted protein
Phatr3_J9235	536	401	47	359	418	461	342	263	316	454	459	218	380	359	312	639	616	744	596	471	562	1202	1056	1075	102	126	137	845	811	866	DNA-directed RNA polymerase
Phatr3_J54027	32020	29086	27250	26968	25121	24883	5175	4455	4515	7390	7202	4058	1656	1176	1079	6060	4406	4272	666	503	599	1405	1182	1320	315	394	282	1007	1178	1077	Protein fucoxanthin chlorophyll a/c protein	LHCR12
Phatr3_J17766	44918	42759	55584	41398	36893	37427	5402	4621	5206	9689	8562	4952	720	393	301	5533	4453	4562	53	25	26	516	466	577	22	17	14	382	391	290	Protein fucoxanthin chlorophyll a/c protein	LHCR4
Phatr3_J9476	370	417	245	286	318	342	136	126	92	284	248	167	254	169	169	504	428	443	977	907	799	1455	1441	1029	185	123	128	1024	1078	1063	Predicted protein
Phatr3_EG02193	1746	1510	1843	1817	1552	1350	787	628	490	822	671	383	946	825	861	904	797	663	635	588	584	806	768	668	351	464	380	567	667	620	NA
Phatr3_EG02181	1020	936	745	759	895	886	2486	2922	2285	2737	2345	1072	924	1092	1016	886	989	978	953	996	927	858	858	714	1500	1073	1045	717	757	702	Predicted protein
Phatr3_J43034	1003	889	207	639	867	745	873	1006	992	1165	1148	673	897	1215	1227	1111	1208	1235	1396	1549	1388	1438	1291	1143	1617	1129	1160	1169	1225	1240	Predicted protein	DSCYC4
Phatr3_J17772	1336	1304	445	991	1073	1095	1197	1153	1275	1525	1579	845	1639	1727	1571	2268	2094	2415	4098	3705	3519	5428	4880	4638	2573	1922	2068	4148	4240	4131	Predicted protein
Phatr3_J54028	792	714	112	640	501	698	344	315	294	436	481	212	374	330	309	412	397	444	535	494	512	640	614	564	436	348	423	548	502	504	Predicted protein	AP3DELTA
Phatr3_EG02167	986	915	17	682	561	943	331	268	314	469	475	239	511	421	272	713	603	854	353	309	367	722	640	986	197	241	299	745	507	578	Predicted protein
Phatr3_EG01831	0	0	0	0	0	0	0	0	0	0	0	0	0	0	0	0	0	0	0	0	0	0	0	0	0	0	0	0	0	0	NA
Phatr3_EG02166	911	782	1103	986	743	813	497	392	290	640	588	301	446	503	415	695	658	515	507	401	396	716	727	548	303	241	259	514	614	517	NA
Phatr3_J43038	854	760	110	596	601	719	665	719	675	825	786	385	630	615	612	555	551	597	747	682	724	652	614	772	867	587	601	643	585	632	Predicted protein
Phatr3_J8773	912	873	156	814	691	894	645	606	591	702	698	361	656	641	527	542	447	516	529	450	572	341	383	607	542	506	533	425	363	364	NA
Phatr3_J32173	402	365	277	433	398	478	161	129	142	175	181	70	165	168	96	136	86	120	59	49	68	35	16	52	108	106	92	36	39	26	Predicted protein
Phatr3_EG01788	209	119	60	197	118	177	137	135	154	167	131	38	98	119	127	56	51	54	94	92	65	24	25	34	153	135	93	42	31	31	NA
Phatr3_J43040	2892	2427	6168	2292	2263	2143	2891	2766	2295	2976	2918	1362	1826	1883	1703	1751	1792	1537	1521	1322	1430	1819	1671	1681	1125	835	900	1404	1490	1352	Predicted protein
Phatr3_J43041	1218	1034	432	899	880	995	3251	3826	3527	3381	3205	1739	2369	3146	3134	2249	2190	2668	1578	2088	1732	1611	1342	1449	3001	2151	2330	1462	1444	1610	Predicted protein
Phatr3_J32176	461	483	224	473	399	417	573	623	495	598	610	253	507	543	515	361	260	389	544	533	532	401	360	321	680	482	558	409	380	377	Predicted protein
Phatr3_J43043	375	381	258	380	304	375	180	164	210	269	277	130	251	214	190	223	210	221	277	250	230	324	298	301	263	184	194	272	280	192	Predicted protein
Phatr3_J32178	382	441	322	382	359	376	148	107	154	198	168	118	289	279	279	413	298	323	241	178	164	287	314	305	118	109	96	229	264	209	Predicted protein
Phatr3_J43044	1061	830	746	885	896	1028	541	540	613	667	524	337	1569	1991	1669	1546	1521	1615	930	1060	1189	1090	904	1223	1618	1790	1684	1081	929	1123	Predicted protein
Phatr3_J9210	2905	2776	487	2447	2114	2649	602	462	664	1159	1174	718	1129	941	735	2796	2486	3165	2	4	10	142	152	244	4	9	0	258	225	210	CRTISO5 carotenoid isomerase 5	CRTISO5
Phatr3_J43046	1153	1091	82	670	561	661	665	650	914	600	573	309	493	467	401	377	327	316	672	440	484	528	460	505	574	347	374	462	480	499	Predicted protein	DSCYC3
Phatr3_J43047	596	575	287	467	407	510	191	180	171	317	272	143	279	314	332	327	297	293	552	416	384	536	457	471	458	308	338	471	491	476	NA
Phatr3_J32183	4	1	0	3	0	6	3	0	0	0	0	0	0	0	0	0	0	0	0	0	0	0	0	0	1	0	0	0	0	0	Predicted protein
Phatr3_J17779	1167	988	475	835	904	880	1237	1244	1338	1556	1550	915	1567	1752	1681	1797	1791	1831	2508	2695	2553	2894	2861	2575	2026	1522	1671	2272	2633	2358	Nucleosome assembly protein	P
Phatr3_J9137	496	407	584	612	429	505	92	40	72	93	74	55	15	13	11	19	9	3	7	6	6	4	4	8	6	12	9	7	11	0	Predicted protein
Phatr3_J24915	383	404	273	360	270	297	65	74	58	100	89	52	146	98	72	106	91	73	257	151	146	315	260	274	120	59	63	248	208	206	NA
Phatr3_J43051	2117	2337	302	2849	2810	3239	827	705	773	1226	1129	558	821	544	492	667	669	623	322	249	344	405	345	618	470	512	369	488	471	430	Predicted protein
Phatr3_J43052	316	263	166	321	244	312	160	143	171	189	168	111	94	99	90	143	114	98	48	31	39	84	85	84	53	26	23	75	98	65	Sodium/hydrogen exchanger
Phatr3_J9372	702	666	439	524	607	596	724	648	615	917	902	458	1656	1805	1549	2223	1756	2143	3715	3730	3732	6038	5268	5345	2048	1901	1810	4541	4298	4578	Predicted protein
Phatr3_J9017	277	287	106	274	260	248	254	280	273	341	315	177	360	365	419	332	282	381	415	463	479	470	480	423	432	348	378	409	400	420	Predicted protein
Phatr3_J32191	123	103	62	93	65	132	103	83	74	82	72	40	83	78	66	60	45	44	87	57	59	33	60	53	70	61	74	33	46	38	Predicted protein
Phatr3_J24922	572	513	373	507	497	459	710	645	565	750	689	380	786	856	913	854	842	812	1010	959	936	1106	1016	835	727	621	650	803	932	959	Predicted protein
Phatr3_J43055	706	634	415	421	592	520	791	754	742	1434	1233	703	1396	1689	1408	1886	1913	2257	4555	4124	3755	6056	5653	4891	2730	1886	2110	4629	4651	4592	Predicted protein
Phatr3_J43056	628	489	273	557	396	430	543	633	499	551	616	247	344	376	299	384	316	304	430	428	444	597	518	502	464	422	432	428	491	513	Predicted protein
Phatr3_J32195	540	450	496	395	427	402	668	628	565	657	610	246	561	600	538	553	571	486	404	380	356	491	456	350	364	454	388	334	458	359	Predicted protein
Phatr3_EG01842	0	0	0	0	0	0	0	0	0	0	0	0	0	0	0	0	0	0	0	0	0	0	0	0	0	0	0	0	0	0	NA
Phatr3_J43057	431	418	137	456	304	377	555	596	498	653	637	254	191	229	248	230	203	221	136	76	66	66	52	58	167	85	82	56	56	43	Predicted protein
Phatr3_J43058	1376	1270	481	1291	1031	1169	15834	18960	14966	14463	12979	5521	4128	8438	9016	4415	5228	6074	1025	2104	1444	708	632	630	4564	2747	3197	875	758	740	Calcyclin-binding protein	CACYBP
Phatr3_J32198	543	516	476	504	442	408	1655	1740	1399	1486	1354	752	731	1134	1212	669	837	699	269	444	311	206	229	237	578	437	511	205	205	216	NA
Phatr3_J17794	245	232	143	283	242	260	344	331	275	369	400	168	249	339	325	192	217	199	117	113	100	88	80	98	221	153	155	101	81	87	NA
Phatr3_J43060	1796	1467	1007	1512	1179	1203	7708	8209	6777	7055	6295	3206	2429	3742	4012	1971	2416	2770	748	1159	811	261	181	190	2168	1549	1672	323	226	253	Predicted protein
Phatr3_J43061	1834	1743	1075	1953	1555	1808	5056	5253	4303	4933	4531	2335	2581	3804	3825	2401	2869	3052	1123	1580	1325	897	884	790	2956	2247	2181	850	863	828	Predicted protein
Phatr3_J32202	388	324	122	399	338	440	1130	1097	1139	1438	1261	633	526	880	783	534	579	636	448	422	300	350	276	289	466	316	361	277	237	241	Lysine--tRNA ligase
Phatr3_J41701	365	285	111	288	263	284	443	391	371	509	439	226	419	516	483	438	413	459	583	620	588	662	552	562	530	496	490	552	527	556	Predicted protein
Phatr3_J43063	484	416	461	661	443	559	400	395	326	361	305	167	54	47	53	85	55	70	11	16	5	23	14	22	27	7	16	21	12	17	Predicted protein
Phatr3_J41702	2227	1954	422	1968	2082	2316	3781	3413	3713	4148	3878	2408	3483	4037	3457	4129	3540	4081	3689	3691	4061	4388	4017	4408	3358	4278	4150	3867	3639	3992	Predicted protein
Phatr3_J43065	171	161	42	169	137	144	102	75	108	143	128	58	121	142	147	109	118	81	230	237	248	172	168	181	226	231	205	143	135	189	Predicted protein	E2F1
Phatr3_EG01796	373	354	114	401	322	324	359	370	278	452	371	230	355	354	351	304	274	266	386	432	391	370	379	318	455	301	364	324	367	340	NA
Phatr3_J43067	185	219	187	202	156	209	133	110	127	146	126	74	126	115	107	96	85	83	183	143	147	174	144	114	100	113	109	98	154	124	Predicted protein
Phatr3_J43068	456	485	100	632	398	541	343	267	257	337	270	120	269	206	208	134	90	113	112	51	64	32	40	42	98	93	72	35	22	15	Predicted protein
Phatr3_J43069	569	503	160	481	384	440	279	252	278	368	338	188	274	218	175	461	399	497	6	3	9	21	30	49	14	3	9	33	40	30	Predicted protein
Phatr3_J43070	934	896	588	1248	984	1246	225	229	186	276	233	136	84	97	90	80	60	38	13	15	16	11	8	16	19	27	13	14	15	17	Predicted protein
Phatr3_J43071	554	404	268	441	340	411	516	440	353	582	532	230	450	381	271	332	291	272	559	410	425	437	490	471	235	251	181	377	410	390	Predicted protein
Phatr3_J43072	247	202	128	171	187	187	217	203	185	222	227	112	169	173	125	131	117	144	214	230	257	186	238	213	208	227	175	180	169	161	Predicted protein
Phatr3_J43073	392	427	119	434	392	436	105	80	110	144	88	73	156	107	126	122	80	69	168	159	178	183	120	113	181	161	173	121	134	110	Predicted protein
Phatr3_J43074	232	208	157	276	206	201	110	84	101	133	85	54	105	75	77	98	57	58	134	131	155	161	161	117	129	93	71	94	111	90	Predicted protein
Phatr3_J24935	259	267	48	212	150	242	197	193	195	278	228	95	162	149	134	170	169	146	178	180	207	153	151	159	268	139	167	159	170	137	Helicase_1
Phatr3_J43076	268	241	139	167	211	204	123	108	95	141	128	50	50	31	15	31	45	40	11	4	7	18	34	13	1	8	2	19	12	10	Predicted protein
Phatr3_J32218	835	812	626	1563	899	1439	121	115	117	157	139	47	220	244	215	221	268	257	311	306	254	539	395	391	381	246	243	459	527	496	Predicted protein
Phatr3_J32219	446	445	451	511	473	458	263	236	238	273	224	147	668	880	804	254	224	184	1291	1880	1674	225	258	231	4019	3757	3832	197	247	291	Predicted protein
Phatr3_EG02402	802	770	720	725	696	781	474	404	503	583	518	239	710	780	665	522	394	460	806	900	826	621	512	580	1444	1354	1374	502	481	481	Predicted protein
Phatr3_EG01862	21	13	0	12	7	9	31	20	26	44	28	26	16	23	15	13	20	20	19	36	31	35	32	22	12	19	17	30	49	39	NA
Phatr3_J43079	485	453	357	542	482	520	394	375	353	514	513	287	304	232	267	207	124	193	180	130	173	122	104	137	89	137	112	103	106	86	Predicted protein
Phatr3_J1690	1070	1127	349	750	870	903	189	238	207	377	258	180	692	754	610	976	795	809	1131	1110	1165	1931	1546	1842	808	622	784	1412	1428	1544	Predicted protein
Phatr3_EG01802	586	549	194	426	487	543	129	85	116	164	106	86	542	688	630	552	443	432	768	853	824	829	749	705	970	906	863	638	636	705	NA
Phatr3_J43081	1482	1503	823	1255	1394	1337	1618	1435	1491	1673	1494	820	1587	1890	1710	1737	1488	1597	1687	1785	1792	2216	2089	2017	1760	1399	1496	1880	1785	1950	Predicted protein
Phatr3_J9316	3252	3220	3074	4074	5369	4511	11901	13160	11467	12059	11284	5734	10367	14664	14189	13893	13394	14856	7816	10367	9849	13812	12918	11749	7108	5910	6583	11581	11530	12085	Predicted protein	SAD
Phatr3_J43083	27	34	0	27	12	32	20	18	14	10	9	7	22	34	19	22	29	11	50	23	31	32	34	27	63	42	51	24	15	19	Predicted protein
Phatr3_J43084	352	346	331	362	269	284	417	404	378	458	460	169	226	225	213	179	128	150	130	127	120	115	155	127	85	99	82	94	137	103	Predicted protein
Phatr3_J43085	787	737	114	779	594	856	416	391	316	405	349	170	356	348	322	199	258	188	286	257	304	159	172	223	369	276	260	198	211	149	Predicted protein
Phatr3_J43086	321	322	304	277	262	235	309	286	274	345	398	159	197	162	211	212	148	170	285	310	318	260	226	283	390	355	296	217	193	201	COP9 SigNalosome subunit 5	CSN5
Phatr3_J43087	39	31	17	22	23	11	2	2	19	13	20	12	8	7	8	16	16	16	41	10	35	90	7	16	10	17	6	15	14	12	Predicted protein
Phatr3_J43088	409	354	153	343	258	322	71	78	75	102	90	73	148	145	128	175	119	102	327	205	247	240	250	233	167	123	147	239	192	207	Predicted protein
Phatr3_J43089	335	290	105	309	253	259	187	223	209	250	277	123	232	245	244	234	202	185	286	246	279	281	285	227	365	208	249	255	253	206	NA
Phatr3_J43090	186	167	99	168	145	150	25	30	34	50	38	27	47	36	24	55	40	32	94	82	117	133	116	142	22	33	36	65	90	74	Predicted protein
Phatr3_J54038	331	305	56	238	247	273	268	240	206	385	457	170	642	764	577	726	745	730	1574	1337	1153	1916	1698	1457	994	686	653	1357	1557	1277	Regulator of chromatin silencing	SAS1
Phatr3_J43092	134	125	79	121	95	107	119	89	76	103	103	41	59	55	39	45	48	61	105	94	84	95	86	94	95	65	67	74	59	65	Predicted protein
Phatr3_J43093	157	154	87	151	149	164	127	129	114	152	114	62	153	126	96	89	86	104	123	122	151	135	138	132	157	132	103	120	101	122	Predicted protein
Phatr3_J9005	1293	1257	495	1103	988	1318	4790	4660	3574	4762	4582	1915	1756	2554	2224	1756	2061	2278	1328	1386	1404	1448	1303	1188	2233	1428	1604	1267	1138	1112	Predicted protein
Phatr3_J32237	1229	1094	714	1025	896	981	5186	5596	4721	4941	4844	2511	2680	4314	3950	2903	3055	3488	1364	2314	1782	1578	1354	1504	3408	2254	2577	1408	1285	1306	Predicted protein
Phatr3_EG02450	500	437	117	476	302	464	265	266	240	298	312	164	163	250	172	152	192	201	253	268	198	187	189	175	453	239	219	197	142	146	Predicted protein
Phatr3_J9158	151	133	84	96	78	100	35	23	48	41	30	22	107	106	72	86	33	51	104	83	99	86	80	63	89	86	97	78	96	69	Kinesin family-like protein	PT-KIF12
Phatr3_J43097	715	692	512	852	643	878	619	511	591	706	714	344	513	517	364	253	259	249	448	316	403	301	253	330	476	448	428	217	229	250	Predicted protein
Phatr3_J43098	225	239	69	157	143	169	41	23	34	66	47	27	81	65	66	65	51	50	66	47	73	101	97	112	40	41	23	83	90	97	Predicted protein
Phatr3_J43099	2372	2268	268	2212	1764	2330	404	316	321	560	555	259	1620	1678	1468	1961	1848	2130	285	213	291	700	643	888	168	215	219	832	730	672	1-acyl-sn-glycerol-3-phosphate acyltransferase	LPT1
Phatr3_J9259	663	592	937	714	606	578	448	360	394	547	545	242	703	703	742	758	632	613	590	724	616	659	730	648	575	529	500	649	661	691	Predicted protein
Phatr3_EG01827	115	95	50	111	74	102	41	52	62	58	70	20	51	41	31	41	27	31	82	64	61	57	36	45	101	45	56	56	52	38	NA
Phatr3_EG01873	27	28	0	31	19	25	15	12	20	17	26	8	17	7	20	3	7	8	19	18	14	18	8	12	31	10	17	32	14	17	NA
Phatr3_J43101	71	53	0	68	59	69	33	33	29	40	36	13	36	34	25	31	14	21	64	64	45	33	39	43	48	51	49	42	42	48	Predicted protein
Phatr3_EG01777	48	32	82	46	26	48	29	28	23	23	20	19	25	16	23	35	25	9	33	36	21	24	30	24	15	17	15	20	34	20	NA
Phatr3_J43103	550	546	96	481	447	442	665	736	683	831	713	384	383	419	377	456	395	393	416	356	387	483	476	473	377	250	236	380	400	384	Predicted protein
Phatr3_J32247	115	143	94	125	121	162	65	68	61	70	84	48	100	87	68	86	79	70	133	93	140	126	151	162	55	76	71	128	101	119	Predicted protein
Phatr3_J6300	0	0	14	0	0	1	0	0	0	0	0	0	0	2	0	0	0	0	0	0	0	0	0	0	0	0	0	0	0	0	Predicted protein
Phatr3_J43104	521	494	217	481	393	519	432	471	435	433	488	194	315	353	314	330	293	312	554	506	523	531	494	514	507	390	427	453	465	449	Predicted protein
Phatr3_J43105	394	376	296	464	446	438	656	601	584	696	633	347	383	443	458	321	357	386	744	781	731	942	816	760	609	625	605	626	599	740	Predicted protein
Phatr3_J32251	72	75	122	94	66	77	40	29	30	46	35	5	18	20	18	15	18	34	34	24	50	25	25	26	28	22	24	14	30	27	NA
Phatr3_J43106	760	727	186	590	565	634	457	552	487	565	564	309	552	465	405	467	450	427	686	684	612	689	664	706	695	535	629	588	618	619	Predicted protein
Phatr3_J32253	206	201	208	228	160	194	261	240	238	255	211	123	168	171	182	111	115	127	161	111	140	95	98	113	144	133	127	88	92	72	Predicted protein
Phatr3_J9576	1703	1426	1144	1477	1240	1303	2394	2364	1996	2502	2434	1125	1531	1621	1577	1498	1429	1464	1372	1423	1376	1460	1413	1342	1641	1262	1313	1183	1371	1316	Predicted protein
Phatr3_J32255	215	206	65	179	138	185	161	145	145	197	143	75	146	175	150	173	135	126	146	189	165	192	154	136	152	149	143	140	129	170	Predicted protein
Phatr3_J43109	449	380	76	451	339	419	311	337	281	387	329	126	350	385	408	298	333	374	338	320	332	292	259	280	520	347	290	227	282	293	Predicted protein
Phatr3_J43110	157	107	26	116	78	98	187	270	232	273	255	98	121	134	106	93	101	132	84	84	100	85	83	91	152	97	99	101	87	88	NA
Phatr3_J6025	754	621	233	655	493	566	412	417	332	498	478	208	339	356	317	263	245	203	374	398	325	328	308	343	418	419	364	289	312	317	Predicted protein
Phatr3_J43112	327	284	41	269	220	212	117	85	99	129	75	52	161	148	108	88	65	73	233	195	165	166	145	157	182	162	189	115	113	127	Predicted protein
Phatr3_J32260	100	93	16	75	113	120	254	326	210	315	272	104	138	130	139	70	73	50	207	215	201	67	80	75	588	365	411	58	50	67	Predicted protein
Phatr3_J32261	318	283	30	365	247	372	532	530	516	583	612	311	129	127	109	232	243	296	8	2	0	10	3	13	5	0	2	5	9	7	Predicted protein
Phatr3_J8821	0	0	0	0	0	0	0	0	0	0	0	0	0	0	0	0	0	0	0	0	0	0	0	0	0	0	0	0	0	0	Predicted protein
Phatr3_J43115	163	144	49	106	115	123	37	29	37	67	43	13	82	89	56	88	75	61	255	209	220	185	174	203	321	201	182	190	167	127	Predicted protein
Phatr3_J43116	751	644	196	685	655	750	611	672	556	788	762	314	291	214	200	204	229	197	244	154	166	240	212	253	97	101	103	191	203	227	Predicted protein
Phatr3_J43117	59	53	0	40	35	28	110	89	46	111	90	53	35	60	43	44	67	46	89	108	88	93	96	139	49	38	40	89	65	64	Predicted protein
Phatr3_EG01885	49	40	0	44	22	34	91	51	38	103	61	18	39	36	27	29	18	40	69	66	61	90	83	75	15	17	20	37	60	52	NA
Phatr3_J51454	313	325	251	250	268	242	373	384	314	388	322	209	355	408	351	357	368	251	326	323	344	347	278	291	459	427	385	284	333	294	NA
Phatr3_J9409	292	258	447	160	203	179	349	262	199	280	295	158	326	310	307	312	215	209	572	601	590	358	309	269	1025	842	858	286	321	305	Predicted protein
Phatr3_J43118	432	429	83	804	523	785	297	301	279	305	293	160	83	57	64	48	37	42	79	49	59	33	21	23	135	108	112	23	31	11	Predicted protein
Phatr3_J9617	3824	3591	963	3363	2993	3550	1697	1743	1745	2050	1847	1032	2633	2713	2406	3198	2967	3209	2753	2469	2521	4789	4315	3781	2117	1408	1341	3947	4424	4130	Predicted protein	BGS1
Phatr3_J43120	518	382	211	314	370	348	389	377	361	404	373	185	411	412	371	389	413	337	283	347	329	412	278	320	339	311	276	298	337	320	Phosphoglycolate phosphatase, PGPase	GPH
Phatr3_J43121	61	41	24	54	24	54	21	17	14	9	16	7	35	19	11	10	13	10	22	18	10	16	7	12	26	36	31	15	12	7	Predicted protein
Phatr3_J32272	1119	985	742	923	810	822	906	719	691	1115	978	536	1433	1247	1164	1154	1093	1170	1371	1604	1450	1612	1465	1346	1187	1086	1144	1264	1414	1374	NA
Phatr3_J43122	580	519	457	465	457	443	525	483	400	508	489	222	430	474	344	324	247	294	437	490	515	456	514	548	322	487	454	427	422	448	MAP65_ASE1
Phatr3_J32274	729	643	947	680	562	602	362	387	303	526	462	301	182	234	228	475	472	436	192	226	139	321	294	221	185	140	104	240	318	272	NA
Phatr3_J43123	11003	10097	6688	11258	8273	10071	671	495	518	1418	1203	717	293	179	204	1136	1020	1253	0	3	4	60	79	130	1	2	4	96	90	57	Predicted protein
Phatr3_EG01880	2589	2413	3921	2862	2341	2369	5234	4654	3150	5172	4418	2272	1877	2458	2657	2209	2365	2124	1552	1538	1399	1659	1939	1521	1166	1045	1099	1196	1540	1214	NA
Phatr3_J43124	490	447	268	432	392	471	1040	1132	1010	953	873	511	459	617	621	471	483	519	179	277	248	213	207	237	404	318	382	192	154	173	Predicted protein
Phatr3_J17846	7937	6722	10202	5867	5902	5320	8863	6430	5993	8970	8286	4696	9146	7990	7733	8253	7520	6751	9484	10316	10255	11726	11368	10321	6889	7779	7276	8876	10587	10141	Predicted protein
Phatr3_J43126	567	573	340	586	576	533	874	933	694	950	805	461	844	930	860	784	718	678	816	764	786	779	773	659	865	741	760	725	809	759	Predicted protein
Phatr3_J43127	1637	1518	968	1321	1237	1504	3465	3670	3377	3624	3157	1812	1348	1540	1334	1516	1353	1309	899	798	1095	1144	1195	1346	640	799	940	1125	1009	1156	Predicted protein
Phatr3_J43128	511	438	87	337	348	298	526	563	468	627	584	308	378	465	436	389	390	476	433	436	322	478	502	415	422	297	339	419	405	444	Predicted protein
Phatr3_EG01865	164	139	200	111	122	110	101	74	65	57	67	33	145	117	153	84	68	55	158	147	176	102	89	112	224	195	181	71	73	89	NA
Phatr3_EG01759	0	0	0	0	0	0	0	0	0	0	0	0	1	2	0	0	0	0	0	0	2	0	0	0	1	1	0	0	0	0	NA
Phatr3_J24978	3281	2912	3024	2931	2779	3093	2144	2136	2384	2616	2300	1295	2090	2367	2160	2033	2029	2032	1979	1909	1853	2079	1888	1926	1549	1635	1678	1733	1544	1688	Predicted protein
Phatr3_J43131	1511	1379	602	1455	1225	1352	505	480	406	715	625	280	557	417	369	710	568	652	50	8	23	88	93	131	8	6	6	132	84	89	Predicted protein
Phatr3_J43132	640	551	230	569	598	517	448	406	341	475	466	225	585	672	679	683	633	690	1105	1030	959	1276	1123	1136	884	738	705	948	941	1066	Predicted protein
Phatr3_J32285	511	471	493	473	413	385	341	253	198	282	326	179	304	239	302	297	283	174	289	273	308	327	258	313	187	216	228	242	234	271	Predicted protein
Phatr3_J32286	68	51	70	36	32	46	11	6	15	11	14	0	11	4	6	10	6	12	3	9	13	24	23	15	0	6	7	14	23	21	Predicted protein
Phatr3_J43133	435	379	182	265	307	331	307	312	255	374	359	168	363	381	323	405	374	384	401	428	381	524	486	543	232	343	270	418	418	427	Predicted protein
Phatr3_J43134	609	529	260	600	498	569	421	338	380	485	424	241	301	310	262	242	235	185	415	328	349	321	334	292	437	377	313	262	324	244	Predicted protein
Phatr3_J43135	629	624	323	416	477	389	668	687	685	946	980	512	911	1022	874	954	981	1058	3354	2921	2803	3825	3671	2700	2224	1436	1519	2643	3082	2669	Predicted protein
Phatr3_J32290	149	165	22	118	115	100	58	55	57	89	73	28	95	85	78	72	79	100	120	120	137	149	94	82	120	67	84	108	109	99	Predicted protein
Phatr3_J43136	820	644	547	606	492	672	403	383	388	434	425	240	594	547	548	596	546	568	846	749	715	1004	834	802	770	581	597	920	810	868	Predicted protein
Phatr3_J32292	1143	1060	1130	1084	1025	1078	1703	1624	1339	1759	1644	773	880	920	758	686	646	615	1016	1042	946	684	702	741	1517	1296	1215	579	622	590	Predicted protein
Phatr3_J43138	341	403	347	374	361	355	179	130	156	202	239	133	591	571	622	336	316	310	959	1079	896	461	390	330	1843	1130	1135	358	447	354	Predicted protein
Phatr3_J32294	123	136	86	75	100	87	44	54	39	72	61	39	4301	5749	4870	533	514	576	8117	10268	11514	1338	1145	1338	12065	17284	19371	1252	1208	1608	Protein fucoxanthin chlorophyll a/c protein	LHCR8
Phatr3_J8763	172	127	0	144	136	132	49	65	67	64	61	48	85	75	42	40	43	32	53	50	51	41	49	35	104	75	75	40	27	41	Uracil-DNA glycosylase
Phatr3_J43140	300	234	308	299	237	233	154	143	133	162	170	69	136	93	83	78	52	47	81	53	87	47	43	53	133	102	87	39	39	35	Predicted protein
Phatr3_J1785	583	514	111	563	445	519	358	384	280	451	517	195	284	369	368	300	334	354	497	423	477	571	538	598	552	364	387	476	491	482	NA
Phatr3_J17860	947	1011	864	1529	907	1180	1297	1156	940	1493	1263	562	147	110	133	98	93	94	31	21	29	9	10	16	34	44	37	19	18	16	Predicted protein
Phatr3_J43143	714	649	538	795	502	607	1727	1671	1225	1463	1242	528	275	235	246	150	155	169	129	161	154	83	73	86	159	170	177	72	89	70	NA
Phatr3_J43144	843	799	332	822	720	771	1152	1118	1013	1248	1174	548	740	770	702	686	617	614	826	733	754	783	739	616	657	568	516	686	671	726	Predicted protein
Phatr3_J51460	169	147	47	152	149	184	245	207	172	294	217	136	353	402	283	364	287	313	626	649	778	723	612	725	516	564	536	540	505	648	NA
Phatr3_EG01801	1058	760	348	804	697	843	1674	1589	1096	1760	1822	726	682	760	618	826	779	758	814	731	746	974	1016	947	596	559	521	935	808	771	NA
Phatr3_EG01779	220	152	144	201	212	196	104	52	63	110	75	41	123	121	118	109	114	84	110	130	120	120	112	105	65	80	96	88	85	91	NA
Phatr3_J43146	1675	1402	424	1149	1229	1239	1312	1246	1396	1458	1327	756	1480	1796	1583	1769	1667	1898	3175	3081	2827	3349	3195	2876	2639	2082	2311	2688	2861	2709	Predicted protein
Phatr3_J17862	3309	3271	1358	2575	2605	2960	3698	4008	3632	5461	5239	2560	4042	4467	4261	4692	4852	5031	5443	5097	4994	6645	6457	6135	4240	2972	3202	5814	5742	5433	Predicted protein
Phatr3_J43148	443	444	199	464	433	406	465	456	369	511	482	215	355	380	356	322	341	338	350	454	320	381	339	315	548	481	427	297	338	289	Predicted protein
Phatr3_J24996	956	748	538	753	761	778	717	765	659	935	897	404	740	846	692	789	616	727	753	819	777	873	759	924	868	741	733	705	734	711	Predicted protein	SEC13
Phatr3_J43150	216	227	16	209	131	180	118	137	113	186	145	85	105	121	90	169	143	157	128	143	143	225	190	182	102	65	52	184	188	157	Predicted protein
Phatr3_J54048	777	601	216	610	446	618	577	701	653	953	757	402	749	800	730	900	928	1035	292	248	321	515	548	526	222	194	172	504	458	468	Tubby-like transcription factor	TLTF1
Phatr3_J43152	11203	10159	23511	10680	10208	9823	42503	42962	32517	40429	36333	17173	9564	12397	12797	6627	6448	6706	1859	2708	2287	756	658	655	3996	3656	3721	607	565	522	Peptidyl-prolyl cis-trans isomerase
Phatr3_J25000	2515	2276	2850	2301	1937	2092	3800	3961	3260	3666	3470	1614	2528	3074	3120	1923	1962	1977	1415	1565	1427	1019	915	881	2300	1793	1800	811	965	916	Predicted protein
Phatr3_J43154	496	437	123	490	408	443	217	186	214	264	277	114	431	436	367	404	343	336	228	227	251	313	286	318	257	265	250	312	256	321	Predicted protein
Phatr3_J32311	904	771	568	895	698	806	135	101	173	164	147	81	636	687	535	483	447	406	636	698	697	530	453	460	1048	885	819	485	532	500	Predicted protein
Phatr3_J43155	193	190	60	124	126	187	123	128	175	153	161	64	132	132	140	145	149	114	224	232	227	256	252	258	158	120	169	222	202	234	Predicted protein
Phatr3_J54049	202	227	96	213	169	186	105	106	104	201	185	73	239	239	230	257	224	188	359	362	350	412	368	368	436	336	371	367	390	393	NA
Phatr3_EG01848	1250	941	1318	906	828	749	1394	1066	796	1261	1116	584	1013	1050	1074	1005	875	747	788	801	770	865	723	808	594	690	708	615	714	713	NA
Phatr3_J32314	278	244	192	321	182	246	161	156	132	212	189	94	141	144	96	89	60	84	139	114	147	103	115	101	99	119	101	96	96	83	Predicted protein
Phatr3_J32315	348	251	188	272	241	296	154	145	126	157	160	73	130	125	111	166	186	151	138	139	143	146	214	187	65	68	82	114	163	129	Predicted protein
Phatr3_J32316	1963	1609	1925	1756	1460	1568	1520	1410	1161	1510	1589	818	2050	3486	3464	4263	5160	4632	807	879	764	1160	1173	1048	919	697	795	1250	1320	1178	Predicted protein
Phatr3_J43157	4366	3652	3391	3933	3145	3303	1508	1576	1578	1937	1816	1030	207	119	130	1028	833	983	3	2	6	67	61	91	5	0	3	50	62	47	Predicted protein
Phatr3_J43158	223	176	32	201	170	187	460	539	427	490	487	222	236	263	210	213	206	250	250	237	265	254	214	245	332	224	250	238	222	264	Predicted protein
Phatr3_J43159	1360	911	487	874	758	972	719	641	555	1011	874	388	696	931	726	759	972	944	1078	904	1066	1480	1373	1208	828	630	680	1445	1244	955	NA
Phatr3_J43160	60	53	31	59	36	57	436	479	415	458	374	156	34	22	19	19	20	21	32	35	25	11	14	8	65	40	42	5	15	13	Predicted protein
Phatr3_J43161	370	386	102	288	237	289	242	219	295	291	322	164	236	245	247	256	185	283	724	705	681	829	682	657	701	505	560	571	630	542	Predicted protein
Phatr3_J43162	0	0	0	0	0	0	1	0	0	0	0	0	0	2	0	0	0	0	0	0	1	0	0	1	0	1	0	0	1	0	Predicted protein
Phatr3_J43163	79	59	85	66	43	25	12	9	16	19	16	18	62	52	79	52	32	32	83	94	92	102	96	66	107	78	96	92	66	80	Predicted protein
Phatr3_J43164	277	249	101	224	220	269	82	50	60	82	99	63	18	30	14	27	20	21	16	30	30	36	23	23	10	23	15	14	29	12	Predicted protein
Phatr3_J43165	166	150	172	252	143	203	126	113	116	115	113	45	40	40	25	22	8	12	39	14	26	11	10	14	29	50	31	26	17	8	Predicted protein
Phatr3_EG02464	1626	1433	361	1111	1399	1284	1703	1613	1929	2106	2140	1382	2200	2590	2447	2872	2477	2779	3181	3435	3384	4571	4150	4007	2229	2142	2186	3458	3396	3702	Predicted protein
Phatr3_EG02194	1041	949	1008	1079	972	1062	1279	1246	1081	1480	1275	653	705	699	733	587	589	525	610	553	617	539	477	517	597	528	479	453	467	453	Predicted protein
Phatr3_J43168	19	27	16	22	33	34	19	11	23	19	19	2	31	19	13	16	10	7	23	23	30	20	18	27	9	21	18	16	18	12	Predicted protein
Phatr3_J9280	126	120	164	191	157	187	442	571	445	467	423	199	157	192	176	124	150	93	96	120	95	99	70	105	166	154	179	77	72	113	Predicted protein
Phatr3_J43169	1875	1655	641	1450	1560	1565	64	55	73	154	111	91	2289	2470	2152	2172	1913	2092	1272	1506	1519	1814	1371	1704	1918	1914	1806	1710	1519	1731	Predicted protein
Phatr3_J5928	2379	2252	1268	2198	2109	2467	1083	949	1100	1388	1337	680	1280	1154	1040	1542	1420	1588	311	194	227	644	659	718	70	85	80	575	567	514	Precursor of protein zeaxanthin epoxidase-like protein	ZEP2
Phatr3_J43171	183	180	139	306	165	269	19	17	17	24	28	22	23	16	21	27	40	37	5	3	4	8	25	10	6	2	3	12	5	12	Predicted protein
Phatr3_J9348	397	434	327	370	389	340	165	154	172	225	236	98	287	281	202	317	281	250	228	208	189	276	251	322	172	177	159	265	255	253	Predicted protein
Phatr3_J17885	1466	1191	1253	1432	995	1007	1689	1330	748	1417	1106	732	1676	1704	1579	1341	1382	968	1287	1551	1574	1350	1208	1284	835	1025	1006	906	985	1002	Predicted protein
Phatr3_EG01775	122	111	136	64	99	87	104	80	66	123	123	46	170	184	185	116	190	145	367	300	286	413	379	310	186	150	167	292	294	248	NA
Phatr3_J9612	336	309	213	278	255	334	154	177	192	233	201	160	362	679	705	544	654	691	353	355	339	397	350	327	312	298	275	288	310	312	Predicted protein
Phatr3_J43174	1090	836	601	869	739	892	293	281	340	352	301	194	846	1150	1244	630	711	615	407	364	417	521	504	568	328	292	272	495	420	451	Predicted protein	TPT4
Phatr3_J43175	378	475	0	1748	1479	1826	227	185	225	322	315	164	45	22	27	29	40	17	14	8	9	23	16	13	31	12	11	9	22	9	Predicted protein
Phatr3_J43176	1235	996	325	1090	946	1111	823	846	625	921	895	453	743	815	750	869	670	727	829	875	786	906	871	944	888	687	710	755	816	799	Predicted protein
Phatr3_J43177	316	320	108	371	230	316	75	57	78	76	69	45	119	78	68	61	43	62	68	48	63	48	38	61	44	52	60	51	52	35	Predicted protein
Phatr3_J32339	76	48	18	39	42	52	51	53	43	66	45	34	45	46	54	44	40	43	61	50	47	77	49	58	34	48	66	44	37	39	NA
Phatr3_EG01845	26	36	3	53	36	20	11	25	22	28	13	16	31	18	31	21	26	13	35	43	42	23	38	23	26	21	32	33	36	26	NA
Phatr3_EG01877	15	34	40	18	25	22	56	39	42	81	41	27	46	43	29	50	53	17	43	45	35	38	35	35	52	38	47	33	23	31	NA
Phatr3_EG01866	0	0	0	0	0	0	0	0	0	0	0	0	0	0	0	0	0	0	0	0	0	0	0	0	0	0	0	0	0	0	NA
Phatr3_J32340	0	0	0	0	0	0	0	0	0	0	0	0	0	0	0	0	0	0	0	0	0	0	0	0	0	0	0	0	0	0	Predicted protein
Phatr3_EG01791	0	0	0	0	0	0	0	0	0	0	0	0	0	0	0	0	0	0	0	0	0	0	0	0	0	0	0	0	0	0	NA
Phatr3_J9309	136	167	52	146	126	145	100	92	76	106	106	43	109	114	121	107	72	53	161	172	186	102	121	122	191	200	184	129	140	120	Predicted protein
Phatr3_J32342	22	19	71	22	26	27	2	4	7	5	11	2	10	7	26	9	9	6	15	14	20	27	24	21	25	16	13	11	10	15	Predicted protein
Phatr3_J43179	417	334	187	345	266	277	312	330	218	316	305	143	219	333	241	253	252	242	262	269	265	368	326	257	211	196	226	314	271	308	Predicted protein
Phatr3_J43180	483	430	117	426	337	437	197	184	163	273	241	142	196	179	162	185	126	148	405	460	397	458	464	389	341	252	253	329	304	344	NA
Phatr3_J32345	254	224	131	236	206	211	126	103	117	117	87	49	97	87	72	93	75	74	129	130	154	167	141	137	131	123	90	127	139	145	Predicted protein
Phatr3_J43181	473	469	450	624	416	560	486	474	363	532	401	208	351	344	325	193	158	179	193	247	216	127	121	205	356	374	381	157	154	165	Predicted protein
Phatr3_J43182	206	178	67	214	176	163	114	137	104	179	145	58	101	91	69	52	39	47	114	95	109	60	71	83	182	157	155	61	62	45	Predicted protein
Phatr3_J43183	208	203	28	215	211	185	168	202	141	219	193	89	226	197	188	188	152	197	304	285	283	344	308	269	290	230	234	239	214	280	Predicted protein
Phatr3_J43184	196	158	192	221	218	176	251	241	262	293	292	103	160	176	158	139	164	146	174	160	160	215	148	149	137	104	125	171	155	151	Predicted protein
Phatr3_EG01851	403	365	207	357	312	324	478	541	439	624	504	329	392	400	405	362	338	328	308	369	286	354	365	321	421	362	314	299	313	289	NA
Phatr3_J17895	2424	2068	1285	2012	2014	2039	888	809	1037	1268	1246	791	1414	1435	1564	1560	1539	1739	1628	1529	1419	1976	1789	1975	869	886	900	1594	1523	1535	Predicted protein
Phatr3_J43187	154	132	103	181	130	188	71	60	36	91	66	45	90	116	96	81	89	69	122	138	177	135	148	127	166	127	146	113	134	103	Pds-like2, phytoene desaturase-like protein
Phatr3_J43188	25	18	6	20	20	21	27	23	18	35	16	10	10	11	6	18	14	5	12	8	15	3	6	12	20	27	10	13	8	3	Predicted protein
Phatr3_J9308	20	21	1	24	37	39	38	34	57	43	59	28	28	21	18	18	22	33	33	15	23	19	15	22	18	14	24	25	20	28	NA
Phatr3_J54051	82	77	95	95	81	77	6	9	15	7	17	3	46	30	23	29	28	32	63	61	67	55	62	52	43	29	31	71	76	58	NA
Phatr3_J43191	0	0	0	0	1	0	3	0	0	3	1	0	0	1	1	0	1	0	0	1	0	0	2	0	0	0	0	0	0	1	Predicted protein
Phatr3_J9211	64	43	47	53	31	37	73	65	71	59	84	29	27	38	50	51	41	47	48	38	45	43	36	60	33	26	31	38	41	47	Predicted protein
Phatr3_J8754	166	130	75	145	142	119	65	50	55	89	91	73	95	84	53	79	54	58	138	78	116	125	103	75	72	74	66	78	127	103	Predicted protein
Phatr3_J43194	559	481	169	480	462	542	312	261	325	439	413	225	610	765	613	771	671	766	310	235	276	454	498	516	162	173	166	444	442	470	Predicted protein	PTSLC4-6
Phatr3_J7961	309	259	120	264	247	235	221	212	217	263	213	119	216	170	137	165	174	165	365	290	282	371	333	304	347	248	271	278	291	298	Predicted protein
Phatr3_J43196	508	461	387	488	313	372	275	268	191	303	290	106	248	229	170	126	132	167	284	209	218	224	191	222	247	222	169	160	163	163	Predicted protein
Phatr3_J3281	152	142	0	71	64	118	91	92	112	126	110	58	88	42	38	50	42	64	79	62	61	44	52	47	68	48	41	53	20	37	NA
Phatr3_J17909	242	268	224	217	179	233	157	113	114	173	141	82	187	165	151	149	128	118	282	273	271	219	249	221	250	234	229	215	201	174	NA
Phatr3_J8860	258	242	70	236	143	230	616	546	412	591	535	225	293	312	293	263	254	258	217	274	213	269	201	189	268	250	244	232	197	197	NA
Phatr3_J32365	259	241	41	213	198	218	18	21	14	47	42	22	303	378	325	342	325	346	205	272	211	430	339	257	293	244	209	285	321	388	Predicted protein
Phatr3_J17914	110	134	4	57	87	70	387	425	309	368	312	178	100	104	104	70	64	103	132	124	159	110	132	117	190	138	143	98	75	82	Predicted protein
Phatr3_EG01786	17	13	0	17	12	11	49	42	40	37	42	16	16	19	31	6	9	12	19	21	24	13	15	22	33	24	27	12	8	10	NA
Phatr3_J9355	578	505	371	517	568	486	615	613	527	757	704	413	371	392	360	483	433	430	648	566	600	936	930	750	323	307	329	673	731	654	NA
Phatr3_J43202	616	576	132	456	493	511	408	368	344	405	488	229	331	351	284	436	415	380	481	365	414	633	583	577	300	311	236	480	473	511	Predicted protein	SLY1
Phatr3_J9223	493	488	114	538	430	517	198	193	201	266	234	87	556	502	502	515	474	517	258	273	264	371	370	437	323	266	284	407	403	363	Predicted protein
Phatr3_J9258	1167	1180	847	1186	956	1162	77	54	157	120	143	97	731	532	521	908	851	963	32	10	27	226	256	361	21	18	10	292	289	236	1-deoxy-d-xylulose-5-phosphate reductoisomerase	DXR
Phatr3_J43205	1410	1376	1286	949	1314	1133	578	721	585	782	695	351	1526	2020	1732	1786	1567	1699	1561	1972	1873	2432	2103	2070	2148	1730	1599	1820	2021	2151	Predicted protein
Phatr3_J8706	1000	804	622	1186	848	1051	250	179	218	300	253	128	137	221	207	122	135	89	452	374	376	385	389	315	359	333	367	243	276	220	NA
Phatr3_J43207	1032	930	179	911	801	919	984	1050	979	1230	1179	546	1133	1358	1151	1199	1284	1265	1352	1122	1260	1467	1395	1379	1523	1116	1179	1524	1494	1393	Predicted protein
Phatr3_J43208	318	314	147	278	295	288	394	454	495	496	518	301	277	322	296	413	364	381	263	261	282	334	362	367	295	228	215	331	300	287	Predicted protein
Phatr3_EG02449	3375	3003	631	2527	1918	2414	571	415	583	1505	1475	747	291	268	209	1932	1761	2104	39	25	23	137	133	105	34	32	15	152	111	92	Predicted protein
Phatr3_J17928	948	814	367	850	704	739	162	136	116	247	218	105	244	193	163	389	293	338	315	228	255	532	487	434	169	131	126	353	437	410	NA
Phatr3_J43211	199	166	0	176	103	162	66	80	99	107	97	56	92	117	92	130	98	134	134	148	132	206	181	185	154	116	105	162	134	143	Predicted protein
Phatr3_J43212	411	378	272	379	281	320	173	155	156	227	198	132	234	236	211	194	217	166	394	281	320	344	365	318	351	238	262	291	357	290	NA
Phatr3_EG02176	1479	1351	146	1028	833	1213	1297	1439	1429	1563	1599	778	1448	1623	1321	1768	1885	1936	1535	1379	1321	2009	1728	1768	1891	966	1066	1863	1655	1556	Predicted protein
Phatr3_EG02168	0	0	0	0	0	0	0	0	0	1	2	0	0	0	1	0	0	0	0	0	0	0	0	0	0	0	0	0	0	0	NA
Phatr3_J43213	563	501	292	618	469	604	197	163	158	199	191	96	173	90	111	87	81	70	152	108	120	139	157	130	93	94	89	151	96	96	Predicted protein
Phatr3_J43214	165	143	29	112	107	105	125	101	146	145	113	56	154	132	111	127	122	110	164	181	138	194	187	163	172	173	142	173	168	143	Predicted protein
Phatr3_J43215	576	603	400	421	508	451	930	874	674	803	762	380	620	698	716	601	560	453	665	803	726	714	712	604	725	654	628	555	654	597	Predicted protein
Phatr3_J8890	152	125	30	127	84	156	105	109	132	104	126	61	98	126	96	105	67	71	134	130	157	114	99	144	123	118	112	119	88	135	Predicted protein
Phatr3_J43217	363	342	96	295	289	332	228	260	222	292	223	156	260	264	287	241	184	244	430	407	448	329	397	344	501	407	374	321	352	329	Predicted protein
Phatr3_J43218	85	85	42	54	69	71	50	38	41	47	54	36	114	97	124	87	74	96	174	168	166	203	197	130	178	147	167	197	164	120	Predicted protein
Phatr3_J43219	804	668	341	583	637	754	728	738	662	952	894	380	771	998	832	794	931	935	1305	1170	1113	1464	1288	1269	1411	960	1087	1248	1252	1105	Predicted protein
Phatr3_J43220	609	517	40	238	196	404	219	286	206	299	277	180	144	155	106	199	160	221	233	176	212	279	275	314	168	104	101	299	227	244	NA
Phatr3_EG01770	928	926	1910	1003	708	770	297	271	245	448	419	212	278	276	195	279	310	223	498	219	291	568	611	472	234	123	117	405	472	370	NA
Phatr3_J43221	342	288	77	199	190	210	178	126	193	127	115	60	229	210	141	154	154	124	305	236	289	272	196	229	284	216	267	227	228	222	Predicted protein
Phatr3_J43222	981	856	1170	745	739	787	288	240	435	458	468	288	977	842	757	943	814	975	1337	1131	1214	1649	1616	1386	582	630	600	1270	1308	1303	Predicted protein
Phatr3_J32390	537	475	221	302	372	345	256	264	302	281	332	162	466	368	380	351	339	378	344	377	332	420	452	404	247	255	242	328	424	397	Predicted protein
Phatr3_J43223	124	85	25	90	76	75	170	121	107	219	209	63	70	117	71	98	70	80	64	51	47	81	80	83	18	19	13	53	46	41	Sulfhydryl oxidase
Phatr3_J43224	2418	2066	1664	1954	2026	2064	1743	1656	1560	2028	1917	960	1076	1013	789	1532	1257	1233	747	564	635	1420	1407	1234	419	355	385	1056	1095	1024	Sulfhydryl oxidase
Phatr3_J9411	400	356	103	278	281	271	241	295	232	367	320	164	251	317	272	306	269	278	276	302	339	335	310	367	327	251	277	329	283	301	30S ribosomal protein S15
Phatr3_J43225	455	473	920	414	439	440	297	209	240	342	311	181	533	570	469	556	475	497	603	606	628	868	750	796	283	294	331	605	589	660	Predicted protein
Phatr3_J43226	262	242	39	279	275	226	310	290	293	388	380	185	244	386	271	289	276	273	473	462	469	556	498	495	507	419	425	414	428	468	Predicted protein	CYCP5
Phatr3_J9570	224	169	88	222	173	192	177	208	162	236	192	86	183	152	168	132	143	153	92	84	79	57	70	99	102	109	88	63	63	71	Predicted protein
Phatr3_J43228	292	284	122	351	265	301	244	194	222	304	264	105	130	137	111	139	98	98	127	75	79	88	93	102	81	81	75	80	71	74	Predicted protein
Phatr3_J43229	583	540	247	556	569	520	400	475	368	608	575	309	441	520	536	733	685	583	481	527	482	791	772	709	367	370	336	666	718	661	Predicted protein
Phatr3_J43230	339	356	221	379	328	341	294	275	219	307	300	133	211	232	210	166	181	182	255	228	266	279	274	259	282	303	185	224	223	226	Predicted protein
Phatr3_J2782	414	395	169	331	313	289	223	203	213	297	274	145	228	221	162	181	215	179	306	259	287	341	276	369	147	129	177	319	271	278	Predicted protein
Phatr3_J32401	656	507	43	311	540	408	23	11	14	9	22	21	900	1165	824	1436	1004	901	1500	1884	1994	3485	2298	2641	1435	2261	1739	2409	2597	3492	Predicted protein
Phatr3_J43232	412	485	163	399	521	441	3	14	10	30	22	16	201	254	140	350	215	206	283	354	362	841	456	635	333	512	404	540	572	783	Predicted protein
Phatr3_J43233	2341	2124	1148	1653	2051	2059	840	819	1002	1126	936	562	6418	8056	6721	6176	5228	5447	3987	4505	4906	5381	4252	4991	6510	7185	6513	4757	4841	5562	Predicted protein
Phatr3_J43234	188	170	108	239	221	205	375	403	309	423	406	145	181	137	120	163	93	90	136	84	115	129	79	82	172	150	130	106	134	113	Predicted protein
Phatr3_EG02447	263	223	82	249	230	263	26	34	24	54	62	19	157	165	183	184	133	142	223	238	231	255	244	229	208	217	244	195	234	174	Predicted protein
Phatr3_J8363	581	500	512	453	405	419	259	234	237	329	255	149	520	503	528	477	359	340	697	731	764	881	798	725	490	554	496	623	720	692	Predicted protein
Phatr3_EG02439	282	268	204	239	178	221	161	142	143	253	234	104	99	120	90	110	144	85	191	120	120	185	184	149	109	88	96	159	173	154	Predicted protein
Phatr3_J43237	3121	3113	947	3148	3032	3184	1605	1328	1189	1846	1596	845	2426	2414	2362	2234	2116	2096	1117	1245	1452	1199	1112	1499	1797	1451	1434	1362	1190	1232	Predicted protein
Phatr3_J43238	288	251	80	323	233	275	288	228	240	359	307	138	54	61	27	76	54	73	5	2	2	20	8	18	2	1	1	20	3	8	Predicted protein
Phatr3_J17936	688	560	216	622	537	601	520	536	526	537	577	343	465	467	417	389	369	422	406	350	352	469	431	464	268	227	237	373	342	316	Predicted protein
Phatr3_J32411	341	281	160	264	244	298	424	360	331	350	337	224	368	387	334	347	288	285	308	359	390	333	290	302	353	308	386	314	308	318	Predicted protein
Phatr3_J32412	251	208	119	190	245	249	138	145	150	160	211	89	169	168	142	173	113	137	245	284	277	277	260	235	258	207	241	230	168	190	Anaphase promoting complex subunit 5
Phatr3_J43240	104	80	42	62	84	74	208	177	164	229	160	99	369	404	329	200	179	192	479	557	637	176	157	211	922	1169	1176	191	158	179	Violaxanthin deepoxidase-related, chloroplast	VDR
Phatr3_J25067	865	752	1003	781	744	855	541	553	459	685	686	355	529	526	484	586	559	547	660	554	568	668	699	694	572	539	481	613	563	637	Predicted protein
Phatr3_J50695	3489	3246	3328	3636	3392	3172	4826	4780	3460	4869	4487	2113	2964	3348	3400	2873	2698	2537	2736	3152	2854	2626	2524	2504	3050	2982	2969	2231	2462	2363	Histone H3	H3-1C
Phatr3_J8828	214	195	131	177	214	176	224	215	219	277	251	99	205	278	260	177	206	188	254	245	242	294	211	229	326	286	275	238	218	191	Predicted protein
Phatr3_J43243	302	258	213	305	300	289	260	252	215	264	261	160	276	241	207	183	140	170	223	214	201	136	147	140	281	246	262	146	133	136	Predicted protein
Phatr3_J43244	681	635	557	620	622	569	750	782	586	872	658	384	619	672	691	475	495	358	502	618	577	479	423	437	867	793	675	384	459	437	Predicted protein
Phatr3_EG02180	1930	1660	924	1553	1687	1890	1933	1723	1480	2146	2040	1024	1716	1923	1461	1986	1689	1912	1681	1530	1778	2225	2068	2268	1184	1375	1530	1890	1832	1971	Predicted protein
Phatr3_EG02164	1247	1286	1176	1446	1284	1495	2473	2559	2092	2633	2278	1049	1050	1498	1340	650	727	887	465	511	412	107	110	127	1593	1030	1165	143	101	113	NA
Phatr3_J17948	802	681	317	634	556	566	555	589	477	688	550	327	471	494	471	601	585	574	477	496	558	851	793	828	311	373	377	729	626	669	Chromatin assembly factor subunit c	NURF-55
Phatr3_J8765	550	562	575	534	500	540	404	408	481	466	369	312	148	139	116	192	169	154	112	73	69	190	177	211	14	26	18	113	106	132	Predicted protein
Phatr3_J17954	5938	5332	11252	5226	4814	4797	10426	9369	7349	11166	9735	4821	8895	8873	8463	9228	8222	7725	7595	8402	8329	10287	9832	8998	6009	5932	5981	7941	8961	8314	Predicted protein
Phatr3_J8694	162	146	62	134	116	115	213	169	182	227	214	111	205	207	255	194	209	225	260	276	213	293	286	244	250	135	163	242	229	230	Predicted protein
Phatr3_EG01819	182	129	53	113	101	100	51	37	17	35	27	14	48	54	45	64	57	20	73	79	71	96	87	99	21	36	37	52	64	58	NA
Phatr3_J3969	936	755	572	761	729	840	367	320	455	634	633	345	52	45	42	319	204	252	3	0	1	50	33	75	0	0	3	45	40	38	Predicted protein
Phatr3_J8777	462	446	496	274	418	361	634	683	534	945	889	431	967	1168	1065	1104	1122	1262	1600	1732	1590	2162	1912	1632	1131	940	914	1542	1577	1435	Predicted protein
Phatr3_J43251	13780	11622	15662	10112	9809	9076	16828	13624	12061	15888	14774	7536	14053	14711	15192	14603	13416	12333	12043	14215	14015	14773	14787	12789	10524	11195	11519	12359	12998	13906	Predicted protein	ARF1
Phatr3_J43252	592	557	487	528	515	480	332	327	343	431	407	187	306	301	302	201	185	152	189	219	240	149	146	179	263	237	240	152	169	114	NA
Phatr3_J8982	284	330	65	407	310	400	239	195	160	271	257	141	147	175	143	197	169	149	236	244	217	360	334	274	124	97	89	287	271	208	Predicted protein	PGAM_2
Phatr3_EG02446	122	92	0	122	95	78	98	69	74	102	102	67	54	60	33	28	22	34	85	85	84	89	106	87	35	33	32	62	37	41	NA
PTsRNA00018a	1	3	0	4	4	1	1	0	2	1	8	2	0	7	2	0	0	0	6	3	4	4	5	3	0	3	0	1	1	0	NA
Phatr3_EG01825	278	231	288	226	177	210	85	62	90	126	85	44	166	119	101	154	137	110	134	109	114	201	229	140	51	56	60	121	131	129	NA
Phatr3_J9241	2003	1901	1112	1741	1624	1715	415	367	373	679	559	330	1363	1388	1278	1418	1478	1480	646	452	539	757	707	758	474	468	472	739	674	651	Predicted protein
Phatr3_J17974	338	321	258	195	284	232	559	488	473	633	630	368	843	1005	901	1042	1001	974	2151	2148	2171	2667	2685	2261	1126	1165	1186	1932	2092	2175	NA
Phatr3_J54064	888	794	682	852	703	909	431	366	355	581	484	237	736	718	682	655	680	767	585	484	535	392	354	407	701	489	509	374	379	297	NA
Phatr3_J43258	235	189	31	156	162	202	19	18	27	25	15	11	29	12	3	25	15	7	48	25	24	74	62	67	12	1	13	56	48	40	Predicted protein
Phatr3_J43259	100	74	25	87	68	103	38	26	28	45	38	21	49	37	32	40	21	37	86	91	93	113	73	108	77	60	78	91	75	78	Predicted protein
Phatr3_J32434	1240	1063	290	1068	989	948	1102	1060	937	1111	1092	548	1299	1474	1308	902	761	849	1416	1668	1478	1081	1114	943	1825	1535	1626	922	1032	993	Predicted protein
PHATRDRAFT_54065	659	607	462	215	180	182	4275	5400	3371	1696	1496	553	28420	39089	40164	2570	2306	2632	60053	81098	71958	4510	3999	3486	133025	100366	100037	4298	4307	4282	Protein fucoxanthin chlorophyll a/c protein	LHCX2
Phatr3_J9323	3170	2948	2122	3267	2965	3230	3739	3685	3417	4412	3924	2146	5213	6062	5452	4226	3681	3987	4789	5652	6137	4499	4033	4299	7904	7355	7376	3940	3735	4119	Predicted protein
Phatr3_EG01781	1573	1479	1784	1488	1504	1278	1754	1438	1338	2171	1937	1113	3429	3646	3485	2730	2632	2421	3609	3904	3462	3756	3091	2942	4112	3562	3647	2908	3269	2951	NA
Phatr3_J8770	550	490	161	517	364	471	759	776	626	876	776	398	398	521	504	405	406	445	235	321	249	196	199	184	525	321	386	237	165	200	Predicted protein
Phatr3_J54066	472	405	285	405	389	400	520	598	460	640	600	288	344	368	345	315	267	294	326	321	352	260	253	269	393	287	365	220	282	242	Predicted protein	SYBE
Phatr3_J43266	270	277	185	328	281	327	672	669	494	732	681	307	349	508	491	479	418	478	789	680	678	739	739	637	760	518	622	526	638	559	Predicted protein
Phatr3_J32441	316	261	53	228	217	286	281	279	332	287	277	136	275	223	176	188	167	196	209	233	213	216	233	216	233	186	175	176	211	199	Predicted protein
Phatr3_J43267	238	175	72	233	158	196	206	200	215	298	268	72	160	200	171	184	141	185	183	202	186	228	214	203	217	216	182	214	205	172	Predicted protein
Phatr3_J32443	0	0	0	0	0	0	0	0	0	0	0	0	0	0	0	0	0	0	0	0	0	0	0	0	0	0	0	0	0	0	Predicted protein
Phatr3_EG02440	1	2	0	2	0	0	3	4	4	2	3	3	2	0	2	6	0	0	3	5	0	1	0	1	2	3	2	4	4	1	Predicted protein
Phatr3_EG02438	940	883	103	784	630	718	827	957	809	857	916	388	171	128	133	118	117	99	494	294	468	208	242	248	283	246	250	140	153	123	Predicted protein
Phatr3_EG02443	50	44	0	17	17	50	40	41	52	65	46	24	11	10	6	9	9	4	39	37	28	20	26	22	31	29	28	17	22	6	NA
Phatr3_EG02442	433	379	291	325	329	359	284	213	237	230	210	121	332	339	306	262	257	211	351	315	303	375	329	351	346	352	287	318	294	276	Predicted protein
Phatr3_EG01785	47	48	8	50	43	56	43	46	65	57	48	24	34	33	31	29	26	26	42	29	28	44	29	45	26	22	24	25	39	22	NA
Phatr3_EG02444	605	654	269	576	497	464	187	167	183	227	229	143	1232	1563	1563	1024	1080	1038	1778	2250	2123	1447	1195	975	4245	3309	2807	1098	1413	1361	Predicted protein
Phatr3_J43271	203	210	126	377	218	281	258	227	191	223	232	63	33	29	29	5	7	13	59	91	68	6	1	6	327	286	235	8	7	4	Predicted protein
Phatr3_J8741	1065	987	172	816	958	903	928	952	1089	1113	974	554	1053	1221	987	1218	1176	1118	1064	1077	1051	1443	1239	1404	1195	1133	1158	1330	1084	1192	Predicted protein
Phatr3_J43274	762	599	472	730	640	664	926	959	783	1081	990	564	843	942	888	902	846	920	1641	1467	1306	1725	1519	1336	997	925	890	1234	1320	1296	Predicted protein
Phatr3_J6093	0	0	0	0	0	0	0	0	0	0	0	0	0	0	0	0	0	0	0	0	0	0	0	0	0	0	0	0	0	0	Predicted protein
Phatr3_J54067	1481	1345	717	1217	1100	1034	2865	2968	2133	2634	2410	1148	1513	2047	2035	1411	1584	1531	1234	1376	1183	914	1006	814	1909	1270	1491	774	919	829	Histone-like transcription factor
Phatr3_J32453	40	27	47	31	21	35	19	23	16	33	31	8	22	10	12	19	7	19	16	11	12	18	25	15	13	12	10	24	21	10	Predicted protein
Phatr3_EG02445	21	30	25	21	20	29	12	25	19	30	29	10	13	19	16	16	16	13	52	51	36	44	37	30	64	41	35	24	35	37	Predicted protein
Phatr3_J32455	3	3	0	6	2	0	3	1	0	4	3	0	2	1	5	6	8	0	0	1	1	8	3	7	0	1	3	4	2	1	Gag-pol polyprotein
Phatr3_EG01790	4	1	0	11	3	5	0	1	0	4	0	4	0	0	1	6	2	3	0	0	4	6	4	4	1	0	0	1	5	1	NA
Phatr3_J54068	283	354	113	275	242	295	599	698	665	676	641	293	393	500	529	369	430	481	348	442	402	379	350	327	670	414	474	291	302	330	N-acetylglucosaminyl-phosphatidylinositol biosynthetic protein
Phatr3_J25127	448	432	755	455	466	467	233	188	152	289	234	108	612	573	504	569	432	401	568	749	804	760	666	828	555	815	848	636	579	768	Nucleoside diphosphate kinase	NDK3
Phatr3_J43277	0	0	0	0	0	0	0	0	0	0	0	0	0	0	0	0	0	0	0	0	0	0	0	0	0	0	0	0	0	0	Probable chorismate mutase
Phatr3_EG01756	4	16	0	4	16	5	3	0	2	4	3	1	9	4	2	4	4	4	5	4	6	5	0	8	1	2	3	12	6	4	NA
Phatr3_J43278	153	125	47	108	130	116	96	68	64	92	57	33	78	54	39	63	56	64	114	145	157	189	152	162	116	108	123	95	111	94	Predicted protein
Phatr3_J32459	2	0	0	2	0	3	1	2	0	2	2	1	0	0	0	0	2	2	0	0	0	1	4	0	0	0	0	0	2	0	Predicted protein
Phatr3_J36269	3	8	0	4	4	1	4	0	1	2	0	2	2	0	0	0	4	0	2	3	0	1	1	2	4	2	2	6	2	3	Predicted protein
Phatr3_J36270	435	365	166	336	272	326	244	269	245	311	307	152	355	392	313	360	341	353	386	378	347	538	403	391	553	277	275	422	427	378	NA
Phatr3_J46336	3473	2947	2109	2062	2900	2694	339	276	333	456	356	238	22010	23708	19805	20205	19343	17230	11421	13327	14768	19053	15249	16218	17116	21570	18122	15949	19556	21297	Predicted protein
Phatr3_J54560	10	32	28	20	24	12	0	0	0	1	0	0	11	8	4	11	2	12	9	7	9	23	17	13	21	13	16	18	16	23	Predicted protein
Phatr3_J13005	1857	1673	1317	1580	1613	1387	990	958	864	1120	1097	565	2080	2091	2151	2106	1824	1802	1645	1780	1637	1906	1719	1642	1685	1536	1480	1688	1830	1882	Glutathione peroxidase
Phatr3_J46339	138	130	67	155	81	125	114	164	122	153	157	80	79	78	88	59	52	72	77	89	74	50	56	71	117	103	82	74	67	57	Predicted protein
Phatr3_J231	1776	1339	548	1261	1104	1307	863	792	717	1062	928	458	922	1041	886	1023	1031	1061	1386	1139	1159	1731	1666	1510	981	770	738	1454	1507	1210	Predicted protein
Phatr3_J36276	35	39	37	30	25	25	27	14	18	48	42	23	23	18	27	33	17	10	47	41	63	55	46	43	96	36	35	42	35	26	Predicted protein
Phatr3_J46341	456	343	216	339	295	351	236	263	203	371	337	182	196	309	276	274	275	295	562	449	440	544	532	439	486	335	352	461	439	417	Predicted protein
Phatr3_EG00730	0	0	0	0	0	0	0	0	0	0	0	0	0	0	0	0	0	0	0	0	0	0	0	0	0	0	0	0	0	0	NA
Phatr3_J46342	139	124	25	90	75	128	112	112	128	136	122	50	146	239	116	135	84	137	279	300	271	323	231	281	317	237	302	244	205	266	Predicted protein
Phatr3_J46343	631	635	654	584	506	588	775	733	594	778	695	262	4	4	6	25	20	28	5	15	9	22	33	30	79	38	81	14	5	13	Predicted protein
Phatr3_EG00717	81	88	0	125	103	187	48	80	71	181	183	107	47	41	49	74	86	105	59	63	68	177	158	150	89	30	42	164	158	145	NA
Phatr3_J46344	249	207	216	216	248	234	297	303	229	354	316	154	208	231	199	175	193	165	212	242	228	239	243	192	260	233	221	196	180	207	Predicted protein
Phatr3_J46345	13	10	0	7	10	15	5	12	3	9	12	6	7	7	10	9	12	4	19	12	15	15	20	13	26	13	15	12	21	8	Predicted protein
Phatr3_J46346	11	4	8	11	20	10	1	5	6	2	15	5	0	8	10	8	14	13	10	11	8	27	16	17	8	3	13	13	13	12	Predicted protein
Phatr3_J46347	636	594	234	518	561	620	395	344	461	452	386	211	333	371	257	411	372	327	155	102	101	198	193	270	47	75	52	205	168	192	Predicted protein
Phatr3_J36284	917	692	313	539	524	586	141	84	103	126	116	64	368	338	240	278	220	193	622	443	507	583	558	539	456	411	428	481	500	530	Predicted protein
Phatr3_J46348	62	48	43	64	41	43	36	43	40	47	54	39	54	62	69	75	62	94	178	180	123	246	209	196	159	87	105	158	194	192	Predicted protein
Phatr3_J50961	1052	951	187	1303	905	1251	367	329	359	539	503	211	85	88	94	105	102	99	140	136	101	267	186	134	207	108	118	170	251	214	Predicted protein
Phatr3_EG00752	6	4	0	1	2	2	1	1	0	0	5	9	0	0	0	7	6	0	6	2	4	7	10	3	4	4	1	4	7	4	NA
Phatr3_EG00762	0	0	0	0	0	0	0	2	0	0	0	0	0	0	0	0	0	0	0	0	0	0	0	0	0	0	0	0	0	0	NA
Phatr3_J36287	3	0	0	1	0	0	1	0	0	1	0	0	2	0	0	0	0	0	0	0	0	2	1	0	0	0	0	0	0	0	Predicted protein
Phatr3_EG00761	309	247	36	284	224	307	90	71	60	93	93	39	7	10	6	29	16	18	4	0	6	13	10	17	4	1	5	12	22	7	NA
Phatr3_J20740	232	227	87	150	195	160	246	237	185	314	243	124	261	394	285	423	409	406	1189	1021	957	1518	1355	1084	639	546	519	1071	1030	933	Predicted protein
Phatr3_J36289	0	1	0	5	1	2	0	1	0	0	1	0	0	2	0	3	0	0	2	1	0	2	3	3	1	1	0	2	3	0	Predicted protein
Phatr3_J46351	173	162	27	169	154	166	120	119	126	186	182	63	117	85	85	67	43	58	235	253	254	84	75	97	365	229	245	68	89	71	Predicted protein
Phatr3_EG02290	132	117	10	72	111	87	65	51	57	71	75	37	119	144	102	136	139	179	369	313	386	543	486	534	211	169	210	469	369	374	Predicted protein
Phatr3_EG00748	0	0	0	0	0	0	0	0	0	0	0	0	0	0	0	0	0	0	0	0	0	0	0	0	0	0	0	0	0	0	NA
Phatr3_EG00741	3	1	0	0	0	0	1	0	0	0	0	0	1	0	0	2	0	0	0	0	0	0	1	1	7	0	3	0	0	0	NA
Phatr3_J46353	130	86	65	160	152	128	122	90	78	137	141	56	114	93	90	79	89	79	121	119	135	91	118	99	183	170	166	122	87	119	Predicted protein
Phatr3_EG00766	59	67	19	66	60	86	29	21	25	39	28	29	24	26	34	36	24	29	21	23	29	35	43	53	23	18	22	51	26	44	NA
Phatr3_EG00780	2	1	0	0	1	0	2	2	0	1	0	0	0	2	7	0	2	1	3	1	4	0	2	1	6	0	0	0	1	0	NA
Phatr3_J36293	0	0	0	0	0	0	0	0	0	0	0	0	0	0	0	0	0	0	0	0	0	0	0	0	0	0	0	0	0	0	Predicted protein
Phatr3_J1813	311	246	92	264	235	260	159	169	139	247	220	110	154	199	194	160	197	190	215	242	210	314	266	254	309	191	211	258	244	215	Predicted protein
Phatr3_J13053	312	317	81	205	206	225	224	234	173	296	248	129	226	233	227	273	215	298	272	232	263	310	289	315	306	224	232	250	228	230	NA
Phatr3_EG00732	0	0	0	0	0	0	0	0	0	0	0	0	0	0	0	0	0	0	0	0	0	0	0	0	0	0	0	0	0	0	NA
Phatr3_J46356	944	727	513	762	630	761	817	719	628	900	878	391	454	453	384	451	340	297	420	322	339	293	306	295	496	390	434	266	278	222	NA
Phatr3_J27877	25925	24741	23841	28716	26025	28198	7855	6719	7483	10802	9756	5573	9455	9002	8334	9652	7913	8323	7610	6203	6818	8905	8741	8161	8178	8951	8065	7392	8022	7844	Predicted protein
Phatr3_EG00723	0	0	0	5	2	4	0	0	0	0	5	3	0	0	0	0	0	0	5	0	0	0	0	0	2	1	0	0	1	0	NA
Phatr3_J20755	611	611	377	1082	624	840	81	55	60	81	77	25	39	20	20	5	5	10	14	5	8	2	5	9	6	2	14	5	8	3	Predicted protein
Phatr3_J46359	488	553	149	808	691	958	234	279	302	394	305	159	408	352	278	352	309	320	146	185	259	205	183	263	199	182	239	234	185	225	Predicted protein
Phatr3_J46360	392	368	252	376	389	375	97	52	91	142	156	90	292	291	277	248	205	284	321	297	277	354	425	364	110	107	121	298	269	256	Predicted protein
Phatr3_J36301	293	272	235	333	277	281	257	311	203	321	307	122	245	199	203	180	148	166	314	256	259	234	317	236	187	151	141	228	213	194	Predicted protein
Phatr3_J46361	420	392	240	484	373	387	429	424	433	412	403	213	135	97	81	200	137	179	2	2	0	5	6	14	0	5	0	11	16	13	Predicted protein
Phatr3_J20757	1996	1721	2120	1846	1505	1736	29	14	36	162	157	102	389	368	359	1197	1036	1323	1	5	2	114	77	79	0	1	1	116	91	110	Uroporphyrinogen decarboxylase	HEME_1
Phatr3_J46363	496	458	481	462	388	384	215	221	197	307	313	151	447	433	441	512	484	506	428	363	403	666	557	482	235	167	152	484	491	470	Predicted protein
Phatr3_J46364	1899	1649	1495	1539	1496	1387	1996	1793	1556	2206	2043	1029	1213	1275	1285	1247	1161	988	818	741	741	763	795	739	458	557	482	628	712	662	Predicted protein
Phatr3_EG02285	437	379	253	530	415	491	317	293	289	349	291	136	395	342	283	237	193	174	122	91	113	124	121	149	168	262	188	128	175	160	Predicted protein
Phatr3_EG00771	0	0	0	0	0	0	0	0	0	0	0	0	0	0	0	0	0	0	0	0	0	0	0	0	0	0	0	0	0	0	NA
Phatr3_EG00778	224	201	243	164	223	156	238	225	172	360	310	190	331	371	423	446	408	409	827	757	777	981	878	850	301	330	338	614	750	599	NA
Phatr3_J36309	258	306	191	114	287	199	279	290	299	603	570	301	773	965	911	1124	1215	1432	1777	1823	1562	2075	2202	1605	968	551	711	1721	2070	1869	Predicted protein
Phatr3_EG00756	0	0	0	0	0	0	0	0	0	0	0	0	0	0	0	0	0	0	0	0	0	0	0	0	0	0	0	0	0	0	NA
Phatr3_J36310	11	13	0	14	8	14	7	7	6	13	5	2	7	12	6	5	6	14	16	14	24	13	10	5	29	15	61	8	5	13	Predicted protein
Phatr3_EG02289	739	727	596	457	366	456	214	218	235	159	162	76	214	206	182	142	110	86	202	132	175	161	132	145	104	109	121	112	100	114	Predicted protein
Phatr3_J46370	329	368	54	241	254	219	36	19	22	26	15	13	10	27	26	10	4	2	143	128	124	11	8	5	175	162	184	11	8	0	Predicted protein
Phatr3_J46371	94	85	40	79	76	92	132	153	171	199	163	102	217	249	277	298	292	342	402	401	335	497	407	367	319	244	300	399	386	412	Predicted protein
Phatr3_J46372	386	333	249	305	281	370	216	198	228	256	291	130	338	340	290	303	323	249	294	243	269	345	354	338	230	231	241	272	296	297	Absent, small, or homeotic discs 2
Phatr3_EG00773	32	26	0	17	18	17	13	9	8	19	6	5	23	16	5	12	18	10	15	15	16	10	12	12	17	11	4	9	19	12	NA
Phatr3_J46373	55	63	45	49	76	50	21	20	25	37	32	11	47	32	9	20	17	14	43	25	41	37	34	37	25	17	22	26	18	13	Predicted protein
Phatr3_J6732	455	398	212	342	345	303	459	449	371	566	488	222	712	871	800	702	806	727	239	271	271	448	433	455	233	247	234	501	479	435	Predicted protein
Phatr3_J46375	288	285	308	271	368	274	606	690	582	850	881	465	254	398	412	483	516	627	177	181	208	369	367	313	40	35	32	341	303	297	Predicted protein
Phatr3_J46376	364	387	95	274	346	317	309	314	259	355	301	165	332	289	305	326	288	363	220	243	252	337	323	273	283	270	191	326	320	297	Predicted protein
Phatr3_J46377	135	147	62	256	210	307	258	214	296	434	378	263	1	11	3	15	12	5	1	1	2	5	4	2	0	1	0	0	6	4	Predicted protein
Phatr3_J46378	82	77	16	98	55	74	72	50	74	97	84	58	20	21	18	31	31	27	51	50	32	29	23	9	111	59	51	28	17	23	Predicted protein
Phatr3_J36322	1735	1430	838	1542	1435	1393	1493	1369	1431	1751	1743	811	2159	2135	2124	1891	1976	1966	2687	2685	2463	2710	2363	2250	3031	2221	2475	2415	2514	2452	Predicted protein
Phatr3_J36323	2	1	0	2	2	0	46	53	29	24	30	10	0	2	1	1	1	0	1	0	2	3	3	3	2	1	1	0	1	2	Predicted protein
Phatr3_J13004	93	88	24	73	60	65	142	108	97	116	115	41	59	41	52	43	44	36	26	31	52	45	43	51	25	22	42	29	32	38	NA
Phatr3_J46380	442	346	185	223	318	241	135	115	113	168	123	92	233	225	190	146	126	154	399	273	271	315	403	274	284	189	202	277	283	320	Predicted protein
Phatr3_J46381	2271	1943	2038	1843	1866	1825	1569	1486	1161	1884	1769	1066	1878	1783	1741	2217	1842	1768	1685	1815	1855	2192	2216	1957	1197	1167	1068	1804	2007	2145	Predicted protein
Phatr3_J46382	998	864	356	698	627	821	402	330	352	562	426	225	629	578	500	622	538	621	903	842	935	1117	996	1224	692	704	730	961	940	965	Predicted protein
Phatr3_J46383	282	269	94	213	251	290	279	274	210	315	286	157	325	266	280	219	192	299	285	238	260	244	209	254	327	303	275	202	228	230	Predicted protein
Phatr3_EG02292	442	441	326	626	299	487	855	812	669	1029	966	468	309	370	351	404	460	415	381	308	288	364	304	255	410	252	259	245	285	224	Glycine decarboxylase t-protein	GDCT_1
Phatr3_J50964	1465	1256	675	1395	1136	1359	308	241	355	401	427	249	125	73	70	97	60	58	76	39	49	44	45	41	51	49	21	33	35	23	O-acetylhomoserine
Phatr3_J46387	292	326	142	332	259	292	297	243	222	306	319	125	250	386	325	269	257	317	510	539	426	451	386	344	607	409	484	360	419	367	Predicted protein
Phatr3_EG00727	18	42	9	48	18	26	15	13	22	25	24	11	26	20	15	14	12	16	41	24	15	43	36	28	23	8	11	22	28	14	NA
Phatr3_EG00738	7	8	0	7	8	6	5	0	2	1	2	2	4	2	1	0	1	1	0	2	5	9	6	7	4	1	1	0	4	7	NA
Phatr3_J27889	146	126	29	204	182	175	112	60	98	152	123	73	35	19	25	18	3	19	4	0	2	2	2	9	8	6	3	8	5	5	Predicted protein
Phatr3_J46389	1610	1630	598	1677	1416	1733	1837	1902	1930	2049	1962	1160	1147	1294	1252	1295	1236	1179	943	901	896	1122	1098	998	728	718	614	937	883	941	NA
Phatr3_EG00722	192	160	0	118	102	146	129	146	85	129	100	67	95	87	61	102	100	85	101	84	107	162	137	126	163	98	88	120	121	127	NA
Phatr3_J46390	384	400	234	339	289	289	356	347	294	434	396	201	281	374	308	272	263	308	498	429	420	505	448	395	489	312	388	326	382	357	Predicted protein
Phatr3_J13205	690	621	105	579	412	507	874	910	700	1017	888	407	532	587	439	529	504	558	632	570	487	634	605	536	618	487	467	549	532	467	Predicted protein
Phatr3_J46392	0	0	0	0	0	0	0	0	0	0	0	0	0	0	0	0	0	0	0	0	0	0	0	0	0	0	0	0	0	0	Predicted protein
Phatr3_EG00733	5	2	0	0	1	2	1	2	1	1	0	0	3	2	6	2	2	2	14	4	6	6	5	7	11	7	4	5	2	4	NA
Phatr3_J36337	338	238	65	184	191	206	88	74	78	94	80	36	185	216	148	154	148	147	447	289	353	390	346	338	392	327	365	300	339	314	Predicted protein
Phatr3_EG00768	0	0	0	0	0	0	0	0	0	0	0	0	0	0	0	0	0	0	0	0	0	0	0	0	0	0	0	0	0	0	NA
Phatr3_J54569	16	11	11	31	6	14	318	314	198	166	171	82	128	185	178	190	165	147	232	187	161	272	286	205	114	75	88	188	177	223	Predicted protein
Phatr3_J13158	203	219	67	165	139	167	158	178	168	177	198	79	156	162	155	144	161	157	286	247	249	288	296	261	187	129	162	211	253	247	Predicted protein
Phatr3_J46394	503	419	254	395	422	523	426	368	526	740	677	366	485	481	488	725	653	782	826	654	786	1329	1243	1120	245	217	239	1064	1148	982	Predicted protein
Phatr3_J46395	4730	4665	5606	3804	3926	3786	585	516	717	1231	1129	792	2627	2496	2097	5099	4617	4892	829	736	771	4374	3653	3909	159	197	184	3607	3761	3966	Predicted protein
Phatr3_J1859	535	518	250	548	457	572	539	548	412	657	620	262	383	477	429	339	359	345	541	465	582	578	461	464	611	477	459	493	485	403	Predicted protein
Phatr3_J20773	970	906	602	666	904	815	797	732	780	1014	1029	644	1608	1697	1576	1786	1756	1838	2940	2797	2921	3994	3843	3620	1660	1643	1781	3115	3154	3162	Predicted protein
Phatr3_J46398	519	497	312	596	514	500	599	679	593	800	684	362	553	630	551	675	551	670	379	369	409	522	469	414	472	416	381	512	505	409	Predicted protein
Phatr3_J46399	1167	1053	732	992	1029	864	853	832	726	897	966	470	1205	1360	1338	1338	1186	1255	1445	1531	1593	1877	1846	1558	1405	1219	1273	1509	1705	1617	Predicted protein
Phatr3_J46400	536	453	217	497	504	518	822	838	643	949	842	358	896	961	831	772	728	756	674	640	639	626	549	663	704	609	612	619	585	616	Predicted protein
Phatr3_J36347	815	774	14	531	514	827	193	163	202	344	339	201	327	293	240	674	712	955	4	2	7	68	72	123	1	0	5	102	60	69	Predicted protein
Phatr3_EG00728	0	0	0	0	0	0	0	0	0	0	0	0	0	0	0	0	0	0	0	0	0	0	0	0	0	0	0	0	0	0	NA
Phatr3_J46402	462	350	219	404	365	424	261	278	172	364	322	151	400	486	508	386	445	395	416	338	331	478	417	388	352	351	365	387	369	356	Predicted protein
Phatr3_J46403	169	170	146	262	132	174	5	16	11	7	8	2	1	5	3	1	0	0	3	3	0	5	0	2	6	6	10	1	2	3	Predicted protein
Phatr3_J20779	474	430	851	509	381	400	78	58	58	75	75	61	40	20	31	31	14	35	12	1	15	18	20	11	10	3	1	15	5	17	Aldolase fructose-6-phosphate-aldolase	FSA
Phatr3_J46405	561	449	89	430	452	517	386	328	271	479	370	198	400	432	446	537	446	502	445	368	392	568	505	569	296	259	290	530	521	440	Predicted protein
Phatr3_EG00763	0	0	0	0	0	0	0	0	0	0	0	0	0	0	0	0	0	0	0	0	0	0	0	0	0	0	0	0	0	0	NA
Phatr3_J46406	1130	1106	501	1172	925	1118	1323	1400	1263	1701	1585	746	1102	1479	1371	1607	1611	1498	1378	1397	1341	1697	1509	1534	1641	1305	1310	1557	1390	1413	Predicted protein
Phatr3_J27905	207	207	59	116	216	176	590	579	448	742	693	347	643	799	621	793	832	916	1587	1446	1506	2294	1961	1569	1061	875	939	1571	1613	1619	Predicted protein
Phatr3_J46408	210	201	16	200	144	190	229	194	163	246	231	90	45	37	36	55	46	57	85	52	45	70	75	50	30	45	39	48	52	34	tRNA pseudouridine synthase
Phatr3_J46409	168	176	14	159	154	170	145	141	170	174	182	78	172	167	130	143	135	144	140	222	192	142	158	185	282	175	213	155	162	127	Predicted protein
Phatr3_EG00757	0	0	0	0	0	0	0	0	0	0	0	0	0	0	0	0	0	0	0	0	0	0	0	0	0	0	0	0	0	0	NA
Phatr3_EG00735	13	23	25	30	13	16	18	16	15	22	16	8	23	24	19	21	25	5	37	27	29	25	12	9	10	32	13	22	14	19	NA
Phatr3_EG00765	51	20	17	39	31	23	13	9	6	18	15	2	12	13	19	4	4	8	24	14	7	24	14	17	24	15	21	18	14	23	NA
Phatr3_J36356	427	414	288	532	486	510	181	161	170	262	282	125	20	31	47	76	90	78	14	18	12	9	10	13	19	13	6	11	9	18	Predicted protein
Phatr3_EG00725	0	0	0	0	0	0	0	0	0	0	0	0	0	0	0	0	0	0	0	0	0	0	0	0	0	0	0	0	0	0	NA
Phatr3_J46411	929	879	1289	862	768	910	988	808	777	1403	1285	621	143	124	93	684	501	782	35	56	23	40	19	34	101	74	52	25	25	26	Predicted protein	ALBINO3
Phatr3_EG00777	89	113	71	171	89	106	29	17	30	34	28	9	32	17	25	20	18	15	34	45	30	40	31	19	62	38	63	10	28	26	NA
Phatr3_EG00726	113	160	38	116	161	106	96	79	82	103	103	44	126	113	100	106	90	104	211	233	166	204	152	192	236	171	174	156	181	123	NA
Phatr3_J36358	83	80	26	96	89	81	33	40	22	24	24	23	86	92	89	102	67	82	238	237	224	143	156	104	311	231	222	115	177	147	Predicted protein
Phatr3_EG00746	6	11	0	3	6	4	3	0	0	1	2	2	5	0	1	7	5	4	7	4	3	4	4	8	23	8	10	7	9	9	NA
EPrPhatr3G00000013170	0	4	0	0	4	1	5	3	1	7	9	3	5	6	6	7	0	6	0	10	2	5	5	1	0	0	0	3	3	6	NA
Phatr3_J36359	317	312	122	311	319	317	513	487	427	479	439	254	462	539	459	397	388	418	556	597	568	492	475	413	833	631	601	456	459	464	Predicted protein
Phatr3_J54574	51	73	20	42	41	34	13	18	20	22	14	18	6	36	16	13	12	8	64	64	54	25	48	26	42	32	37	25	27	28	Predicted protein
Phatr3_J46415	421	393	174	359	364	349	210	257	198	352	277	165	556	610	591	528	522	590	533	599	557	671	656	590	651	495	427	581	569	598	Predicted protein
Phatr3_J36362	1549	1369	1908	1309	1136	1093	545	547	596	877	930	486	1057	1164	975	1399	1394	1472	200	200	204	576	626	576	142	135	129	551	535	519	Peptidyl-prolyl cis-trans isomerase
Phatr3_EG00750	5	0	0	1	0	1	2	4	1	1	5	2	4	0	0	8	1	0	1	1	2	3	2	4	0	1	1	1	0	7	NA
Phatr3_J20787	1092	846	0	689	734	1040	842	934	1042	911	887	495	1013	1161	901	983	913	1179	806	903	1136	1178	983	1495	800	1059	1106	1127	845	1092	Predicted protein
Phatr3_J46417	450	437	117	562	425	454	391	405	345	551	527	210	272	313	224	220	183	216	199	146	143	172	173	193	145	148	125	147	134	146	Predicted protein
Phatr3_J46418	1554	1428	599	1558	1067	1436	5144	5537	4849	4832	4334	2345	1985	3480	3199	2038	2445	2821	301	580	387	111	97	107	1610	1033	1091	171	137	127	Predicted protein
Phatr3_J46419	288	314	24	233	223	264	607	706	578	632	637	323	332	571	598	399	473	424	245	289	260	157	140	163	532	356	395	142	201	151	Predicted protein
Phatr3_J46420	678	721	623	658	537	616	501	517	434	559	538	267	314	324	342	195	220	250	721	598	566	479	597	468	724	374	381	305	260	284	Predicted protein
Phatr3_EG02286	1627	1624	1214	885	793	767	29	33	46	93	121	101	7	38	16	23	10	32	981	899	817	1323	1441	1016	172	57	115	383	385	326	Predicted protein
Phatr3_EG00755	0	0	0	0	0	0	0	0	0	0	0	0	0	0	0	0	0	0	0	0	0	0	0	0	0	0	0	0	0	0	NA
Phatr3_EG01997	352	261	159	316	217	305	41	38	72	70	55	37	91	89	82	66	50	39	85	53	72	54	73	56	84	78	72	38	42	28	Helicase_2
Phatr3_EG01999	184	144	0	113	91	151	35	33	31	46	35	11	54	49	49	52	31	36	71	40	26	33	31	47	71	42	43	29	21	15	NA
Phatr3_J46423	1003	889	331	1321	998	1107	1468	1698	1463	1517	1268	757	639	751	762	480	473	404	207	300	340	146	162	136	799	669	630	154	139	164	Predicted protein
Phatr3_EG00740	203	193	241	257	191	194	232	195	149	234	238	93	114	108	64	101	86	71	95	67	84	91	98	113	37	42	43	71	90	77	NA
Phatr3_EG00737	396	456	388	782	585	610	347	356	347	522	399	256	139	139	120	92	133	118	105	91	71	112	100	87	56	28	39	102	98	85	NA
Phatr3_J1196	13	11	7	24	13	13	16	22	15	27	20	17	14	2	3	18	26	8	17	17	13	28	42	28	9	9	6	24	29	13	NA
Phatr3_J46424	559	352	336	454	341	389	1418	1373	1158	1423	1190	574	525	557	500	438	479	452	321	419	349	366	300	320	446	370	448	335	324	337	Predicted protein
Phatr3_J46425	368	416	157	309	256	283	148	192	171	179	174	104	218	166	126	178	167	192	332	299	308	367	342	302	231	188	229	280	282	314	NA
Phatr3_J27923	2828	2684	838	2476	2504	2989	2034	1855	2150	2127	1847	965	1584	1538	1267	1392	1151	1204	1421	1345	1415	1423	1286	1540	789	1042	1086	1245	1116	1226	Predicted protein
Phatr3_J13076	2329	2173	612	1180	1696	1627	45	35	82	322	380	438	873	936	920	2663	2121	3340	7502	9582	10344	12378	11572	13373	4165	2935	5504	9711	7848	9469	Predicted protein
Phatr3_J46428	390	325	87	338	280	309	984	1144	917	1160	863	390	184	205	186	169	139	144	220	209	170	239	204	185	161	117	149	190	147	138	Predicted protein
Phatr3_J36377	200	227	330	185	212	179	26	19	23	36	42	24	174	124	142	159	137	149	273	287	287	282	252	245	333	250	217	211	287	233	NA
Phatr3_J46429	499	521	120	378	332	365	564	534	433	585	487	267	365	373	351	354	309	292	373	471	483	496	543	435	382	296	311	378	373	418	Predicted protein
Phatr3_J46430	450	391	144	332	354	388	152	130	137	249	217	79	106	66	71	89	113	106	188	126	142	291	221	243	21	23	23	203	217	204	Predicted protein
Phatr3_EG00739	1	0	0	3	1	3	0	0	0	1	0	0	0	0	0	0	0	0	0	0	2	0	3	0	2	0	3	0	3	0	NA
Phatr3_J46431	61	46	8	72	40	51	15	8	37	9	17	16	19	5	7	6	9	7	92	56	53	75	34	23	124	61	71	21	26	35	Predicted protein
Phatr3_J36381	277	241	81	208	222	169	121	101	127	149	136	82	54	74	48	117	76	98	87	72	67	193	128	173	98	75	54	138	135	177	NA
Phatr3_J13088	1041	979	188	768	969	1012	767	702	652	1092	927	485	968	1003	860	1210	1030	1182	1312	1190	1430	1736	1525	1722	954	1030	1033	1346	1265	1421	Predicted protein
Phatr3_J36383	214	230	175	147	141	123	217	168	181	261	220	129	238	272	259	317	379	410	572	517	454	766	829	558	241	230	215	533	611	558	Predicted protein
Phatr3_J46433	28918	26664	43277	28319	24973	24712	6335	4403	5220	9317	8611	5482	534	301	291	5611	4723	4110	22	21	7	479	518	587	10	6	21	445	511	450	Predicted protein
Phatr3_J46434	969	889	248	879	767	844	1030	1091	985	1209	1158	554	753	981	804	858	982	909	1127	1127	1141	1200	1104	1071	1429	1095	1156	1126	1006	1001	NA
Phatr3_J36386	266	203	114	235	200	171	149	125	120	205	137	81	154	186	159	151	139	133	183	258	251	167	220	230	209	250	223	197	157	192	Predicted protein
Phatr3_EG00758	0	0	0	0	0	0	0	0	0	0	0	0	0	0	0	0	0	0	0	0	0	0	0	0	0	0	0	0	0	0	NA
Phatr3_J46435	115	94	55	69	87	61	55	46	35	70	47	22	58	74	82	76	87	69	97	111	91	123	129	134	82	48	51	101	134	113	Predicted protein
Phatr3_J46436	1746	1532	810	1282	1275	1442	1020	1060	1230	1335	1177	608	1888	2280	1864	2004	1940	2181	2181	2434	2377	3075	2767	3008	1920	1734	2009	2486	2304	2603	NA
Phatr3_J20809	1041	945	887	842	836	818	794	721	722	1086	975	589	1084	1238	1186	1691	1569	1658	414	246	292	837	851	881	103	105	105	833	899	863	3-dehydroquinate synthase	AROB
Phatr3_J36390	91	115	10	83	87	109	102	87	79	76	77	59	51	96	100	95	58	100	58	33	38	84	130	116	25	15	16	96	76	88	Predicted protein
Phatr3_J46438	902	702	590	702	747	769	453	461	422	554	495	293	589	545	464	629	484	562	697	689	674	953	906	773	522	393	470	683	785	751	Predicted protein
Phatr3_EG02291	490	380	247	366	323	365	162	91	95	195	142	97	196	130	142	153	112	116	156	90	142	118	112	171	77	107	97	111	122	101	Predicted protein
Phatr3_J36394	732	579	675	548	430	447	101	112	129	135	152	92	245	229	148	225	165	132	319	286	354	421	360	427	221	196	216	302	321	403	Predicted protein
Phatr3_J46440	615	548	127	468	480	523	342	295	291	443	434	199	335	304	293	342	324	293	608	521	552	648	600	583	407	437	396	583	554	573	Predicted protein
Phatr3_J13096	838	686	283	702	682	680	267	233	238	354	309	159	546	545	514	480	380	331	618	553	623	542	470	484	536	531	495	416	429	498	Predicted protein
Phatr3_J36397	430	440	133	422	324	368	264	276	303	340	326	121	346	314	305	337	308	357	432	434	470	478	514	446	442	346	346	428	431	404	NA
Phatr3_J36398	245	175	119	215	196	166	141	123	170	146	117	73	192	161	163	193	118	140	125	144	138	190	165	214	87	66	73	176	180	153	Predicted protein
Phatr3_J13001	6612	6204	4146	7237	4547	6103	8866	7542	7785	11669	10426	5346	1525	1104	1057	2374	2131	2671	32	7	32	177	188	368	6	8	9	250	214	202	Predicted protein
Phatr3_J46444	2742	3051	743	2940	2503	2710	3704	3428	3337	4364	4035	2020	486	274	329	429	413	507	95	60	68	133	220	289	47	79	43	172	173	187	Electron carrier protein
Phatr3_J46445	76	92	37	73	81	80	341	283	226	189	181	66	16	9	11	4	19	13	2	5	0	3	3	5	11	2	0	2	4	1	Predicted protein
PTsRNA00006a	3	1	0	2	0	2	4	1	4	2	0	3	5	4	0	0	2	0	0	0	1	5	0	2	2	1	1	0	2	0	NA
Phatr3_J36402	142	150	5	129	93	121	164	172	157	186	164	116	154	130	130	129	68	118	140	118	113	148	113	92	139	80	94	143	129	110	NA
Phatr3_J36403	366	403	138	272	254	298	206	169	144	199	178	121	257	208	150	239	181	196	247	277	290	328	298	331	157	159	169	240	254	265	Predicted protein
Phatr3_J46446	307	277	83	227	207	225	320	376	362	353	314	149	155	159	154	174	178	192	213	193	191	246	213	225	178	139	153	220	167	175	Predicted protein
Phatr3_EG00753	0	0	0	0	0	0	0	0	0	0	0	0	0	0	0	0	0	0	0	0	0	0	0	2	0	0	0	0	0	0	NA
Phatr3_J36405	0	0	0	0	0	0	0	0	0	0	0	0	0	0	0	0	0	0	0	0	0	0	0	0	0	0	0	0	0	0	NA
Phatr3_J46447	144	111	103	141	86	139	304	356	177	286	307	122	58	62	82	74	56	60	54	44	54	48	58	45	133	40	74	35	35	33	Predicted protein
Phatr3_J46448	598	631	517	1318	793	935	8175	9943	5895	7644	6496	2575	1194	1874	1872	1155	1312	902	945	1997	1612	840	809	672	4424	2008	2374	651	789	693	Predicted protein
Phatr3_EG00731	555	457	150	446	334	488	301	275	249	340	343	153	296	239	228	262	205	224	355	248	281	351	286	368	235	230	199	300	231	250	NA
Phatr3_J50971	1471	1332	572	1652	1346	1577	346	253	312	411	348	240	18	9	8	31	47	18	7	5	7	5	7	17	13	12	12	5	15	13	NA
Phatr3_EG00747	905	698	571	1183	755	965	143	85	161	207	155	88	31	13	13	26	16	23	5	5	8	8	8	15	8	4	1	7	5	15	Predicted protein	TPT5
Phatr3_J46451	262	219	250	272	226	262	137	41	124	134	106	73	123	100	70	80	41	56	102	47	69	29	51	49	58	92	68	47	63	12	Predicted protein
Phatr3_J5808	174	126	103	147	127	135	110	73	69	123	104	53	74	114	86	72	68	75	107	120	109	106	127	85	83	106	119	94	103	73	NA
Phatr3_J46452	386	431	353	392	377	415	269	169	177	356	295	179	431	534	487	517	563	625	735	695	608	937	906	776	435	382	403	770	671	718	Predicted protein
Phatr3_J46453	272	216	132	111	208	163	280	212	208	291	316	151	402	544	568	535	499	577	611	586	586	828	715	574	608	456	390	528	585	651	Predicted protein
Phatr3_J46454	8982	8178	6613	7551	7011	7467	1917	1520	1892	3477	3055	1747	4554	4710	4012	7518	7043	7373	2125	2059	2069	4791	4403	4627	4247	3245	3033	4211	4285	4089	Mucin-associated surface protein	MASP1
Phatr3_J46455	558	639	361	591	599	662	191	220	180	296	228	106	287	253	294	350	310	331	402	479	390	550	482	400	599	403	381	416	458	465	Predicted protein
Phatr3_J46456	227	192	11	155	170	182	0	4	2	3	0	0	42	25	17	24	26	17	78	38	41	66	72	91	59	44	36	63	67	61	Predicted protein
Phatr3_J46457	651	599	296	517	472	581	418	447	425	530	483	290	556	571	559	563	494	609	1124	990	938	1165	958	918	1103	691	737	921	1018	910	Predicted protein
Phatr3_J46458	65	49	22	96	60	97	18	11	14	38	30	13	52	16	31	49	49	52	34	50	32	97	99	103	32	25	25	51	96	62	Predicted protein
Phatr3_J12984	1207	991	326	1079	1001	1045	837	825	770	989	902	387	954	1059	875	962	804	838	1266	1148	1267	1341	1202	1099	1200	1154	1216	1136	1137	1218	Predicted protein
Phatr3_J46460	660	568	349	510	460	463	510	457	476	499	531	260	378	400	408	382	355	338	708	701	723	706	643	687	608	460	440	594	587	639	Predicted protein
Phatr3_J36420	1106	984	1813	1007	1027	986	904	828	963	1163	998	617	1114	1139	1115	1085	978	936	949	1188	951	1313	1226	1011	981	941	841	986	1015	996	Predicted protein
Phatr3_J46461	831	768	494	598	625	676	1028	1114	1062	1228	1102	608	1154	1301	1114	1426	1125	1424	1321	1338	1375	1864	1679	1724	925	880	848	1573	1481	1599	Predicted protein
Phatr3_J27956	569	549	100	472	566	525	658	719	567	721	679	352	822	917	760	844	826	886	1064	1001	853	1052	1015	895	983	743	709	908	843	883	Predicted protein
Phatr3_J36423	176	166	84	165	151	196	34	52	39	47	75	20	27	32	43	35	30	28	52	42	43	53	71	51	21	36	36	29	55	50	Predicted protein
Phatr3_J36424	50	57	51	67	74	58	30	29	22	33	41	27	39	24	30	40	54	33	37	24	23	49	63	38	23	25	10	51	31	34	Predicted protein
Phatr3_J36425	2406	2098	1896	1992	1909	1662	1580	1385	1206	1567	1595	895	2205	2139	2132	2058	2052	1699	1555	1682	1635	1972	1700	1688	1586	1519	1464	1511	1880	1708	Predicted protein
Phatr3_J36426	642	580	75	559	514	612	853	787	770	681	729	367	876	1056	1100	919	844	926	788	837	895	939	1020	1201	965	914	897	948	917	936	Predicted protein
Phatr3_J46464	1089	787	315	761	775	720	1287	1284	1287	1249	1113	612	1043	1280	1144	1142	900	1044	949	1139	1132	1153	964	1072	1075	1110	1111	1059	1019	1045	Predicted protein
Phatr3_J46465	451	392	363	397	577	376	159	183	163	163	156	70	481	546	503	417	481	448	769	953	866	923	1000	798	837	563	725	784	846	849	NA
Phatr3_J20833	1118	999	861	1132	937	1013	434	355	549	517	473	299	383	357	257	408	325	269	123	69	91	95	84	89	96	89	74	60	87	65	Predicted protein
Phatr3_J12981	330	292	82	298	268	282	140	132	100	181	196	71	212	190	159	167	180	126	317	274	294	393	360	315	236	193	230	285	239	237	Predicted protein
PTsRNA00005a	0	0	0	0	0	0	0	0	0	0	0	0	0	0	0	1	0	0	0	0	0	0	0	0	0	0	0	0	0	0	NA
PTsRNA00005b	0	0	0	0	0	0	0	0	0	0	0	0	0	0	0	0	0	0	0	0	0	0	0	0	0	0	0	0	0	0	NA
Phatr3_J46468	911	746	703	927	635	766	124	112	114	191	146	98	395	357	284	220	157	198	209	125	158	122	124	201	77	104	93	137	130	145	NA
Phatr3_J20837	195	189	41	145	143	195	77	91	98	116	132	54	239	202	151	199	174	191	233	249	232	297	251	280	263	241	237	271	195	258	NA
Phatr3_J46470	857	796	474	690	765	851	694	677	609	742	704	386	766	885	827	909	778	815	871	941	971	1193	1060	1172	925	847	901	955	855	960	Predicted protein
Phatr3_J36434	1102	1018	1315	990	941	910	942	858	820	1054	1096	456	1024	1138	1129	930	912	873	857	985	1003	756	847	709	1047	858	897	756	734	678	Predicted protein
Phatr3_J36435	209	182	76	285	210	212	349	369	279	440	425	273	198	219	163	221	305	195	42	69	50	108	84	86	67	41	47	62	79	70	Predicted protein
EPrPhatr3G00000013133	0	0	0	0	0	1	0	0	1	0	0	1	0	0	0	0	0	0	0	0	0	0	0	0	0	0	0	0	1	0	NA
PTsRNA00037a	0	0	0	0	0	0	0	0	0	0	0	0	0	0	0	0	0	0	0	0	0	0	0	0	0	0	0	0	0	0	NA
Phatr3_J54586	979	807	188	673	587	685	571	564	537	710	671	266	494	635	446	664	539	612	778	651	628	958	777	812	733	499	573	790	776	721	Putative uncharacterized protein
Phatr3_J13167	2542	1986	1224	1755	1682	1935	7633	7380	5991	6431	5961	3149	4062	5580	5421	4267	4417	4879	3029	3817	3659	2920	2844	3089	3349	3219	3776	2870	2479	2581	Predicted protein
Phatr3_J46474	204	188	61	194	156	152	180	198	203	276	221	137	301	467	382	223	235	232	787	833	700	357	333	284	1240	901	929	333	309	260	Predicted protein
Phatr3_J46475	761	641	741	655	645	652	627	614	540	837	746	363	868	988	821	893	972	967	856	919	874	981	1034	1035	991	674	774	940	848	949	Predicted protein
Phatr3_J46476	1135	989	623	866	724	813	784	895	777	924	1053	477	592	587	494	558	631	576	839	667	637	924	811	838	719	423	417	787	818	746	NA
Phatr3_EG00769	583	580	303	402	377	473	342	378	381	374	431	198	536	528	460	382	401	404	946	760	794	723	675	670	1266	823	740	561	680	580	NA
Phatr3_J46478	390	386	111	329	288	334	310	283	319	392	445	165	300	296	332	343	329	352	353	387	288	432	380	366	295	198	195	347	358	298	Predicted protein
Phatr3_J36443	3	4	7	6	6	7	3	1	4	2	5	3	4	4	2	3	7	9	5	3	11	13	4	4	3	0	4	4	3	11	Predicted protein
Phatr3_J36444	30	34	4	27	27	19	22	20	41	46	33	33	7	9	43	31	24	19	35	16	27	34	30	15	11	10	13	18	26	17	Predicted protein
Phatr3_J46479	492	427	595	452	369	503	314	317	347	399	414	242	321	409	344	316	338	328	499	512	458	531	483	453	404	324	358	364	455	389	Translation initiation factor eif-2bgamma
Phatr3_J36446	124	112	36	64	99	105	87	90	116	151	120	103	249	288	247	402	383	397	396	459	424	600	489	409	207	204	202	441	505	487	Predicted protein
Phatr3_J13123	292	268	247	207	229	224	194	197	200	306	295	167	444	456	472	465	472	502	1025	1002	870	1104	959	788	779	563	663	856	883	878	Predicted protein
Phatr3_J54588	303	276	30	267	223	240	152	140	145	212	184	115	78	58	51	43	29	44	97	83	86	74	60	59	72	94	72	39	40	41	Predicted protein	GWT1
Phatr3_J36449	212	194	99	234	224	201	216	175	186	215	222	94	301	287	367	223	230	236	135	189	170	147	134	129	207	161	210	139	134	127	Predicted protein
Phatr3_J54589	2045	1845	3444	1997	1850	1646	4694	3768	2416	4100	3609	1930	2944	3523	3726	2700	2696	2118	2076	2538	2466	2422	2418	2031	1767	2147	2162	1570	1853	1799	NA
Phatr3_J46483	173	141	54	110	120	126	182	162	156	165	140	75	141	155	123	95	89	111	133	164	147	131	134	174	188	165	199	159	130	140	NA
Phatr3_J46484	1456	1199	633	1528	1325	1596	1010	1067	887	1202	1136	549	1370	1402	1168	1158	1175	1130	814	700	855	744	745	783	933	960	965	825	736	692	Predicted protein
Phatr3_J46485	447	384	60	311	327	294	276	230	263	353	342	174	356	338	370	381	273	327	582	501	457	546	496	448	500	398	394	476	448	498	Predicted protein
Phatr3_J46486	27	7	9	7	10	14	12	4	7	4	3	0	5	3	5	5	4	4	12	9	3	2	3	13	3	6	3	5	5	11	Predicted protein
Phatr3_J46487	88	122	35	97	107	86	68	84	45	51	60	50	75	105	74	58	59	34	188	221	205	200	172	163	199	129	132	104	120	124	Predicted protein
Phatr3_J46488	36	32	0	27	22	22	9	22	5	25	16	9	16	10	12	9	16	14	5	8	2	7	3	3	24	10	7	7	9	9	Predicted protein
Phatr3_EG00736	30	40	27	50	35	61	42	25	27	21	13	13	19	14	14	11	8	17	17	16	14	21	29	13	29	17	14	10	19	15	NA
Phatr3_J52058	3486	2806	374	2231	2187	2712	1680	1766	1877	1975	1955	1066	1878	1978	1577	1972	1617	1797	3603	3106	3070	4019	3277	3282	3416	2163	2404	3208	3051	3186	Myosin B
Phatr3_J12969	672	582	527	778	587	709	162	117	165	191	169	68	315	291	244	177	162	120	164	85	121	129	102	126	147	158	106	119	126	141	Predicted protein
Phatr3_J46490	583	580	405	540	508	450	557	484	415	623	600	287	689	692	768	663	659	572	930	822	861	960	969	853	832	589	621	790	833	792	Predicted protein
PTsRNA00008a	2	5	0	7	1	1	3	0	1	1	6	2	9	0	3	3	3	8	4	5	6	10	5	5	5	0	1	3	5	6	NA
Phatr3_J46491	385	310	54	256	281	301	221	201	193	283	240	134	468	441	374	403	335	409	448	498	536	638	437	589	527	491	537	489	414	498	Predicted protein
Phatr3_J46492	99	117	102	180	110	183	605	609	520	635	486	214	40	51	79	24	38	38	17	9	9	8	14	14	37	21	23	11	16	6	Predicted protein
Phatr3_J46493	501	515	187	451	490	454	435	349	362	430	424	204	421	385	383	308	248	270	290	279	419	196	188	330	485	383	415	272	243	220	Predicted protein
Phatr3_J54590	507	462	217	412	353	430	720	800	730	749	698	312	468	580	570	443	432	525	263	342	402	316	273	348	459	481	499	262	293	295	Tic22 protein	TIC22
Phatr3_J54591	1995	1700	441	1288	1284	1478	1889	2023	1702	2347	2072	1061	992	1192	1053	1241	1214	1175	1045	750	863	1235	1116	1151	988	645	634	1034	969	1064	Predicted protein	SEC7D
Phatr3_J46496	183	135	50	160	156	132	35	24	39	26	43	20	65	94	99	58	42	52	231	253	217	97	138	66	297	218	242	59	62	66	Predicted protein
Phatr3_J46497	201	176	114	190	167	216	193	277	178	240	205	91	120	207	172	128	177	142	265	280	276	211	229	202	330	249	243	227	170	242	Predicted protein
Phatr3_J13093	1641	1149	511	1047	916	1124	577	492	455	816	788	351	803	798	659	846	877	842	1316	978	1191	1584	1662	1432	918	615	671	1542	1292	1041	NA
Phatr3_EG02533	302	274	57	294	315	318	179	181	209	313	290	130	250	326	248	242	200	249	345	366	319	376	314	343	393	353	400	269	279	250	Predicted protein
Phatr3_J36468	180	178	344	253	186	201	53	61	74	78	66	24	12	3	6	19	21	14	4	7	8	13	4	5	10	3	8	17	9	2	Predicted protein
Phatr3_J46500	285	230	17	196	167	203	98	77	85	82	90	50	8	6	8	33	41	30	4	5	2	9	12	15	3	6	8	4	6	6	Predicted protein
Phatr3_J46501	207	199	107	206	242	253	197	201	185	273	223	170	261	335	237	272	307	310	265	346	313	319	313	295	359	301	283	280	306	318	Predicted protein
Phatr3_J46502	3220	2948	1090	2834	2977	3336	2281	2390	2358	2953	2847	1542	3327	4024	3478	4089	3746	4210	2865	3118	3497	4473	3823	4624	3045	2995	3380	4006	3409	3733	Predicted protein
Phatr3_EG00720	535	551	126	475	453	468	238	262	224	380	366	162	669	702	720	901	893	1000	308	250	279	594	563	643	165	181	210	575	583	545	NA
Phatr3_J5526	1332	1291	621	2159	1591	2059	644	597	615	841	681	361	440	476	547	617	666	779	141	120	108	93	107	127	195	123	113	119	118	103	Predicted protein	HCDK6
Phatr3_J36473	30	33	0	20	33	43	43	20	45	43	33	19	1195	3068	3274	406	670	605	341	616	486	48	45	65	4376	2609	2759	133	155	134	NA
Phatr3_J46504	720	625	235	835	630	785	904	893	830	1018	974	416	670	593	600	483	446	533	295	280	388	200	183	283	478	461	458	210	232	217	Predicted protein
Phatr3_J27972	813	769	812	714	722	710	1056	1135	982	1199	1075	545	739	800	736	711	599	634	466	461	473	541	440	490	349	363	406	432	433	412	Predicted protein
Phatr3_J36476	448	375	207	401	349	369	371	399	316	475	486	218	407	430	390	397	393	400	658	548	486	728	739	606	430	423	384	579	590	554	Predicted protein
Phatr3_J27976	1444	1270	594	1213	1071	1363	1050	966	989	1289	1140	493	346	331	234	178	212	176	92	43	46	38	36	47	32	34	34	37	47	16	Predicted protein	PTPEPC2
Phatr3_J46508	3	2	0	11	7	2	0	2	0	4	6	1	2	2	2	2	5	2	4	3	1	13	0	3	1	2	2	5	4	1	Predicted protein
Phatr3_J46509	252	213	74	162	174	170	80	89	59	77	82	48	111	132	100	104	87	89	183	154	169	171	232	163	141	127	125	158	145	125	Predicted protein
Phatr3_J5288	382	346	342	387	293	336	450	520	460	636	518	333	277	261	280	206	269	172	395	466	447	410	329	323	486	376	387	270	305	319	Predicted protein
Phatr3_J46511	109	97	35	88	77	95	178	200	152	227	163	101	56	60	59	40	61	38	49	86	81	62	38	61	89	90	73	47	43	35	Predicted protein
Phatr3_J13095	983	959	667	827	831	811	1022	992	774	1219	1105	473	921	1056	914	974	945	875	1259	1214	1191	1265	1138	1098	1184	928	938	1029	1173	1184	Predicted protein
Phatr3_J46513	1546	1275	372	908	953	1137	646	456	623	496	469	233	1205	921	687	778	618	591	1147	1052	1235	957	947	1000	950	1263	1285	987	833	987	Predicted protein
Phatr3_J46514	355	365	197	396	341	321	211	186	216	289	236	135	249	256	189	254	233	240	340	314	330	411	416	375	328	268	284	351	301	299	Predicted protein
Phatr3_J36485	901	817	626	742	669	688	481	461	359	537	542	316	543	408	460	416	363	334	744	648	578	685	643	555	438	390	411	505	558	522	Predicted protein
Phatr3_J20857	1182	1041	157	1040	730	1062	675	771	567	898	825	392	626	712	724	557	692	536	1042	1026	1025	1035	1016	894	1252	868	882	915	828	734	Predicted protein
Phatr3_J46516	629	569	75	344	562	532	453	451	435	823	806	417	969	1314	1026	1461	1292	1628	3337	2947	2817	4808	4017	3585	1892	1321	1444	3454	3365	3255	Predicted protein
Phatr3_J13150	1072	960	472	921	954	999	762	810	735	956	900	470	979	981	1033	923	848	959	885	906	922	655	680	736	1404	1097	1147	659	600	591	Predicted protein
Phatr3_J46518	333	285	242	318	212	285	151	124	135	192	126	70	148	165	135	135	103	113	132	120	104	158	124	132	133	94	72	113	127	89	Predicted protein
Phatr3_J46519	1	2	0	4	6	5	3	0	0	3	4	2	6	2	5	0	1	3	1	1	5	20	6	5	4	6	2	4	2	3	Predicted protein
Phatr3_EG02287	436	488	58	435	345	471	346	356	360	363	357	213	432	473	406	427	330	403	477	482	494	615	528	557	558	509	446	411	477	475	Predicted protein
Phatr3_J46522	3542	3450	2787	3045	3305	3102	5687	6135	5469	6956	6375	3328	4842	5461	4944	4776	5022	5226	5269	5090	4941	6212	5894	5090	4556	3773	3625	5128	5553	5383	Predicted protein
Phatr3_J46523	31	18	9	22	26	22	18	8	8	25	9	4	10	12	11	19	8	19	14	18	14	8	17	9	16	23	35	21	11	10	NA
Phatr3_J46524	701	588	315	657	563	625	452	450	464	544	592	287	373	301	282	257	207	191	212	215	218	180	156	211	189	174	194	181	120	182	Predicted protein
Phatr3_EG00759	479	526	146	1563	1126	1502	1324	1700	1487	2235	2045	1127	771	1026	1020	787	901	841	445	1062	897	408	450	364	2336	1024	1266	429	398	351	NA
Phatr3_J46526	1086	975	455	884	822	979	335	292	276	354	303	171	375	379	384	341	323	262	338	313	365	316	321	362	308	382	337	280	330	272	Predicted protein
Phatr3_J46527	807	754	96	774	570	792	384	323	344	431	378	210	339	396	355	344	343	282	383	255	328	366	325	378	328	340	302	404	389	339	Predicted protein
Phatr3_J36499	249	247	110	161	191	219	106	99	101	131	112	66	222	174	176	213	171	193	133	109	112	120	99	108	123	111	94	104	93	80	Predicted protein
Phatr3_J46528	32	15	2	17	11	18	14	3	10	9	6	9	13	10	15	10	30	22	24	9	12	28	24	26	11	7	18	9	25	15	Predicted protein
Phatr3_J36501	449	398	297	381	365	391	250	209	176	270	214	106	255	253	259	240	232	201	303	356	303	266	294	260	335	343	344	252	236	283	Predicted protein
Phatr3_J36502	377	339	171	335	327	313	158	115	119	215	218	112	68	30	47	379	300	324	3	1	1	25	35	21	1	4	1	25	35	27	Predicted protein
Phatr3_J46529	44323	39361	56124	39584	33123	34128	8990	6388	8243	13393	12116	7331	868	562	513	4386	3666	4108	73	33	43	245	283	341	21	20	17	221	289	248	Predicted protein
Phatr3_J46530	349	328	140	286	301	305	255	253	208	328	322	195	272	311	280	331	379	324	282	213	262	351	430	355	177	186	162	347	316	263	Predicted protein
Phatr3_J46531	841	709	974	886	657	664	604	506	495	689	615	314	409	321	301	295	284	304	115	60	56	85	84	126	33	25	26	77	76	68	Predicted protein
Phatr3_J13169	1698	1504	1239	1323	1439	1412	933	992	820	1284	1261	598	1196	1501	1196	1582	1533	1619	2099	1860	1978	2593	2499	2057	1774	1191	1281	2130	2191	2056	NA
Phatr3_EG00770	12	12	0	6	4	10	8	2	5	11	8	2	4	5	5	10	16	9	16	11	23	21	9	33	20	14	10	15	9	13	NA
Phatr3_J13125	449	342	762	468	359	462	409	322	264	391	344	192	100	79	82	76	65	30	67	40	29	18	24	29	97	52	50	21	19	25	Predicted protein
Phatr3_J36508	46	46	68	44	35	39	25	6	13	26	9	10	17	35	24	15	34	26	33	36	50	45	38	29	44	31	36	40	36	38	Predicted protein
Phatr3_J20872	723	682	280	644	602	693	2984	3440	3012	3116	3004	1403	1041	1466	1259	982	960	1031	2290	2349	2035	1371	1149	1113	3224	2468	2516	1224	1235	1201	NA
Phatr3_J46535	1450	1493	290	1151	1072	1174	1359	1497	1387	1569	1455	673	724	696	622	449	369	555	1215	1132	1257	847	706	1049	1133	1205	1144	644	596	592	Predicted protein
Phatr3_EG02288	4424	4095	5056	3873	3840	3956	3015	2763	3334	4196	4001	2360	5800	6628	6002	4307	3744	4215	4204	4438	4487	2636	2520	2763	5752	6698	6122	2431	2360	2218	L-ascorbate peroxidase
Phatr3_J46537	200	164	106	193	168	140	127	124	80	140	105	62	184	152	155	124	93	83	152	201	228	140	111	149	275	246	231	128	111	113	Predicted protein
Phatr3_EG00742	256	222	219	180	174	156	370	334	309	307	288	156	244	283	226	142	141	131	209	167	188	136	117	114	218	201	152	99	115	81	NA
Phatr3_EG00775	207	191	0	63	67	156	131	108	100	107	120	64	167	137	109	81	108	111	142	126	132	111	84	110	133	141	144	129	71	92	Gag-pol polyprotein
Phatr3_EG00745	0	0	0	0	0	0	0	0	0	0	0	0	0	0	0	0	0	0	0	0	0	0	0	0	0	0	0	0	0	0	NA
Phatr3_J36514	225	253	180	206	170	213	440	345	353	470	367	182	186	175	172	157	127	120	108	101	118	89	101	61	127	87	69	78	87	84	Predicted protein
Phatr3_J46539	420	319	80	787	586	517	1249	1373	1407	2162	2250	1134	114	84	101	75	82	95	26	23	39	30	25	31	53	39	48	37	37	33	Predicted protein
Phatr3_EG02531	454	434	243	528	466	456	109	124	166	187	176	105	73	78	58	43	29	44	375	412	376	239	297	241	402	219	321	162	93	116	Predicted protein
Phatr3_J36517	184	160	148	153	171	107	255	227	236	237	261	92	236	210	225	175	185	175	312	340	314	276	234	221	335	260	276	216	208	262	Predicted protein
Phatr3_EG00772	372	397	156	462	310	419	488	520	446	706	639	306	300	351	383	311	318	383	213	130	138	164	171	183	185	182	190	186	190	167	NA
Phatr3_EG00764	213	192	82	263	200	256	133	127	90	148	103	55	49	49	36	24	19	9	21	10	17	10	26	19	31	21	15	9	13	9	NA
Phatr3_EG02540	545	580	408	566	578	619	351	343	353	462	371	242	403	367	393	349	269	298	402	400	421	430	346	338	387	303	297	333	398	352	Predicted protein
Phatr3_J36520	14	20	0	29	15	26	14	17	7	20	26	16	17	5	12	18	29	5	25	28	8	16	31	16	14	22	16	18	8	28	Predicted protein
Phatr3_J46543	292	293	133	285	258	249	279	328	276	278	326	147	255	252	216	196	155	185	271	299	284	250	245	259	298	312	356	185	249	206	NA
Phatr3_EG02534	492	462	286	463	454	516	235	264	242	380	327	125	433	539	469	434	306	440	407	493	458	483	433	529	505	447	467	410	447	432	Phenylalanyl-trna synthetase class IIc family protein	PHERS
Phatr3_J46545	1143	937	222	815	650	876	802	850	827	978	913	413	512	479	380	481	440	451	413	210	228	320	311	311	188	199	136	297	283	246	NA
Phatr3_J46546	258	278	93	287	252	290	133	108	95	136	137	73	228	161	133	135	121	131	234	280	277	161	191	158	183	259	303	155	147	116	Predicted protein
Phatr3_J36525	380	403	246	364	334	319	335	312	316	323	339	191	317	289	289	245	244	302	373	395	309	366	345	359	359	270	293	320	338	295	Predicted protein
Phatr3_J46547	714	776	795	727	707	687	377	334	337	355	295	171	172	131	159	318	324	287	55	57	61	67	73	52	30	38	52	45	79	80	Predicted protein
Phatr3_J46548	894	753	372	805	646	923	1241	1223	1125	1209	1132	556	414	483	376	452	386	386	452	365	429	300	297	335	487	538	481	287	274	319	Predicted protein
Phatr3_J36528	8	3	0	2	3	8	2	2	2	1	4	6	20	15	12	10	10	10	5	3	7	3	0	2	3	10	5	6	3	2	Predicted protein
Phatr3_J36529	292	240	219	201	243	249	3	3	2	11	4	3	397	508	358	159	110	158	639	727	753	156	115	157	1026	1128	1221	121	132	147	Predicted protein
Phatr3_J54598	531	467	239	564	469	430	791	807	754	901	883	576	891	958	830	884	843	862	946	973	844	902	941	754	1085	1019	868	781	973	841	Predicted protein
Phatr3_J36531	49	54	8	51	20	28	39	45	35	63	27	22	72	73	72	44	45	30	120	114	110	74	76	68	209	138	162	73	92	73	Type II DNA topoisomerase VI subunit
Phatr3_J46550	588	462	375	539	525	510	890	875	724	901	784	332	765	776	735	745	552	605	519	641	689	650	541	608	647	551	637	603	593	583	Predicted protein
Phatr3_J46551	70	67	50	44	46	44	22	25	25	18	29	7	34	34	45	24	19	28	22	46	31	24	31	36	37	33	31	25	28	26	Predicted protein
Phatr3_J36534	329	351	205	305	260	240	76	76	88	136	133	66	426	448	416	360	390	369	532	535	555	596	545	459	640	443	469	457	570	488	Predicted protein
Phatr3_J28009	1121	1058	313	844	804	928	379	381	420	498	460	246	1371	1355	1231	706	594	586	1808	2351	2248	1203	952	1148	3512	3212	3139	1053	952	1000	Predicted protein
Phatr3_EG00721	0	0	0	0	0	0	0	0	0	0	0	0	0	0	0	0	0	0	0	0	0	0	0	0	0	0	0	0	0	0	NA
Phatr3_J13208	99	92	88	94	91	82	18	25	25	33	20	17	8	3	7	10	15	10	0	0	1	3	6	3	0	2	0	3	2	5	Predicted protein
Phatr3_J54599	431	424	130	353	330	414	410	445	416	461	377	219	355	394	337	282	266	293	380	333	364	291	329	278	376	268	291	319	316	322	Predicted protein	ALPHA--FUCOSYLTRANSFERASE
Phatr3_J46555	373	306	210	403	344	382	380	397	289	425	366	203	154	150	170	173	171	108	148	123	131	119	179	150	90	58	65	119	134	123	Predicted protein
Phatr3_J46556	158	187	203	155	170	149	87	72	68	65	62	31	91	90	91	94	69	56	135	127	85	61	93	120	152	90	101	93	69	66	Predicted protein
Phatr3_EG00719	1198	1128	322	893	867	996	1028	1008	923	1111	902	506	927	1103	1008	910	764	993	1330	1128	1280	1257	1302	1204	1060	1050	1144	948	1018	1051	NA
Phatr3_J20885	0	0	0	0	0	0	0	0	0	0	0	0	0	0	0	0	0	0	0	0	0	0	0	0	0	0	0	0	0	0	Predicted protein
Phatr3_J46559	224	222	129	209	152	142	136	125	126	159	160	86	117	89	79	90	97	100	132	81	103	157	130	127	48	38	32	113	106	113	Predicted protein
Phatr3_J46560	122	172	37	124	85	111	81	98	69	105	106	42	58	56	54	70	66	62	68	77	48	108	107	88	51	29	43	83	71	93	Predicted protein
Phatr3_EG00751	0	0	0	0	0	0	0	0	0	0	0	0	0	0	0	0	0	0	0	0	0	0	0	0	0	0	0	0	0	0	NA
Phatr3_J13119	99	142	64	98	110	65	115	128	72	95	139	61	129	92	86	80	81	107	85	99	87	97	96	92	145	86	103	71	110	114	NA
Phatr3_J46561	37	39	0	24	33	43	18	31	16	33	23	21	11	14	17	15	26	26	31	17	17	33	28	25	21	28	15	23	26	24	Predicted protein
Phatr3_J46562	253	241	77	184	166	215	172	201	160	225	231	105	134	179	161	173	150	154	176	192	176	270	235	223	301	184	199	187	240	199	Predicted protein
Phatr3_J36547	2	10	0	1	7	2	5	8	0	7	6	0	7	10	2	3	2	6	9	0	1	3	7	6	3	6	2	6	1	2	Predicted protein
Phatr3_J46563	485	482	231	372	286	381	341	384	297	410	371	233	252	252	217	270	258	220	373	306	293	386	421	335	329	188	164	357	301	290	Predicted protein
Phatr3_J12963	181	153	68	114	142	116	214	228	214	255	252	125	136	163	158	134	133	154	151	141	147	113	134	111	195	160	140	122	150	144	NA
Phatr3_J46564	57	37	12	52	31	42	36	30	34	33	28	17	44	15	18	30	19	10	56	59	36	44	48	44	25	36	25	40	33	39	Predicted protein
Phatr3_J46565	252	228	92	189	162	182	133	122	157	161	121	81	163	178	117	137	152	150	187	186	180	233	183	178	252	160	137	182	172	163	Predicted protein
Phatr3_EG02529	212	213	68	258	196	233	431	389	320	477	408	160	44	41	35	42	53	39	64	44	38	61	54	41	44	33	47	46	41	41	NA
Phatr3_EG02530	431	375	258	346	352	263	339	322	346	395	367	167	326	299	258	271	249	229	355	307	356	325	315	313	385	347	299	301	301	326	Predicted protein
Phatr3_J46568	545	541	636	579	473	504	651	643	571	682	626	290	472	448	441	443	412	412	572	501	580	665	703	635	432	399	415	491	580	580	Predicted protein
Phatr3_J36555	236	152	99	197	171	145	161	117	134	127	143	66	134	110	115	110	79	82	121	89	103	79	99	75	116	70	70	68	77	66	Predicted protein
Phatr3_J46569	276	249	74	200	240	229	279	324	247	339	285	128	230	276	236	215	235	199	317	252	240	277	251	234	262	160	194	201	221	260	Predicted protein
Phatr3_J46570	179	164	37	153	144	148	123	121	107	126	123	78	105	138	143	127	139	134	217	233	209	254	215	195	302	177	207	167	188	175	Predicted protein
Phatr3_J46571	604	548	573	551	525	519	924	817	589	932	891	362	480	463	481	325	376	350	478	397	465	431	499	377	445	413	356	392	413	381	NA
Phatr3_J54602	297	350	74	592	315	407	303	201	247	255	262	169	200	165	230	270	267	172	729	316	353	690	620	647	579	278	258	480	480	470	Predicted protein
Phatr3_J46573	184	161	74	189	135	179	251	202	195	294	228	134	158	164	162	160	157	182	232	221	203	238	236	222	303	245	217	154	193	144	TPR repeat-contain kinesin light chain
Phatr3_J13034	290	281	66	241	304	346	447	526	523	539	486	272	505	679	551	627	639	765	493	557	515	767	705	672	469	451	481	713	621	630	Iron carrier
Phatr3_J3131	375	326	175	264	344	324	193	155	157	217	253	125	398	407	333	556	443	461	816	681	657	1070	986	838	522	397	380	928	905	860	Predicted protein
Phatr3_J20893	283	261	179	284	225	283	247	197	204	260	249	131	217	254	204	222	208	201	403	419	333	369	393	347	303	273	293	241	368	302	Predicted protein
Phatr3_J46577	116	133	50	130	73	118	302	301	346	410	408	189	70	72	94	110	92	131	135	68	73	130	133	118	54	52	32	73	100	78	NA
Phatr3_J46578	811	747	244	765	636	699	715	658	696	1039	1107	594	397	378	400	765	581	578	415	360	360	648	573	648	385	281	318	451	481	442	NA
Phatr3_J36566	299	261	225	212	234	242	269	253	258	268	228	121	330	358	303	330	266	301	219	300	328	325	276	302	311	287	321	278	288	275	Predicted protein
Phatr3_J46579	198	198	175	195	168	184	450	448	444	516	505	197	275	312	280	255	196	255	171	142	127	127	153	129	111	133	119	122	146	107	Predicted protein
Phatr3_J36568	0	0	0	0	0	0	0	0	0	0	0	2	0	0	0	0	0	0	0	0	0	0	0	0	0	0	0	0	0	0	Predicted protein
Phatr3_J36569	134	120	64	84	107	96	123	149	90	124	121	56	139	96	118	112	76	89	113	120	113	124	122	108	120	70	94	101	118	101	Predicted protein
Phatr3_J36570	140	191	30	153	142	161	93	59	71	96	68	36	118	75	96	64	59	52	110	67	88	96	67	88	113	64	67	63	80	74	Predicted protein
Phatr3_J46580	23	26	0	15	15	30	15	18	16	36	24	11	16	22	16	7	12	13	12	17	17	12	23	15	13	14	8	20	11	16	Predicted protein
Phatr3_EG01996	427	421	58	373	315	302	274	310	247	377	353	153	274	241	263	227	181	211	264	243	259	257	260	274	229	181	196	242	228	211	NA
Phatr3_EG01995	132	119	104	168	108	122	125	115	90	106	119	52	43	48	63	54	38	14	78	53	44	32	35	40	115	71	53	34	20	35	NA
Phatr3_EG02432	271	226	24	240	165	201	267	305	318	322	265	115	118	136	129	112	90	93	140	123	104	80	72	80	185	129	125	76	49	75	Predicted protein
Phatr3_EG02430	105	73	12	47	44	74	102	143	112	107	92	33	67	53	31	56	46	49	54	30	53	42	30	32	93	44	75	52	23	30	Predicted protein
Phatr3_EG00749	859	775	386	871	736	881	845	750	753	890	819	337	147	160	136	107	75	79	44	10	13	23	15	17	21	20	18	14	10	11	NA
Phatr3_J12990	399	384	390	336	366	394	331	327	301	415	381	176	383	412	393	339	379	366	594	598	510	624	614	494	620	462	479	497	519	481	Predicted protein
Phatr3_J36578	40	41	106	44	68	29	26	26	31	35	46	36	23	35	17	22	18	17	31	14	17	13	23	24	25	21	18	22	9	11	Predicted protein
Phatr3_J20899	212	214	0	211	142	195	111	117	122	152	124	79	108	81	85	82	92	67	107	101	108	91	72	114	117	97	88	98	77	90	Predicted protein
Phatr3_J46586	249	207	73	229	228	229	112	123	111	130	106	84	228	248	217	238	179	213	259	271	275	316	268	293	239	258	211	279	277	261	Predicted protein
Phatr3_EG02000	0	2	0	6	4	5	0	0	0	5	7	0	4	0	1	1	1	1	1	0	0	6	3	1	0	0	0	0	2	1	NA
Phatr3_EG01998	0	2	0	4	0	1	0	0	0	1	0	0	0	0	0	2	2	1	0	2	0	0	1	0	0	0	0	0	1	0	NA
Phatr3_J36582	111	98	72	75	72	101	21	28	35	57	34	21	54	57	49	51	41	42	103	98	92	99	98	98	65	69	58	64	97	72	Predicted protein
Phatr3_J13073	1551	1380	1101	1480	1342	1294	3897	4284	4111	4594	4455	2764	4916	6256	6357	7733	7067	7513	3391	4560	4440	7085	6468	6739	1728	1394	1746	6242	5717	6300	3-oxoacyl-[acyl-carrier protein	FABG
Phatr3_EG00776	219	209	0	208	176	196	301	387	334	426	340	161	244	245	230	237	196	242	214	198	182	243	220	200	189	145	155	218	201	200	NA
Phatr3_J46588	595	462	199	447	396	461	354	360	348	455	379	223	247	262	210	293	205	249	396	324	324	469	479	382	315	275	231	421	406	357	Predicted protein
Phatr3_EG00760	403	374	64	314	303	279	203	231	187	260	223	136	298	323	293	328	298	286	280	330	351	395	336	414	241	216	260	326	287	346	NA
Phatr3_J5769	1017	806	1039	937	815	827	996	994	917	1191	1123	569	1082	1130	1073	1158	1053	1074	963	992	1035	1202	1047	1114	967	910	918	1031	1020	1017	Predicted protein
Phatr3_EG00718	481	461	229	441	535	423	357	343	393	497	437	295	719	790	598	750	713	675	854	783	763	954	863	777	946	947	826	844	809	891	NA
Phatr3_EG00779	569	489	178	495	463	576	412	415	339	464	468	220	311	370	285	281	269	242	525	497	476	538	479	475	717	468	424	516	428	412	NA
Phatr3_J36586	5	1	0	1	2	7	0	2	4	2	4	2	0	1	2	5	6	4	2	1	5	6	4	1	2	1	3	0	6	1	Predicted protein
Phatr3_J20905	244	210	139	247	211	250	77	65	54	99	96	39	59	43	37	101	123	84	26	21	17	124	121	110	5	9	8	108	109	86	Predicted protein
Phatr3_J13192	352	280	88	312	236	278	242	178	185	322	298	128	261	322	255	276	286	336	472	451	401	496	447	462	300	234	262	405	427	376	Predicted protein
Phatr3_J36589	77	81	0	92	73	92	85	103	80	124	78	47	64	74	85	72	81	54	190	152	159	145	157	147	157	137	108	112	109	117	Predicted protein
Phatr3_EG00724	43	31	87	31	26	17	17	21	27	12	23	5	30	61	48	28	21	22	32	33	41	35	50	47	51	30	25	33	36	51	NA
Phatr3_J36590	858	758	910	510	519	534	287	232	285	292	250	145	513	412	301	358	229	196	422	390	416	394	333	406	357	331	356	346	353	380	Predicted protein
Phatr3_J13057	1663	1386	515	1205	1156	1123	946	862	723	1227	1196	586	1224	1476	1280	1327	1408	1426	2960	2644	2412	3134	2723	2441	2516	1761	1922	2436	2656	2386	NA
Phatr3_J46593	1004	931	282	946	984	844	1102	1303	1056	1288	1192	646	1363	1812	1752	1140	1361	1226	1501	1768	1402	1004	979	770	3015	2000	1982	874	1018	895	Predicted protein
Phatr3_J12989	708	625	222	473	606	630	280	272	288	354	336	231	891	883	774	893	772	851	1307	1137	1126	1557	1511	1553	741	710	749	1315	1239	1324	Predicted protein
Phatr3_J46595	1276	1156	744	887	1136	1022	1076	1005	1074	1194	1104	667	1611	2045	1784	1768	1597	1704	2102	2264	2102	2555	2499	2198	2091	1648	1733	2165	2311	2175	Predicted protein
Phatr3_J36595	102	89	12	81	70	96	64	67	63	79	57	30	48	92	67	66	97	65	97	113	116	131	97	93	166	119	107	103	101	68	Predicted protein
Phatr3_J13175	467	461	445	869	627	798	447	582	426	432	484	216	165	164	193	139	178	151	283	257	229	239	231	225	323	207	209	145	244	190	Predicted protein
Phatr3_J46597	135	127	36	713	689	713	90	89	121	245	184	95	17	10	12	19	18	10	17	10	3	9	11	21	28	15	17	9	3	6	Predicted protein
PTsRNA00036a	0	0	0	0	0	0	0	0	0	0	0	0	0	0	0	0	0	0	0	0	0	0	0	0	0	0	0	0	0	0	NA
EPrPhatr3G00000013112	0	0	0	1	0	0	0	0	0	0	0	0	0	0	0	0	0	0	0	0	0	0	0	0	0	0	0	0	0	0	NA
Phatr3_J36597	2833	2450	1401	2572	2060	2667	4450	4280	3832	4563	4086	2106	2801	4111	3722	3477	3720	4505	1037	1470	1228	1297	1328	1264	2096	1467	1735	1209	1188	1246	Predicted protein	SCDC48
Phatr3_J36598	77	70	79	72	52	70	154	155	129	177	153	59	38	51	46	33	35	49	51	31	32	33	44	29	29	27	19	19	40	22	NA
Phatr3_J46599	4467	3922	4440	3748	3563	3472	7646	7670	6937	8008	7493	3848	3089	3190	2977	3403	2982	3116	1503	1421	1466	1910	1884	1802	1293	1191	1105	1682	1744	1862	Predicted protein	CLC
Phatr3_J36600	5034	4142	13807	5157	4889	4221	2541	2141	1666	2858	2868	1640	2500	1977	1963	2923	2464	2089	1657	1464	1479	2826	2790	2458	649	821	699	2078	2560	2418	Predicted protein
Phatr3_J46600	386	406	267	342	400	378	616	627	454	608	593	216	405	466	370	413	293	338	375	362	377	423	479	418	267	312	346	372	378	360	Predicted protein
EPrPhatr3G00000013103	0	0	0	0	0	0	0	0	0	0	0	0	0	0	0	0	0	0	0	0	0	0	0	0	0	0	0	0	0	0	NA
PTsRNA00035a	0	0	0	0	0	0	0	0	0	0	0	0	0	0	0	0	0	0	0	0	0	0	0	0	0	0	0	0	0	0	NA
Phatr3_J46601	376	400	168	398	404	376	272	299	245	232	260	177	295	406	410	255	295	238	535	483	443	486	478	518	593	434	447	381	380	461	NA
Phatr3_J46602	333	336	111	528	376	462	486	439	426	409	376	192	154	169	183	131	96	86	134	110	110	106	94	132	288	232	199	71	96	99	Predicted protein
Phatr3_J46603	62	92	73	106	92	89	44	44	49	81	58	45	30	39	48	44	29	51	63	74	68	64	79	61	49	44	33	46	60	55	Predicted protein
Phatr3_J13028	90	102	25	94	82	90	14	11	20	34	22	16	32	20	13	22	16	26	73	54	47	63	41	49	95	111	66	58	53	54	Predicted protein
Phatr3_J36606	164	155	55	140	140	130	136	122	116	172	123	67	76	64	71	46	51	33	184	157	116	104	135	122	313	192	156	81	83	80	Predicted protein
Phatr3_J46605	89	71	49	86	64	76	72	68	71	74	104	70	6	28	19	18	10	11	6	3	12	6	18	12	11	12	9	14	15	14	Predicted protein
Phatr3_J36608	320	258	175	256	235	281	481	473	423	598	568	277	210	252	202	273	321	217	207	242	220	225	228	184	390	272	283	186	216	213	Predicted protein
Phatr3_J46606	739	619	467	476	460	489	417	280	349	361	349	170	563	518	420	410	345	441	606	547	601	541	513	525	629	554	579	575	491	463	Predicted protein
Phatr3_J46607	30	31	37	22	21	32	105	130	108	123	100	51	44	26	23	35	21	30	30	28	13	15	34	23	30	22	38	31	35	27	Predicted protein
Phatr3_J36611	5	10	0	8	12	7	6	6	6	12	11	13	12	7	0	10	12	3	6	4	4	5	9	6	4	3	0	10	8	9	Predicted protein
Phatr3_J46608	1156	1064	1108	1096	906	1197	1082	1008	1006	1176	1136	510	575	527	446	368	282	333	466	389	345	194	176	206	859	622	591	156	149	157	Predicted protein
Phatr3_J13047	696	590	716	558	523	515	293	293	293	320	338	205	570	541	491	589	427	497	594	620	652	780	755	778	468	529	550	703	701	691	Adenylyl cyclase-associated protein
Phatr3_J46610	582	579	867	658	544	674	935	996	925	1221	1102	536	597	745	656	518	562	502	594	688	637	605	523	436	914	679	661	511	579	478	Predicted protein
Phatr3_J12985	97	71	41	94	89	106	19	16	17	54	35	29	332	553	464	228	287	283	623	835	676	562	414	355	1346	734	776	489	503	472	Predicted protein
Phatr3_J13107	1446	1133	629	640	1427	1071	14	22	22	29	27	26	7127	9635	9121	4293	3975	4030	9058	13182	11319	4745	4067	4198	27569	22818	22242	4645	5043	5500	Predicted protein
Phatr3_J46612	2221	2004	1474	1664	1824	1700	712	769	840	1016	961	477	1927	2077	2096	2252	2168	2106	2525	2851	2812	3940	3449	3161	2103	1807	1904	2813	3029	2931	Predicted protein
Phatr3_J46613	740	622	785	644	651	605	586	519	612	687	593	351	608	587	605	627	631	551	714	771	743	970	725	718	795	808	772	654	697	745	Predicted protein
Phatr3_J13114	228	246	134	209	175	194	208	184	158	274	183	118	244	268	343	224	224	200	361	372	313	361	322	343	394	304	316	270	289	226	NA
Phatr3_J36620	140	147	58	120	151	109	67	79	63	76	77	45	78	74	52	65	63	72	108	78	78	122	106	124	64	75	44	63	64	107	Predicted protein
Phatr3_EG00743	1306	1083	438	1060	790	967	854	899	712	1003	1020	411	626	598	523	675	524	541	862	802	867	989	884	890	866	774	762	778	830	736	NA
Phatr3_J46616	115	86	0	117	87	95	133	128	139	144	125	66	129	129	119	94	96	128	127	105	130	143	127	128	117	120	101	146	115	115	L-ascorbate peroxidase
Phatr3_EG00774	7	0	0	5	6	1	3	5	0	2	10	6	4	3	5	3	5	1	2	3	1	3	2	1	2	1	2	0	4	0	NA
Phatr3_J54611	431	401	39	380	361	331	438	409	435	527	388	252	417	368	331	298	293	286	498	431	434	493	434	480	405	376	362	432	433	395	Predicted protein
Phatr3_J46618	758	688	174	570	565	600	486	408	413	496	481	231	382	301	205	335	241	276	281	228	240	340	327	355	62	73	76	228	304	281	Predicted protein
Phatr3_J54612	312	270	78	200	234	217	173	171	129	195	173	77	179	210	150	180	144	185	148	86	102	170	212	178	40	44	28	148	104	146	Ercc4-like protein
Phatr3_J46620	337	272	469	301	314	311	483	458	285	502	414	217	338	314	270	262	197	190	232	268	248	191	229	219	193	196	227	167	191	200	Roadblock-related dynein light chain	DYNLRB
Phatr3_J46621	220	212	78	179	166	184	171	162	152	186	187	80	178	195	199	175	161	175	338	319	255	362	306	281	292	269	278	254	243	239	Predicted protein
Phatr3_J36628	205	183	389	225	189	184	188	139	171	206	207	98	259	230	264	206	221	167	221	235	282	253	243	256	370	286	272	216	218	224	Predicted protein
Phatr3_J36629	71	115	0	86	84	103	93	84	87	119	108	65	129	112	83	110	90	128	92	103	105	100	116	126	168	111	126	114	128	116	Predicted protein
Phatr3_EG00754	201	163	57	189	177	187	165	149	125	169	148	73	128	168	154	135	143	91	165	144	133	156	123	135	202	151	159	183	171	158	NA
Phatr3_J46622	463	351	278	283	278	271	192	124	178	187	155	65	311	273	186	178	184	149	226	275	250	234	158	221	314	317	295	231	208	219	Predicted protein
Phatr3_J13157	822	772	734	821	584	602	302	226	233	361	306	177	399	316	272	286	260	253	649	471	462	472	483	477	374	320	276	400	459	414	Predicted protein
Phatr3_EG02528	827	711	444	611	643	678	334	251	348	398	273	195	429	391	275	354	301	305	596	519	636	567	543	615	453	450	471	475	420	512	Predicted protein
Phatr3_J36633	118	70	8	77	74	82	15	3	23	11	12	9	16	12	3	7	11	4	14	5	16	18	42	24	7	5	10	11	19	14	Predicted protein
Phatr3_J36634	313	266	116	246	231	225	199	181	202	207	185	99	180	214	187	177	189	161	223	182	174	166	189	188	225	191	202	176	183	189	Predicted protein
Phatr3_J36635	192	173	197	206	175	183	130	114	118	158	123	76	104	80	95	84	68	61	82	116	93	95	61	77	101	122	103	62	90	85	Predicted protein
Phatr3_J13078	6349	6161	3025	8238	6588	8273	4834	4682	4631	6437	6042	3240	2561	2792	2626	3041	3011	3217	1715	1517	1715	1411	1461	1603	3344	2653	2749	1674	1603	1600	Predicted protein
Phatr3_J46625	592	632	314	655	613	591	285	220	192	241	247	98	515	476	456	367	273	295	496	535	570	436	390	365	817	910	704	426	505	524	Predicted protein
Phatr3_J46626	920	907	651	719	716	743	732	613	608	837	810	464	990	926	952	950	855	864	748	790	848	923	860	801	823	782	752	704	802	908	Predicted protein
Phatr3_J28056	562	526	370	504	426	435	173	157	226	263	199	106	104	73	72	70	78	92	148	109	126	99	101	96	130	88	95	102	112	74	Predicted protein
Phatr3_J46628	110	86	34	73	70	70	39	32	28	42	46	43	16	19	24	11	4	5	24	22	31	24	15	27	27	18	18	13	20	12	Predicted protein
Phatr3_J36641	671	558	199	616	565	653	433	434	472	619	614	325	338	350	334	366	270	404	419	288	369	531	507	486	119	119	170	458	397	391	Predicted protein
Phatr3_J3061	471	394	66	313	380	387	910	929	975	923	779	475	323	487	429	370	409	519	81	162	120	103	112	111	364	278	336	89	75	98	Predicted protein
Phatr3_J20934	3942	3472	5516	3458	3032	3302	4852	4967	5060	5147	4946	2324	1538	1649	1637	1873	1790	2074	933	957	873	1370	1223	1115	943	630	762	981	961	921	3-isopropylmalate dehydrogenase	IPMDH
Phatr3_EG00729	670	726	341	641	574	808	461	547	513	646	552	274	491	564	458	508	584	612	454	345	397	483	462	452	641	353	352	467	474	419	NA
Phatr3_J46632	349	268	176	306	333	316	323	402	280	420	468	184	321	462	348	367	294	308	285	316	298	300	243	287	388	323	349	249	259	331	Predicted protein
Phatr3_EG00767	1	4	0	6	4	1	0	0	0	0	0	2	11	9	27	17	20	15	2	3	5	5	4	3	11	2	1	3	3	1	NA
Phatr3_EG00734	0	0	0	0	0	0	0	0	2	0	0	0	1	0	0	0	0	0	0	0	0	0	0	1	0	0	0	0	0	0	NA
Phatr3_EG00744	0	2	14	2	0	1	0	0	0	0	0	0	0	1	5	1	1	2	2	1	0	0	0	1	0	3	0	1	6	0	NA
Phatr3_J13031	208	216	127	286	217	268	217	141	159	197	183	97	46	29	34	28	26	20	69	48	43	41	48	47	53	42	50	41	38	34	Predicted protein
Phatr3_J36647	70	61	73	91	89	86	66	51	48	104	95	32	55	63	44	55	55	67	224	162	147	269	224	161	161	69	108	184	176	149	Predicted protein
Phatr3_EG00788	6	11	0	5	5	9	2	10	1	7	8	5	0	1	0	3	5	1	1	2	3	3	3	3	1	4	1	13	4	4	NA
Phatr3_J36648	0	0	0	0	0	0	1	7	0	2	0	0	0	0	0	0	0	0	0	0	0	0	0	0	0	0	0	0	0	0	Predicted protein
Phatr3_EG00806	0	0	0	1	0	0	0	0	0	0	0	0	0	0	0	0	0	0	0	0	0	0	0	0	0	0	0	0	0	0	NA
Phatr3_J36649	366	341	168	315	248	324	348	349	325	415	303	172	310	283	301	281	323	261	475	306	387	596	464	441	400	269	207	418	365	345	Predicted protein
Phatr3_J13439	0	0	0	0	0	0	0	0	0	0	0	0	0	0	0	0	0	0	0	0	0	0	0	0	0	0	0	0	0	0	Predicted protein
Phatr3_EG00840	0	0	0	0	0	0	0	0	0	0	0	0	0	0	0	0	0	0	0	0	0	0	0	0	0	0	0	0	0	0	NA
Phatr3_EG00831	0	0	0	0	0	0	0	0	0	0	0	0	1	0	0	0	0	0	0	0	0	0	0	0	0	0	0	2	0	0	NA
Phatr3_EG00822	0	0	0	0	0	0	0	0	0	0	0	0	0	0	0	0	0	0	0	0	0	0	0	0	0	0	0	0	0	0	NA
Phatr3_EG00858	0	0	0	0	0	0	0	0	0	0	0	0	0	0	0	0	0	0	0	0	0	0	0	0	0	0	0	0	0	0	NA
Phatr3_EG00837	0	0	0	0	0	0	0	0	0	0	0	0	0	0	0	0	0	0	0	0	0	0	0	0	0	0	0	0	0	0	NA
Phatr3_EG00826	1	0	0	0	0	0	0	0	0	0	0	0	0	0	0	0	0	0	0	0	0	1	0	0	0	0	0	1	0	0	NA
Phatr3_EG00847	0	0	0	0	0	0	0	0	0	0	0	0	0	0	0	0	0	0	0	0	0	0	0	0	0	0	0	0	0	0	NA
Phatr3_EG00838	0	0	0	0	0	0	0	0	0	0	0	0	0	0	0	0	0	0	0	0	0	0	0	0	0	0	0	0	0	0	NA
Phatr3_EG00863	0	0	0	0	0	0	0	0	0	0	0	0	0	0	0	0	0	0	0	0	0	0	0	0	0	0	0	0	0	0	NA
Phatr3_EG00823	0	0	0	0	0	0	0	0	0	0	0	0	0	0	0	0	0	0	0	0	0	0	0	0	0	0	0	0	0	0	NA
Phatr3_EG00790	0	0	0	0	0	0	0	0	0	0	0	0	0	0	0	0	0	0	0	0	0	0	0	0	0	0	0	0	0	0	NA
Phatr3_EG00801	0	0	0	0	0	0	0	0	0	0	0	0	0	0	0	1	0	0	0	0	0	0	0	0	0	0	0	0	0	0	NA
Phatr3_EG00783	1	2	0	0	0	0	1	0	0	0	0	0	1	0	0	0	0	0	0	0	0	0	0	0	0	0	0	0	0	0	NA
Phatr3_J46635	478	400	132	362	218	347	216	190	188	272	262	120	277	304	229	247	238	191	346	262	318	353	309	342	268	190	242	287	324	267	Predicted protein
Phatr3_J46636	939	750	1025	869	742	803	746	670	566	806	689	396	397	381	370	283	278	216	253	228	191	81	76	100	406	335	343	61	92	61	Predicted protein
Phatr3_J46637	206	223	82	227	167	223	264	243	168	238	247	104	144	148	170	113	92	115	263	190	194	149	141	146	262	154	200	118	154	112	NA
Phatr3_EG00816	464	333	142	329	274	344	253	245	194	325	306	149	335	311	291	328	281	384	391	394	394	583	565	628	272	259	259	501	455	441	NA
Phatr3_J46639	495	580	390	560	425	537	200	168	214	232	218	144	165	164	142	108	83	104	344	274	240	185	207	155	380	285	251	135	167	157	Predicted protein
Phatr3_EG00850	231	232	67	230	178	212	261	289	311	318	267	136	220	297	316	312	258	264	314	377	345	340	345	328	356	277	349	365	350	304	NA
Phatr3_J46641	690	636	278	563	574	611	542	532	500	741	595	330	476	471	405	355	304	366	528	442	517	386	361	398	617	425	472	319	325	267	Predicted protein
Phatr3_J46642	103	98	86	117	118	102	206	185	173	220	241	114	111	113	85	82	73	77	29	58	46	34	17	38	93	65	63	40	35	30	Predicted protein
Phatr3_J46643	396	385	319	363	329	299	398	340	365	428	429	201	602	754	703	645	580	683	556	511	550	714	541	562	513	472	509	548	540	509	Predicted protein
Phatr3_J3639	4537	4001	2193	3769	3497	4124	855	734	784	887	758	363	754	494	433	816	740	815	55	39	55	158	185	302	25	54	43	231	233	200	Myo-inositol 2-dehydrogenase putative
Phatr3_J46645	319	304	127	308	259	316	164	181	205	231	214	163	395	406	380	407	369	331	353	367	412	376	290	329	556	442	476	309	338	389	Predicted protein
Phatr3_J36662	277	274	176	277	231	236	398	407	317	495	501	209	361	361	364	332	332	309	221	256	217	211	204	251	310	268	311	248	216	226	Predicted protein
Phatr3_J28068	371	363	428	426	295	398	124	124	154	273	227	80	54	49	56	37	32	60	31	31	25	7	15	16	90	51	49	5	14	13	Beta-ketoacyl-CoA thiolase	KCT3
Phatr3_J46647	347	365	171	328	242	372	308	343	308	409	409	182	203	186	137	138	111	183	190	197	220	162	138	163	296	283	289	128	120	116	Predicted protein
Phatr3_EG02295	3869	3230	1615	3136	2298	3043	2575	3011	2622	3266	3019	1437	1124	1138	899	1321	1176	1166	1289	695	812	1318	1271	1275	350	305	251	1082	1133	971	Predicted protein
Phatr3_EG00857	70	62	10	54	40	61	24	34	44	39	33	24	42	26	31	30	39	22	84	35	38	44	66	48	77	35	32	60	50	61	NA
Phatr3_J36666	413	373	344	405	404	417	99	77	90	104	90	44	133	76	70	171	113	145	45	31	18	57	41	48	30	36	31	44	53	56	Predicted protein
Phatr3_J54619	200	169	95	260	179	195	456	496	358	522	444	230	177	201	139	134	118	119	135	142	127	163	135	137	218	143	168	101	123	103	COP9 SigNalosome subunit 3	CSN3
Phatr3_J36668	404	349	224	322	339	366	73	88	56	116	89	39	156	131	110	130	157	142	451	396	311	325	363	298	463	333	321	227	260	250	Predicted protein
Phatr3_J20948	3766	3032	3134	2814	2879	2382	7053	6241	4624	7311	6388	3515	12374	12632	13388	10417	10862	9026	12126	14279	12424	10369	9449	9077	17284	17680	17414	8659	9146	9247	Predicted protein
Phatr3_J13505	476	424	144	373	403	430	984	930	698	940	844	360	416	432	324	259	216	245	324	297	338	146	128	169	598	651	664	162	119	92	Predicted protein
Phatr3_J46653	333	260	120	379	248	274	78	50	70	77	81	32	25	13	14	27	7	8	15	14	7	20	7	13	8	8	8	4	5	4	Predicted protein
Phatr3_EG00789	0	0	0	0	0	0	0	0	0	0	0	0	0	0	0	0	0	0	0	0	0	0	0	0	0	0	0	0	0	0	NA
Phatr3_J13418	1534	1436	530	1336	1379	1345	1040	940	851	1174	1143	678	617	621	552	650	593	611	817	857	881	864	708	822	837	741	717	612	594	707	Predicted protein
Phatr3_J54621	1058	837	575	926	623	732	424	291	360	539	489	286	530	507	454	656	500	602	340	201	259	573	562	578	80	92	73	396	404	411	NA
Phatr3_J46656	539	473	291	478	462	532	190	144	170	299	246	124	564	545	491	387	409	492	231	188	218	85	107	203	392	368	340	121	118	97	Predicted protein
Phatr3_J46657	15	18	17	27	25	16	23	21	8	15	14	12	10	8	4	7	7	12	9	6	2	2	5	7	12	6	8	8	10	2	Cytochrome b6-f complex iron-sulfur subunit	PETC
Phatr3_J13358	11377	10546	17715	9845	9545	9239	6570	6099	5986	7614	6692	3817	12667	13212	12586	12324	10993	10669	7350	8268	8867	9819	9068	9354	8161	9090	8377	8464	8733	9115	Cytochrome b6-f complex iron-sulfur subunit
Phatr3_J46659	774	553	294	445	442	476	179	118	101	167	127	73	292	334	212	266	200	183	541	409	481	576	540	595	392	428	403	429	489	421	Predicted protein
Phatr3_J52094	295	311	125	220	216	245	261	214	237	321	364	177	321	435	395	453	428	410	737	870	685	914	929	840	441	410	485	761	686	674	NA
Phatr3_J46661	599	467	147	518	458	395	209	177	209	215	205	143	273	272	172	202	164	157	470	454	451	297	288	303	451	368	353	212	241	215	Predicted protein
Phatr3_J46662	395	362	405	481	426	416	109	76	85	104	69	46	548	685	685	138	129	112	1399	1782	1448	160	117	114	3700	2511	2639	138	164	149	Predicted protein
Phatr3_J46663	598	539	116	460	474	505	371	438	384	453	453	214	473	530	560	470	468	523	344	437	373	384	329	458	387	344	383	391	336	327	Predicted protein
Phatr3_J13383	148	157	29	133	98	149	84	115	105	120	128	42	34	28	23	29	22	19	44	28	58	30	21	44	17	36	24	32	14	20	Predicted protein
Phatr3_J46664	245	236	120	236	202	242	167	179	149	168	180	75	92	83	87	73	52	68	53	46	40	59	45	62	41	47	33	40	30	30	Predicted protein
Phatr3_EG00803	0	0	0	0	0	0	0	0	0	0	0	0	0	0	0	0	0	0	0	0	0	0	0	0	0	0	0	0	0	0	NA
Phatr3_EG00793	0	0	0	0	0	0	0	0	0	0	0	0	0	0	0	0	0	0	0	0	0	0	0	0	0	0	0	0	0	0	NA
Phatr3_J13476	417	430	377	447	412	434	888	925	810	950	811	334	187	214	140	95	59	100	76	42	40	32	28	47	120	116	122	33	17	15	Predicted protein
Phatr3_EG00836	0	0	0	0	0	0	0	0	0	0	0	0	0	0	0	0	0	0	0	0	0	0	0	0	0	0	0	0	0	0	NA
Phatr3_J13235	126	156	76	97	133	109	203	242	241	348	290	137	307	388	322	394	430	384	1387	1173	1113	1610	1326	1040	892	634	679	1165	1220	1132	Fructose-bisphosphate aldolase
Phatr3_J46667	150	101	31	121	90	91	47	43	34	65	40	16	68	49	60	51	57	43	124	120	116	104	80	92	149	93	119	93	81	79	NA
Phatr3_J46668	495	474	133	348	413	390	240	231	278	319	321	144	358	236	264	249	184	186	261	158	166	170	144	195	104	134	103	144	151	137	Predicted protein
Phatr3_J3578	304	255	55	178	270	213	283	262	269	401	350	230	536	532	445	615	446	561	1097	1061	992	1641	1245	1152	658	520	590	1126	1073	1021	tRNA pseudouridine synthase
Phatr3_J13331	509	445	112	398	385	476	131	109	141	166	155	92	248	144	152	128	97	115	218	157	234	156	115	166	147	175	188	124	127	130	Predicted protein
Phatr3_J36690	287	267	38	218	239	225	349	422	316	499	382	179	385	341	387	414	350	399	415	458	376	537	536	429	399	290	338	385	523	444	Predicted protein
Phatr3_EG00864	0	0	0	0	0	0	74	163	32	17	8	0	0	0	3	0	0	0	0	0	0	0	1	0	0	0	0	0	0	1	NA
Phatr3_EG00861	0	0	0	0	0	0	0	0	0	0	0	0	0	0	0	0	0	0	0	0	0	0	0	0	0	0	0	0	0	0	NA
Phatr3_J13520	348	340	854	332	363	337	650	687	613	692	587	342	507	582	574	417	446	458	347	457	406	424	382	367	439	372	423	383	382	348	Predicted protein
Phatr3_J46671	328	305	71	265	280	276	378	389	388	337	347	208	361	491	391	350	360	380	513	531	550	471	397	437	461	385	482	323	413	347	Predicted protein
Phatr3_EG02011	176	151	126	159	137	132	194	152	149	181	200	91	194	239	231	176	168	140	258	243	259	233	182	196	279	279	248	214	227	216	NA
Phatr3_EG00791	29	33	0	18	26	32	73	74	71	65	69	32	54	69	61	89	56	75	51	45	62	56	49	62	69	56	49	52	88	51	NA
Phatr3_EG02004	337	303	189	293	235	301	242	238	294	352	332	164	163	141	126	173	163	183	117	97	99	110	138	112	81	68	87	144	125	114	NA
Phatr3_EG02010	110	105	0	106	81	123	122	115	115	129	112	57	79	61	60	63	71	71	66	51	47	52	65	57	37	39	31	71	65	72	NA
Phatr3_J46673	1443	1205	1145	1003	932	1134	629	577	528	597	554	258	879	776	625	605	517	482	762	738	845	613	561	693	927	991	922	608	563	592	Predicted protein
Phatr3_J13244	1102	1016	600	1115	838	987	51	43	63	91	76	59	3	0	1	2	4	9	0	2	0	4	9	0	8	0	5	0	0	7	Predicted protein
Phatr3_J46675	579	483	410	500	418	399	167	78	166	204	161	99	126	75	90	143	89	98	77	63	56	94	100	121	24	21	19	74	76	77	Predicted protein
Phatr3_J46676	710	657	353	640	640	675	2684	3060	2922	3349	3297	2367	616	747	586	744	1064	912	783	958	733	905	732	700	858	540	494	790	786	555	Predicted protein
Phatr3_J46677	74	64	27	53	34	75	168	190	175	178	163	93	78	108	82	105	80	95	143	110	92	139	110	96	96	60	56	119	106	96	Predicted protein
Phatr3_EG00859	0	0	0	0	0	0	0	0	0	0	0	0	0	0	0	0	0	0	0	0	0	0	0	0	0	0	0	0	0	0	NA
Phatr3_J36699	380	336	206	346	315	294	554	563	461	586	505	267	444	488	482	338	350	359	265	229	203	243	212	219	338	286	269	229	205	193	Predicted protein
Phatr3_J13265	6076	5247	1756	4534	4219	5077	1039	760	1180	2521	2436	1312	1953	1443	1209	5516	4505	6037	99	73	88	321	362	512	55	56	41	471	401	431	Protoporphyrin IX magnesium chelatase, subunit H	CHLH
Phatr3_EG00846	0	0	0	0	0	0	0	0	0	0	0	0	0	0	0	0	0	0	3	2	0	0	0	0	1	0	0	0	0	0	NA
Phatr3_J42051	499	469	226	569	448	479	639	411	443	652	489	248	172	142	95	160	133	168	110	38	59	18	20	26	185	198	203	16	18	18	Predicted protein
Phatr3_J13365	761	650	305	572	580	581	424	361	339	510	461	270	524	536	449	519	521	546	669	705	698	838	947	828	487	460	432	709	755	715	NA
Phatr3_J13221	279	267	165	266	246	239	327	290	279	371	336	174	304	258	249	268	255	200	299	275	271	357	310	326	271	218	252	276	254	262	Predicted protein
Phatr3_J1103	1005	958	203	960	819	897	505	572	564	832	627	360	544	483	378	391	360	359	406	358	354	299	324	364	565	366	406	281	280	283	Predicted protein
Phatr3_J1864	390	296	113	299	334	286	269	273	284	303	272	145	240	177	189	209	232	232	149	105	113	155	129	160	183	121	139	203	154	170	Predicted protein
Phatr3_J46684	1109	905	176	1020	849	964	278	286	261	346	321	153	422	414	304	363	367	237	446	368	316	512	375	409	554	428	358	436	411	306	Predicted protein
Phatr3_EG02294	418	382	25	347	343	393	193	162	171	225	202	97	9	10	9	10	3	5	30	18	7	27	16	17	7	34	15	13	14	9	Predicted protein
Phatr3_J21006	609	561	141	514	544	486	337	304	315	408	358	223	477	530	505	365	292	325	575	424	342	311	259	344	647	433	411	311	294	266	Predicted protein
Phatr3_J46687	973	791	179	918	784	962	835	870	864	1012	908	512	570	521	453	551	439	476	339	204	209	323	341	346	74	109	115	259	272	250	Predicted protein
Phatr3_J46688	292	288	246	270	264	318	378	339	270	424	347	141	226	189	169	181	169	95	235	180	166	163	135	158	230	173	158	122	110	111	Predicted protein
Phatr3_J36711	351	327	575	239	255	272	1227	1358	998	1230	1047	433	421	471	486	322	331	304	371	507	489	415	385	346	537	413	493	323	370	363	NA
Phatr3_J13313	502	480	312	384	377	336	90	127	134	170	170	80	848	1024	935	888	851	794	1255	1579	1291	1233	976	906	2201	1663	1691	931	991	1214	Predicted protein
Phatr3_J13511	1819	1856	825	1679	1609	1790	1189	1200	1078	1495	1318	723	1022	1053	877	1085	970	1104	1056	1064	1030	1428	1347	1368	894	798	873	1111	1047	1100	Predicted protein
Phatr3_J46690	487	481	392	1288	545	870	206	147	202	246	223	86	30	20	8	12	8	8	8	7	5	4	5	9	11	1	12	4	10	14	Predicted protein
Phatr3_J13254	208	284	11	248	211	227	187	181	198	262	182	146	262	332	341	279	299	243	288	396	319	231	215	186	514	377	402	214	222	248	Sulfhydryl oxidase
Phatr3_J46692	168	193	16	132	145	155	120	176	119	185	153	88	132	149	122	136	109	141	180	130	110	170	155	154	197	100	86	157	138	164	Predicted protein
Phatr3_EG00784	1029	988	757	1012	863	908	1352	1407	1165	1634	1529	792	424	508	573	609	716	692	64	109	62	102	128	88	155	64	61	94	97	60	NA
Phatr3_J13396	1972	1735	568	1550	1444	1638	2196	2343	1954	2451	2221	1208	1468	1778	1544	1622	1638	1810	1673	1559	1591	2003	1983	1766	1644	1332	1417	1533	1630	1630	Predicted protein
Phatr3_J46694	636	573	465	687	654	617	209	143	165	260	241	108	488	683	522	453	415	527	730	764	727	623	493	501	1352	1308	1149	501	391	503	Predicted protein
Phatr3_J36719	197	215	38	182	162	207	192	243	200	261	273	148	196	197	203	212	202	201	232	259	230	268	227	223	226	221	240	206	184	206	Predicted protein
Phatr3_J36720	512	463	101	484	395	430	401	495	351	522	427	266	415	423	398	374	369	397	470	440	506	490	493	481	502	465	442	474	378	419	Predicted protein	VPS45
Phatr3_EG00851	227	163	259	146	168	116	427	408	319	406	330	196	157	182	151	135	137	111	161	136	152	158	151	192	144	144	127	126	137	127	NA
Phatr3_J28147	2635	2007	4333	2561	1926	1900	3044	2017	1337	2623	2254	1428	2318	2143	2165	2211	1624	1435	2298	2678	2951	2550	2535	2730	1356	2049	1953	1856	1960	2293	Predicted protein
Phatr3_J36721	835	673	230	663	604	680	704	641	656	766	659	393	661	814	719	798	643	620	760	860	840	1056	926	1055	846	691	833	823	813	781	NA
Phatr3_J21030	1810	1532	584	1396	1296	1412	1053	992	1248	1284	1250	720	1197	1264	1182	1186	1026	1042	853	929	971	972	854	922	1271	1133	1141	872	790	783	Predicted protein
Phatr3_J46698	293	269	9	288	211	255	92	107	117	159	166	77	127	151	124	128	103	106	303	275	292	302	235	217	472	308	306	227	232	194	Predicted protein
Phatr3_J36724	289	252	239	339	248	325	217	242	157	304	310	106	617	940	812	329	373	325	1781	2407	2115	559	416	420	4928	3354	3105	402	512	499	Predicted protein
Phatr3_J46699	499	482	343	421	394	385	358	342	294	433	332	184	377	335	345	331	312	314	328	339	316	402	348	314	335	290	257	355	325	315	Predicted protein
Phatr3_J36726	314	262	129	288	239	250	10	8	13	25	20	9	43	39	40	48	43	35	4	4	2	12	7	4	1	1	5	8	12	5	Predicted protein
Phatr3_EG02296	584	450	138	444	355	514	202	173	127	272	237	83	244	208	146	189	217	188	314	258	319	423	425	480	238	216	252	386	336	318	Predicted protein
Phatr3_J46702	280	285	151	335	309	246	185	151	157	249	189	110	218	204	202	162	177	148	247	217	289	207	264	214	202	203	193	221	167	192	Predicted protein
Phatr3_J46703	267	247	35	248	204	250	490	539	463	650	653	293	134	207	190	205	221	261	273	271	238	252	337	235	207	183	172	228	223	221	Predicted protein
Phatr3_J13243	660	570	116	402	436	466	76	105	131	162	184	107	252	228	188	237	222	220	522	434	490	643	708	584	212	253	192	518	511	531	Predicted protein	MCM7
Phatr3_EG00855	691	562	60	409	427	433	133	78	107	116	141	61	293	210	208	346	209	208	397	318	323	572	497	601	132	134	109	454	441	451	NA
Phatr3_J46705	274	273	213	223	188	199	28	42	24	31	30	18	96	64	56	71	51	35	206	117	140	171	228	228	90	110	80	122	175	178	NA
Phatr3_J36733	157	126	109	111	118	161	17	5	11	23	16	17	90	49	32	73	43	48	128	97	100	167	161	155	55	60	48	115	129	114	Predicted protein
Phatr3_J46706	909	827	431	949	681	672	613	503	518	614	589	240	395	276	225	250	165	217	99	62	99	108	79	106	63	104	46	121	81	81	Predicted protein
Phatr3_J46707	109	111	40	451	356	398	415	550	446	1013	1045	461	0	18	13	32	64	58	7	2	3	12	12	21	6	1	3	16	27	11	Predicted protein
Phatr3_J46708	537	418	94	443	403	435	101	100	118	140	140	82	209	193	204	159	167	206	451	358	379	480	380	407	241	184	168	369	352	226	Predicted protein
Phatr3_J46709	1660	1425	555	1432	1188	1421	681	583	498	816	684	287	684	562	556	639	559	531	381	308	357	435	428	423	276	347	322	378	363	417	Predicted protein
Phatr3_EG00817	0	0	0	0	0	0	0	0	0	0	0	0	0	0	0	0	0	0	0	0	0	0	0	0	0	0	0	0	0	0	NA
Phatr3_EG00827	0	0	0	0	0	0	0	0	0	0	0	0	0	0	0	0	0	0	0	0	0	0	0	0	0	0	0	0	0	0	NA
Phatr3_EG00843	4	11	0	3	2	4	2	0	0	0	2	0	1	1	3	0	0	1	7	3	2	4	9	1	0	0	2	6	2	5	NA
Phatr3_J46710	9759	8316	10813	7322	7850	8173	1037	803	1264	2141	1962	1264	6797	7242	6126	9923	8517	9957	5056	4714	5630	11181	9958	10711	1270	1882	1744	9385	8587	10487	Predicted protein
Phatr3_J46711	338	299	161	178	210	226	60	44	41	95	68	50	236	213	182	251	162	200	298	291	345	422	416	502	128	170	175	355	353	367	Predicted protein
Phatr3_J46712	215	199	68	177	146	176	201	130	188	262	230	78	223	223	203	209	198	241	199	232	235	250	209	216	241	199	202	188	195	206	tRNA (guanine-N(7)-)-methyltransferase
Phatr3_J13537	203	227	152	260	205	238	307	357	292	360	338	191	384	367	381	179	142	216	497	402	488	270	203	292	508	452	381	289	259	250	Predicted protein
Phatr3_J36742	190	183	183	181	164	188	170	223	189	241	230	103	227	226	202	158	169	169	194	256	247	237	278	244	239	235	270	221	224	192	Predicted protein
Phatr3_J36743	420	398	223	282	305	296	594	555	558	754	723	410	730	775	828	755	783	665	770	856	807	1097	790	874	570	532	566	785	761	742	Predicted protein
Phatr3_J36744	321	258	191	270	222	240	318	308	358	379	387	196	342	263	305	231	245	218	217	193	175	227	192	243	86	135	113	204	178	190	Predicted protein
Phatr3_J46716	382	377	123	387	319	369	167	170	189	203	197	107	272	225	219	224	213	184	216	180	212	233	229	248	167	220	150	220	209	207	Predicted protein
Phatr3_J46717	1	3	0	10	9	2	6	10	1	2	8	7	5	2	6	5	8	5	8	1	1	24	7	11	6	7	4	8	3	11	Predicted protein
Phatr3_J46718	420	468	371	830	616	685	1038	1072	1030	1295	1245	523	148	155	141	34	43	15	146	140	173	26	23	24	557	302	300	11	23	24	NA
Phatr3_J46719	153	113	0	84	110	166	37	13	37	35	67	23	53	69	41	78	48	46	69	65	80	108	95	108	45	53	45	82	54	60	Predicted protein
Phatr3_EG00829	0	1	0	1	1	0	1	0	0	5	0	0	2	0	0	0	0	1	0	0	0	4	2	0	0	1	0	0	6	2	NA
Phatr3_J46720	943	820	496	921	662	862	780	749	644	922	833	342	453	393	353	287	265	267	227	112	136	139	118	163	164	153	97	118	114	96	Predicted protein
Phatr3_J46721	1522	1400	2097	1194	1435	1341	20353	20281	17345	20355	18559	8977	6248	8008	8370	4587	4685	5207	6664	9331	8635	4893	4330	4255	14267	11082	11672	4130	4579	4597	Predicted protein
Phatr3_J52108	624	557	311	664	526	589	725	716	623	721	639	320	264	278	207	147	138	140	106	79	55	19	19	29	141	138	99	21	38	25	NA
Phatr3_J21039	332	283	123	286	247	316	232	233	182	275	230	143	239	240	243	195	149	191	313	299	344	256	177	320	388	469	366	229	172	218	Predicted protein
Phatr3_EG02293	602	571	160	537	467	554	233	191	222	272	243	144	240	231	193	185	136	185	352	261	281	316	332	280	195	163	125	222	261	251	Acetyl-coenzyme A synthetase
Phatr3_J46726	926	922	617	774	682	842	344	358	325	530	513	224	467	488	458	499	486	532	784	584	657	803	816	701	489	424	438	738	730	572	Predicted protein
Phatr3_J46727	1324	1150	533	1033	940	1043	724	644	641	823	759	433	1029	1199	878	1110	1113	1152	1561	1464	1590	2060	1864	1885	1157	1058	1101	1549	1619	1654	Predicted protein
Phatr3_J46728	332	277	138	292	237	299	108	88	100	131	131	72	21	24	15	79	32	43	13	12	10	33	43	62	3	4	5	37	34	30	Predicted protein
Phatr3_J46729	1109	1029	335	1152	768	1018	668	659	540	775	572	262	477	460	395	295	302	351	661	392	469	369	342	404	612	445	401	274	331	266	Predicted protein
Phatr3_J46730	316	294	198	404	256	387	849	740	758	841	769	408	83	104	76	36	54	68	148	119	151	68	77	74	115	98	94	57	44	30	Predicted protein
Phatr3_EG00839	0	0	0	0	0	0	0	0	0	0	0	0	0	0	0	0	0	0	0	0	0	0	0	0	0	0	0	0	0	0	NA
Phatr3_J46732	64	64	71	85	71	67	38	46	46	87	72	36	38	37	40	68	73	66	57	50	72	110	86	60	67	37	39	80	74	71	Predicted protein
Phatr3_J46733	321	274	72	310	268	281	319	300	255	369	353	153	210	164	176	173	191	158	218	155	173	211	209	202	153	148	135	169	202	201	Predicted protein
Phatr3_EG00809	257	239	150	312	216	247	67	82	97	100	114	60	90	67	74	86	78	94	187	176	150	200	188	179	96	69	62	139	167	164	NA
Phatr3_J46734	1235	1322	696	1402	1267	1135	896	981	880	1193	1000	528	863	886	829	662	579	622	997	1045	1077	869	816	874	1247	983	1021	726	757	699	NA
Phatr3_J46735	4378	3887	5688	3050	3216	2987	4759	4391	4716	5875	6001	3407	5043	4758	4666	5078	4258	4589	5302	5677	5601	7596	6625	6489	4868	4196	4215	5596	6611	6508	Predicted protein
Phatr3_J46736	467	491	84	419	419	455	368	368	397	476	489	249	458	507	445	496	514	587	843	772	762	907	787	727	1082	658	728	780	784	765	Predicted protein
Phatr3_J46737	720	644	421	1000	552	835	681	678	639	775	682	299	265	233	262	217	216	196	447	363	415	390	433	322	367	298	294	319	386	298	NA
Phatr3_J46738	516	453	165	503	352	439	337	287	303	425	377	173	331	237	231	266	231	230	235	168	180	238	212	235	159	131	104	231	214	176	Predicted protein
Phatr3_J13445	366	305	368	289	218	271	163	140	136	228	153	100	292	274	213	237	209	209	229	181	227	215	219	229	164	136	146	227	169	208	Predicted protein
Phatr3_J8132	236	236	158	189	201	155	82	50	76	88	75	37	133	127	108	102	87	93	246	255	298	186	190	183	294	224	243	140	186	169	Predicted protein
Phatr3_EG02005	152	165	154	163	216	149	3	2	4	5	1	5	370	420	416	231	264	217	555	573	498	336	294	201	803	581	539	296	293	342	NA
Phatr3_EG02008	94	118	14	94	123	69	1	6	1	6	3	1	172	276	240	173	164	189	226	271	269	226	156	133	621	335	311	167	181	198	NA
Phatr3_J36770	202	193	29	195	167	215	86	78	105	115	112	48	165	187	212	91	87	54	285	322	344	98	107	100	691	461	511	64	91	89	Predicted protein
Phatr3_J36771	22	9	0	8	8	15	2	19	6	7	6	4	8	16	5	6	1	11	15	21	26	23	27	23	17	20	22	19	33	16	Predicted protein
Phatr3_J46740	481	418	211	424	410	417	182	181	192	282	220	120	294	267	232	231	206	186	315	354	310	365	308	349	253	256	261	294	301	301	Predicted protein
Phatr3_J46741	282	251	142	188	243	227	224	250	214	317	258	133	239	327	216	299	338	273	606	620	515	789	606	507	615	367	391	560	554	572	Predicted protein
Phatr3_J46742	310	303	140	606	374	420	706	770	464	677	633	265	169	243	149	35	38	19	201	215	199	11	17	23	895	543	519	14	9	22	Predicted protein
Phatr3_J46743	104	96	57	286	244	271	49	31	32	72	49	35	16	18	19	14	15	8	6	8	10	14	16	5	20	14	12	8	12	13	Predicted protein
Phatr3_J36776	140	169	27	132	93	145	45	44	61	59	63	17	59	62	38	66	58	78	86	48	71	104	96	92	62	43	48	87	61	64	Predicted protein
Phatr3_J28181	164	150	50	153	100	175	137	129	128	169	179	83	100	90	69	113	88	120	138	152	155	167	162	171	73	77	75	150	142	177	Predicted protein
Phatr3_J46746	178	176	74	166	100	139	105	95	100	123	117	72	36	25	31	55	32	25	33	21	33	36	45	46	37	28	17	41	38	15	Predicted protein
Phatr3_J46747	82	95	0	208	129	184	161	171	134	187	196	111	65	65	71	94	101	57	124	116	109	135	136	119	146	128	139	110	118	90	Predicted protein
Phatr3_J52110	105	107	25	112	79	87	12	19	13	20	38	13	7	7	4	16	5	3	5	3	3	12	7	2	2	0	0	4	2	8	Putative uncharacterized protein
Phatr3_J13382	2066	1956	1962	1617	1847	1592	1845	1832	1825	2259	2185	1151	3007	3107	3081	3102	2762	2901	2370	3009	2724	3211	3021	2925	2175	2076	1877	2903	3049	3059	Predicted protein
Phatr3_J46750	972	824	671	792	781	690	516	479	441	586	563	229	639	602	586	558	465	477	565	631	554	536	530	509	506	528	536	476	478	458	Predicted protein
Phatr3_EG00794	272	247	183	293	223	296	223	255	243	256	232	109	119	175	142	99	96	100	179	148	140	155	137	122	199	98	123	97	118	106	NA
Phatr3_J46752	563	478	173	487	327	485	557	619	551	622	585	288	223	247	261	235	202	270	349	317	287	353	287	318	376	215	257	253	213	221	Predicted protein
Phatr3_J46753	332	265	60	329	261	302	341	334	307	452	377	187	250	298	286	230	223	247	303	235	197	213	244	166	300	202	223	199	186	239	Predicted protein
Phatr3_J13424	1030	893	483	689	886	1014	2360	2220	2225	2270	2078	1036	3270	4565	4293	3357	3082	3958	2824	3222	3446	3292	2574	3010	3648	3911	4160	2780	2262	3013	Predicted protein
Phatr3_EG00862	943	783	184	741	634	801	522	503	467	618	550	293	400	482	394	513	456	449	808	684	657	696	747	696	737	680	702	571	593	565	NA
Phatr3_J36789	90	111	64	77	119	68	63	86	86	92	60	40	46	43	28	59	39	42	49	21	37	75	73	79	45	44	42	61	70	57	Predicted protein
Phatr3_J28191	317	340	37	257	134	286	434	472	435	440	501	200	132	147	93	113	123	131	130	81	78	120	75	72	101	72	51	70	74	74	Succinate semialdehyde dehydrogenase	SSD1
Phatr3_EG00865	43	56	98	72	49	47	88	71	34	65	79	17	10	11	5	20	28	11	6	13	2	12	15	9	4	5	4	6	17	9	NA
Phatr3_J46758	525	490	328	408	392	457	559	546	582	532	487	247	532	706	621	269	251	216	457	531	509	280	230	283	809	811	879	222	221	227	Predicted protein
Phatr3_EG00797	521	454	208	437	393	443	331	351	297	508	416	204	280	351	273	311	247	254	318	347	330	350	342	373	338	325	268	299	257	288	NA
Phatr3_J36794	2	2	0	7	5	6	4	4	1	2	5	3	3	6	6	3	5	0	8	3	1	7	8	10	4	4	2	1	9	13	NA
Phatr3_J13428	304	248	54	234	216	278	342	307	277	318	307	145	271	416	290	349	337	325	805	710	634	858	812	751	560	452	492	687	671	705	Anthranilate synthase. anthranilate synthetase. chorismate lyase
Phatr3_J21073	4241	3640	3657	3203	3150	2992	2926	2569	2723	4179	3591	2179	3334	2684	2722	2822	2317	2608	3737	3909	3883	4720	3964	4347	3423	3147	3234	3609	3730	3683	Predicted protein
Phatr3_J13230	103	130	31	117	121	93	95	102	120	105	85	76	88	87	61	68	71	56	169	101	126	135	92	83	148	114	99	109	75	103	Predicted protein
Phatr3_J46762	446	455	80	368	357	375	497	469	445	476	436	309	420	376	382	336	271	305	517	602	606	525	527	488	552	468	505	391	463	413	Predicted protein
Phatr3_J46763	947	862	219	929	764	988	1500	1455	1346	1358	1285	690	536	621	541	450	407	426	940	797	891	730	779	855	583	582	564	606	446	495	Predicted protein
Phatr3_J46764	308	335	82	247	285	265	52	67	71	92	89	51	184	190	196	228	218	216	276	282	248	315	327	313	244	173	195	293	274	256	Predicted protein
Phatr3_J36801	711	505	221	452	507	447	501	479	420	521	603	359	477	636	579	678	642	602	456	514	593	693	674	671	349	420	412	611	604	680	Predicted protein
Phatr3_J46766	877	814	541	674	671	689	534	525	514	684	671	310	927	980	855	923	949	951	885	954	921	1181	1026	1073	1073	977	874	1000	1031	950	Predicted protein
Phatr3_J46767	371	249	159	268	287	294	37	42	56	58	69	41	110	149	130	136	97	123	200	224	192	325	213	219	244	210	200	239	280	303	Predicted protein
Phatr3_J46768	252	171	357	206	234	168	85	114	139	203	146	102	535	676	547	627	551	631	667	769	640	952	792	636	915	678	685	766	842	862	Predicted protein
Phatr3_J28202	1294	1260	2432	1137	1077	981	7402	7612	6156	7561	6773	3291	1528	1872	1926	1203	1149	1262	1113	1448	1262	760	656	773	2120	1794	1896	611	747	630	Proteasome subunit alpha type
Phatr3_J46770	762	726	396	518	504	521	746	727	675	876	905	411	797	1027	992	677	653	716	1469	1608	1511	913	942	851	2707	2196	2064	812	867	736	Predicted protein
Phatr3_EG00841	946	786	196	531	584	629	694	653	702	788	802	505	730	833	699	816	833	886	1176	1246	1199	1301	1225	1332	964	767	839	1151	971	1107	NA
Phatr3_J36808	454	311	270	309	324	264	394	338	323	373	392	214	382	478	425	386	390	394	629	563	529	540	580	560	544	430	437	501	484	486	Predicted protein
Phatr3_J13233	747	612	158	535	442	561	585	637	627	887	844	442	608	641	568	509	471	560	984	1055	951	1153	1019	912	1221	903	920	901	988	951	Predicted protein
Phatr3_J54642	4055	3673	4140	3894	3563	3850	23259	23008	18277	21114	18881	8214	4709	6465	5971	4159	4072	4476	4079	4866	4748	2775	2912	2787	6614	6058	6468	2461	2599	2441	Predicted protein	HCDC48
Phatr3_J46775	283	234	105	430	226	369	798	696	652	711	665	293	42	67	50	20	38	34	3	15	17	9	4	15	32	21	24	5	17	10	Predicted protein
Phatr3_EG00849	378	404	326	537	338	432	558	542	557	608	562	221	120	120	92	73	58	46	44	49	33	30	40	51	59	64	77	34	33	32	NA
Phatr3_EG00795	17	13	0	3	13	7	4	0	2	6	3	0	5	2	2	3	5	7	7	8	8	8	9	8	13	6	12	6	4	5	NA
Phatr3_J46777	206	139	42	130	121	163	87	104	84	110	130	77	98	126	112	79	83	63	149	134	136	156	139	159	98	106	99	137	126	150	Predicted protein
Phatr3_J54643	270	235	165	261	226	222	274	271	240	370	292	144	171	216	210	194	214	173	254	204	272	254	254	247	194	146	141	218	226	270	Predicted protein
Phatr3_J46779	1069	1008	141	834	660	866	1866	1893	1615	2074	1965	946	593	655	571	816	808	855	546	467	427	762	699	647	375	179	203	655	605	621	Predicted protein
Phatr3_J46780	1072	871	702	1021	878	998	914	965	905	1067	818	466	324	342	307	286	238	241	176	129	128	55	71	95	211	217	174	62	71	65	Predicted protein
Phatr3_EG00786	1161	948	437	951	896	1018	610	606	566	728	621	294	1026	1353	1260	1117	1097	1196	1253	1349	1363	1444	1203	1327	1250	1218	1228	1112	1087	1241	NA
Phatr3_EG00848	0	0	0	0	0	0	0	0	0	0	0	0	0	0	0	0	0	0	0	0	0	0	0	0	0	0	0	0	0	0	NA
Phatr3_J13261	223	231	165	180	193	183	113	96	80	133	135	84	193	192	167	184	162	173	191	131	162	172	178	174	91	131	106	124	146	154	Predicted protein
Phatr3_J46782	304	276	266	244	285	246	361	318	252	401	361	197	381	388	383	327	409	376	562	476	457	583	560	478	488	297	376	401	402	445	Predicted protein
Phatr3_J46783	2001	1788	746	1595	1575	1524	947	1068	1036	1319	1266	661	1320	1655	1595	1597	1614	1731	2209	2139	1956	2514	2230	2091	1988	1327	1395	2073	1882	1934	Predicted protein
Phatr3_J36821	177	119	38	114	174	140	449	517	373	549	485	253	504	769	709	745	757	693	862	879	824	1036	947	883	1113	985	933	881	906	897	Glycerol-3-phosphate dehydrogenase [NAD(+)]
Phatr3_EG00810	1558	1020	1901	1425	1234	1158	695	485	308	670	646	373	1115	1152	1065	1036	915	699	893	960	1043	1037	943	923	627	939	823	848	903	863	NA
Phatr3_J46785	420	403	434	454	382	399	269	219	215	351	326	141	494	428	497	348	353	348	89	69	74	98	95	102	52	113	78	96	86	64	UDP-glucose 4-epimerase	GALE1
Phatr3_J28215	465	485	241	424	437	450	447	462	424	543	455	235	323	278	300	252	220	252	223	237	233	234	212	256	228	224	220	214	223	186	NA
Phatr3_J13402	248	279	234	233	262	279	533	617	461	634	575	325	330	302	333	240	200	225	288	333	273	242	219	171	343	300	308	188	236	196	Predicted protein
Phatr3_J28219	1054	876	403	785	721	830	5307	5514	4670	4864	4354	2117	1649	2219	2177	1497	1320	1428	1114	1495	1431	928	813	1017	2125	2134	2113	917	757	857	Predicted protein
Phatr3_J13281	209	195	69	106	196	141	245	187	261	318	366	214	470	562	520	476	503	494	864	936	828	1070	1007	864	502	472	527	846	820	814	60S ribosome subunit biogenesis protein NIP7 homolog
Phatr3_J36828	160	180	78	178	214	150	234	265	163	202	180	81	19	21	20	32	23	9	31	19	27	34	39	33	3	9	14	17	19	24	Predicted protein
Phatr3_J28222	983	983	1482	1004	876	948	8329	8444	5847	7193	6334	2552	934	1153	1214	638	642	742	469	614	529	185	155	245	638	678	721	173	161	128	Transaldolase
Phatr3_J36830	306	227	86	195	218	218	225	218	239	274	223	125	224	241	172	184	166	159	215	264	273	258	236	256	241	257	305	193	177	225	Predicted protein
Phatr3_J46790	1058	986	498	1021	934	958	725	676	674	769	729	363	663	576	501	592	458	498	708	631	757	684	732	797	677	726	756	568	592	621	Predicted protein
Phatr3_J8230	2460	2270	1620	2371	2033	2129	2116	2085	1864	2302	2103	1157	1848	1958	1920	1737	1646	1686	1923	1921	1932	2108	1866	1973	1429	1383	1327	1603	1847	1714	Predicted protein
Phatr3_J46792	663	584	490	667	527	509	1601	1674	1287	1398	1272	671	600	884	760	441	460	526	299	365	337	156	138	191	615	548	593	176	162	133	Predicted protein
Phatr3_J46793	340	309	77	404	317	319	171	153	188	206	198	122	101	103	66	50	43	41	70	36	45	40	48	42	34	37	35	32	49	56	Predicted protein
Phatr3_J46794	170	190	28	163	139	146	159	152	166	167	162	101	175	176	138	124	123	143	268	264	242	310	289	237	161	145	166	263	276	270	Nucleotide transporter 4	NTT4
Phatr3_J46795	501	475	737	473	469	427	565	565	590	704	648	339	625	710	643	599	520	628	655	632	665	624	603	521	843	604	659	530	537	511	Predicted protein
Phatr3_EG00807	0	0	0	0	0	0	0	0	0	0	0	0	0	0	0	0	0	0	0	0	0	0	0	0	0	0	0	0	0	0	NA
Phatr3_J46796	1392	1101	454	1044	1043	941	2316	2576	2556	3329	3138	1548	2371	2587	2333	2708	2880	3227	4082	4173	3958	4413	3691	3543	5016	3340	3822	3800	3687	3634	Predicted protein
Phatr3_J46797	460	423	270	366	346	380	506	521	447	551	521	274	440	498	416	373	376	382	358	440	451	481	421	362	500	426	410	385	394	392	Predicted protein
Phatr3_EG00835	231	228	41	228	223	213	220	189	184	210	204	118	232	240	205	197	182	141	302	312	314	245	301	264	356	320	301	215	248	266	NA
Phatr3_EG02009	82	74	12	80	68	64	83	96	81	88	81	47	80	63	63	48	60	49	64	71	62	86	50	55	75	71	63	60	55	64	Putative uncharacterized protein
Phatr3_EG02007	650	532	489	562	582	572	313	285	229	315	375	150	526	577	592	511	440	384	330	300	364	320	340	311	189	269	257	309	311	312	NA
Phatr3_J36840	72	116	43	179	71	127	139	134	120	149	137	50	11	14	26	4	12	9	8	11	14	5	15	8	19	15	9	4	9	7	Predicted protein
Phatr3_J13360	384	343	463	357	343	281	369	387	310	386	418	207	371	328	320	268	279	204	293	338	287	252	257	301	305	253	310	217	248	213	Predicted protein
Phatr3_EG00808	149	132	149	166	128	162	56	54	46	88	74	20	0	1	0	2	0	0	0	2	0	0	1	0	0	0	0	0	0	0	NA
Phatr3_EG00825	0	0	0	0	0	0	0	0	0	0	0	0	0	0	0	0	0	0	0	0	0	0	0	0	0	0	0	0	0	0	NA
Phatr3_J13538	377	300	353	344	277	286	753	834	748	982	759	415	176	189	177	249	257	263	167	143	154	370	296	312	32	86	57	248	205	259	Predicted protein
Phatr3_J36842	580	531	293	607	491	528	687	785	666	868	794	329	124	153	160	159	216	163	122	97	98	200	205	157	141	73	84	191	202	172	NA
Phatr3_EG00856	176	132	32	180	179	210	1439	1859	1563	1726	1593	872	289	446	363	379	549	484	154	279	213	174	168	128	581	271	340	180	161	168	NA
Phatr3_J36843	263	268	44	532	436	521	1199	1161	894	1448	1303	592	385	589	486	437	663	589	330	424	364	259	178	161	745	597	626	217	260	207	Predicted protein
Phatr3_J36844	285	266	72	354	242	299	827	795	683	914	781	376	2	6	8	45	14	28	2	0	2	6	1	5	4	3	2	5	6	0	Predicted protein
Phatr3_J46802	658	539	272	557	487	499	1407	1384	1188	1390	1192	549	707	837	754	732	593	653	556	678	632	555	568	531	817	777	718	572	583	575	Palmitoyltransferase
Phatr3_J36846	680	632	231	600	534	612	676	659	641	634	564	293	425	522	511	326	304	261	455	482	547	413	410	391	651	620	531	375	361	355	Predicted protein
Phatr3_J36847	101	109	31	76	69	79	64	65	84	82	88	31	90	88	101	79	58	85	121	145	92	135	90	109	131	88	112	91	98	80	Predicted protein
Phatr3_J36848	1170	1026	840	1131	1033	1131	991	981	869	1078	1000	422	804	827	846	680	560	667	622	513	548	543	545	568	521	493	435	427	495	430	Predicted protein
Phatr3_EG00813	0	0	0	0	0	0	0	0	0	0	0	0	0	0	0	0	0	0	0	0	0	0	0	0	0	0	0	0	0	0	NA
Phatr3_EG00798	22	11	0	10	5	27	23	11	23	21	13	4	17	15	21	24	7	20	12	8	14	6	5	21	11	8	10	4	7	8	NA
Phatr3_J46805	269	219	237	262	248	265	427	492	382	419	320	177	222	262	298	246	201	191	326	337	332	231	245	230	616	329	403	214	224	200	Predicted protein
Phatr3_EG00811	124	134	90	111	97	136	141	127	121	142	145	80	189	225	228	212	186	192	331	375	358	375	342	315	283	229	299	262	295	284	NA
Phatr3_J46806	436	322	242	279	284	316	49	40	42	73	69	31	172	136	143	185	111	149	350	289	337	465	418	451	192	204	197	329	318	339	Predicted protein
Phatr3_J28234	9611	8991	9243	7693	7595	7557	8070	7339	8943	11391	10551	6431	10551	9182	8714	9825	8332	8791	11779	13475	12705	16800	14484	13930	12894	10583	10379	11935	13502	13097	Predicted protein	RPL2
Phatr3_J46808	387	357	233	436	352	421	633	818	674	1044	1039	585	333	458	394	336	339	304	269	383	392	280	238	322	515	455	471	292	295	274	Predicted protein
Phatr3_EG00800	42	18	0	8	8	24	26	32	25	37	15	15	17	6	2	13	5	23	7	8	20	18	20	12	7	13	10	21	8	22	NA
Phatr3_EG00805	843	603	77	409	342	521	507	577	483	786	727	395	223	210	155	253	223	236	501	272	307	483	480	401	262	97	112	395	301	295	NA
Phatr3_J28237	525	396	25	246	301	355	101	94	75	119	154	57	211	218	153	204	188	173	453	329	372	507	465	491	297	242	254	398	415	330	Predicted protein	SMC6
Phatr3_EG00853	71	79	214	59	50	40	24	10	12	12	10	5	21	38	30	37	31	21	87	64	67	73	83	56	13	35	34	55	86	59	NA
Phatr3_J51005	793	672	590	627	683	642	256	219	211	361	380	204	482	504	385	615	551	537	1104	911	973	1469	1252	1279	569	416	468	1128	1086	1027	DNA ligase
Phatr3_EG00802	0	0	0	0	0	0	0	0	0	0	0	0	0	0	0	0	0	0	0	0	0	0	0	0	0	0	0	0	0	0	NA
Phatr3_J21116	603	527	113	353	507	516	717	613	834	953	830	448	1056	1149	900	1177	1045	1351	1171	1224	1475	2056	1647	2291	690	891	1002	1703	1410	1552	Predicted protein
Phatr3_J46813	93	94	43	136	168	171	71	76	64	87	64	23	125	132	118	78	28	59	118	88	95	33	47	32	210	197	197	57	34	38	Predicted protein
Phatr3_J13534	187	169	92	168	174	135	233	217	234	277	315	150	302	319	303	295	320	354	483	525	398	662	595	455	387	286	305	485	484	522	Predicted protein
Phatr3_J51007	269	199	101	203	222	211	401	385	306	425	440	253	564	530	626	641	610	642	1121	1234	1086	1426	1260	973	905	670	695	958	1140	1111	Predicted protein
Phatr3_J46816	1472	1239	819	1390	1238	1217	1073	1020	866	1199	1074	576	1483	1544	1559	1483	1252	1186	1532	1602	1454	1555	1524	1223	1624	1498	1440	1336	1535	1590	Predicted protein
Phatr3_J46817	377	358	232	357	352	252	424	464	385	530	473	216	271	299	313	259	233	269	311	301	287	291	255	262	305	224	220	271	281	255	Predicted protein
Phatr3_J46818	422	386	230	390	278	374	245	241	257	287	275	139	225	217	223	189	170	191	275	251	283	271	270	268	192	191	186	210	205	215	Predicted protein
Phatr3_J46819	297	301	206	398	265	295	130	141	127	214	180	106	70	56	80	51	54	41	92	59	75	54	35	70	105	56	78	35	37	52	Predicted protein
Phatr3_J28245	248	266	268	390	270	424	149	155	162	241	219	111	30	16	10	15	17	4	7	5	5	2	4	4	4	10	0	4	1	6	Chloride channel protein
Phatr3_J46821	14	6	9	7	10	15	9	8	5	6	14	5	15	8	10	5	10	15	20	15	12	43	29	25	8	9	7	7	17	14	Predicted protein
Phatr3_J46822	40	27	35	39	50	36	17	13	14	18	13	9	18	8	4	13	8	7	28	12	31	79	38	23	27	23	18	30	33	25	Predicted protein
Phatr3_EG00804	1	0	0	1	0	0	1	0	0	0	0	0	0	0	0	0	0	0	0	0	0	4	1	0	0	0	0	0	0	0	NA
Phatr3_J46823	326	304	103	270	222	273	235	228	203	314	300	140	258	253	211	226	178	202	418	412	311	385	358	345	543	384	355	295	348	350	Predicted protein
Phatr3_J1155	310	288	200	421	309	309	437	387	383	615	546	274	452	458	390	348	379	383	246	174	230	191	169	225	430	358	385	235	299	194	Predicted protein
Phatr3_EG00799	0	0	0	0	0	0	0	0	0	0	0	0	0	0	0	0	0	0	0	0	0	0	0	0	0	0	0	0	0	0	NA
Phatr3_J46825	6157	5500	3802	4621	5725	4777	4828	4841	4801	6037	5529	2811	19084	20782	20092	16991	17190	16107	12072	14714	13893	13394	11350	11295	21748	20567	18040	12291	14634	15085	Predicted protein
Phatr3_J21122	2073	1826	19	959	992	1459	716	833	935	1071	1053	620	1465	1313	1100	1608	1343	1645	890	962	1095	1643	1219	1919	624	705	679	1360	1193	1504	Predicted protein
Phatr3_EG00821	0	0	0	0	0	0	0	0	0	0	0	0	0	0	0	0	0	0	0	0	0	0	0	0	0	0	0	0	0	0	NA
Phatr3_J46827	302	334	92	268	299	330	170	170	144	231	244	106	207	206	182	159	158	166	364	334	396	378	389	302	346	308	272	235	289	304	Predicted protein
Phatr3_J46830	884	849	51	626	704	953	918	1048	1085	992	1004	533	692	893	680	847	709	865	727	931	884	1079	849	1174	989	932	1114	915	801	954	Delta 5 fatty acid desaturase	PTD5A
Phatr3_EG00852	0	0	0	0	0	0	0	0	0	0	0	0	0	0	0	0	0	0	0	0	0	0	0	0	0	0	0	0	0	0	NA
Phatr3_EG00818	28	47	0	38	23	40	109	138	105	149	139	105	56	75	62	58	54	41	44	103	57	41	40	39	197	146	121	42	47	30	NA
Phatr3_J13232	6	2	0	15	3	12	11	9	7	17	15	5	6	7	8	10	0	3	5	5	9	5	11	6	8	10	9	10	8	3	Predicted protein
Phatr3_J36877	93	111	36	84	69	97	50	50	36	37	51	10	118	107	76	59	39	65	185	207	187	156	158	130	195	149	173	156	106	143	Predicted protein
Phatr3_J46833	176	178	81	186	158	143	278	292	230	377	353	140	136	137	136	109	103	95	119	95	97	124	100	102	77	81	112	91	105	79	NA
Phatr3_J46834	1273	1260	343	1121	1142	1170	667	610	578	872	712	390	995	831	788	964	812	818	1128	916	988	1347	1344	1354	562	506	520	1212	1222	1170	Predicted protein
Phatr3_EG00828	48	35	31	36	37	47	8	13	13	26	18	6	34	18	21	17	13	13	43	16	35	21	18	24	18	33	19	16	18	13	NA
Phatr3_J36880	150	141	123	143	125	114	95	106	97	137	157	78	173	188	158	163	122	176	187	196	214	257	187	272	200	190	161	207	152	183	Predicted protein
Phatr3_J36881	422	412	148	388	380	338	332	298	329	402	368	210	312	246	238	272	227	248	262	282	247	245	290	228	230	223	221	181	208	178	2-deoxy-D-gluconate 3-dehydrogenase
Phatr3_J13386	230	242	195	207	208	213	193	155	165	217	227	105	206	235	192	151	159	124	245	252	222	233	192	187	188	114	138	172	169	175	Spermine/spermidine synthase
Phatr3_EG00815	259	212	193	214	188	181	17	19	19	34	22	20	77	51	85	42	40	34	125	71	74	101	92	85	32	58	39	77	65	51	NA
Phatr3_J46837	507	455	263	345	401	420	387	387	382	557	537	266	535	638	538	746	688	731	2087	1812	1654	2468	2297	1854	1401	962	985	1917	1847	1788	Predicted protein
Phatr3_J46838	505	441	193	325	295	352	47	43	39	36	59	17	139	111	106	143	81	68	342	214	254	364	323	325	222	183	208	305	320	311	Predicted protein
Phatr3_J13309	159	113	110	71	97	90	128	139	113	158	154	88	218	298	253	217	204	213	396	419	364	387	370	317	363	263	269	359	336	398	Predicted protein
Phatr3_EG00812	291	252	144	231	227	211	157	137	149	179	193	98	159	196	153	209	152	191	229	297	267	252	224	264	262	263	277	194	185	201	NA
Phatr3_J21135	648	600	993	547	586	566	827	744	641	971	817	480	671	821	821	615	520	539	782	879	791	685	581	596	963	898	843	532	537	547	Predicted protein
Phatr3_EG02001	0	0	0	0	0	3	6	0	0	5	4	1	3	2	2	6	1	1	1	0	4	0	0	0	3	1	1	0	1	6	NA
Phatr3_EG02002	262	244	99	287	268	334	617	775	634	765	687	411	269	393	361	338	408	370	217	328	246	225	207	255	421	306	303	208	248	235	Predicted protein
Phatr3_J46842	304	274	128	275	248	252	170	182	153	122	154	88	110	160	144	142	139	151	123	93	84	115	112	129	100	100	82	111	132	119	Predicted protein
Phatr3_J46843	627	603	466	664	519	701	611	574	585	566	539	262	297	463	378	195	250	258	122	138	119	43	57	55	300	246	244	45	61	50	Predicted protein
Phatr3_J54656	616	589	1011	1197	805	1008	10555	10482	8315	8237	7414	4315	1832	3572	3623	2401	3214	2883	567	2684	1738	948	1039	951	3886	1751	2527	1118	1144	808	HSP20	HSP20
Phatr3_J7553	217	178	359	193	170	167	110	128	95	157	131	89	194	223	187	171	181	217	193	189	189	188	204	156	183	147	150	160	157	166	Predicted protein
Phatr3_J36891	505	465	219	587	454	618	1022	1143	960	1447	1420	874	468	633	522	687	868	794	461	493	466	514	471	447	789	512	531	485	449	407	NF-X1-like transcription factor	NLTF
PTsRNA00020a	0	0	0	0	0	0	0	0	0	0	0	0	0	0	0	0	0	0	0	0	0	0	0	0	0	0	0	0	0	0	NA
Phatr3_J36892	366	407	264	503	497	481	389	439	447	465	434	324	316	392	329	226	344	333	200	268	234	214	212	173	387	287	265	197	194	169	Predicted protein	CYCH1
Phatr3_J46846	164	159	98	112	177	145	228	223	253	428	430	193	534	717	599	627	634	742	1136	1102	1058	1592	1463	1218	621	516	485	1101	1185	1007	Predicted protein
Phatr3_J46847	279	288	267	246	229	229	327	274	226	350	301	149	418	446	480	499	482	386	499	423	380	725	650	523	293	315	249	474	612	534	Predicted protein
Phatr3_J46848	173	145	80	140	141	141	201	209	185	235	271	134	290	346	323	359	312	310	746	798	682	1051	885	688	471	469	454	709	742	778	Predicted protein
Phatr3_J54658	41	31	16	99	42	82	34	26	34	98	86	61	35	30	36	92	97	41	38	21	18	91	73	43	34	16	25	30	58	42	Predicted protein
Phatr3_J36897	117	146	62	126	137	110	202	221	146	304	253	129	306	353	333	300	297	301	462	507	487	592	544	517	371	300	350	410	455	451	Predicted protein
Phatr3_J46850	521	507	205	483	524	484	219	181	190	315	274	138	1051	1343	1148	866	733	776	2225	2531	2222	1214	1113	990	2824	2706	2687	982	1000	1011	Predicted protein
Phatr3_J36899	160	158	143	166	195	200	181	160	203	220	186	88	141	118	174	143	140	129	131	124	126	144	153	130	75	89	67	153	160	145	Predicted protein
Phatr3_J46851	157	146	97	236	182	153	208	169	116	259	171	87	177	204	147	141	145	126	155	144	168	80	127	129	277	235	222	109	117	103	Predicted protein
Phatr3_J46852	464	385	444	478	582	475	16	24	27	20	24	18	439	458	450	208	218	157	522	592	544	219	191	150	1090	792	808	198	230	184	Predicted protein
Phatr3_J46853	454	479	121	414	310	426	208	154	192	234	210	112	341	323	285	273	219	241	564	534	524	536	505	500	549	382	444	422	451	418	Predicted protein
Phatr3_J36903	219	235	424	226	268	167	649	607	331	636	603	263	187	223	209	121	128	107	141	165	143	104	112	95	138	134	154	86	82	82	Predicted protein
Phatr3_J46854	211	173	116	207	216	170	81	80	103	105	87	59	50	45	39	38	46	41	70	37	59	51	36	49	52	41	44	48	48	34	Predicted protein
Phatr3_J46855	382	305	117	327	313	331	238	241	219	274	247	104	173	143	218	169	136	144	223	202	215	225	166	225	224	167	146	180	151	166	Predicted protein
Phatr3_J36906	427	384	352	329	348	379	337	295	265	411	374	166	407	373	296	327	310	339	336	433	409	459	405	429	407	350	350	373	349	355	Predicted protein
Phatr3_EG02006	396	341	77	286	222	310	63	43	48	69	70	33	143	113	81	79	59	60	259	160	176	254	257	306	95	128	133	211	217	196	Predicted protein
Phatr3_EG02003	0	1	0	0	0	0	0	0	0	0	0	0	0	0	2	0	0	0	0	0	1	1	0	0	0	0	0	0	0	0	NA
Phatr3_J21147	227	155	0	159	117	209	218	201	184	242	221	100	196	170	186	158	166	121	158	140	160	132	108	117	149	145	160	123	91	115	NA
Phatr3_EG00833	173	148	216	182	130	154	148	135	113	159	119	54	91	113	129	102	97	60	128	92	113	103	115	67	85	93	100	89	84	91	NA
Phatr3_J46858	1382	1220	924	1328	1077	1078	562	464	483	620	510	284	700	576	649	586	483	408	663	646	670	696	655	646	684	891	730	489	690	614	Predicted protein
Phatr3_J13361	1318	1147	1763	1065	1117	1063	1052	804	787	1014	1001	518	1412	1452	1223	1364	1096	975	1983	2029	2055	2666	2556	2398	1093	1560	1562	1869	1972	2293	Predicted protein
Phatr3_EG00860	0	0	0	0	0	0	0	0	0	0	0	0	0	0	0	0	0	0	0	0	0	0	0	0	0	0	0	0	0	0	NA
Phatr3_J13322	743	719	377	543	553	525	3741	4079	3833	4166	3690	1955	3079	4051	3603	3427	3399	3691	1313	1723	1529	1670	1517	1442	2457	2022	2005	1660	1770	1624	Predicted protein
Phatr3_J13459	621	661	201	543	502	524	594	666	569	728	670	324	567	696	571	551	479	596	448	437	402	464	406	374	632	458	438	430	425	410	Predicted protein	SYTB
Phatr3_J36913	1353	1354	1413	1127	1273	1231	3396	3444	3486	5192	5108	3076	1056	1246	1105	2061	1795	2129	796	869	801	1724	1576	1476	277	256	279	1240	1067	1196	Predicted protein
Phatr3_J46862	548	521	254	466	495	477	696	660	717	705	645	381	580	553	521	486	456	467	577	590	594	593	547	536	562	451	506	485	467	505	NA
Phatr3_J36915	123	145	18	160	166	149	328	355	364	307	320	156	168	132	203	135	132	151	215	236	227	240	203	201	160	161	170	171	137	146	Predicted protein
Phatr3_J46863	690	519	336	539	424	570	436	441	394	588	568	213	377	339	341	378	338	335	614	436	430	654	563	504	460	309	292	495	493	430	Predicted protein
Phatr3_EG00842	0	0	0	0	0	0	0	0	0	0	0	0	0	0	0	0	0	0	0	0	0	0	0	0	0	0	0	0	0	0	NA
Phatr3_J46865	104	110	42	114	109	98	35	25	28	29	31	15	51	57	47	31	19	30	49	40	48	48	51	50	29	36	31	64	34	57	Predicted protein
Phatr3_J46866	417	386	143	443	303	453	410	399	343	457	425	182	227	326	264	275	268	244	364	387	335	381	353	349	479	392	340	351	319	343	Predicted protein
Phatr3_J46867	585	533	94	1017	1082	926	1073	1479	1289	3304	3907	1618	342	433	421	616	821	672	506	594	497	651	617	528	637	357	384	656	745	659	Predicted protein
Phatr3_J13294	105	113	17	100	108	93	119	147	76	113	99	49	116	175	143	90	92	119	190	175	168	160	124	159	202	130	157	125	121	126	Predicted protein
Phatr3_J36922	530	412	74	370	294	340	205	194	235	290	255	119	269	258	218	221	274	232	407	326	336	381	378	379	269	204	239	375	354	310	Predicted protein
Phatr3_J46869	948	828	953	973	917	956	294	261	366	338	332	178	392	377	289	346	245	268	462	470	421	465	482	440	473	457	469	371	446	450	Predicted protein
Phatr3_EG00834	0	0	0	0	0	0	0	0	0	0	0	0	0	0	0	0	0	0	0	0	0	0	0	0	0	0	0	0	0	0	NA
Phatr3_J46871	621	594	348	581	508	629	513	493	433	638	567	283	814	770	662	628	579	661	524	659	687	660	605	663	820	803	818	586	616	531	Ribulose-1, 5-bisphosphate carboxylase/oxygenase small subunit N-methyltransferase I	RBCMT
Phatr3_J46872	2467	2288	368	1369	1160	1596	2888	2983	2813	2054	1823	916	2878	2886	2626	1826	1716	1910	2760	2594	2881	2128	1546	2231	3309	2647	2734	1925	1587	1834	Predicted protein
Phatr3_J36927	254	240	186	181	199	204	255	218	130	303	302	142	341	393	297	346	294	385	553	486	552	687	573	556	389	429	374	543	491	481	Predicted protein
Phatr3_EG00854	38	30	84	29	41	39	23	17	17	21	14	13	31	36	15	17	18	8	24	35	50	21	18	18	32	30	34	10	29	9	NA
Phatr3_J36928	121	144	23	154	133	121	97	116	108	95	69	39	112	105	104	66	52	46	88	115	111	71	55	82	163	146	117	54	58	64	Predicted protein
Phatr3_J13240	277	265	134	289	205	278	71	72	62	86	79	34	185	218	159	91	83	86	228	194	226	85	95	147	332	359	334	131	103	142	Predicted protein
Phatr3_J28285	388	298	91	293	279	332	299	276	198	405	376	158	401	380	288	334	359	327	567	564	616	736	677	614	492	422	405	539	510	553	NA
Phatr3_J46877	357	352	125	284	293	330	283	257	207	332	311	151	175	141	129	161	118	162	74	47	69	115	137	119	6	13	21	97	109	95	Predicted protein
Phatr3_J36932	874	897	139	812	590	804	286	189	262	522	508	268	17	4	8	149	85	136	0	1	1	6	2	4	22	18	16	7	1	1	NA
Phatr3_J46878	515	505	394	664	477	580	82	59	93	110	104	69	410	300	305	257	206	150	122	103	91	132	109	125	66	119	70	97	119	113	Predicted protein
[truncated: 10,395 more rows]

## Sheet: 4. RNA-seq-Normalized data
Supplementary Data 4. Normalized read counts of genes in the RNA-Seq of P. tricornutum wild type and the aureo1c-1 mutant under various light conditions.
Gene ID	WT-GL-1	WT-GL-2	WT-GL-3	aureo1c-1-GL-1	aureo1c-1-GL-2	aureo1c-1-GL-3	WT-HRL-1	WT-HRL-2	WT-HRL-3	aureo1c-1-HRL-1	aureo1c-1-HRL-2	aureo1c-1-HRL-3	WT-HWL-1	WT-HWL-2	WT-HWL-3	aureo1c-1-HWL-1	aureo1c-1-HWL-2	aureo1c-1-HWL-3	WT-HBL1-1	WT-HBL1-2	WT-HBL1-3	aureo1c-1-HBL1-1	aureo1c-1-HBL1-2	aureo1c-1-HBL1-3	WT-HBL2-1	WT-HBL2-2	WT-HBL2-3	aureo1c-1-HBL2-1	aureo1c-1-HBL2-2	aureo1c-1-HBL2-3	Annotation	Gene name
Phatr3_J31400	0	4.03269	0	12.5941	4.62132	1.71352	0.983796	3.06408	0	0.834899	2.68418	1.75977	0.982134	0	0	4.2039	0	6.78137	0	0.911369	6.336	7.49923	2.69845	0	4.45561	3.13734	0	0	0.973426	1.01186	NA
Phatr3_J42422	72.1643	62.91	90.9487	113.347	73.0169	82.2491	91.4931	76.6019	53.1087	56.7732	62.6309	49.2737	39.2854	36.1872	19.9521	19.9685	11.4121	36.1673	14.8463	21.8729	20.8183	19.998	13.4922	23.4074	17.8224	27.1903	29.2603	10.933	11.6811	7.08301	Predicted protein
Phatr3_J31402	0	0	0	0	0	0	0	0	0	0	0	0	0	0	0	0	0	0	0	0	0	0	0	0	0	0	0	0	0	0	Predicted protein
Phatr3_J42423	36.0821	32.2615	23.5212	26.0278	23.1066	20.5623	43.287	28.5981	35.7671	47.5893	32.2102	33.4357	41.2496	36.1872	19.9521	26.2744	29.6714	18.0836	34.0591	47.3912	54.3086	54.9944	39.5773	48.6153	49.0117	53.3348	41.8004	35.7807	39.9105	41.4862	Predicted protein	DSCYC9
Phatr3_J42424	536.077	501.667	443.767	604.516	507.421	544.044	541.088	542.342	546.261	513.463	515.363	461.061	446.871	409.487	422.145	411.982	345.786	354.892	405.216	383.687	333.093	309.135	299.528	318.701	446.452	461.189	423.229	307.118	301.762	312.664	Predicted protein
Phatr3_J7430	142.119	158.888	50.1786	175.477	166.368	180.777	179.051	186.909	199.429	214.569	186.998	154.86	116.874	179.032	191.121	132.423	143.792	170.664	147.589	131.237	119.479	154.151	154.711	159.35	241.494	158.959	147.347	146.105	142.12	158.862	NA
Phatr3_J42426	1696.6	1503.39	1219.97	1500.37	1420.59	1463.35	4137.85	4457.21	3972.32	3239.41	3183.44	3044.41	2431.76	3110.2	3220.7	2974.26	2946.6	3351.13	1098.62	1199.36	1186.64	1196.54	1333.03	1372.93	1332.23	1353.24	1423.3	1441.17	1310.23	1416.6	Predicted protein
Phatr3_EG02408	920.463	890.419	1114.91	836.247	1073.07	886.748	133.796	194.058	144.152	244.626	193.261	253.408	2988.63	3317.8	3361.41	4129.28	4103.79	4109.51	1533.53	1834.59	1839.25	2019.79	1977.96	1931.11	2557.52	2407.39	2497.58	2265.12	2418.96	2578.22	Predicted protein
Phatr3_J31409	1983.78	1881.65	3752.42	1819.42	2056.49	1738.37	169.213	126.649	275.298	261.324	294.365	355.474	3018.1	2718.8	3088.38	4841.84	5144.57	5101.85	1638.33	1756.21	1784.04	3274.67	3134.7	2893.51	1286.78	1418.08	1374.19	3253.07	3801.23	3818.75	Predicted protein
Phatr3_J42428	307.803	293.58	435.926	260.278	324.417	320.429	363.021	481.06	446.547	407.431	409.785	422.346	622.673	651.37	750.831	834.474	822.812	865.755	468.967	600.592	566.62	659.933	617.045	632.9	480.315	494.654	528.775	710.645	647.328	725.503	Predicted protein
Phatr3_J42429	748.888	725.885	627.232	753.965	733.866	762.518	701.447	735.378	841.069	671.259	730.097	767.262	870.171	928.488	920.949	956.387	939.215	965.215	844.49	925.04	934.108	1093.22	1058.69	938.996	908.053	895.188	857.954	940.238	1040.59	1125.19	Predicted protein
Phatr3_EG01843	246.684	225.024	330.865	281.268	278.204	269.88	200.694	208.357	185.339	239.616	204.893	193.575	84.4635	54.2809	63.0068	65.1604	55.9192	48.5998	38.4256	15.4933	17.1977	21.6645	28.7835	50.4159	15.1491	24.053	30.3053	28.8234	23.3622	25.2965	NA
Phatr3_J42431	86.8917	90.3323	53.3147	83.1209	78.5625	85.6761	185.938	183.845	204.848	184.513	169.103	190.056	121.785	121.894	134.414	125.066	101.568	75.7253	161.562	185.008	139.392	106.656	119.631	162.951	205.849	171.508	150.482	88.4579	134.333	146.719	Predicted protein
Phatr3_J42432	125.183	97.5912	185.033	155.327	157.125	133.655	180.035	245.126	207.016	180.338	187.893	204.134	209.195	264.738	214.223	168.156	181.452	188.748	223.567	279.79	243.484	197.48	209.58	237.675	367.142	414.129	372.024	205.739	197.605	196.301	Predicted protein
Phatr3_J4937	1536.8	1492.1	2380.35	1298.87	1468.66	1436.79	1849.54	2175.49	2018.13	1690.67	1752.77	1780.89	1605.79	1718.89	1631.88	1621.65	1598.83	1832.1	1791.16	1737.98	1887.22	1883.14	1905.11	1788.86	1813.43	1901.23	1909.23	1784.07	1995.52	1939.73	Predicted protein
Phatr3_J42434	1254.04	1174.32	2124.75	999.97	1110.97	1035.82	1345.83	1328.79	1103.36	1047.8	987.779	943.239	1258.11	1430.35	1428.15	1388.34	1229.08	1193.52	1397.3	1355.21	1460.9	1508.18	1540.81	1555.69	1119.25	1390.89	1425.39	1478.94	1450.4	1522.85	Predicted protein
Phatr3_J9344	654.633	594.419	1215.26	432.397	577.665	525.195	11.8056	15.3204	3.25156	40.9101	42.9469	86.2289	296.605	232.36	211.073	397.269	424.53	331.157	737.073	647.072	655.324	1023.23	1085.68	883.179	229.018	265.628	306.188	891.537	890.684	815.558	NA
Phatr3_J8866	599.405	590.386	244.621	502.084	542.543	512.343	438.773	450.419	496.404	426.634	468.837	420.586	547.049	600.899	543.959	540.201	635.653	517.644	896.889	763.728	756.7	915.74	853.61	893.982	582.794	564.722	571.621	943.22	812.81	927.874	Predicted protein
Phatr3_J42437	42.7095	41.1335	1.56808	61.2912	24.9551	59.9733	30.4977	23.4913	28.1801	30.8913	27.7365	42.2346	19.6427	29.5212	31.5034	35.7331	14.8357	31.6464	37.5523	24.607	39.8263	57.4941	36.8788	32.4102	32.9715	29.2819	31.3503	34.7868	56.4587	37.4388	Predicted protein
Phatr3_J31420	290.866	325.842	381.044	413.925	360.463	343.561	300.058	241.041	217.854	293.05	258.576	225.251	386.961	429.485	422.145	376.249	341.221	350.371	423.555	346.32	371.109	219.978	278.84	226.872	364.469	526.028	463.985	214.684	263.798	272.19	Predicted protein
Phatr3_J9252	262.884	282.289	487.673	277.07	370.63	275.02	567.651	624.05	506.159	535.171	523.415	533.212	408.568	483.766	392.742	454.021	376.599	426.096	387.749	403.737	456.192	391.627	454.239	365.515	409.025	470.601	552.811	384.643	384.503	470.514	Predicted protein
Phatr3_J42439	470.541	419.4	357.522	418.963	463.056	412.102	320.718	269.639	383.684	244.626	314.049	311.48	368.3	384.727	397.993	363.637	288.726	306.292	447.134	462.976	494.208	378.295	474.028	456.444	368.033	470.601	440.995	401.539	394.237	456.348	Predicted protein
Phatr3_J31423	129.601	115.335	23.5212	112.507	107.215	96.814	65.9144	74.5592	60.6957	49.2591	43.8416	77.4301	117.856	99.0388	76.6582	51.4978	50.2132	63.2928	157.196	180.451	161.115	101.656	64.7628	83.7264	204.067	195.561	197.507	75.5371	100.263	92.0791	Predicted protein
Phatr3_J42440	131.81	108.076	87.8125	173.798	135.867	172.209	54.1088	24.5126	53.1087	39.2403	55.4731	65.1116	68.7494	59.9946	77.7084	29.4273	22.8242	31.6464	68.9914	33.7207	54.3086	8.33248	23.3866	23.4074	31.1893	57.5179	47.0255	26.8356	31.1496	25.2965	Predicted protein
Phatr3_J42441	804.116	749.274	163.08	665.807	564.726	724.82	386.632	368.711	502.907	431.643	482.258	475.139	489.103	470.434	395.893	547.558	461.048	585.458	743.186	489.405	543.086	912.407	875.197	785.048	299.417	268.766	212.137	816.993	703.787	733.597	NA
Phatr3_J42442	1601.61	1466.29	1480.27	1461.75	1571.25	1643.27	1109.72	1062.21	980.886	1214.78	1229.36	1096.34	1337.67	1420.83	1354.65	1820.29	1852.18	1901.04	1275.03	1158.35	1250.91	1563.17	1555.21	1687.13	923.202	976.759	1015.75	1495.83	1458.19	1564.33	Predicted protein
Phatr3_J6387	257.73	245.994	221.099	355.153	350.296	324.713	159.375	131.755	105.134	152.787	163.735	174.218	246.516	196.173	233.125	183.921	261.337	221.525	112.657	123.946	133.961	82.4916	145.716	129.641	145.253	124.448	168.247	133.184	142.12	125.47	Predicted protein
Phatr3_J42443	686.297	591.999	620.96	466.82	605.393	538.903	781.134	790.532	768.451	774.787	726.518	710.949	650.173	624.706	650.02	724.122	732.656	747.081	765.892	686.261	725.925	854.913	866.202	785.048	748.543	757.145	705.382	826.933	880.95	924.839	Predicted protein
Phatr3_J31429	56.7005	78.2342	0	52.8951	52.6831	62.5436	66.8982	39.833	84.5404	48.4242	59.052	45.7541	68.7494	82.8497	65.107	71.4663	43.3659	87.0276	79.4712	85.6687	104.091	94.9903	73.7576	89.1281	62.3785	64.8384	77.3308	108.336	93.4489	104.221	Predicted protein
Phatr3_EG01838	0	0.806539	0	2.51881	1.84853	0	1.96759	0	0	0.834899	0	0	0.982134	4.76148	2.10023	0	0	0	0.873309	0.911369	0	0	0	0	0	3.13734	2.09002	0	0	1.01186	NA
Phatr3_J53929	404.267	410.528	548.828	413.086	434.404	423.24	313.831	293.13	314.317	240.451	274.681	230.53	355.533	281.88	292.982	277.457	231.665	206.832	294.305	293.461	293.266	222.477	250.956	303.396	287.832	279.223	312.458	259.41	254.064	280.285	Mevalonate kinase	MK
Phatr3_EG01882	647.269	721.046	360.658	837.926	758.821	754.807	1812.15	1922.2	1737.41	1518.68	1385.93	1462.37	1311.15	1531.29	1564.67	1567	1638.78	1593.62	1021.77	1068.13	1073.5	980.733	942.658	964.204	1406.19	1392.98	1291.63	1037.64	998.735	1120.13	NA
Phatr3_J31431	0	0.806539	0	2.51881	0	0.856761	0	0	0	0	0.894727	0	0	1.90459	0	0	0	1.13023	0	0	0	0.833248	0	0	0	0	0	0	0	0	Predicted protein
Phatr3_EG01820	29.4548	31.455	54.8828	30.2258	18.4853	23.9893	49.1898	29.6194	56.3603	26.7168	30.4207	10.5586	15.7141	22.8551	26.2528	23.1214	19.4006	18.0836	19.2128	21.8729	27.1543	34.1632	35.0798	28.8091	10.6935	12.5494	19.8552	29.8173	35.0433	30.3558	NA
Phatr3_J31432	37.5549	29.0354	0	32.7446	32.3493	26.5596	50.1736	43.9184	65.0311	37.5705	48.3153	56.3128	19.6427	29.5212	29.4032	32.5802	18.2593	28.2557	24.4527	29.1638	35.3006	36.6629	26.9845	38.7122	8.91122	18.8241	13.5851	33.7929	32.123	38.4506	Predicted protein
Phatr3_J31433	943.29	950.909	823.242	2105.73	1977.93	1953.42	6719.33	7339.49	7447.15	8459.2	8860.48	8853.42	576.513	745.648	681.523	979.509	1233.65	1146.05	288.192	530.417	511.406	275.805	348.1	343.008	549.822	533.348	506.83	510.869	572.374	496.823	Predicted protein
Phatr3_EG01782	0	0	0	0	0	0	0	0	0	0	0	0	0	0	0	0	0	0	0	0	0	0	0	0	0	0	0	0	0	0	NA
Phatr3_J31434	278.348	268.577	743.27	768.239	542.543	568.033	73.7847	102.136	85.6243	73.4711	59.052	86.2289	3.92854	14.2844	12.6014	6.30585	25.1066	10.1721	4.36655	2.73411	7.24115	9.99898	3.59793	2.70085	8.91122	7.32046	5.22505	12.9208	5.84055	11.1304	Predicted protein
Phatr3_EG02461	354.194	366.169	539.42	415.604	366.933	375.262	222.338	236.955	182.087	166.98	149.419	179.497	88.3921	59.0423	72.4578	55.7017	53.6368	63.2928	45.4121	56.5049	62.4549	59.9939	35.9793	37.8119	48.1206	84.7082	59.5656	27.8295	57.4321	45.5336	Predicted protein
Phatr3_J31436	223.857	220.185	32.9297	262.796	211.657	185.917	71.8171	71.4951	61.7796	115.216	97.5253	102.067	477.317	461.863	495.653	564.374	515.826	507.472	365.917	513.101	385.591	362.463	365.19	340.307	519.524	519.753	494.29	371.722	406.892	436.111	Predicted protein
Phatr3_J31437	276.139	239.542	263.438	289.664	274.507	299.01	102.315	112.349	111.637	125.235	86.7885	95.0278	125.713	97.1342	130.214	90.3838	112.98	108.502	46.2854	54.6822	39.8263	52.4946	60.2654	55.8176	51.6851	71.1131	48.0705	47.7076	58.4055	70.8301	Predicted protein
Phatr3_J42447	234.166	251.64	373.203	585.205	575.817	580.027	1133.33	921.266	845.404	744.73	753.36	721.507	50.0888	80.9451	68.2573	97.7407	118.686	80.2462	15.7196	25.5183	9.95657	19.998	28.7835	34.2108	23.1692	18.8241	31.3503	38.7625	31.1496	26.3083	Cytosolic aldolase	FBA4
Phatr3_EG01815	253.311	282.289	0	235.929	212.581	233.896	286.285	383.01	425.954	291.38	305.102	299.162	298.569	253.311	256.228	241.724	227.101	275.776	170.295	234.222	228.096	224.144	184.394	214.268	261.099	245.758	246.623	216.672	220.968	214.514	NA
Phatr3_J31440	726.797	777.503	1257.6	759.003	856.793	825.061	840.162	690.439	780.373	759.758	783.781	751.424	1385.79	1426.54	1216.03	1253.81	1275.87	1114.4	1207.79	1391.66	1421.07	1192.38	1146.84	1327.02	1334.01	1986.98	1999.11	1261.27	1245.01	1398.39	Acyl carrier protein	ACPZ
Phatr3_J17166	498.523	426.659	853.036	501.244	472.299	484.07	554.861	556.641	589.615	601.962	543.099	596.563	417.407	446.627	384.341	496.06	474.743	471.305	388.623	412.85	354.816	385.794	439.847	361.914	443.779	442.365	364.709	390.606	352.38	363.257	Predicted protein
Phatr3_J31442	81.0007	76.6212	84.6763	104.951	116.457	103.668	347.28	463.697	401.025	427.469	344.47	318.519	238.659	291.403	307.683	234.367	313.832	267.864	357.184	432.9	324.041	365.796	316.618	234.974	569.427	408.9	474.435	242.514	347.513	346.056	Predicted protein
Phatr3_J42451	16.9365	9.67846	10.9766	9.23565	12.9397	10.2811	15.7407	24.5126	5.41926	17.5329	15.2104	22.8771	45.1782	76.1837	53.5558	68.3134	70.755	59.9021	194.748	163.135	144.823	249.141	257.252	156.649	167.531	174.645	156.752	162.007	241.41	257.012	Predicted protein
Phatr3_J42452	171.574	170.18	233.644	153.648	195.02	197.912	298.09	336.027	283.969	308.078	257.681	265.726	353.568	420.915	451.549	352.077	359.481	366.194	488.18	546.822	511.406	484.95	447.943	442.039	327.933	391.122	392.924	444.277	424.414	449.265	Predicted protein
Phatr3_EG02462	1203.97	1104.96	3438.8	1216.59	1085.09	1089.8	9292.94	9797.9	8015.08	8111.05	7899.55	6755.77	2220.61	3018.78	3144.04	1837.1	2337.2	2302.27	1487.25	1975.85	1812.1	708.261	724.983	629.298	3134.08	3079.82	3037.85	716.609	725.202	640.506	Predicted protein
Phatr3_EG02453	382.912	446.016	1149.4	397.973	435.329	380.402	617.824	588.303	622.131	642.038	510.889	700.39	513.656	550.427	622.717	491.856	498.708	508.603	524.859	596.036	601.92	539.945	559.479	487.954	470.512	556.355	532.955	535.717	496.447	493.787	Predicted protein
Phatr3_J31447	398.376	436.337	594.302	424.84	415.919	455.797	247.917	244.105	234.112	225.423	238.892	193.575	294.64	183.793	214.223	192.328	156.346	131.106	261.993	327.182	295.982	194.98	208.68	225.071	300.308	375.435	331.268	200.77	196.632	235.763	Predicted protein
Phatr3_J17172	455.813	403.269	268.142	571.771	486.163	570.603	532.234	517.829	649.227	540.18	546.678	556.089	437.05	501.86	467.3	398.319	506.697	522.165	760.653	801.094	792.905	789.086	677.311	829.161	524.871	669.3	621.781	676.852	577.241	739.669	NA
Phatr3_EG02409	875.544	839.607	874.989	950.433	924.264	834.486	958.218	1077.53	872.501	911.71	895.622	878.127	815.171	863.732	885.245	838.678	713.256	646.49	813.051	794.714	801.957	744.091	739.375	735.532	743.196	786.427	752.408	754.377	801.129	849.961	Plastidic inositol phosphatase	FBPC2
Phatr3_J9359	327.685	373.427	341.842	395.454	328.114	360.697	159.375	129.713	112.721	140.263	150.314	156.62	196.427	191.411	202.672	246.979	278.455	212.483	77.7245	40.1003	57.9292	89.1575	103.441	124.239	33.8626	53.3348	40.7554	110.324	110.971	108.269	Fructose-1,6-bisphosphatase	FBPC3
Phatr3_J42457	649.478	647.651	689.955	783.351	663.622	783.08	2693.63	3015.05	2755.15	2121.48	2068.61	2187.4	1304.27	2039.82	2102.33	1238.05	1571.44	1603.79	451.501	836.637	532.224	194.98	234.765	196.262	2142.26	1541.48	1773.38	299.167	245.303	220.585	Predicted protein
Phatr3_J31453	32.4003	23.3896	31.3616	26.0278	25.8794	17.1352	45.2546	67.4097	81.2889	36.7356	31.3155	42.2346	107.053	128.56	131.264	45.1919	86.7319	77.9857	41.9189	71.9982	53.4034	39.9959	48.5721	22.5071	99.8057	136.997	105.546	51.6833	47.6979	52.6166	Predicted protein
Phatr3_J42458	690.715	704.108	2220.4	587.723	690.426	610.014	1438.31	1471.78	1621.44	1466.92	1396.67	1736.9	2262.84	2751.18	2642.08	2372.05	2332.63	2715.94	2551.81	2642.06	2564.27	2325.6	2554.53	2513.59	1229.75	1697.3	1774.43	2265.12	2148.35	2605.54	Phosphoserine transaminase	PSAT
Phatr3_J42459	208.393	234.703	244.621	217.458	203.338	164.498	268.576	309.472	321.904	228.762	242.471	241.089	292.676	357.111	328.685	270.101	342.363	310.813	215.707	211.438	262.492	237.476	221.273	219.669	228.127	263.537	254.983	245.496	305.656	256	Predicted protein
Phatr3_J8760	273.93	289.547	214.827	447.509	384.494	462.651	597.164	673.076	777.122	808.183	815.096	1015.39	96.2491	106.657	111.312	182.87	238.513	172.925	50.6519	48.3026	51.5932	138.319	134.922	90.9287	71.2898	47.0601	61.6556	100.385	107.077	116.364	Predicted protein
Phatr3_J42461	177.465	185.504	83.1083	233.41	205.187	185.917	146.586	130.734	107.301	164.475	178.051	131.983	154.195	84.7543	121.813	114.556	109.556	154.841	133.616	146.73	143.918	114.155	120.531	163.852	121.193	111.899	119.131	189.837	136.28	125.47	Predicted protein
Phatr3_J31458	65.5369	62.91	0	66.3288	74.8654	83.1059	78.7037	78.6446	62.8634	62.6175	57.2625	72.1507	65.803	69.5176	60.9066	52.5487	95.8616	66.6835	90.8242	102.985	98.6606	97.49	99.8426	91.829	113.173	108.761	118.086	105.354	85.6615	82.9724	Predicted protein
Phatr3_EG01752	166.42	170.18	180.329	130.978	136.791	172.209	125.926	142.99	207.016	160.301	179.84	195.335	165.981	151.415	168.018	232.265	227.101	232.827	248.893	271.588	235.337	274.972	248.257	241.276	231.692	213.339	183.922	253.447	251.144	276.237	NA
Phatr3_J53933	526.505	487.956	340.273	452.547	414.995	442.089	172.164	201.208	226.525	242.956	282.734	327.318	298.569	284.736	274.079	386.759	365.187	326.636	424.428	335.384	357.532	540.778	544.187	454.643	244.167	279.223	253.938	502.918	487.686	447.241	Predicted protein
Phatr3_J42464	201.765	179.052	283.823	159.525	231.066	157.644	298.09	337.048	287.221	323.106	370.417	350.195	388.925	468.53	462.05	481.347	475.884	627.277	1087.27	1080.88	847.214	1259.04	1232.29	1030.83	826.961	697.536	759.723	1049.57	1182.71	1091.8	Predicted protein
Phatr3_J17184	333.576	332.294	382.612	306.456	317.947	324.713	565.683	760.912	588.532	596.953	528.784	712.709	408.568	457.102	443.148	433.002	498.708	496.17	399.976	361.814	346.67	406.625	314.819	337.606	363.578	355.565	360.529	390.606	393.264	386.53	NA
Phatr3_J42466	215.756	236.316	15.6808	287.145	232.915	262.169	187.905	181.802	197.261	229.597	232.629	193.575	5.8928	8.57066	3.15034	51.4978	20.5418	19.2139	0.873309	0.911369	2.71543	0	3.59793	6.30199	0	1.04578	1.04501	7.95127	0.973426	3.03558	Predicted protein
Phatr3_EG02454	980.109	1054.15	1409.7	904.255	1059.21	967.284	1591.78	1715.88	1596.51	1498.64	1533.56	1458.85	1178.56	1166.56	1124.67	1267.48	1516.67	1374.36	1452.31	1477.33	1481.72	1591.5	1465.26	1519.68	1690.46	1617.82	1616.63	1564.41	1519.52	1629.09	Predicted protein
Phatr3_J31465	311.485	354.07	112.902	400.492	406.676	365.837	817.535	847.728	844.321	790.65	833.886	811.256	608.923	603.756	590.164	741.988	677.878	838.629	1020.03	1042.61	941.349	1174.05	1098.27	972.307	636.261	719.497	702.247	1000.87	1013.34	1012.87	Predicted protein
Phatr3_EG02455	33.873	21.7765	37.6339	62.1308	46.2132	53.1192	44.2708	61.2815	49.8572	65.1222	68.894	70.391	13.7499	4.76148	6.30068	4.2039	14.8357	6.78137	0	1.82274	1.81029	3.33299	17.9897	1.80057	0.891122	0	0	0	5.84055	6.07115	Predicted protein
Phatr3_EG02451	345.358	350.038	362.227	355.993	297.613	352.129	417.13	350.326	308.898	339.804	339.996	278.044	20.6248	10.4753	11.5512	58.8546	35.3775	25.9952	29.6925	49.214	30.7749	7.49923	10.7938	10.8034	52.5762	65.8842	65.8357	5.96346	8.76083	6.07115	Cyanate hydratase	CYN
Phatr3_J8934	191.456	203.248	45.4743	222.495	146.034	269.023	95.4282	91.9223	113.804	98.5181	97.5253	95.0278	1.96427	8.57066	3.15034	8.4078	6.84725	15.8232	1.74662	1.82274	2.71543	6.66598	6.29638	3.60114	0.891122	0	0	9.93909	6.81398	0	NA
Phatr3_J31469	145.065	146.79	50.1786	126.78	120.154	137.082	60.9954	45.9612	70.4504	62.6175	77.8413	61.5921	50.0888	43.8056	43.0546	37.8351	22.8242	50.8603	75.9779	52.8594	43.4469	120.821	105.24	91.829	28.5159	21.9614	27.1703	74.5432	79.8209	78.925	Predicted protein
Phatr3_EG02456	1715.74	1835.68	1350.12	1608.68	1875.33	1641.55	1889.87	2073.36	2272.84	1835.94	1778.72	2009.66	1924.98	1991.25	2072.92	2165.01	1975.43	2220.9	1684.61	1828.21	1695.33	2147.28	1915	2106.66	1731.45	1732.86	1737.85	2106.09	2039.33	2317.16	Serine/threonine-protein phosphatase
Phatr3_J42473	242.266	280.675	225.804	319.05	266.188	228.755	92.4769	84.7728	121.391	80.9852	85.8938	93.268	115.892	119.037	115.512	80.9251	63.9077	88.1578	58.5117	34.632	60.6446	42.4957	50.3711	61.2193	21.3869	39.7397	43.8905	44.7259	57.4321	41.4862	Predicted protein
Phatr3_J42474	146.538	141.951	86.2444	143.572	172.837	142.222	187.905	233.891	236.28	261.324	255.892	337.877	392.854	572.33	631.118	509.723	681.302	709.783	827.897	802.916	774.803	934.904	914.774	672.512	884.884	654.659	714.787	891.537	1020.15	1037.16	Predicted protein
Phatr3_J17198	1205.44	1221.91	991.027	1079.73	1287.5	1338.26	1097.92	997.868	1233.42	1116.26	1130.94	1640.11	1694.18	1841.74	1737.94	2252.24	2224.22	2517.02	2685.43	2640.24	2606.81	3327.16	3274.12	3232.92	2020.17	2234.83	2234.23	3163.61	3018.59	3217.71	Predicted protein
Phatr3_J31474	1218.69	1185.61	362.227	989.055	950.144	965.57	541.088	468.804	572.274	820.706	800.781	797.178	816.153	598.994	611.166	2325.81	2213.95	2643.6	6.98648	4.55685	11.7669	135.819	122.33	215.168	19.6047	16.7325	18.8102	254.441	211.233	197.312	Predicted protein
Phatr3_EG02407	1072.89	1037.21	1737.43	1026.84	905.779	917.592	620.776	484.124	624.299	764.768	739.045	751.424	162.052	138.083	133.364	749.345	747.492	756.123	72.4847	58.3276	60.6446	144.985	141.219	155.749	56.1407	67.9757	34.4854	162.007	148.934	137.613	Predicted protein
Phatr3_J42479	208.393	200.022	83.1083	341.719	304.083	369.264	260.706	301.301	370.677	258.819	258.576	181.257	44.196	39.0441	48.3052	31.5292	38.8011	40.6882	10.4797	10.9364	23.5337	9.99898	9.89432	19.8062	31.1893	33.465	22.9902	17.8904	9.73426	14.166	Predicted protein
Phatr3_J42481	441.822	439.564	448.471	533.149	456.587	417.243	470.255	439.184	444.379	501.775	468.837	452.262	373.211	303.782	289.831	261.693	231.665	287.078	227.934	171.337	178.313	179.148	171.801	163.852	204.958	180.92	168.247	172.94	152.828	156.838	Predicted protein
Phatr3_J17199	1018.4	980.751	658.594	976.461	1043.49	1040.11	1613.43	1484.03	1696.23	1110.42	1000.3	1210.72	1381.86	1532.24	1557.32	1524.96	1518.95	1470.43	1263.68	1366.14	1244.57	1344.86	1341.13	1286.51	1764.42	1725.54	1851.76	1279.16	1159.35	1411.54	NA
Phatr3_J42483	820.316	752.501	597.439	716.183	646.985	657.136	180.035	106.221	174.5	226.258	212.05	249.888	120.802	55.2332	86.1093	470.837	435.942	419.315	1.74662	7.29096	2.71543	9.99898	9.89432	13.5043	4.45561	4.18312	6.27006	21.866	19.4685	10.1186	Predicted protein
Phatr3_J42484	456.549	385.525	290.095	424.84	427.934	406.105	235.127	213.464	275.298	257.149	260.366	288.603	421.336	378.061	376.991	479.245	496.426	393.319	237.54	277.968	289.646	245.808	241.061	275.487	325.26	361.84	338.583	321.033	332.912	275.226	Predicted protein
Phatr3_J53935	1649.47	1640.5	3396.46	1627.15	1833.74	1718.66	229.225	184.866	304.562	338.134	271.102	371.312	2486.76	2581.67	2434.16	2818.71	2406.81	2684.29	2169.3	2679.43	2846.68	2934.7	2857.66	3251.83	1949.78	2853.94	2777.64	2930.04	2580.55	3177.24	Ribulose-phosphate 3-epimerase	RPE
Phatr3_J9462	2531.64	2553.5	7479.74	3393.68	2917.9	2936.98	7700.17	9407.74	6465.18	5968.7	5748.62	4754.91	1805.16	2851.17	3256.4	1730.96	1985.7	1887.48	355.437	720.893	434.469	288.304	294.131	280.889	1063.11	905.646	843.324	306.124	330.965	307.605	Predicted protein
Phatr3_J42487	1263.61	1241.26	2411.71	1707.76	1307.83	1419.65	1159.9	1254.23	1139.13	1054.48	966.305	735.586	816.153	797.072	749.781	509.723	551.204	492.779	550.185	518.569	455.287	227.477	245.559	255.681	791.316	749.825	720.012	246.49	259.905	212.49	Predicted protein
Phatr3_J31486	205.447	236.316	191.306	340.04	208.884	268.166	180.035	194.058	120.308	197.871	165.525	151.341	138.481	100.943	100.811	75.6702	79.8846	70.0741	215.707	194.122	134.866	74.1591	78.255	90.0284	292.288	185.103	197.507	102.373	76.9006	99.1621	Predicted protein
Phatr3_J42488	620.024	675.879	624.096	746.409	727.396	767.658	1524.88	1675.03	1617.11	1440.2	1376.99	1450.05	190.534	194.268	181.67	334.21	293.291	360.543	54.1452	31.8979	51.5932	64.1601	60.2654	67.5213	40.1005	37.6481	42.8454	65.598	64.2461	80.9487	Predicted protein
Phatr3_J9007	175.992	177.439	114.47	146.091	186.701	156.787	87.5579	90.9009	85.6243	89.3342	110.051	135.503	148.302	135.226	137.565	154.493	154.063	146.93	114.404	85.6687	127.625	159.984	156.51	177.356	64.1608	71.1131	93.006	164.989	145.04	171.004	Predicted protein
Phatr3_J9033	472.75	493.602	805.993	469.339	462.132	525.195	579.456	685.332	582.028	663.745	681.782	593.044	583.388	643.752	631.118	709.408	776.022	813.764	492.547	509.456	481.536	619.937	678.21	562.677	525.762	455.96	493.245	667.907	632.727	562.593	Predicted protein
Phatr3_J3311	260.675	293.58	392.02	291.343	308.704	312.718	740.799	807.895	745.69	654.561	652.256	529.692	66.7851	70.4699	105.011	115.607	156.346	123.195	25.326	30.0752	35.3006	54.1611	57.5669	53.1168	48.1206	51.2432	33.4403	42.7381	60.3524	54.6404	Cysteine synthase	CYSK
Phatr3_J9319	346.094	294.387	735.43	336.682	324.417	363.267	347.28	326.835	230.86	342.309	326.575	276.285	361.425	440.913	341.287	400.421	439.365	389.929	443.641	443.837	427.228	471.618	488.419	442.039	493.682	430.862	444.13	488.009	453.616	453.313	Predicted protein
Phatr3_J31492	189.247	202.441	23.5212	109.988	162.671	167.068	252.836	313.557	338.162	280.526	249.629	293.882	308.39	300.925	343.387	315.292	352.634	350.371	298.672	252.449	293.266	279.971	267.147	294.393	216.543	202.881	202.732	304.136	226.808	310.641	Predicted protein
Phatr3_J17215	233.429	245.188	68.9955	263.636	265.264	264.739	297.107	348.283	311.065	279.691	365.049	304.441	144.374	184.745	205.822	215.45	229.383	283.687	158.069	131.237	134.866	149.151	155.611	184.558	101.588	130.723	95.096	248.477	168.403	177.075	Predicted protein
Phatr3_J31494	181.883	165.34	186.602	141.054	218.126	173.066	1008.39	1063.23	870.333	926.738	900.096	864.049	532.317	662.798	697.275	754.6	859.33	1020.6	647.122	738.209	629.074	816.583	853.61	641.902	638.935	561.584	541.316	674.864	841.04	790.262	Predicted protein
Phatr3_J42494	994.836	830.735	15.6808	624.666	756.973	1172.91	238.079	236.955	255.789	327.281	365.943	288.603	718.922	694.224	536.608	1017.34	965.463	1330.28	112.657	86.5801	71.5063	489.95	465.932	800.352	47.2295	97.2576	106.591	739.469	413.706	571.7	Predicted protein
Phatr3_EG01836	4.41822	8.87193	0	5.87723	10.1669	3.42705	1.96759	3.06408	4.33541	6.6792	7.15782	0	2.9464	1.90459	4.20045	15.7646	11.4121	7.9116	2.61993	1.82274	1.81029	6.66598	3.59793	4.50142	0	3.13734	0	4.96955	11.6811	5.05929	NA
Phatr3_J42495	259.202	268.577	387.316	213.26	246.779	240.75	432.87	413.65	383.684	426.634	417.838	427.625	481.246	516.144	421.095	591.699	669.89	688.309	1487.25	1424.47	1301.6	1868.14	1829.55	1560.19	1018.55	928.653	921.699	1634.98	1519.52	1449.99	Predicted protein
Phatr3_J42496	367.449	422.626	520.603	393.775	415.919	360.697	256.771	283.938	349	327.281	339.996	341.396	355.533	290.45	240.476	340.516	296.714	346.98	312.645	390.977	362.057	444.121	408.365	430.336	341.3	330.467	259.163	392.594	427.334	441.17	Predicted protein
Phatr3_J42497	1005.15	966.233	1146.27	776.635	932.583	879.894	807.697	1052	962.46	977.667	1018.2	893.965	989.009	977.055	899.947	1202.32	1146.91	1329.15	1090.76	911.369	978.46	1341.53	1371.71	1174.87	1194.1	789.564	773.308	1360.66	1360.85	1303.27	Predicted protein
Phatr3_EG01753	2.94548	1.61308	0	2.51881	0	3.42705	1.96759	1.02136	0	2.5047	0	0	3.92854	8.57066	3.15034	2.10195	2.28242	1.13023	4.36655	0	0.905143	2.49974	0.899483	4.50142	4.45561	1.04578	1.04501	2.98173	0.973426	2.02372	NA
Phatr3_J42498	435.195	409.722	519.035	411.406	454.738	454.94	793.924	911.052	854.075	915.05	918.885	818.295	915.349	1267.51	1196.08	1458.75	1494.98	1613.97	999.939	1180.22	1182.12	1234.04	1213.4	1248.69	1149.55	1118.99	1202.81	1297.05	1189.53	1339.7	Predicted protein
Phatr3_EG01826	513.25	579.901	807.561	470.179	532.376	449.8	674.884	838.536	822.644	812.357	720.255	696.871	838.743	794.215	940.901	829.219	963.18	856.713	855.843	770.107	821.87	883.243	840.117	810.256	1211.93	790.61	860.044	822.957	943.249	867.163	NA
Phatr3_J42500	281.293	305.678	341.842	184.713	246.779	243.32	373.843	450.419	458.469	318.932	356.101	360.754	341.783	408.535	381.191	461.378	417.682	533.468	483.813	428.344	386.496	503.282	512.705	453.743	675.471	529.165	478.615	493.973	509.102	491.763	Predicted protein
Phatr3_J42501	634.751	601.678	323.025	574.29	680.259	606.587	991.667	1006.04	976.551	918.389	801.676	798.938	941.867	965.628	1025.96	1199.16	1059.04	1036.42	753.666	756.437	794.716	976.567	899.483	950.7	856.368	968.393	890.349	997.885	833.252	1039.18	Predicted protein
Phatr3_EG01854	0	0	0	0	0	0	0	0	0	0	0	0	0	0	0	0	0	0	0	0	0	0	0	0	0	0	0	0	0	0	NA
Phatr3_EG01855	0	0	0	0	0	0	0	0	0	0	0	0	0	0	0	0	0	0	0	0	0	0	0	0	0	0	0	0	0	0	NA
Phatr3_J42502	39.0276	55.6512	25.0893	52.0555	59.1529	49.6922	18.6921	13.2777	19.5093	13.3584	27.7365	26.3966	4.91067	8.57066	2.10023	10.5097	7.98846	10.1721	6.11317	15.4933	16.2926	16.665	12.5928	18.0057	2.67337	10.4578	13.5851	11.9269	23.3622	12.1423	Predicted protein
Phatr3_J42503	393.222	383.106	530.011	418.963	390.04	397.537	240.046	262.489	301.311	271.342	271.102	357.234	427.228	347.588	436.847	351.026	351.492	345.85	541.452	632.49	581.102	435.789	429.053	451.042	727.156	633.743	631.186	386.631	444.856	437.123	Predicted protein
Phatr3_J8683	38.2912	29.0354	10.9766	40.301	63.7742	49.6922	261.69	297.215	249.286	222.083	271.997	295.642	24.5534	28.5689	25.2027	37.8351	43.3659	31.6464	79.4712	78.3778	79.6526	70.8261	79.1545	70.2221	113.173	89.9371	94.051	66.5919	94.4223	79.9368	Predicted protein
Phatr3_J42504	190.72	216.152	0	161.204	195.02	214.19	228.241	315.6	381.516	267.168	200.419	286.843	285.801	274.261	263.578	351.026	332.092	332.287	168.549	205.058	243.484	269.972	225.77	357.413	226.345	315.826	293.648	290.222	208.313	310.641	Predicted protein
Phatr3_EG01833	0	0	0	0	1.84853	0	0	0	0	0	0	0	0	0	0	0	0	0	0	0	0	0	0	0	0	0	2.09002	0	0	0	NA
Phatr3_J42505	642.115	607.324	837.355	607.874	634.045	592.022	434.838	444.291	430.289	539.345	496.574	424.106	487.139	476.148	432.647	691.541	609.406	693.96	489.053	455.685	478.821	654.1	701.597	695.019	233.474	315.826	309.323	757.359	673.611	651.637	Predicted protein
Phatr3_J31508	104.565	133.885	0	87.3189	130.321	111.379	108.218	71.4951	81.2889	71.8014	64.4204	68.6312	130.624	115.228	107.112	131.372	122.109	98.3298	93.4441	86.5801	117.669	104.156	124.129	134.142	54.3584	120.265	65.8357	107.342	114.864	119.399	Predicted protein
Phatr3_EG02200	0	0	0	0	0	4.28381	0.983796	0	0	0	0.894727	0	0	0	0	0	0	0	0	0	0	0	0	0	0	0	0	0	0	0	Predicted protein
Phatr3_EG02192	11778.2	10802.8	33820.4	12556.3	11985.9	11317	2534.26	1933.43	2037.64	2806.1	2786.18	3176.39	666.869	413.296	371.74	1627.96	1332.93	1260.2	159.816	134.883	123.099	259.14	304.025	337.606	71.2898	130.723	70.0157	219.654	293.975	299.51	NA
Phatr3_J42507	183.356	170.986	47.0424	185.553	229.218	250.174	750.637	959.056	824.811	760.593	704.15	686.312	249.462	304.735	269.879	317.394	312.691	308.552	57.6384	53.7708	55.2137	34.9964	29.6829	44.1139	121.193	100.395	107.636	61.6224	56.4587	49.5811	Predicted protein
Phatr3_J31511	183.356	182.278	357.522	197.307	198.717	191.915	85.5903	86.8155	110.553	103.528	109.157	146.061	244.551	186.65	181.67	197.583	241.936	204.571	109.164	114.833	102.281	99.1565	113.335	155.749	115.846	100.395	115.996	139.147	103.183	97.1384	Predicted protein
Phatr3_J1598	317.376	325.035	401.429	285.466	257.87	346.132	137.731	132.777	160.41	207.055	203.998	174.218	363.39	341.874	289.831	389.912	402.847	403.491	342.337	292.55	321.326	412.458	415.561	389.823	296.744	253.079	247.668	427.381	445.829	408.791	NA
Phatr3_J42510	146.538	157.275	148.968	207.382	235.687	222.758	270.544	290.066	279.634	289.71	351.628	439.944	257.319	356.159	290.881	360.484	489.579	359.413	232.3	308.954	250.725	252.474	230.268	238.575	611.31	499.883	591.476	248.477	280.347	331.89	Predicted protein
Phatr3_EG01794	43.4458	56.4577	6.27232	45.3387	40.6676	53.1192	35.4167	41.8757	44.4379	27.5517	23.2629	35.1955	36.339	29.5212	17.8519	21.0195	25.1066	24.865	68.1181	51.9481	56.1189	46.6619	55.768	54.017	105.152	59.6095	86.7359	53.6711	34.0699	30.3558	NA
Phatr3_EG01884	0	0	0	0	0	0	0	0	0	0	0	0	0	0	0	0	0	0	0	0	0	0	0	0	0	0	0	0	0	0	NA
Phatr3_J42512	1062.58	973.492	859.308	1109.96	1086.93	1065.81	1350.75	1739.37	1577	1484.45	1521.04	1490.53	1419.18	1599.86	1594.07	1618.5	2029.07	1953.03	1774.56	1734.34	1592.15	1913.14	1831.35	1661.02	2113.74	1617.82	1689.78	1940.11	1955.61	1801.11	Predicted protein
Phatr3_EG01811	0	0	0	0	0	0	0	0	0	0	0	0	0	0	0	0	0	0	0	0	0	0	0	0	0	0	0	0	0	0	NA
Phatr3_EG01762	0	0	0	0	0	0	0	0	0	0	0	0	0	0	0	0	0	0	0	0	0	0	0.899483	0	0	0	2.09002	0	0	0	NA
Phatr3_J42513	365.976	378.267	912.623	327.446	332.735	323.856	317.766	318.664	427.038	335.63	337.312	344.916	338.836	300.925	350.738	344.72	410.835	434.008	326.618	351.789	299.602	358.297	422.757	354.712	347.538	301.185	275.883	409.491	402.025	348.079	Predicted protein
Phatr3_J42514	1073.63	1013.01	3487.41	1284.6	875.278	1034.97	3083.22	3323.5	3001.19	2629.93	2607.23	2817.4	172.856	122.846	128.114	109.301	100.426	119.804	225.314	115.744	171.072	116.655	125.928	157.55	215.652	192.424	166.157	69.5737	85.6615	58.6878	Predicted protein
Phatr3_J31518	0	0	0	0	0	0	0	0	0	0	0	0	0	0	0	0	0	0	0	0	0	0	0	0	0	0	0	0.993909	0	0	Predicted protein
Phatr3_J42515	904.263	745.242	1461.45	824.492	920.567	742.812	1184.49	894.71	748.942	841.579	910.832	816.535	783.743	721.84	730.879	755.651	701.844	559.463	708.254	704.489	687.909	697.429	674.612	622.096	375.162	521.845	509.965	606.285	709.627	699.194	Predicted protein
Phatr3_J53939	972.009	945.263	2226.67	1010.88	952.917	903.883	5564.35	6007.63	5167.81	4710.5	4581.9	4337.84	1284.63	1512.25	1637.13	1096.17	1247.34	1313.33	868.07	1100.02	1024.62	574.108	655.723	545.572	1298.36	1273.76	1283.27	609.266	547.065	685.028	Proteasome alpha 1 subunit
Phatr3_J24353	2753.29	2728.52	6689.43	2818.55	2855.05	3010.66	2766.44	2585.06	3513.85	3273.64	3551.17	4424.07	1752.13	1703.66	1780.99	2935.37	2801.67	3412.16	930.948	847.574	887.945	1831.48	1815.16	1942.81	196.938	308.505	308.278	1597.21	1497.13	1729.27	3-deoxy-7-phosphoheptulonate synthase	AROA
Phatr3_J42518	222.384	213.733	225.804	189.751	198.717	199.625	301.042	343.177	293.724	339.804	281.839	244.609	401.693	400.917	454.699	404.625	425.671	370.715	206.101	249.715	261.586	234.143	252.755	234.074	219.216	267.72	326.043	254.441	294.948	241.834	Predicted protein
Phatr3_J42519	333.576	358.103	257.165	370.266	351.22	358.983	534.201	480.039	462.805	525.152	445.574	418.826	540.174	488.528	540.808	373.096	414.259	417.054	298.672	278.879	357.532	172.482	206.881	205.265	335.062	364.977	347.989	208.721	193.712	241.834	Fucoxanhin chlorophyll binding protein related
Phatr3_J17226	491.895	489.569	241.484	419.802	484.315	526.908	356.134	381.988	378.264	362.346	417.838	441.703	460.621	471.386	542.908	433.002	470.178	430.617	468.967	528.594	466.149	386.627	386.778	416.831	800.228	688.124	725.237	338.923	431.228	446.23	Predicted protein
Phatr3_J31525	472.75	363.749	271.278	420.642	368.781	436.092	198.727	168.524	231.944	184.513	245.155	219.972	250.444	199.982	142.815	186.023	162.052	153.711	151.083	134.883	156.59	169.149	150.214	204.364	91.7856	109.807	107.636	143.123	161.589	145.708	Predicted protein
Phatr3_J42521	86.1553	86.2996	109.766	128.46	103.518	100.241	24.5949	26.5553	19.5093	15.0282	24.1576	12.3184	42.2318	26.6643	15.7517	28.3763	20.5418	10.1721	68.1181	29.1638	40.7314	45.8286	42.2757	54.9173	17.8224	13.5951	20.9002	36.7746	36.9902	36.4269	Predicted protein
Phatr3_J17228	566.269	559.738	791.881	524.753	552.71	544.044	311.863	303.344	356.587	331.455	288.102	307.961	480.264	432.342	384.341	460.327	411.976	423.836	547.565	563.226	611.877	648.267	767.259	716.626	441.997	523.936	561.171	713.627	645.381	764.965	Predicted protein
Phatr3_J42523	488.95	462.147	453.175	530.63	558.256	492.638	1140.22	1322.66	1165.14	1103.74	1115.72	976.675	851.51	988.483	952.452	780.874	693.855	830.718	632.276	694.464	748.553	319.134	314.819	384.421	1397.28	1574.95	1536.17	384.643	361.141	376.411	Predicted protein
Phatr3_J31529	53.755	54.8446	0	44.4991	44.3647	46.2651	34.4329	69.4524	67.1988	50.094	49.21	26.3966	25.5355	42.8533	32.5535	44.1409	35.3775	11.3023	41.0455	30.9866	43.4469	23.3309	35.9793	47.715	26.7337	19.8698	11.4951	40.7503	26.2825	35.415	Predicted protein
Phatr3_J24362	190.72	177.439	144.263	172.119	156.201	216.761	197.743	194.058	185.339	158.631	163.735	142.542	208.212	192.364	186.92	200.736	188.299	144.669	177.282	252.449	200.942	244.142	236.564	234.074	123.866	141.18	155.707	242.514	235.569	178.087	Predicted protein
Phatr3_J6528	377.758	368.588	156.808	312.333	353.993	355.556	364.005	356.454	358.755	349.823	323.891	311.48	310.354	280.927	331.836	306.885	268.184	320.985	320.505	290.727	316.8	329.133	306.724	295.293	343.973	321.055	300.963	304.136	318.31	284.332	Predicted protein
Phatr3_J17238	636.96	675.879	809.129	704.429	713.532	734.245	925.752	898.796	748.942	913.38	1001.2	1018.91	492.049	485.671	541.858	653.706	607.123	669.095	508.266	406.471	421.797	617.437	638.633	671.612	295.853	337.787	334.403	682.816	550.959	631.4	Anthranilate synthase
Phatr3_EG02195	0	0	0	0	0	0	0	0	0	0	0	0	0	0	0	0	0	0	0	0	0	0	0	0	1.78224	0	0	0.993909	0	0	NA
Phatr3_EG02474	0	0	0	0	0	0	0	0	0	0	0	0	0	0	0	0	0	0	0	0	0	0	1.79897	0	0	0	0	0	0	0	Predicted protein
Phatr3_EG01778	0	0	0	0	0	0	0	0	0	0	0	0	0	0	0	0	0	0	0	0	0	0	0	0	0	0	0	0	0	0	NA
Phatr3_J31535	0	0	0	1.67921	0	4.28381	0	0	0	0	1.78945	0	0	0	0	0	0	0	0	0	0	0.833248	0	0.900284	0	0	0	0	0.973426	0	Predicted protein
Phatr3_J42527	477.168	480.697	619.392	509.64	484.315	487.497	322.685	348.283	328.407	372.365	341.786	366.033	350.622	326.637	289.831	335.261	319.539	292.729	255.006	277.056	247.104	280.805	288.734	267.384	252.188	277.132	282.153	270.343	246.277	266.119	Predicted protein
Phatr3_J31537	0	0	0	0	0	0.856761	0	0	0	0.834899	0	0	0	0	0	0	0	1.13023	0	3.64548	0	0	0	0	0	0	0	0	0.973426	0	Gag-pol polyprotein
Phatr3_J31539	69.9552	105.657	112.902	196.468	163.595	166.212	46.2384	40.8544	59.6119	85.9946	63.5256	103.827	7.85707	14.2844	5.25056	14.7136	15.9769	15.8232	4.36655	9.11369	5.43086	4.99949	2.69845	9.00284	2.67337	7.32046	2.09002	0.993909	5.84055	4.04743	Predicted protein
Phatr3_J42528	8.10007	4.03269	0	15.1129	9.24264	22.2758	47.2222	74.5592	71.5342	48.4242	60.8414	36.9553	5.8928	3.80918	5.25056	7.35682	1.14121	2.26046	0	0	0	4.99949	0	0.900284	0	0	0	0	0.973426	1.01186	Predicted protein
Phatr3_EG01769	5.89096	6.45231	0	9.23565	2.77279	4.28381	0.983796	3.06408	0	10.8537	7.15782	8.79887	1.96427	0	0	4.2039	11.4121	10.1721	5.23986	3.64548	2.71543	14.1652	8.99483	9.00284	8.0201	6.27468	6.27006	5.96346	5.84055	4.04743	NA
Phatr3_J42529	194.402	187.117	301.071	261.957	268.037	250.174	137.731	144.012	130.062	166.98	152.104	204.134	63.8387	25.712	24.1526	40.988	31.9539	32.7766	22.706	12.7592	19.008	22.4977	18.8891	13.5043	10.6935	10.4578	15.6752	10.933	15.5748	10.1186	Predicted protein
Phatr3_J42530	21.3547	12.0981	17.2489	23.5089	14.7882	11.9947	126.91	142.99	69.3665	123.565	107.367	84.4692	22.5891	12.3798	11.5512	17.8666	11.4121	11.3023	0	0.911369	0.905143	0.833248	0	0	1.78224	1.04578	0	0	0	0	Predicted protein
Phatr3_J42531	290.13	256.479	398.292	297.22	310.553	263.883	355.15	405.48	440.044	324.776	372.206	395.949	257.319	296.164	278.28	271.152	278.455	289.338	189.508	215.995	224.476	169.149	170.902	156.649	287.832	229.026	245.578	180.892	164.509	169.992	Predicted protein
Phatr3_J31544	979.372	1030.76	1452.04	1241.78	1054.59	1148.92	852.951	725.165	773.87	805.678	838.359	679.273	688.476	681.844	642.669	586.444	611.688	631.797	751.046	680.793	671.616	671.598	676.411	626.598	797.554	820.938	845.414	615.23	734.936	703.242	Predicted protein
Phatr3_J9386	23.5638	26.6158	0	21.8297	21.2581	21.419	37.3843	23.4913	22.7609	33.396	24.1576	36.9553	24.5534	31.4258	15.7517	32.5802	20.5418	18.0836	35.8057	35.5434	19.9131	21.6645	37.7783	28.8091	32.9715	31.3734	16.7202	32.799	35.0433	29.3439	Predicted protein
Phatr3_EG01806	7.3637	12.9046	0	0.839605	5.54559	17.992	4.91898	8.17087	3.25156	8.34899	4.47364	8.79887	19.6427	14.2844	8.4009	2.10195	12.5533	16.9534	14.8463	13.6705	20.8183	6.66598	13.4922	17.1054	24.0603	18.8241	15.6752	11.9269	10.7077	15.1779	NA
Phatr3_EG01807	399.113	351.651	216.395	333.323	363.236	333.28	264.641	234.913	306.73	267.168	239.787	278.044	174.82	152.367	123.913	248.03	188.299	197.79	158.069	190.476	175.598	250.808	248.257	274.587	221.889	169.416	158.842	213.691	198.579	211.478	NA
Phatr3_J9180	614.869	607.324	867.148	448.349	600.772	574.887	198.727	183.845	242.783	361.511	358.786	410.027	1170.7	1269.41	1222.33	1346.3	1278.15	1338.19	2970.13	2994.76	2891.93	2245.6	2244.21	1578.2	4500.17	3909.13	4001.35	1879.48	2299.23	2466.91	NA
Phatr3_J42534	181.883	205.667	362.227	162.883	170.065	171.352	88.5417	53.1107	65.0311	61.7826	63.5256	29.9162	172.856	119.989	134.414	85.129	100.426	66.6835	164.182	147.642	130.341	139.986	127.727	134.142	130.104	166.279	137.941	123.245	139.2	136.601	NA
Phatr3_J42535	240.793	283.095	269.71	308.135	272.658	261.312	292.188	307.429	285.053	253.809	357.891	262.206	345.711	310.448	374.89	278.508	306.985	256.562	240.16	302.575	343.049	261.64	260.85	263.783	311.893	363.932	351.124	275.313	243.356	231.716	Predicted protein
Phatr3_J9538	2210.58	2402.68	1684.12	2220.76	2756.16	2727.07	4294.27	4134.46	5000.89	4191.2	4045.06	4670.44	6449.67	7910.72	7553.46	7445.11	7157.66	8246.14	8018.73	8761.91	8674.89	8945.75	8636.84	9090.17	7620.88	9997.66	10010.2	8616.2	8279.96	9429.51	Predicted protein
Phatr3_EG01766	0	0	0	0	0	0	0	0	0	0	0	0	0	0	0	0	0	0	0	0	0	0	0	0	0	0	0	0	0	0	NA
Phatr3_EG01776	0	0	0	0	0	0	0	0	0	0	0	0	0	0	0	0	0	0	0	0	0	0	0	0	0	0	0	0	0	0	NA
Phatr3_EG01784	0	0	0	0	0	0	0	0	0	0	0	0	0	0	0	0	0	0	0	0	0	0	0	0	0	0	0	0	0	0	NA
Phatr3_J42537	76.5825	67.7492	1.56808	92.3565	95.1992	83.1059	128.877	103.157	110.553	110.207	90.3674	128.464	77.5886	120.942	77.7084	95.6387	84.4495	115.283	102.177	92.0483	76.032	77.4921	85.4509	72.923	115.846	73.2046	93.006	111.318	109.024	124.459	Predicted protein
Phatr3_J51345	344.621	376.654	657.026	398.812	379.873	324.713	303.993	297.215	317.569	284.701	268.418	318.519	331.961	320.924	350.738	298.477	286.443	319.855	327.491	390.977	370.204	343.298	333.708	320.501	245.059	325.238	318.728	295.191	258.931	373.376	Histone acetyltransferase
Phatr3_J42538	2.20911	13.7112	18.817	6.71684	2.77279	5.99733	3.93519	1.02136	2.1677	8.34899	0	1.75977	0	0.952296	1.05011	2.10195	2.28242	1.13023	0	0	2.71543	0	2.69845	4.50142	7.12898	1.04578	1.04501	0.993909	1.94685	0	Predicted protein
Phatr3_J42539	129.601	139.531	163.08	110.828	116.457	155.074	203.646	186.909	185.339	171.989	183.419	156.62	163.034	229.503	254.127	237.52	294.432	253.171	113.53	92.0483	126.72	121.654	138.52	158.45	84.6566	83.6624	86.7359	139.147	142.12	115.352	Predicted protein	HCDK2
Phatr3_J9342	613.396	607.324	402.997	729.617	576.741	696.547	501.736	471.868	498.572	438.322	490.31	464.58	351.604	281.88	237.326	239.622	223.677	187.618	32.3125	20.9615	17.1977	17.4982	31.4819	24.3077	38.3182	30.3276	27.1703	19.8782	26.2825	25.2965	Predicted protein
Phatr3_J31556	398.376	407.302	327.729	497.886	379.873	431.808	813.6	891.646	862.746	840.744	697.887	677.513	453.746	581.853	580.712	561.221	594.57	583.198	330.111	331.738	356.626	370.795	376.883	380.82	320.804	371.252	368.889	406.509	311.496	406.767	Predicted protein
Phatr3_EG02412	692.924	730.724	363.795	726.258	783.776	693.12	618.808	655.712	661.15	675.434	736.36	809.496	744.458	724.697	809.637	811.353	868.46	851.062	559.791	626.111	553.042	508.281	538.79	547.373	499.919	512.432	609.241	635.108	602.55	611.163	Predicted protein
Phatr3_J31559	186.302	177.439	189.738	165.402	169.14	163.641	143.634	107.243	118.14	158.631	129.735	131.983	164.016	146.654	174.319	126.117	155.204	175.185	129.25	139.44	118.574	147.485	102.541	131.441	181.789	134.906	123.311	116.287	134.333	146.719	Predicted protein
Phatr3_J42543	1840.93	1793.74	1919.33	1511.29	1887.35	1698.96	2432.93	2419.6	2741.06	2167.4	2148.24	2637.9	1890.61	1914.11	1922.76	2709.41	2710.37	2775.84	1144.91	1359.76	1456.38	2268.1	2089.5	2327.23	698.64	953.752	933.195	2102.12	2079.24	2290.85	Predicted protein
Phatr3_J9185	582.469	640.392	442.199	598.638	516.664	699.974	680.787	646.52	704.504	793.154	762.308	805.977	800.439	934.202	973.455	1037.31	1165.17	1269.25	549.312	524.949	548.517	479.951	514.504	528.467	762.8	583.546	570.576	637.096	576.268	613.186	NA
Phatr3_EG02183	422.676	346.005	379.475	332.484	394.661	341.848	230.208	212.443	272.047	265.498	206.682	307.961	448.835	483.766	485.152	498.162	431.377	414.794	446.261	475.735	444.425	388.294	462.334	420.433	439.323	512.432	520.415	446.265	405.918	463.431	Predicted protein
Phatr3_EG02182	787.916	819.443	553.532	746.409	839.232	741.955	1090.05	1095.92	1078.43	1031.1	1098.72	1073.46	1109.81	1154.18	1220.23	962.693	1116.1	1062.41	628.783	874.915	848.119	734.925	635.935	633.8	964.194	1070.88	1032.47	700.706	682.371	726.514	NA
Phatr3_J42546	345.358	342.779	371.635	251.042	287.446	306.721	128.877	80.6874	169.081	153.621	161.946	172.458	384.997	352.349	418.995	454.021	380.023	377.496	489.927	488.494	512.311	560.776	493.816	581.583	349.32	326.284	386.654	582.431	534.411	543.368	Predicted protein
Phatr3_J42547	1019.14	1002.53	857.74	922.726	1047.19	1090.66	466.319	469.825	601.538	503.444	441.995	506.815	731.69	587.566	532.407	725.173	629.947	728.997	617.43	570.517	709.632	837.414	831.122	839.965	334.171	401.58	496.38	882.592	737.857	935.969	Predicted protein
Phatr3_J42548	154.638	151.629	188.17	175.477	170.065	141.366	250.868	247.169	226.525	222.918	223.682	212.933	212.141	159.986	158.567	227.011	207.7	222.655	281.206	363.636	296.887	329.966	295.93	329.504	254.861	260.399	217.362	293.203	280.347	366.293	Predicted protein
Phatr3_J17259	558.169	542.801	540.988	495.367	494.481	515.77	3783.68	4223.32	3782.64	3162.6	3104.7	2655.5	727.761	950.391	957.703	850.239	894.708	1040.94	334.478	458.419	438.994	228.31	259.051	215.168	928.549	771.786	792.118	277.301	256.011	285.344	Regulatory proteasome non-atpase subunit 8	RPN8
Phatr3_J3062	363.03	367.782	318.32	393.775	337.357	358.126	272.512	323.771	268.795	316.427	315.839	244.609	202.32	182.841	183.77	189.175	205.418	178.576	388.623	303.486	319.516	268.306	278.84	353.812	269.119	207.065	246.623	301.155	260.878	279.273	Histone acetyltransferase	MYST
Phatr3_J17265	231.22	271.804	285.391	486.971	362.312	437.805	224.306	207.336	195.093	224.588	207.577	177.737	55.9816	30.4735	38.8542	34.6822	34.2363	31.6464	32.3125	41.923	47.0674	39.9959	28.7835	43.2136	26.7337	46.0143	35.5304	25.8416	48.6713	47.5574	NA
Phatr3_J9546	223.857	231.477	180.329	298.06	207.959	269.023	84.6065	105.2	87.792	87.6644	76.0518	91.5083	108.035	61.8992	106.061	42.039	50.2132	72.3346	111.784	89.3142	94.1349	51.6614	50.3711	49.5156	126.539	143.272	147.347	35.7807	62.2992	35.415	Predicted protein
Phatr3_J42552	391.013	352.457	611.551	332.484	355.842	368.407	305.961	350.326	340.329	355.667	348.944	362.514	380.086	459.959	482.002	546.507	562.616	570.765	655.855	601.504	615.497	584.107	611.649	540.17	522.198	513.478	613.421	539.693	641.487	603.068	Predicted protein
Phatr3_EG01787	31.6639	45.9727	0	15.9525	15.7125	41.9813	25.5787	48.0039	49.8572	26.7168	48.3153	42.2346	16.6963	7.61837	5.25056	31.5292	26.2478	14.693	12.2263	4.55685	5.43086	12.4987	14.3917	17.1054	11.5846	4.18312	8.36009	12.9208	8.76083	22.2609	NA
Phatr3_J83	601.614	662.168	148.968	518.876	475.996	575.744	617.824	715.973	741.355	616.991	618.256	710.949	202.32	190.459	219.474	386.759	348.069	391.059	207.848	218.729	175.598	319.134	329.211	265.584	170.204	132.814	130.626	312.088	288.134	294.451	Predicted protein
Phatr3_J31571	288.657	304.872	903.214	345.078	382.645	339.278	189.873	121.542	179.919	183.678	199.524	181.257	64.8209	77.136	71.4077	120.862	118.686	92.6787	105.67	87.4915	83.2732	141.652	175.399	101.732	60.5963	66.93	80.4658	128.214	94.4223	91.0673	Predicted protein
Phatr3_J42555	276.139	267.771	32.9297	246.844	221.823	263.026	776.215	1075.49	781.457	684.618	654.94	700.39	369.282	474.243	405.344	341.567	407.412	386.538	496.913	498.519	432.658	430.789	406.566	405.128	581.012	467.464	541.316	397.564	387.423	407.779	Predicted protein
Phatr3_J42556	118.556	146.79	32.9297	115.865	166.368	173.066	106.25	81.7087	141.985	126.905	151.209	163.659	319.194	303.782	358.089	284.814	303.562	400.101	591.231	634.313	611.877	644.101	656.623	597.789	511.504	559.493	556.991	586.407	611.311	570.688	Predicted protein
Phatr3_J42557	223.857	214.539	92.5167	134.337	196.868	160.214	199.711	303.344	231.944	311.417	366.838	358.994	219.016	325.685	282.48	318.445	300.138	423.836	583.371	601.504	529.509	629.936	625.141	516.763	509.722	370.206	412.779	574.48	679.451	592.949	Predicted protein
Phatr3_J5762	148.747	171.793	134.855	149.45	173.762	149.933	523.38	516.808	473.643	505.949	566.362	401.229	221.962	208.553	212.123	197.583	197.429	198.92	144.969	155.844	133.056	139.986	158.309	150.347	75.7454	140.135	110.771	170.952	177.163	134.577	Predicted protein
Phatr3_J42559	776.871	818.637	1594.74	653.213	845.702	660.563	914.931	893.689	854.075	904.196	863.412	798.938	927.135	867.541	973.455	1106.68	975.734	991.21	864.576	1175.67	949.495	1065.72	976.839	1033.53	905.38	972.576	1053.37	998.879	931.568	995.669	Predicted protein
Phatr3_J42560	265.093	250.834	139.559	256.08	292.068	291.299	348.264	375.86	287.221	320.601	350.733	337.877	246.516	325.685	273.029	301.63	311.55	309.682	529.226	557.758	481.536	607.438	569.373	508.66	630.023	568.905	598.791	531.742	446.802	563.605	Predicted protein	PTBZIP12
Phatr3_J31578	192.929	206.474	269.71	173.798	193.171	186.774	317.766	283.938	331.659	259.654	261.26	228.771	471.424	463.768	484.102	554.915	551.204	435.138	253.26	240.602	271.543	310.802	293.232	329.504	327.933	484.196	299.918	338.923	395.211	418.909	Predicted protein
Phatr3_J42561	306.33	306.485	43.9063	280.428	305.007	285.302	153.472	120.52	198.345	121.895	133.314	147.821	126.695	101.896	53.5558	152.391	114.121	100.59	91.6975	69.2641	102.281	161.65	170.002	166.553	55.2496	48.1059	59.5656	169.958	161.589	155.826	Predicted protein
Phatr3_J17276	1402.79	1296.11	3879.43	1453.36	1379.93	1232.88	1123.5	1091.83	1190.07	1087.04	1171.2	1164.97	1149.1	1138.95	1271.69	1144.51	1054.48	1022.86	1007.8	976.077	1041.82	984.066	1019.11	1014.62	906.271	1048.92	899.754	1023.73	979.266	1086.74	Predicted protein	SKP1_1
Phatr3_J42563	311.485	331.487	337.137	321.569	350.296	311.004	182.986	172.61	198.345	162.805	214.735	242.849	249.462	215.219	212.123	217.552	208.841	203.441	344.084	338.118	342.144	399.126	338.206	336.706	301.199	329.421	292.603	384.643	367.955	402.72	Predicted protein
Phatr3_J42564	518.405	695.236	440.631	1127.59	1324.47	1301.42	393.519	338.07	334.91	443.332	419.627	473.379	349.64	397.107	420.045	426.696	531.803	438.528	190.381	249.715	209.088	329.966	326.512	351.111	253.97	283.407	297.828	389.612	358.221	386.53	Predicted protein
Phatr3_J42565	724.588	674.266	402.997	621.308	743.109	691.406	236.111	201.208	315.401	258.819	252.313	337.877	963.474	931.345	957.703	1009.99	1012.25	1023.99	932.695	1084.53	1116.04	1346.53	1261.08	1313.51	847.457	946.431	959.32	1133.06	1047.41	1311.37	Predicted protein
EPrPhatr3G00000013101	0.73637	0.806539	0	2.51881	0.924264	2.57028	10.8218	6.12815	0	10.8537	2.68418	7.0391	1.96427	5.71377	1.05011	6.30585	3.42363	1.13023	5.23986	0.911369	0	2.49974	0	0	4.45561	1.04578	1.04501	0.993909	0.973426	7.08301	NA
Phatr3_J31584	99.41	95.1716	94.0848	85.6397	127.548	109.665	895.255	1090.81	973.299	804.843	758.729	654.636	235.712	348.54	337.086	273.253	330.951	280.297	601.71	691.729	477.01	756.589	790.646	481.652	777.058	612.827	662.537	575.474	819.624	786.214	Predicted protein
Phatr3_J42566	10884.3	10731	27021.2	10440.5	10142	9786.79	50701.9	53634.6	41781.4	39009.8	38293.4	33761.3	18717.5	24055	26626.7	19238.1	19470.2	20601.8	7111.36	10035.1	9692.27	7520.06	7890.27	7734.34	11099.8	10463	10691.5	8616.2	8869.85	9316.18	Predicted protein
Phatr3_J42567	714.279	719.432	1110.2	803.502	681.183	830.202	672.917	678.182	824.811	779.796	840.149	844.692	245.534	254.263	254.127	224.909	277.314	305.162	437.528	366.371	392.832	473.285	423.657	388.923	294.961	278.178	224.677	412.472	319.284	355.162	Beta-glucan elicitor receptor	BGER1
Phatr3_EG02435	233.429	197.602	73.6998	199.826	198.717	217.617	479.109	406.501	331.659	346.483	305.102	311.48	1501.68	1321.79	1230.73	1271.68	1351.19	1022.86	797.332	718.159	935.918	1174.05	811.334	997.515	1339.36	1538.34	1152.65	1186.73	1405.63	1418.63	Predicted protein
Phatr3_EG02436	33.873	32.2615	53.3147	75.5644	48.986	71.1112	108.218	87.8369	82.3727	146.942	127.946	139.022	35.3568	51.424	37.8041	69.3643	114.121	105.111	27.0726	27.3411	9.95657	20.8312	22.4871	38.7122	35.6449	37.6481	71.0607	51.6833	60.3524	43.5099	Predicted protein
Phatr3_J42570	635.487	604.097	490.809	346.757	662.698	584.311	984.78	1182.73	1035.08	1174.7	1293.78	1237.12	1398.56	1620.81	1573.07	1934.84	1965.16	2264.98	4082.72	3696.51	3680.31	4917.83	4592.76	4002.66	2705.45	1975.48	2217.51	4271.82	4111.75	4258.91	Predicted protein
Phatr3_EG02165	918.99	851.705	1532.01	676.722	1037.02	784.793	520.428	527.021	503.991	408.266	431.258	457.541	1777.66	2127.43	2090.77	2071.47	2219.65	2018.59	1852.29	2093.42	1996.75	2199.78	2378.23	1920.31	1530.06	1722.4	1562.29	2292.95	2529.93	2679.4	NA
Phatr3_EG02170	212.811	188.73	252.461	166.242	194.096	179.063	38.3681	53.1107	34.6833	22.5423	29.526	35.1955	88.3921	81.8974	81.9088	124.015	75.3198	101.721	331.858	264.297	263.397	393.293	375.984	315.099	192.482	148.501	172.427	240.526	305.656	333.913	Ubiquitin carboxyl-terminal hydrolase
Phatr3_EG02437	421.204	405.689	636.641	475.216	561.028	428.381	780.151	656.734	670.904	791.485	800.781	689.832	610.887	624.706	603.815	602.209	636.795	678.137	807.811	801.094	753.079	874.077	885.091	726.529	594.378	671.391	632.231	742.45	868.296	858.056	N-acetyl transferase
Phatr3_J9444	736.37	671.04	795.017	466.82	521.285	541.473	443.692	300.28	402.109	323.106	321.207	288.603	500.888	491.385	427.396	548.609	442.789	454.352	578.131	503.076	557.568	571.608	572.071	665.31	387.638	499.883	534	626.163	600.604	611.163	Predicted protein
Phatr3_J42574	2419.71	2336.54	1640.21	1600.29	1803.24	1990.26	968.056	784.404	1029.66	763.098	722.045	742.625	2111.59	1531.29	1336.79	1555.44	1374.02	1304.28	1824.34	1681.48	1885.41	1519.01	1515.63	1818.57	1694.91	2391.7	2491.31	1775.12	1662.61	1995.39	Predicted protein
Phatr3_J31594	186.302	177.439	98.7891	194.788	163.595	192.771	112.153	157.289	122.475	128.575	107.367	139.022	102.142	132.369	72.4578	124.015	84.4495	114.153	111.784	124.858	124.005	110.822	142.118	157.55	63.2697	76.342	54.3406	119.269	132.386	120.411	Predicted protein
Phatr3_J3211	320.321	333.1	246.189	366.907	390.964	423.24	211.516	209.379	179.919	219.579	205.787	230.53	168.927	161.89	157.517	141.882	91.2967	115.283	160.689	131.237	127.625	78.3253	88.1494	115.236	212.978	171.508	166.157	93.4275	69.1132	74.8775	Predicted protein
Phatr3_J42576	94.9917	120.981	370.067	99.913	161.746	121.66	71.8171	61.2815	44.4379	73.4711	62.6309	89.7485	81.5171	43.8056	59.8564	32.5802	30.8126	35.0371	26.1993	36.4548	49.7829	36.6629	17.0902	35.1111	48.1206	35.5565	50.1605	26.8356	36.0167	13.1542	Predicted protein
Phatr3_J42577	1700.28	1698.57	633.504	1748.9	1680.31	1875.45	1314.35	1460.54	1688.64	1868.5	1804.66	1606.67	2583.99	2863.55	2711.39	3242.26	3413.36	3729.75	1812.99	2114.38	2172.34	3117.18	2673.26	2627.93	2354.34	2226.47	2293.8	3436.94	3393.36	3313.84	Predicted protein
Phatr3_J42578	114.874	125.013	181.897	133.497	93.3507	98.5276	130.845	124.606	139.817	101.023	116.315	68.6312	98.2134	99.9911	79.8086	83.027	97.0028	96.0694	119.643	125.769	112.238	108.322	98.9432	84.6267	119.41	155.821	152.572	84.4823	94.4223	78.925	NA
Phatr3_J31599	452.131	418.594	445.335	464.302	472.299	518.341	180.035	194.058	204.848	158.631	143.156	179.497	410.532	426.629	421.095	378.351	302.42	344.72	332.731	334.473	311.369	397.459	348.1	371.817	414.372	546.943	475.48	334.947	360.167	412.838	Succinate semialdehyde dehydrogenase	SSDH
Phatr3_J9321	396.167	384.719	122.31	320.729	313.326	337.564	312.847	250.233	268.795	295.554	288.997	276.285	285.801	351.397	287.731	340.516	294.432	377.496	709.127	613.352	648.988	714.927	640.432	631.999	517.742	509.295	525.64	608.273	622.019	615.21	Predicted protein
Phatr3_EG01858	208.393	221.798	498.65	195.628	203.338	191.915	235.127	257.382	244.951	227.928	206.682	211.173	568.656	593.28	621.667	459.276	485.014	380.887	504.773	477.558	441.71	286.637	245.559	236.775	575.665	670.345	605.061	300.161	351.407	321.771	NA
Phatr3_J51305	8062.52	6593.45	14512.6	5027.55	6751.75	5916.79	431.887	321.728	479.063	542.685	488.521	536.731	57400.8	55380.8	52566.6	50688.5	48007.2	44259.7	26267.4	34766	37475.6	32678.3	25965.4	33526.6	48960.9	70970.9	61836.4	34690.4	37464.2	44049.2	Predicted protein	CA
Phatr3_J42584	974.954	965.427	1441.07	818.615	839.232	776.226	356.134	361.561	399.941	416.615	460.784	461.061	631.512	658.036	636.368	795.588	778.305	819.415	1226.13	1110.96	1116.04	1429.85	1349.22	1280.2	917.856	703.81	816.153	1354.7	1294.66	1300.24	Predicted protein	CDC6
Phatr3_EG02197	226.066	209.7	616.256	209.062	191.323	174.779	157.407	120.52	173.416	168.65	195.945	230.53	153.213	153.32	144.916	141.882	112.98	127.716	222.694	210.526	219.045	234.976	232.067	191.76	173.769	222.751	202.732	209.715	178.137	206.419	Predicted protein
Phatr3_EG02191	100.146	108.883	144.263	157.846	149.731	157.644	150.521	165.46	143.068	104.362	104.683	130.223	39.2854	39.0441	71.4077	33.6312	17.1181	29.3859	29.6925	30.0752	25.344	8.33248	13.4922	17.1054	43.665	40.7854	35.5304	14.9086	31.1496	25.2965	NA
Phatr3_J42585	47.1277	55.6512	144.263	61.2912	68.3956	57.403	114.12	93.965	126.811	112.711	101.999	114.385	48.1246	61.8992	53.5558	40.988	70.755	88.1578	202.608	186.831	136.677	129.153	106.139	138.644	110.499	102.486	106.591	144.117	131.412	144.696	Predicted protein
Phatr3_J42586	109.719	112.109	150.536	253.561	108.139	130.228	846.065	932.501	912.603	840.744	810.623	828.854	55.9816	44.7579	55.656	32.5802	47.9308	13.5627	70.7381	47.3912	40.7314	43.3289	72.8581	49.5156	53.4673	58.5637	61.6556	24.8477	67.1664	64.7589	Predicted protein
Phatr3_J42587	486.004	441.983	244.621	413.925	386.343	412.102	547.975	568.897	599.37	496.765	466.153	619.441	514.638	537.095	584.913	580.138	523.815	552.682	827.024	738.209	811.008	789.086	711.491	657.207	1008.75	821.984	784.803	734.499	668.743	795.321	Predicted protein
Phatr3_J42588	525.768	483.117	468.856	438.274	469.526	490.924	738.831	726.186	688.246	583.595	600.362	637.038	882.939	877.064	792.835	953.234	942.639	817.155	865.45	897.699	891.566	834.081	823.927	870.575	908.053	1025.91	935.285	851.78	794.315	983.527	Predicted protein
Phatr3_J17300	515.459	502.474	73.6998	457.585	469.526	542.33	411.227	402.415	494.236	379.879	374.891	445.223	805.35	781.835	824.339	722.02	687.008	978.778	936.188	1103.67	1093.41	1184.05	1133.35	1098.35	872.409	827.212	927.97	1243.38	1131.12	1247.62	Lissencephaly-1 homolog
Phatr3_J42590	1192.18	1217.87	1309.35	1009.21	1081.39	1119.79	598.148	509.658	577.693	505.949	611.993	693.351	1223.74	976.103	831.689	1120.34	967.745	1091.8	1291.62	1301.44	1354.09	1444.02	1408.59	1552.99	785.079	1156.63	1194.45	1406.38	1396.87	1527.91	Predicted protein
Phatr3_J42591	310.748	296	482.969	252.721	265.264	286.158	260.706	269.639	265.544	284.701	265.734	223.491	225.891	298.069	292.982	292.171	287.585	331.157	353.69	380.041	358.437	350.797	350.798	352.911	327.042	323.146	361.574	355.82	399.105	340.996	Predicted protein
Phatr3_J42592	424.149	413.754	329.297	375.303	379.873	407.818	552.894	550.512	523.5	537.675	507.31	388.91	428.21	492.337	411.644	502.366	498.708	496.17	690.788	665.3	663.47	751.59	727.682	731.031	684.382	647.338	625.961	718.596	676.531	708.301	Predicted protein
Phatr3_J42593	363.03	375.847	269.71	433.236	371.554	419.813	365.972	363.604	405.361	448.341	494.784	462.821	283.837	329.494	325.535	421.441	382.305	526.686	303.038	344.498	288.741	442.455	473.128	414.131	289.615	221.705	311.413	479.064	447.776	456.348	Predicted protein
Phatr3_J42594	66.2733	61.2969	14.1127	89.8377	73.0169	66.8274	43.287	33.7048	58.528	76.8107	50.9994	56.3128	39.2854	19.0459	33.6036	34.6822	29.6714	31.6464	52.3986	46.4798	49.7829	46.6619	52.17	65.7207	31.1893	40.7854	37.6204	53.6711	57.4321	46.5455	Predicted protein
Phatr3_J42595	208.393	272.61	286.959	277.07	241.233	328.14	126.91	99.0718	133.314	144.438	111.841	139.022	120.802	62.8515	72.4578	54.6507	31.9539	15.8232	81.2178	70.1754	57.024	32.4967	48.5721	54.017	87.33	102.486	99.276	69.5737	42.8307	31.3676	Predicted protein
Phatr3_J31617	196.611	210.507	274.414	184.713	218.126	178.206	179.051	207.336	207.016	229.597	227.261	232.29	195.445	228.551	231.025	262.744	271.608	316.464	423.555	401.003	362.962	446.621	446.144	363.715	167.531	180.92	174.517	415.454	440.962	516.048	Predicted protein
Phatr3_J42596	363.03	347.618	249.325	314.012	351.22	313.575	334.491	352.369	305.646	396.577	361.47	360.754	359.461	341.874	328.685	330.006	351.492	368.454	557.171	496.696	506.88	474.118	550.484	439.339	574.774	533.348	501.605	458.192	466.271	478.609	Predicted protein
Phatr3_J31619	318.112	316.97	148.968	411.406	355.842	364.98	462.384	518.85	627.55	715.509	698.782	871.088	298.569	243.788	233.125	444.562	415.4	541.379	31.4391	14.5819	19.9131	44.9954	43.1752	40.5128	32.0804	33.465	21.9452	73.5493	73.9803	63.7471	Predicted protein
Phatr3_J31620	650.215	689.591	431.222	664.128	627.576	582.598	820.486	877.347	847.572	1068.67	1088.88	1260	805.35	805.642	926.2	1007.88	1068.17	1124.58	358.93	488.494	464.338	440.788	447.043	461.846	421.501	447.594	471.3	465.15	512.995	503.906	Predicted protein
Phatr3_EG01797	308.539	266.964	249.325	248.523	244.93	294.726	345.313	379.946	345.749	298.894	259.471	290.363	298.569	294.259	297.182	320.547	342.363	340.199	291.685	253.361	238.053	304.136	275.242	293.493	171.987	216.477	204.822	323.021	298.842	288.38	NA
Phatr3_J974	469.068	394.397	297.935	382.02	333.659	424.954	1524.88	1730.18	1570.5	1382.59	1356.41	1177.29	794.547	1136.09	1162.48	918.552	1166.32	1144.92	1180.71	1172.93	982.08	1181.55	1203.51	954.301	1497.98	1098.07	1116.07	1196.67	1132.09	1124.17	NA
Phatr3_J17304	423.413	446.016	272.846	301.418	400.206	345.275	1234.66	1184.78	1372.16	1203.92	1244.57	1483.49	1594.99	1709.37	1619.27	2013.67	1982.28	2355.4	1875.87	1870.13	1948.77	2461.41	2509.56	2656.74	1191.43	1455.73	1686.65	2597.09	2440.38	2575.18	NA
Phatr3_J9283	312.221	339.553	318.32	314.852	374.327	330.71	386.632	329.899	396.69	374.87	405.311	351.955	368.3	359.968	343.387	428.798	397.141	439.659	757.159	756.437	707.822	750.757	679.11	712.125	710.224	689.169	686.572	675.858	678.478	681.993	Predicted protein
Phatr3_J42600	1488.2	1843.75	2256.47	1685.93	1835.59	1721.23	2057.12	2050.89	1821.96	1829.26	1757.24	1809.05	2224.53	2180.76	2654.69	2004.21	2320.08	2141.78	1668.89	1789.02	1789.47	1496.51	1551.61	1599.8	2357.02	1897.05	1874.75	1790.03	1615.89	1557.25	Predicted protein
Phatr3_J31625	238.584	275.03	362.227	256.919	267.112	213.334	236.111	187.93	208.1	229.597	255.892	299.162	294.64	239.026	270.929	307.936	314.974	396.71	463.727	496.696	447.141	500.782	489.319	433.937	335.062	267.72	277.973	461.174	388.397	421.945	Predicted protein
Phatr3_J9653	563.323	571.029	1458.31	639.779	661.773	665.704	458.449	515.786	429.205	466.709	479.574	425.865	489.103	476.148	430.546	449.817	416.541	460.003	565.031	595.124	620.928	512.448	473.128	513.162	678.144	713.222	656.267	454.217	442.909	530.214	Predicted protein
Phatr3_J24439	659.788	650.877	796.585	665.807	659.925	627.149	658.16	679.204	624.299	603.632	604.836	728.547	710.083	720.888	768.683	817.658	733.797	827.327	715.24	678.97	627.264	764.089	739.375	704.922	771.712	780.152	748.228	720.584	790.422	818.594	Predicted protein
Phatr3_J42603	150.22	202.441	208.555	172.119	238.46	196.198	6.88657	10.2136	3.25156	8.34899	10.7367	1.75977	744.458	915.156	858.992	733.58	663.042	771.946	2147.47	2683.07	2389.58	1592.34	1688.33	1346.82	2839.11	3219.96	3286.56	1476.95	1733.67	1694.86	Predicted protein
Phatr3_J42604	353.458	441.983	699.364	858.076	800.413	735.958	290.22	242.062	240.615	278.022	241.576	253.408	213.123	216.171	274.079	224.909	240.795	134.497	298.672	365.459	363.868	219.978	235.665	194.461	482.988	562.63	663.582	191.825	238.489	222.609	Predicted protein
Phatr3_J42605	527.241	547.64	1019.25	540.706	573.968	518.341	526.331	556.641	485.566	555.208	596.783	549.05	1348.47	1521.77	1790.44	973.203	1073.88	943.74	1576.32	2290.27	1673.61	705.761	630.538	593.287	5974.08	4950.73	5330.6	753.383	828.385	735.621	Predicted protein
Phatr3_EG01879	214.284	191.15	167.785	198.147	234.763	250.174	296.123	230.827	249.286	289.71	279.155	311.48	690.44	605.66	632.168	703.102	653.913	687.179	634.896	585.099	772.087	795.752	725.883	838.164	303.873	408.9	436.814	697.724	695.026	881.329	NA
Phatr3_J42606	579.523	513.765	901.646	526.432	550.862	541.473	187.905	136.862	203.764	194.532	163.735	181.257	282.855	165.699	119.713	229.113	151.781	142.409	289.065	215.995	276.974	264.14	290.533	313.299	141.688	173.6	200.642	243.508	255.038	303.558	Predicted protein
Phatr3_J8167	470.541	386.332	918.895	450.028	525.906	363.267	290.22	305.386	244.951	323.106	282.734	276.285	731.69	919.918	1008.11	866.003	988.287	749.341	424.428	519.481	542.181	445.788	398.471	337.606	857.259	814.663	709.562	477.076	523.703	510.989	Thioredoxin m	TRX-M
Phatr3_J31632	465.386	524.25	330.865	368.587	524.058	412.102	1843.63	2000.84	1650.71	1699.86	1619.46	1414.86	3235.15	4234.86	4669.85	1361.01	1315.81	1400.35	6283.46	9035.32	7633.98	1236.54	1165.73	1155.06	18207.4	15947.1	16348.1	1316.93	1310.23	1402.44	Predicted protein
Phatr3_J9123	393.222	479.084	323.025	382.02	374.327	356.413	394.502	357.476	435.708	490.086	447.364	459.301	353.568	326.637	330.786	386.759	393.717	426.096	459.361	350.877	397.358	508.281	536.092	482.552	392.094	300.139	312.458	488.009	534.411	508.965	Predicted protein
Phatr3_J42608	113.401	137.918	89.3806	113.347	145.11	141.366	356.134	345.219	231.944	367.356	355.207	323.798	68.7494	66.6607	75.6081	129.27	144.934	134.497	33.1858	56.5049	46.1623	60.8271	69.2602	92.7292	26.7337	34.5108	33.4403	73.5493	62.2992	53.6285	Predicted protein
Phatr3_J42609	191.456	210.507	202.282	205.703	225.521	192.771	180.035	183.845	183.171	191.192	175.367	183.017	124.731	146.654	170.118	187.074	182.593	180.836	214.834	199.59	199.131	239.142	243.76	230.473	203.176	162.096	235.127	256.429	221.941	241.834	Predicted protein
Phatr3_EG02202	0	0	0	0	0	0	0	0	0	0	0	0	0	0	0	0	0	0	0	0	0	0	0	0	0	0	0	0	0	0	Predicted protein
Phatr3_EG02185	0	0	0	0	0	0	0	0	0	0	0	0	0	0	0	0	0	0	0	0	0	0	0	0	0	0	0	0	0	0	NA
Phatr3_J8835	672.306	589.58	1693.53	777.474	722.775	831.059	545.023	489.231	490.985	541.85	514.468	441.703	421.336	419.01	429.496	499.213	438.224	411.403	280.332	188.653	246.199	230.81	213.178	261.082	186.245	259.354	210.047	206.733	188.845	194.277	Precursor of cyclase lycopene beta cyclase	LCYB
Phatr3_J42611	469.804	444.403	525.307	389.577	442.723	377.832	112.153	82.7301	114.888	144.438	150.314	144.301	344.729	324.733	303.483	487.652	439.365	369.585	337.971	360.902	347.575	514.947	490.218	463.646	188.027	200.79	186.012	470.119	430.254	483.668	Predicted protein
Phatr3_J42612	10529.4	10149.5	7489.15	8219.73	8768.5	8736.4	4051.27	3917.93	4242.2	4745.57	4669.58	5374.35	7947.43	7829.78	8027.06	9563.87	9257.49	9978.78	5922.78	8167.69	7338	6538.5	6058.92	6633.29	11599.7	10297.8	10618.4	6631.36	6746.81	7156.88	Predicted protein
Phatr3_J42613	151.692	129.853	75.2679	151.968	99.8206	115.663	70.8333	105.2	95.379	98.5181	85.8938	84.4692	110.981	121.894	100.811	120.862	82.167	91.5485	116.15	75.6437	95.04	46.6619	51.2705	57.6182	81.0921	94.1203	88.8259	58.6407	44.7776	47.5574	Predicted protein
Phatr3_J42614	494.841	534.735	470.424	476.056	413.146	451.513	378.762	441.227	438.96	384.054	354.312	351.955	277.944	261.881	260.428	280.61	270.467	231.697	349.324	298.929	210.898	271.639	289.634	234.974	330.606	231.118	198.552	239.532	271.586	269.154	Predicted protein
Phatr3_J3241	865.971	821.863	821.674	868.152	807.807	893.602	2049.25	2226.56	1984.53	2021.29	2031.93	1640.11	689.458	879.921	845.341	797.69	899.273	1079.37	574.638	589.656	514.121	513.281	539.69	574.381	778.841	763.42	830.784	604.297	560.693	578.783	NA
Phatr3_J42616	393.222	375.04	642.913	329.965	268.961	345.275	344.329	372.796	393.438	358.172	337.312	362.514	245.534	219.98	144.916	165.003	212.265	214.743	213.961	159.49	157.495	229.143	185.294	189.06	199.611	133.86	134.806	226.611	204.419	185.17	Predicted protein
Phatr3_J9327	528.714	579.095	156.808	563.375	561.028	691.406	101.331	104.179	130.062	123.565	114.525	163.659	622.673	714.222	608.015	451.919	382.305	413.663	2471.47	3141.49	2861.16	833.248	694.401	740.033	4208.77	4531.37	5308.65	742.45	704.76	934.957	Protein translocase subunit SecA	SECA
Phatr3_EG01793	4.41822	4.83923	0	2.51881	3.69706	0	1.96759	8.17087	2.1677	10.8537	5.36836	14.0782	0.982134	4.76148	1.05011	4.2039	6.84725	3.39068	14.8463	9.11369	3.62057	11.6655	6.29638	12.604	3.56449	6.27468	4.18004	6.95737	12.6545	9.10673	NA
Phatr3_J17324	0	0	0	0	0	0	0	0	0	0	0	0	0	0	0	0	0	0	0	0	0	0	0	0	0	0	0	0	0	0	40S ribosomal protein S4
Phatr3_J9199	2948.43	2705.13	5237.39	2460.04	2658.18	2440.06	3751.22	3792.31	3538.78	3775.42	4070.11	4443.43	4082.73	3727.29	3721.6	4220.72	3698.66	3934.32	3045.23	3802.23	3741.86	3992.92	3675.29	4053.08	3088.63	3620.49	3379.56	3700.32	3909.28	4172.9	Predicted protein
Phatr3_J42619	276.875	265.351	203.85	361.87	361.387	386.399	590.278	548.47	521.333	597.788	500.152	503.295	239.641	165.699	181.67	221.756	241.936	186.488	55.0185	47.3912	41.6366	46.6619	71.0592	111.635	46.3383	49.1517	55.3856	85.4762	95.3957	89.0436	Predicted protein
Phatr3_J17326	134.019	116.948	26.6574	101.592	84.1081	120.803	51.1574	36.7689	79.1212	51.7638	68.894	56.3128	25.5355	9.52296	19.9521	106.148	104.991	103.981	0	0	0	7.49923	4.49742	11.7037	0	0	1.04501	18.8843	5.84055	17.2016	Early light induced protein	LHL1
Phatr3_EG01749	4.41822	9.67846	0	0	0.924264	5.99733	2.95139	3.06408	3.25156	0.834899	2.68418	1.75977	0.982134	0	0	3.15292	6.84725	4.52091	0	0	0	4.16624	0	0.900284	0	0	0	0.993909	2.92028	1.01186	NA
Phatr3_J31649	340.203	305.678	280.686	369.426	350.296	349.559	212.5	219.592	236.28	174.494	214.735	174.218	273.033	233.312	253.077	234.367	224.818	201.181	209.594	182.274	192.795	169.149	183.495	214.268	75.7454	117.127	104.501	182.879	199.552	161.897	Predicted protein
Phatr3_J31650	377.022	352.457	216.395	579.327	409.449	511.487	165.278	156.268	140.901	202.046	182.524	209.413	102.142	62.8515	100.811	99.8426	86.7319	107.372	99.5573	59.239	76.9372	112.488	101.642	142.245	85.5477	96.2118	89.8709	96.4092	83.7146	83.9843	Solute carrier
Phatr3_J41659	427.095	439.564	196.01	261.957	500.027	407.818	726.042	828.322	764.116	727.197	788.255	781.34	1574.36	1981.73	1707.48	2236.47	2220.79	2339.57	2682.81	3034.86	2695.52	4224.57	3589.84	3851.41	1577.29	1937.83	2063.9	3820.59	3672.73	3977.62	Predicted protein
Phatr3_J31652	408.685	342.779	134.855	364.389	301.31	317.002	602.083	634.264	538.674	518.473	457.206	540.251	244.551	265.691	328.685	558.068	594.57	560.593	94.3174	111.187	107.712	154.984	165.505	115.236	126.539	163.142	104.501	155.05	172.296	192.253	Predicted protein
Phatr3_J17332	1054.48	952.522	1798.59	1020.12	1048.12	976.708	1800.35	1914.03	1761.26	1821.75	1842.24	1844.24	1483.02	1780.79	1855.55	1759.33	1683.28	1747.33	1778.93	1976.76	1820.24	1579.84	1606.48	1425.15	2749.11	2481.64	2220.65	1529.63	1653.85	1731.29	Predicted protein
Phatr3_J4761	206.184	193.569	279.118	143.572	128.473	127.657	214.468	180.781	131.146	128.575	126.157	154.86	175.802	208.553	202.672	135.576	134.663	143.539	147.589	174.072	160.21	139.986	149.314	144.045	174.66	188.241	169.292	108.336	152.828	150.767	Predicted protein
Phatr3_J42624	1173.77	1200.13	1787.61	1134.31	1026.86	1047.82	1777.72	2006.97	1877.23	1665.62	1655.25	1567.96	928.117	859.923	981.856	955.336	885.578	991.21	909.115	802.916	803.767	794.919	848.213	891.281	808.248	742.504	731.508	909.427	879.003	814.546	Predicted protein
Phatr3_J42625	516.932	458.114	471.992	479.414	439.026	529.479	1951.85	2157.11	1932.51	1557.09	1449.46	1506.37	726.779	771.36	718.277	704.153	602.558	683.788	620.923	652.541	667.996	480.784	519.901	573.481	833.199	825.121	864.224	546.65	465.297	498.846	Predicted protein
Phatr3_J31657	4.41822	0.806539	0	4.19802	0	2.57028	0.983796	4.08544	8.67082	5.0094	2.68418	7.0391	0	0.952296	4.20045	2.10195	2.28242	2.26046	8.73309	3.64548	0	1.6665	0.899483	0	2.67337	0	2.09002	0	1.94685	1.01186	Predicted protein
Phatr3_J31658	56.7005	74.2016	59.5871	45.3387	78.5625	47.1219	64.9306	77.6233	55.2764	67.6269	71.5782	80.9496	126.695	97.1342	136.515	74.6192	76.461	72.3346	145.843	175.894	162.926	116.655	121.43	99.0312	180.007	152.684	173.472	104.36	103.183	102.198	Predicted protein
Phatr3_J42626	320.321	382.299	297.935	290.503	381.721	366.694	294.155	226.742	270.963	303.068	357.891	286.843	412.496	438.056	399.043	489.754	432.518	535.728	1033.13	1013.44	965.788	1220.71	1231.39	1011.92	715.571	603.415	649.997	972.043	1100.94	967.337	Predicted protein
Phatr3_J17335	153.901	173.406	206.987	153.648	201.49	193.628	165.278	150.14	114.888	151.952	147.63	202.374	374.193	442.818	387.492	421.441	435.942	488.259	481.194	575.074	496.924	625.769	555.881	562.677	547.149	636.88	652.087	662.938	458.483	600.032	Predicted protein
Phatr3_J3851	227.538	204.861	239.916	329.125	368.781	354.699	1343.87	1378.83	1070.85	1290.75	1287.51	1522.2	390.889	544.713	550.259	477.143	668.748	620.495	227.06	417.407	310.464	285.804	274.342	254.78	540.911	515.57	548.631	299.167	362.114	323.795	Predicted protein
Phatr3_J31662	254.784	230.67	290.095	204.024	184.853	199.625	41.3194	42.8971	75.8696	69.2967	83.2096	91.5083	191.516	150.463	169.068	168.156	182.593	167.274	180.775	207.792	176.503	309.135	303.126	304.296	13.3668	62.7468	41.8004	228.599	271.586	260.048	Predicted protein	DGAT2C
Phatr3_J31663	276.139	258.092	239.916	258.598	271.734	277.591	118.056	107.243	121.391	143.603	161.051	209.413	137.499	62.8515	73.5079	142.933	76.461	92.6787	132.743	105.719	112.238	133.32	160.108	162.051	44.5561	59.6095	37.6204	150.08	144.067	123.447	Predicted protein
Phatr3_J8877	142.119	167.76	31.3616	167.921	156.201	148.22	120.023	123.584	135.481	111.877	115.42	142.542	201.337	217.123	189.02	203.889	186.017	179.706	258.5	281.613	341.239	301.636	277.041	263.783	242.385	316.872	269.613	207.727	272.559	230.704	Predicted protein
Phatr3_J31665	327.685	365.362	426.518	290.503	396.509	362.41	354.167	324.792	331.659	287.205	365.049	348.435	349.64	367.586	374.89	359.433	362.904	368.454	478.574	511.278	419.986	380.794	429.053	332.205	524.871	448.64	434.724	398.558	341.672	368.317	Predicted protein
Phatr3_J3171	455.077	403.269	1074.14	498.725	451.965	522.624	327.604	302.322	407.528	386.558	326.575	295.642	356.515	346.636	324.485	401.472	318.397	343.589	309.152	280.702	298.697	315.801	308.523	330.404	290.506	382.756	367.844	267.362	306.629	309.629	Predicted protein
Phatr3_J17344	300.439	251.64	254.029	291.343	319.795	382.972	225.289	205.293	204.848	141.098	127.946	181.257	113.928	146.654	92.4099	94.5877	81.0258	76.8555	87.3309	89.3142	89.6092	69.1596	102.541	88.2278	73.072	69.0215	70.0157	92.4336	101.236	121.423	Xanthine/uracil permease
Phatr3_J24474	705.443	653.296	1179.2	806.021	748.654	755.664	5677.49	6218.03	5215.5	4450.85	4455.74	3811.67	993.92	1302.74	1420.8	815.557	965.463	961.824	403.469	570.517	563.904	238.309	227.569	236.775	1141.53	1123.17	1121.3	255.435	223.888	190.229	Proteasome subunit alpha type
Phatr3_J9278	109.719	103.237	181.897	109.149	103.518	107.095	182.002	203.25	151.739	162.805	169.103	165.419	127.677	92.3727	98.7106	87.2309	69.6137	76.8555	120.517	140.351	106.807	85.8246	110.636	108.034	155.055	144.318	106.591	79.5127	100.263	62.7352	Predicted protein
Phatr3_J42635	251.102	229.057	310.48	229.212	289.295	209.05	280.382	306.408	317.569	297.224	297.049	316.759	274.998	319.019	267.779	261.693	302.42	339.068	358.93	401.003	341.239	409.125	445.244	364.615	315.457	312.688	340.673	366.753	405.918	427.004	Predicted protein
Phatr3_J42636	292.339	318.583	346.546	245.165	271.734	266.453	283.333	289.045	251.454	323.106	297.049	295.642	320.176	352.349	427.396	439.308	343.504	506.342	675.068	699.02	692.435	800.751	805.037	688.717	707.551	570.996	621.781	680.828	690.159	754.846	Predicted protein
Phatr3_EG01869	2104.55	2063.13	1144.7	1838.73	1913.23	2094.78	17975.9	20764.2	15818.8	14542.3	13856.6	11215	6330.84	10932.4	10806.7	6961.66	8928.82	9669.1	2278.46	3243.56	2889.22	1942.3	1798.97	1968.92	5526.74	5294.79	5336.87	2590.13	2116.23	2086.45	NA
Phatr3_J42638	1142.11	1120.28	1488.11	1161.17	1214.48	1151.49	1258.28	1391.09	1242.09	1264.04	1150.62	1298.71	894.724	1094.19	1044.86	1028.9	1049.91	925.657	897.762	935.976	955.831	1055.73	952.553	1062.34	1014.1	928.653	1057.55	967.074	854.668	966.325	Predicted protein
Phatr3_EG01841	0	0	0	0	0	0	0	0	0	0	0	0	0	0	0	0	0	0	0	0	0	0	0	0	0	0	0	0	0	0	NA
Phatr3_EG01822	511.041	584.741	346.546	420.642	476.92	415.529	781.134	795.639	842.153	819.036	830.307	929.161	857.403	953.248	980.806	1085.66	1122.95	1166.4	1829.58	1890.18	1645.55	2058.12	1946.48	1830.28	1481.94	1153.5	1203.85	1828.79	1757.03	1910.39	NA
Phatr3_J53961	112.665	127.433	90.9487	120.064	119.23	171.352	104.282	121.542	125.727	90.1691	117.209	95.0278	69.7315	87.6112	78.7585	52.5487	41.0835	53.1207	54.1452	30.0752	30.7749	29.1637	44.9742	39.6125	56.1407	23.0072	12.5401	44.7259	27.2559	52.6166	RTX toxins and related Ca2+-binding protein
Phatr3_J8407	445.504	416.98	652.321	486.971	439.026	441.232	783.102	866.112	765.199	692.132	778.413	728.547	454.728	516.144	558.66	475.041	469.037	513.124	510.886	420.141	462.528	437.455	441.646	446.541	701.313	510.341	509.965	473.101	450.696	435.099	Predicted protein
Phatr3_J42642	84.6826	75.8146	3.13616	45.3387	61.0015	83.1059	209.549	319.685	296.975	201.211	210.261	242.849	120.802	179.984	195.321	163.952	230.524	222.655	119.643	165.869	116.763	138.319	127.727	130.541	243.276	219.614	182.877	140.141	108.05	90.0554	Predicted protein
Phatr3_J42643	435.931	373.427	232.076	419.802	415.919	461.794	720.139	748.656	567.938	623.67	682.677	559.608	453.746	633.277	563.911	531.793	671.031	708.653	417.442	462.064	420.892	379.961	409.265	406.928	722.7	630.606	646.862	449.247	378.663	350.103	Predicted protein
Phatr3_J42644	466.859	504.893	265.006	478.575	390.964	436.092	141.667	117.456	172.332	253.809	226.366	219.972	50.0888	30.4735	29.4032	184.972	165.475	153.711	15.7196	15.4933	12.672	10.8322	7.19587	18.0057	21.3869	10.4578	25.0803	15.9025	19.4685	6.07115	Predicted protein
Phatr3_J42645	52.2823	56.4577	23.5212	73.0456	74.8654	77.1085	118.056	182.823	171.249	155.291	171.788	170.698	81.5171	80.9451	72.4578	113.505	117.545	122.065	73.358	61.0618	46.1623	109.156	96.2447	97.2307	47.2295	28.2361	48.0705	67.5858	117.785	74.8775	Predicted protein
Phatr3_J42646	310.748	322.615	164.648	309.814	308.704	340.991	134.78	144.012	151.739	158.631	148.525	170.698	147.32	135.226	108.162	121.913	90.1555	141.279	206.101	199.59	182.839	198.313	239.263	201.664	150.6	152.684	135.851	185.861	191.765	191.241	Predicted protein
Phatr3_J42647	396.904	438.757	214.827	458.424	375.251	391.54	1045.78	1066.3	1120.7	1046.13	1012.83	1061.14	524.46	705.651	778.134	542.303	671.031	818.285	146.716	183.185	127.625	96.6568	107.938	135.043	387.638	224.843	246.623	128.214	104.157	103.21	Predicted protein
Phatr3_J31683	13074.3	11602.9	10695.9	11553	10728.9	12202	3028.13	2426.75	3899.7	5896.89	6155.72	7081.33	3305.86	2754.04	2425.76	12023.2	12224.6	14263.5	12.2263	4.55685	6.336	406.625	425.456	599.589	19.6047	0	0	717.603	584.055	716.396	Predicted protein
Phatr3_J31684	157.583	144.37	127.015	135.176	144.185	133.655	155.44	126.649	118.14	126.07	130.63	109.106	133.57	126.655	182.72	170.258	164.334	170.664	78.5979	104.807	103.186	104.989	119.631	131.441	65.0519	72.1589	48.0705	113.306	95.3957	123.447	Predicted protein
Phatr3_EG01814	149.483	160.501	150.536	140.214	111.836	139.652	162.326	140.948	152.823	168.65	119.893	114.385	148.302	114.275	133.364	142.933	132.38	123.195	90.8242	82.0233	89.6092	126.654	123.229	120.638	51.6851	73.2046	64.7907	110.324	102.21	133.565	NA
Phatr3_J42649	246.684	233.09	321.456	320.729	256.021	297.296	1090.05	1085.7	919.106	718.848	725.624	693.351	357.497	532.333	475.701	358.382	473.602	536.858	179.902	212.349	170.167	209.145	175.399	178.256	256.643	233.209	275.883	248.477	221.941	185.17	Predicted protein
Phatr3_J42650	496.313	421.82	274.414	474.377	491.709	440.375	888.368	981.526	745.69	693.801	779.307	503.295	587.316	825.64	812.787	670.522	837.647	888.359	611.317	583.276	550.327	692.429	849.112	763.441	459.819	407.854	459.805	740.462	817.678	765.977	Predicted protein
Phatr3_J17362	810.744	676.686	1368.93	889.142	835.535	685.409	7428.65	7389.53	5244.76	5094.56	4773.37	3982.37	1388.74	1724.61	1972.11	580.138	733.797	665.704	988.586	1593.99	1259.96	115.821	134.023	153.048	2962.09	3077.73	3052.48	140.141	177.163	125.47	Predicted protein
Phatr3_J24493	417.522	462.147	417.109	531.47	579.514	562.892	1302.55	1385.98	1235.59	1106.24	1116.62	1631.31	788.654	1026.57	980.806	930.113	1008.83	1018.34	751.919	1007.97	941.349	863.245	901.282	893.082	774.385	969.439	1009.48	900.482	810.864	897.519	Eukaryotic translation initiation factor 6	EIF6
Phatr3_EG02175	0.73637	3.22615	0	0	1.84853	1.71352	0.983796	1.02136	11.9224	2.5047	2.68418	1.75977	0.982134	6.66607	0	4.2039	3.42363	3.39068	2.61993	0.911369	3.62057	0	0	1.80057	0	6.27468	3.13503	0.993909	0.973426	0	NA
Phatr3_EG02169	583.205	585.547	468.856	852.199	888.218	896.172	603.067	627.114	531.087	561.887	577.099	571.927	489.103	476.148	513.505	339.465	353.775	311.943	313.518	356.345	375.634	199.146	214.976	236.775	390.311	409.946	450.4	226.611	213.18	213.502	NA
Phatr3_EG02171	748.152	762.179	451.607	650.694	664.546	700.831	331.539	348.283	393.438	347.318	285.418	297.402	461.603	424.724	489.353	521.284	482.731	540.249	229.68	229.665	184.649	305.802	324.713	341.208	122.975	164.188	148.392	347.868	329.991	356.174	Predicted protein
Phatr3_J42654	760.67	706.528	945.552	722.06	790.246	669.987	576.505	613.837	680.659	702.985	679.098	635.279	716.958	679.939	794.936	796.639	699.561	680.397	551.932	595.124	581.102	655.766	680.909	700.421	484.77	524.982	508.92	600.321	633.7	681.993	Predicted protein
Phatr3_EG01818	290.13	289.547	235.212	295.541	266.188	288.729	189.873	241.041	196.177	237.111	221.892	146.061	157.141	102.848	115.512	122.964	135.804	102.851	86.4576	54.6822	68.7909	58.3274	70.1597	64.8204	196.938	108.761	97.186	79.5127	76.9006	59.6997	NA
Phatr3_J9639	109.719	112.915	0	68.008	47.1375	105.382	59.0278	59.2388	79.1212	70.1316	60.8414	51.0335	59.9102	46.6625	46.205	55.7017	47.9308	45.2091	32.3125	23.6956	28.0594	33.3299	23.3866	45.0142	73.072	29.2819	36.5754	29.8173	19.4685	15.1779	NA
Phatr3_J42656	98.6736	127.433	241.484	159.525	168.216	137.939	79.6875	76.6019	42.2702	101.023	101.999	128.464	113.928	158.081	127.064	198.634	180.311	184.227	119.643	92.0483	131.246	211.645	151.113	149.447	140.797	99.3492	114.951	159.025	158.668	156.838	Predicted protein
Phatr3_J31693	19.882	28.2289	21.9531	36.103	20.3338	25.7028	65.9144	67.4097	33.5994	71.8014	80.5254	89.7485	65.803	98.0865	74.558	65.1604	117.545	109.632	50.6519	71.0868	60.6446	52.4946	58.4664	47.715	65.943	48.1059	41.8004	43.732	66.1929	55.6522	Predicted protein
Phatr3_J8663	446.24	388.752	222.667	468.5	399.282	427.524	554.861	618.944	589.615	584.43	619.151	658.156	249.462	314.258	310.833	338.414	346.928	322.115	324.871	309.866	380.16	300.803	317.518	297.994	291.397	309.551	312.458	248.477	227.782	239.81	Predicted protein
Phatr3_J9197	547.123	505.7	1139.99	649.015	600.772	520.054	747.685	613.837	582.028	708.83	674.624	828.854	879.01	833.259	1033.31	958.489	1059.04	848.801	1142.29	1134.65	1113.33	1129.88	1251.18	1074.94	528.435	655.704	749.273	905.451	1009.44	1038.17	Predicted protein
Phatr3_J9168	226.066	200.828	269.71	265.315	254.173	210.763	253.819	229.806	143.068	212.064	227.261	221.732	208.212	214.267	208.972	209.144	166.617	152.581	213.961	240.602	229.906	182.481	175.399	155.749	156.837	224.843	211.092	132.19	184.951	214.514	NA
Phatr3_J17372	366.712	347.618	249.325	421.482	425.162	347.845	384.664	392.202	360.923	391.568	411.574	388.91	329.997	332.351	366.489	363.637	287.585	257.692	327.491	373.661	334.903	252.474	303.126	320.501	372.489	409.946	405.464	240.526	254.064	239.81	Predicted protein
Phatr3_J42658	223.857	245.188	254.029	264.476	234.763	271.593	187.905	215.507	156.075	244.626	253.208	168.938	189.552	206.648	199.521	176.564	214.547	204.571	241.907	262.474	302.318	234.143	263.549	279.088	286.941	304.322	305.143	233.569	253.091	268.143	Predicted protein
Phatr3_J42659	1320.31	1141.25	1891.1	1230.86	1321.7	1216.6	1691.15	1591.28	1536.9	1345.86	1441.41	1370.86	1868.02	2520.73	2827.95	1281.14	1343.2	1360.79	988.586	1382.55	1201.12	262.473	233.866	230.473	3463.79	3448.98	3429.73	270.343	280.347	263.083	Predicted protein
Phatr3_J5466	809.271	762.986	597.439	717.023	689.501	818.207	4115.22	4960.74	4256.29	3534.13	3421.44	3746.56	2090.96	3181.62	3677.5	2387.82	2865.58	3373.73	1016.53	1454.55	1120.57	884.909	824.826	868.774	2659.11	1843.71	2207.06	936.263	978.293	979.479	Predicted protein	SDER1-1
Phatr3_J42660	159.056	151.629	185.033	168.761	146.034	148.22	234.144	256.361	207.016	217.909	242.471	175.977	157.141	217.123	206.872	203.889	194.006	212.483	220.947	278.879	232.622	156.651	130.425	179.157	384.074	377.527	378.294	175.922	153.801	175.052	Predicted protein
Phatr3_EG01774	94.2554	105.657	180.329	62.9704	97.972	61.6868	22.6273	17.3631	18.4255	33.396	17.8945	40.4748	40.2675	48.5671	35.7038	35.7331	42.2247	49.73	68.1181	74.7323	74.2217	88.3243	106.139	101.732	30.2982	25.0987	41.8004	82.4945	88.5817	95.1147	NA
Phatr3_J53964	523.559	446.822	402.997	446.67	484.315	451.513	463.368	516.808	522.417	502.609	492.995	615.921	673.744	706.603	680.473	741.988	763.469	779.857	826.151	804.739	738.597	844.08	967.844	845.367	805.574	766.557	756.588	837.866	818.651	867.163	Probable calcium ATPase
Phatr3_J42663	531.659	567.803	746.406	511.319	512.042	564.606	308.912	356.454	288.305	371.53	316.733	263.966	474.371	404.726	366.489	435.104	396	386.538	434.035	472.089	425.417	391.627	375.984	437.538	347.538	444.457	472.345	420.424	385.477	393.613	Predicted protein
Phatr3_EG02403	703.97	725.885	456.311	580.167	693.198	652.852	674.884	690.439	711.007	732.207	743.518	828.854	831.868	810.404	847.441	871.258	796.564	991.21	1282.89	1228.53	1283.49	1406.52	1392.4	1288.31	992.71	1029.05	1018.89	1327.86	1174.92	1285.06	NA
Phatr3_EG01821	8.10007	8.06539	14.1127	4.19802	6.46985	9.42438	9.83796	15.3204	3.25156	10.0188	16.9998	8.79887	4.91067	13.3321	8.4009	10.5097	18.2593	13.5627	18.3395	9.11369	6.336	8.33248	4.49742	5.4017	16.9313	15.6867	17.7652	1.98782	8.76083	8.09487	NA
Phatr3_J31704	275.402	221.798	351.25	251.881	274.507	227.899	559.78	594.431	523.5	443.332	482.258	411.787	274.998	283.784	384.341	314.242	300.138	301.771	206.101	264.297	258.871	157.484	178.997	214.268	373.38	322.1	330.223	219.654	195.659	192.253	Predicted protein
Phatr3_EG01809	15.4638	24.1962	0	15.1129	10.1669	25.7028	13.7731	15.3204	30.3479	25.047	19.684	14.0782	10.8035	10.4753	22.0524	23.1214	12.5533	21.4743	28.8192	23.6956	15.3874	31.6634	33.2809	30.6097	56.1407	28.2361	40.7554	39.7564	19.4685	26.3083	NA
Phatr3_EG02479	0	0	0	0	0	0	0	0	0	0	0	0	0	0	0	0	0	0	0	0	0	0	0	0	0	0	0	0	0	0	NA
Phatr3_EG02434	254.048	270.997	58.019	225.014	257.87	237.323	485.995	521.914	509.41	418.285	471.521	575.446	380.086	379.014	446.298	463.48	405.129	367.324	440.148	465.71	447.141	489.95	446.144	484.353	448.234	491.517	596.701	448.253	408.839	484.68	NA
Phatr3_J42668	201.765	197.602	147.4	240.127	230.142	231.326	262.674	285.981	295.892	318.097	291.681	234.05	236.694	245.692	240.476	283.763	261.337	310.813	195.621	146.73	166.546	226.643	195.188	216.968	182.68	206.019	229.902	164.989	190.791	166.957	Predicted protein
Phatr3_J5889	372.603	439.564	589.598	489.49	485.239	463.508	714.236	633.243	636.221	622	605.73	615.921	457.674	414.249	371.74	325.802	296.714	226.046	295.179	187.742	236.242	161.65	141.219	168.353	209.414	253.079	207.957	158.032	183.004	181.123	Predicted protein
Phatr3_J42670	220.175	244.381	68.9955	259.438	289.295	215.904	202.662	223.678	183.171	216.239	229.05	221.732	289.73	331.399	322.385	294.273	259.054	308.552	465.474	495.785	434.469	443.288	436.249	396.125	326.151	373.344	340.673	385.637	433.174	410.815	Predicted protein
Phatr3_J42671	114.874	128.24	67.4275	172.119	113.685	168.782	127.894	127.67	99.7144	119.391	115.42	112.626	29.464	34.2826	46.205	37.8351	29.6714	24.865	28.8192	15.4933	25.344	19.1647	5.3969	7.20227	24.0603	21.9614	20.9002	9.93909	22.3888	19.2253	Predicted protein
Phatr3_J42672	276.139	287.128	371.635	188.911	273.582	234.753	505.671	479.017	515.913	415.78	440.206	540.251	360.443	376.157	337.086	376.249	350.351	379.757	352.817	380.041	399.168	399.959	383.18	402.427	173.769	223.797	200.642	409.491	332.912	396.649	Predicted protein
Phatr3_J42673	829.153	822.669	1292.1	816.936	878.975	1014.41	1433.39	1279.76	1401.42	1168.86	1166.72	1233.6	954.634	1162.75	950.352	1206.52	1265.6	1317.85	1149.28	1194.81	1250.91	1635.67	1595.68	1607.91	888.449	930.745	1204.9	1447.13	1347.22	1517.79	NA
Phatr3_J31713	75.1098	67.7492	31.3616	42.8199	62.85	58.2598	186.921	203.25	211.351	199.541	208.471	227.011	132.588	207.6	138.615	202.838	182.593	207.962	225.314	234.222	202.752	260.807	217.675	198.963	188.027	174.645	174.517	230.587	228.755	248.917	Predicted protein
Phatr3_J8658	632.542	638.779	1096.09	607.874	632.197	586.025	736.863	861.006	876.836	733.042	711.308	723.267	839.725	1059.91	1036.46	1020.5	998.558	1001.38	891.649	963.318	884.325	905.741	939.06	822.86	1082.71	1044.73	1015.75	929.305	1001.65	995.669	Predicted protein
Phatr3_J42675	424.886	370.201	308.912	439.113	414.995	439.519	411.227	383.01	399.941	429.138	383.838	320.279	592.227	577.091	552.359	514.978	575.169	549.291	534.465	524.037	561.189	629.102	622.442	631.999	548.931	587.729	521.46	626.163	634.674	553.487	Predicted protein
Phatr3_J42676	111.928	140.338	368.499	117.545	147.882	104.525	84.6065	97.0291	102.966	90.1691	66.2098	116.145	197.409	216.171	221.574	109.301	75.3198	99.4601	592.977	790.157	628.169	150.818	156.51	187.259	1594.22	1285.26	1181.91	123.245	187.871	133.565	Predicted protein
Phatr3_J42677	580.996	571.836	260.301	524.753	459.359	534.619	330.556	372.796	460.637	329.785	343.575	510.335	503.835	391.394	390.642	397.269	397.141	406.882	470.714	503.076	492.398	488.283	492.017	517.663	454.472	508.249	483.84	506.894	509.102	514.024	Predicted protein
Phatr3_J31718	327.685	377.46	227.372	251.881	419.616	352.129	1026.1	996.846	1090.35	1048.63	986.884	1309.27	1339.63	1563.67	1514.26	1676.3	1782.57	2028.76	2596.35	2746.87	2560.65	3285.5	2972.79	2861.1	1689.57	1705.67	1779.65	2759.09	2831.7	3022.42	Inosine-5'-monophosphate dehydrogenase
Phatr3_J53967	80.2643	67.7492	23.5212	108.309	137.715	123.374	32.4653	41.8757	33.5994	27.5517	30.4207	36.9553	14.732	11.4275	21.0023	14.7136	27.389	18.0836	15.7196	11.8478	5.43086	2.49974	18.8891	14.4045	4.45561	4.18312	7.31508	15.9025	8.76083	15.1779	Predicted protein
Phatr3_J9164	343.885	336.327	1224.67	408.888	369.706	440.375	167.245	170.567	203.764	224.588	195.945	198.854	209.195	170.461	164.868	195.481	170.04	183.097	240.16	257.006	314.085	260.807	258.152	321.401	195.156	276.086	249.758	241.52	231.675	228.68	Thioredoxin	TRX-O
Phatr3_J42680	67.7461	57.2642	145.831	69.6872	76.7139	55.6895	13.7731	9.19223	40.1025	23.3772	16.1051	15.838	29.464	35.2349	30.4533	24.1724	18.2593	11.3023	89.9509	59.239	70.6012	78.3253	53.969	75.6238	53.4673	55.4264	75.2408	56.6528	72.0335	74.8775	Predicted protein
Phatr3_J31722	136.965	115.335	133.287	146.931	117.382	112.236	114.12	125.627	117.056	133.584	156.577	151.341	95.267	87.6112	101.861	76.7212	101.568	115.283	113.53	149.465	106.807	121.654	154.711	135.943	222.781	167.325	197.507	142.129	124.598	92.0791	Predicted protein
Phatr3_J9251	434.458	425.852	379.475	412.246	403.904	368.407	814.583	913.095	674.156	628.679	707.729	605.362	536.245	577.091	665.772	538.099	508.979	505.212	619.176	572.34	548.517	479.118	496.515	468.148	679.035	645.247	668.807	446.265	549.985	532.238	Predicted protein
Phatr3_J17401	1070.68	1132.38	1063.16	968.065	1151.63	1105.22	1759.03	2106.04	1949.85	1853.48	1848.51	1768.57	1008.65	949.439	949.302	1095.12	1033.94	1130.23	974.613	930.508	964.883	1022.4	1109.96	1070.44	872.409	806.297	810.928	941.232	1049.35	1047.27	Dihydrolipoamide acetyltransferase	DHLTA_1
Phatr3_J31725	215.02	192.763	283.823	144.412	203.338	179.92	251.852	277.81	276.382	297.224	326.575	307.961	291.694	376.157	339.186	402.523	415.4	475.826	937.061	909.547	900.617	1240.71	1107.26	937.196	712.898	686.032	648.952	979.995	958.824	1002.75	Predicted protein
Phatr3_J42683	237.111	223.411	145.831	237.608	221.823	204.766	135.764	172.61	178.836	187.852	184.314	177.737	150.267	168.556	153.316	223.858	199.712	181.967	154.576	85.6687	92.3246	190.814	221.273	216.968	61.4874	70.0673	36.5754	208.721	211.233	180.111	Phosphoinositide phospholipase C	PLC-DELTA
Phatr3_J1550	339.467	333.907	965.938	333.323	282.825	305.007	233.16	231.848	175.584	231.267	249.629	249.888	272.051	230.456	198.471	250.132	236.23	283.687	254.133	210.526	162.926	271.639	289.634	316	85.5477	111.899	84.6459	302.148	297.868	264.095	NA
Phatr3_J42685	47.8641	66.9427	31.3616	70.5268	53.6073	64.2571	40.3357	33.7048	39.0187	38.4054	44.7364	49.2737	50.0888	31.4258	54.6059	60.9565	50.2132	47.4696	34.9324	33.7207	38.016	58.3274	56.6674	35.1111	32.9715	37.6481	28.2153	44.7259	52.565	75.8894	NA
Phatr3_J42686	33.1367	29.8419	26.6574	26.0278	28.6522	23.1326	12.7894	14.299	13.0062	17.5329	18.7893	31.6759	24.5534	19.0459	27.3029	33.6312	33.0951	19.2139	20.0861	34.632	24.4389	29.1637	21.5876	19.8062	19.6047	25.0987	14.6302	30.8112	31.1496	28.332	Predicted protein
Phatr3_J42687	466.122	398.43	265.006	355.153	367.857	406.962	442.708	471.868	410.78	450.011	432.153	466.34	432.139	468.53	479.902	483.448	535.227	629.537	482.94	480.292	516.837	508.281	513.605	541.071	570.318	564.722	564.306	492.979	435.121	525.155	NA
Phatr3_J31731	508.095	446.822	578.622	351.794	425.162	386.399	185.938	231.848	277.466	274.682	296.155	366.033	358.479	374.252	422.145	535.997	411.976	569.635	627.91	711.78	696.055	897.408	947.156	836.364	379.618	353.474	346.944	768.292	801.129	744.728	Predicted protein
Phatr3_EG02466	558.169	519.411	156.808	629.704	534.225	594.592	510.59	471.868	570.106	560.218	491.205	568.407	15.7141	19.0459	13.6515	26.2744	7.98846	16.9534	13.973	4.55685	9.05143	14.1652	11.6933	23.4074	6.23785	11.5036	19.8552	14.9086	8.76083	10.1186	NA
Phatr3_J42689	3064.04	2734.17	1941.28	2187.17	2491.82	2696.23	2951.39	2792.4	2683.62	3236.07	3327.49	2703.01	3069.17	3684.43	3621.84	3967.43	4813.62	4959.44	3672.27	3353.84	3653.16	3865.44	4130.43	3520.11	3248.14	3138.39	3286.56	4423.89	3919.98	3642.69	Predicted protein
Phatr3_J42690	298.23	275.836	203.85	254.4	308.704	252.745	175.116	214.485	198.345	220.413	265.734	209.413	228.837	325.685	319.234	306.885	301.279	319.855	386.003	358.168	348.48	464.952	469.53	352.911	377.836	303.276	367.844	438.314	466.271	432.064	Predicted protein
Phatr3_J53969	790.125	643.618	36.0658	471.018	526.831	628.863	138.715	152.182	166.913	184.513	212.05	244.609	309.372	302.83	261.478	445.613	450.778	409.143	660.222	544.088	572.956	949.07	928.267	994.814	300.308	231.118	336.493	1008.82	794.315	806.451	Predicted protein
Phatr3_J17408	758.461	646.037	341.842	611.232	628.5	649.425	488.947	550.512	475.811	458.36	487.626	640.558	676.69	607.565	646.87	792.435	745.209	775.336	948.414	899.522	761.225	1034.89	1076.68	999.315	737.849	813.617	768.083	980.989	1020.15	1049.3	Predicted protein
Phatr3_J6915	302.648	293.58	169.353	226.693	200.565	233.896	54.1088	35.7476	83.4566	85.9946	67.9993	102.067	139.463	96.1819	96.6104	63.0585	82.167	73.4648	261.993	209.615	231.717	194.98	225.77	223.27	199.611	181.966	171.382	193.812	146.987	160.886	Predicted protein
Phatr3_J42694	517.668	500.054	265.006	590.242	564.726	601.447	541.088	584.217	540.842	677.938	523.415	534.971	370.265	229.503	241.526	227.011	143.792	198.92	225.314	150.376	144.823	124.154	156.51	168.353	110.499	180.92	167.202	145.111	110.971	146.719	Predicted protein
Phatr3_J41667	324.003	259.705	249.325	251.042	296.689	263.026	303.993	337.048	319.736	315.592	288.997	262.206	260.266	303.782	278.28	316.343	302.42	252.041	274.219	295.284	272.448	316.634	339.105	358.313	250.405	275.04	279.018	334.947	333.885	348.079	Autophagy-related protein 3
Phatr3_J31740	167.892	170.18	178.761	197.307	184.853	196.198	134.78	154.225	163.662	153.621	128.841	174.218	87.4099	72.3745	71.4077	80.9251	102.709	80.2462	62.8783	51.0367	57.024	59.9939	63.8633	47.715	49.0117	54.3806	40.7554	44.7259	72.0335	40.4743	Predicted protein
Phatr3_J31741	101.619	95.9781	145.831	124.262	136.791	125.944	134.78	122.563	150.655	133.584	125.262	149.581	109.999	130.465	118.663	73.5682	86.7319	77.9857	105.67	118.478	121.289	116.655	94.4457	109.835	99.8057	87.8456	111.816	74.5432	102.21	72.8538	Predicted protein
Phatr3_J8976	1098.66	1058.18	2074.57	926.924	1061.98	959.573	1742.3	1686.26	1493.55	1688.17	1720.56	1659.47	1584.18	1376.07	1415.55	1617.45	1668.45	1629.79	2058.39	1994.99	1926.14	2179.78	2167.75	1928.41	1332.23	1331.28	1368.96	1920.23	2207.73	2190.67	Predicted protein
Phatr3_EG02477	12801.8	12492.5	20167.1	11741	12976.7	11007.7	19109.3	17016.9	18463.4	19473.2	19525.6	22108	19601.4	17353.7	18914.6	21502.9	20243.9	20026.5	21147.2	22589.2	21964.2	26370.6	27204	23858.4	16861.8	19111.6	17855.1	23245.6	27859.4	26594.7	40S ribosomal protein S8
Phatr3_J42697	1776.86	1642.11	1207.42	1116.67	1297.67	1184.9	350.232	379.946	514.83	340.639	341.786	469.86	1388.74	1227.51	1178.23	1288.5	1088.71	1069.2	1656.67	1679.65	1746.93	1827.31	1877.22	1872.59	1336.68	1344.87	1317.76	1748.29	1926.41	1741.41	Predicted protein
Phatr3_J42698	212.811	232.283	53.3147	198.986	179.307	204.766	285.301	300.28	329.491	295.554	310.47	337.877	168.927	162.843	158.567	282.712	256.772	365.064	97.8107	108.453	87.7989	211.645	222.172	171.054	65.0519	92.0287	66.8807	216.672	225.835	249.929	Predicted protein
Phatr3_J42699	198.084	245.188	59.5871	287.145	219.975	319.572	225.289	252.276	296.975	256.314	209.366	230.53	155.177	113.323	74.558	78.8231	66.1901	83.6369	115.277	69.2641	102.281	92.4905	77.3556	88.2278	188.027	175.691	201.687	56.6528	100.263	75.8894	Predicted protein
Phatr3_J24547	508.832	550.059	344.978	561.696	639.591	607.444	402.373	401.394	427.038	324.776	355.207	466.34	517.585	486.623	444.198	506.57	520.391	491.649	561.538	540.442	591.964	679.93	623.342	681.515	532.891	649.43	705.382	624.175	557.773	724.491	Predicted protein
Phatr3_J31748	412.367	348.425	468.856	335.002	334.584	313.575	251.852	200.186	212.435	207.89	208.471	246.368	379.104	314.258	268.829	281.661	245.36	287.078	360.677	403.737	347.575	354.964	367.889	351.111	295.853	334.65	270.658	330.972	364.061	357.186	Predicted protein
Phatr3_J42701	193.665	229.864	174.057	256.919	217.202	283.588	367.94	417.736	373.929	380.714	319.418	315	190.534	196.173	215.273	180.768	133.521	148.06	185.142	114.833	169.262	116.655	113.335	150.347	156.837	170.462	150.482	128.214	116.811	124.459	Predicted protein
Phatr3_EG02470	290.866	275.836	172.489	390.416	284.673	305.007	1124.48	1235.84	1103.36	1017.74	921.569	1068.18	374.193	621.849	694.125	327.904	485.014	462.263	88.2043	238.779	180.123	65.8266	68.3607	43.2136	550.713	398.442	439.95	81.5006	81.7678	32.3795	Predicted protein
Phatr3_J9200	707.652	821.863	885.965	926.924	828.141	926.159	801.794	842.621	826.979	857.442	883.99	964.356	655.083	664.702	702.526	663.165	704.126	665.704	779.865	713.602	731.356	774.087	761.862	758.039	933.005	751.916	782.713	683.81	689.185	678.957	Predicted protein
Phatr3_EG02473	178.938	171.793	39.202	203.184	173.762	185.06	271.528	223.678	257.957	219.579	237.997	200.614	235.712	220.933	252.027	189.175	223.677	252.041	178.155	240.602	199.131	178.315	165.505	219.669	247.732	245.758	259.163	187.849	206.366	205.407	NA
Phatr3_J31753	68.4824	78.2342	61.1551	77.2437	82.2595	77.1085	62.963	35.7476	50.941	59.2779	53.6836	45.7541	58.928	36.1872	48.3052	55.7017	41.0835	29.3859	62.005	89.3142	69.696	54.1611	59.3659	60.319	67.7253	76.342	95.096	56.6528	43.8042	51.6048	Predicted protein
Phatr3_EG02172	397.64	456.501	0	451.707	378.024	535.476	628.646	735.378	729.432	629.514	569.941	622.96	290.712	223.79	210.023	136.627	140.369	148.06	271.599	233.311	232.622	34.9964	22.4871	29.7094	957.956	686.032	733.598	39.7564	37.9636	30.3558	Predicted protein
Phatr3_EG02178	440.349	474.245	473.56	611.232	513.891	544.044	735.88	779.297	742.439	702.15	638.835	533.212	293.658	344.731	270.929	165.003	189.441	165.013	395.609	325.359	265.207	38.3294	30.5824	57.6182	915.182	866.952	838.099	36.7746	41.8573	50.5929	NA
Phatr3_J9277	58.1732	55.6512	0	83.1209	39.7434	69.3977	33.4491	29.6194	39.0187	32.5611	37.5785	35.1955	29.464	32.3781	21.0023	40.988	13.6945	19.2139	24.4527	26.4297	23.5337	30.8302	32.3814	27.9088	24.0603	35.5565	40.7554	29.8173	16.5482	21.249	Predicted protein
Phatr3_J42708	44.1822	51.6185	31.3616	82.2813	93.3507	76.2518	13.7731	14.299	7.58696	5.8443	9.842	10.5586	14.732	8.57066	15.7517	15.7646	15.9769	13.5627	24.4527	24.607	29.8697	19.998	17.9897	17.1054	38.3182	25.0987	20.9002	25.8416	15.5748	26.3083	Predicted protein
Phatr3_J9547	318.848	310.517	302.64	325.767	305.932	333.28	167.245	144.012	226.525	165.31	150.314	186.536	286.783	187.602	195.321	259.591	204.276	259.952	240.16	217.817	262.492	231.643	278.84	286.29	199.611	231.118	214.227	268.356	251.144	252.965	Predicted protein	RFC4
Phatr3_J8720	1899.83	2123.62	6614.16	1929.41	2165.55	1819.76	2378.82	2171.41	2451.67	2579.84	2715.5	3201.03	5556.91	5259.53	5786.12	4883.88	4977.95	5048.73	4765.65	5728.87	5191.9	4552.03	4605.35	4072.88	6353.7	6172.2	6205.27	4428.86	5016.06	4914.6	Predicted protein
Phatr3_EG01773	1858.6	1849.39	4136.6	1968.87	2083.29	1834.33	2186.98	1970.2	1942.26	2493.84	2428.29	2676.62	5370.31	4843.38	5429.08	4335.27	4375.4	4464.4	5723.67	6160.86	5656.24	4642.03	4392.18	4174.62	6551.53	6459.79	6176.01	4005.45	4894.38	4778	NA
Phatr3_J9427	95.7281	90.3323	105.061	88.1585	102.593	74.5382	101.331	77.6233	107.301	101.023	92.1569	84.4692	158.124	140.94	158.567	155.544	133.521	117.544	114.404	126.68	132.151	127.487	108.837	101.732	93.5678	116.082	134.806	115.293	129.466	114.34	Udp-n-acetylglucosamine transferase subunit alg13
Phatr3_J9490	240.793	228.25	145.831	190.59	217.202	201.339	96.412	86.8155	120.308	140.263	135.104	218.212	404.639	458.054	399.043	567.526	583.158	630.667	229.68	257.918	192.795	368.296	411.064	365.515	204.067	139.089	146.302	387.625	327.071	429.028	Predicted protein
Phatr3_J42712	1774.65	1698.57	5841.1	1459.23	1733.92	1511.33	2385.71	2244.95	2007.29	2460.45	2511.5	2491.84	3309.79	3256.85	3664.89	4220.72	3938.31	3865.38	2840	3074.96	3066.63	3391.32	3579.94	3407.57	2324.94	2496.28	2442.19	3322.64	3672.73	3718.58	Predicted protein
Phatr3_J31763	263.621	279.869	514.33	236.769	272.658	259.599	239.063	342.155	299.143	305.573	293.471	316.759	393.836	513.287	505.104	517.08	487.296	506.342	390.369	450.217	413.65	406.625	429.953	383.521	446.452	474.784	367.844	394.582	425.387	419.921	Predicted protein
Phatr3_J31764	103.828	84.6866	68.9955	78.9229	91.5022	92.5302	119.039	103.157	89.9597	92.6738	109.157	87.9887	143.392	131.417	140.715	149.238	125.533	153.711	174.662	140.351	126.72	142.485	123.229	153.048	195.156	147.455	138.986	161.013	146.014	160.886	Predicted protein
Phatr3_J8686	12196.5	13239.3	49521.5	13066.8	12982.2	11396.6	20665.6	18461.1	17014.3	20657.1	20866.8	21131.4	19115.3	15119.6	16485.7	17620.6	17279	16587.2	19234.6	18589.2	18397	22001.1	23851.6	19917	15079.6	15240.2	14851.7	18761	25056.9	21246	40S ribosomal protein S12
Phatr3_EG02471	533.132	478.277	302.64	444.151	443.647	442.089	369.907	479.017	406.444	424.964	472.416	387.15	488.121	539.952	490.403	563.323	603.7	618.235	736.2	682.616	656.229	813.25	869.8	794.05	668.342	555.309	592.521	846.811	808.917	812.522	Predicted protein
Phatr3_J6927	525.032	596.032	213.259	615.43	604.469	637.431	640.451	641.413	773.87	624.505	591.415	628.239	553.924	587.566	591.214	535.997	538.651	509.733	659.349	677.148	648.988	667.432	767.259	622.096	773.494	658.842	638.502	657.968	625.913	706.277	Predicted protein
Phatr3_J31768	451.395	474.245	763.655	407.208	431.631	323.856	572.569	572.982	608.041	611.146	734.571	693.351	622.673	660.893	799.136	756.702	627.665	761.774	642.756	846.662	683.383	771.588	729.481	739.133	730.72	719.497	648.952	800.097	788.475	796.333	Elongation factor Ts, mitochondrial
Phatr3_J6258	198.82	158.888	175.625	118.384	150.655	138.795	364.005	392.202	409.696	404.926	514.468	401.229	634.459	772.312	699.375	1097.22	1124.09	1238.73	1917.79	1636.82	1579.47	2464.75	2264.9	1968.92	1023.9	875.318	937.375	2291.95	2195.07	2247.34	Predicted protein
Phatr3_J8940	312.957	321.809	478.265	398.812	301.31	370.978	101.331	117.456	138.733	136.089	101.999	151.341	150.267	144.749	124.963	121.913	93.5791	140.148	73.358	47.3912	53.4034	90.824	67.4612	111.635	4.45561	29.2819	33.4403	69.5737	78.8475	97.1384	Peptidyl-prolyl cis-trans isomerase
Phatr3_J9011	332.103	329.874	304.208	379.501	368.781	301.58	534.201	678.182	575.525	517.638	535.942	524.413	439.996	413.296	435.797	421.441	360.622	370.715	303.912	325.359	265.207	239.975	264.448	264.683	330.606	392.168	326.043	219.654	259.905	239.81	Peptidyl-prolyl cis-trans isomerase
Phatr3_J31772	66.2733	42.7465	20.385	60.4516	33.2735	40.2678	75.7523	71.4951	74.7858	45.9195	48.3153	80.9496	52.0531	55.2332	81.9088	37.8351	36.5187	31.6464	49.7786	51.0367	57.024	29.1637	20.6881	17.1054	90.8945	128.631	126.446	8.94518	25.3091	29.3439	Predicted protein
Phatr3_J42720	276.875	287.934	299.503	301.418	284.673	248.461	270.544	295.173	290.472	308.913	239.787	260.447	389.907	439.961	316.084	343.669	367.469	430.617	288.192	277.968	305.938	376.628	354.396	382.621	300.308	312.688	353.214	359.795	307.602	399.684	NA
[truncated: 11,984 more rows]

## Sheet: 5. WT mutant comparisons
Supplementary Data 5. Differences in the expression levels of each gene between P. tricornutum wild type and the aureo1c-1 mutant under various light conditions and their statistical confidence.
[truncated: 9,975 more rows]

[truncated: 4 more sheets: 6. GO analyses, 7. Chlamydomonas proteomics-TAP, 8. Chlamydomonas proteomics-HS, 9. Phaeodactylum proteomics]
