# Supplementary material for: A rapid aureochrome opto-switch enables diatom acclimation to dynamic light
Source: Nat Commun. 2024 Jul 3;15:5578. doi: 10.1038/s41467-024-49991-7 (PMC11219949; doi:10.1038/s41467-024-49991-7)
Supplement: Supplementary file 6 — Source Data [file 41467_2024_49991_MOESM6_ESM.xlsx]

## Sheet: Fig. 1
Fig. 1d
NPQ
WT					aureo1c-1					COMP
Time (min)	rep-1	rep-2	rep-3		Time (min)	rep-1	rep-2	rep-3		Time (min)	rep-1	rep-2	rep-3
0	0	0	0		0	0	0	0		0	0	0	0
0.5	0.344	0.266	0.253		0.5	0.136	0.179	0.11		0.5	0.781	0.921	0.789
1	0.82	0.691	0.665		1	0.298	0.311	0.219		1	1.614	1.711	1.556
1.5	1.058	1.08	1.042		1.5	0.418	0.359	0.246		1.5	1.95	1.942	1.842
2	1.189	1.276	1.284		2	0.528	0.394	0.287		2	1.988	2.118	2.097
2.5	1.325	1.175	1.251		2.5	0.643	0.496	0.397		2.5	2.128	2.202	2.105
3	1.463	1.293	1.357		3	0.722	0.612	0.525		3	2.241	2.185	2.156
3.5	1.592	1.445	1.496		3.5	0.814	0.709	0.648		3.5	2.234	2.296	2.172
4	1.689	1.538	1.571		4	0.901	0.811	0.707		4	2.272	2.297	2.315
4.5	1.741	1.591	1.607		4.5	0.951	0.869	0.772		4.5	2.274	2.334	2.239
5	1.783	1.635	1.636		5	1.031	0.922	0.842		5	2.308	2.364	2.318
5.5	1.811	1.679	1.657		5.5	1.081	0.946	0.872		5.5	2.287	2.39	2.325
6	1.838	1.702	1.675		6	1.108	0.97	0.897		6	2.339	2.398	2.377
6.5	1.86	1.724	1.68		6.5	1.128	0.994	0.95		6.5	2.353	2.417	2.392
7	1.878	1.738	1.626		7	1.167	1.019	0.984		7	2.234	2.409	2.415
7.5	1.888	1.744	1.697		7.5	1.19	1.051	1.014		7.5	2.415	2.386	2.321
8	1.892	1.748	1.699		8	1.21	1.054	1.005		8	2.322	2.431	2.348
8.5	1.905	1.754	1.704		8.5	1.228	1.064	1.032		8.5	2.368	2.454	2.402
9	1.911	1.761	1.702		9	1.225	1.08	1.051		9	2.276	2.424	2.348
9.5	1.918	1.771	1.705		9.5	1.239	1.084	1.06		9.5	2.302	2.465	2.455
10	1.928	1.777	1.712		10	1.259	1.107	1.089		10	2.361	2.444	2.451
11	1.641	1.593	1.534		11	0.692	0.866	0.754		11	2.409	2.571	2.481
12	0.666	0.628	0.649		12	0.326	0.555	0.453		12	1.79	1.815	1.824
13	0.085	0.069	0.061		13	0.107	0.252	0.191		13	0.613	0.649	0.75
14	0	0	0		14	0.007	0.072	0.056		14	0.109	0.123	0.132
15	0	0	0		15	0	0	0		15	0	0	0.008
16	0	0	0		16	0	0	0		16	0	0	0
17	0	0	0		17	0	0	0		17	0	0	0
18	0	0	0		18	0	0	0		18	0	0	0
19	0	0	0		19	0	0	0		19	0	0	0
20	0	0	0		20	0	0	0		20	0	0	0
Fig. 1e
RT-qPCR
LHCX2	Ct number						LHCX3	Ct number
	RPS	LHCX2	fold change					RPS	LHCX3	fold change
WT-GL (defined as 1)	15.45	20.34	1.06994	rep1			WT-GL (defined as 1)	15.45	19.74	0.946464	rep1
	15.6	21.1	0.701021	rep2				15.6	20.24	0.74258	rep2
	15.76	20.45	1.22904	rep3				15.76	19.58	1.31096	rep3
aureo1a-1-GL	14.95	19.57	1.29014	rep1			aureo1a-1-GL	14.95	20.24	0.473232	rep1
	15.55	19.54	1.99658	rep2				15.55	20.66	0.536117	rep2
	15.37	19.77	1.50267	rep3				15.37	20.52	0.521457	rep3
aureo1b-1-GL	15.63	18.98	3.11133	rep1			aureo1b-1-GL	15.63	20.12	0.823945	rep1
	15.51	19.13	2.58028	rep2				15.51	20.24	0.697671	rep2
	15.99	19.33	3.13297	rep3				15.99	20.19	1.00739	rep3
aureo1c-1-GL	15.88	23.17	0.202716	rep1			aureo1c-1-GL	15.88	20.84	0.594859	rep1
	15.62	22.25	0.320308	rep2				15.62	20.71	0.543601	rep2
	15.97	22.61	0.318095	rep3				15.97	20.74	0.678593	rep3
COMP-GL	16.07	19.84	2.32548	rep1			COMP-GL	16.07	20.73	0.732357	rep1
	16.08	20.08	1.98279	rep2				16.08	20.98	0.62012	rep2
	15.89	19.75	2.18484	rep3				15.89	20.46	0.779499	rep3
WT-HL	15.53	14.81	52.2562	rep1			WT-HL	15.53	13.51	75.0937	rep1
	15.62	15.37	37.7271	rep2				15.62	14.32	45.5892	rep2
	15.24	15.17	33.3018	rep3				15.24	14.43	32.4606	rep3
aureo1a-1-HL	15.31	13.31	126.898	rep1			aureo1a-1-HL	15.31	13.78	53.4686	rep1
	15.32	13.32	126.898	rep2				15.32	14.28	38.071	rep2
	15.54	14.05	89.1109	rep3				15.54	14.9	28.8524	rep3
aureo1b-1-HL	15.47	13.16	157.317	rep1			aureo1b-1-HL	15.47	16.11	11.8813	rep1
	15.6	13.13	175.768	rep2				15.6	16.12	12.9118	rep2
	15.75	13.19	187.082	rep3				15.75	16.11	14.4262	rep3
aureo1c-1-HL	15.65	21.53	0.538691	rep1			aureo1c-1-HL	15.65	20.63	0.586669	rep1
	15.26	20.18	1.04792	rep2				15.26	19.93	0.727298	rep2
	16.07	21.03	1.01927	rep3				16.07	20.76	0.717285	rep3
COMP-HL	15.57	13.45	137.905	rep1			COMP-HL	15.57	13.88	59.7397	rep1
	16.19	14.38	111.24	rep2				16.19	14.19	74.0598	rep2
	16.12	14.33	109.708	rep3				16.12	14.25	67.6782	rep3

## Sheet: Fig. 3
Fig. 3f
EMSA-LHCX2
raw image:											annotated：
EMSA-LHCX3
											annotated：
raw image:

## Sheet: Fig. 4
Fig. 4a
RT-qPCR
CrLHCSR3.1	Ct number					CrLHCSR3.2	Ct number					PtLHCX2	Ct number					PtLHCX3	Ct number
	RACK1	LHCSR3.1	fold change				RACK1	LHCSR3.2	fold change				RPS	LHCX2	fold change				RPS	LHCX3	fold change
0 min (defined as 1)	13.96	26.17	1.16631	rep1		0 min (defined as 1)	13.82	24.03	0.636202	rep1		0 min (defined as 1)	18.7	23.1	1.1305	rep1		0 min (defined as 1)	18.7	22.05	0.863158	rep1
	14.17	26.64	0.973969	rep2			14.07	23.09	1.45151	rep2			21.45	26.08	0.963899	rep2			21.45	24.35	1.17911	rep2
	14.32	26.97	0.859725	rep3			13.51	23.2	0.912285	rep3			20.25	24.97	0.905605	rep3			20.25	23.45	0.957734	rep3
0.5 min	14	26.28	1.11107	rep1		0.5 min	13.41	22.88	1.06257	rep1		0.5 min	21.28	26.76	0.534757	rep1		0.5 min	21.28	22.69	3.31199	rep1
	14.2	25.78	1.80494	rep2			13.29	22.7	1.10769	rep2			21.39	24.81	2.22986	rep2			21.39	22.62	3.7521	rep2
	14.14	26.17	1.32129	rep3			13.48	23.12	0.944457	rep3			20.7	24.45	1.77394	rep3			20.7	23.28	1.47192	rep3
1 min	13.9	26.25	1.05845	rep1		1 min	13.46	23.2	0.88121	rep1		1 min	20.35	25.85	0.527395	rep1		1 min	20.35	23.31	1.13108	rep1
	14.1	26.93	0.758882	rep2			14.01	24.08	0.701034	rep2			21.02	25.6	0.997891	rep2			21.02	23.37	1.72632	rep2
	13.75	26.37	0.87779	rep3			13.19	22.95	0.869078	rep3			21.22	25.04	1.68992	rep3			21.22	23.31	2.06723	rep3
1.5 min	14.06	28.09	0.330322	rep1		1.5 min	13.38	23.18	0.845313	rep1		1.5 min	19.73	23.74	1.48139	rep1		1.5 min	19.73	22.65	1.16288	rep1
	14.26	27.32	0.647049	rep2			14.07	23.44	1.13883	rep2			19.82	23.83	1.48139	rep2			19.82	22.4	1.47192	rep2
	13.96	27.26	0.547886	rep3			13.26	23.39	0.672477	rep3			20.66	23.79	2.72632	rep3			20.66	22.61	2.27789	rep3
2 min	13.97	27.19	0.579125	rep1		2 min	13.48	24.04	0.499154	rep1		2 min	20.06	23.41	2.34072	rep1		2 min	20.06	21.31	3.70044	rep1
	13.7	27.12	0.504158	rep2			12.85	23.38	0.509642	rep2			21.54	24.5	3.06727	rep2			21.54	22.62	4.16321	rep2
	14.42	27.84	0.504158	rep3			14.16	24.54	0.565484	rep3			19.15	21.4	5.01745	rep3			19.15	20.46	3.5497	rep3
2.5 min	15.38	27.53	1.21583	rep1		2.5 min	15.27	24.22	1.52368	rep1		2.5 min	20.25	22.75	4.21916	rep1		2.5 min	20.25	21.06	5.02003	rep1
	14.22	27.07	0.748434	rep2			13.82	23.76	0.767137	rep2			20.51	22.25	7.1451	rep2			20.51	21.28	5.16116	rep2
	13.97	27.19	0.579125	rep3			13.08	23.48	0.557698	rep3			20.59	22.94	4.68145	rep3			20.59	21.93	3.47665	rep3
3 min	14.39	27.02	0.871726	rep1		3 min	14.32	24.26	0.767137	rep1		3 min	19.87	21.56	7.39707	rep1		3 min	19.87	20.09	7.55639	rep1
	15	28.05	0.65155	rep2			14.76	24.92	0.658638	rep2			20.62	21.82	10.3888	rep2			20.62	20.76	7.98724	rep2
	14.4	27.14	0.807731	rep3			13.71	24.03	0.589497	rep3			19.05	20.1	11.5271	rep3			19.05	19.21	7.87727	rep3
4 min	13.98	26.54	0.915066	rep1		4 min	13.26	22.97	0.899726	rep1		4 min	20.31	20.71	18.0879	rep1		4 min	20.31	20.18	9.63107	rep1
	15.07	27.46	1.0295	rep2			14.57	24.45	0.799715	rep2			19.54	19.98	17.5933	rep2			19.54	19.19	11.2176	rep2
	14.12	27.24	0.620691	rep3			13.85	23.88	0.720743	rep3			18.73	19.26	16.5293	rep3			18.73	18.7	8.98611	rep3
5 min	14.49	26.04	1.84286	rep1		5 min	14.25	23.02	1.72615	rep1		5 min	20.43	20.6	21.2141	rep1		5 min	20.43	19.6	15.6457	rep1
	14.52	26.68	1.20744	rep2			14.09	23.26	1.30818	rep2			19.63	20.18	16.3017	rep2			19.63	19.18	12.0228	rep2
	15.01	25.86	2.99374	rep3			13.78	22.12	2.32553	rep3			19.4	19.78	18.3404	rep3			19.4	19.07	11.0632	rep3
6 min	14.49	25.83	2.13162	rep1		6 min	14.21	22.5	2.40754	rep1		6 min	19.03	19.25	20.4915	rep1		6 min	19.03	18.36	14.0033	rep1
	13.88	25.06	2.38163	rep2			13.1	21.65	2.0105	rep2			19.47	19.44	24.3687	rep2			19.47	18.64	15.6457	rep2
	14.54	25.4	2.97306	rep3			13.93	22.26	2.3417	rep3			18.55	18.93	18.3404	rep3			18.55	17.67	16.1975	rep3
7 min	13.83	25.25	2.01663	rep1		7 min	13.8	21.88	2.78477	rep1		7 min	18.41	18.81	18.0879	rep1		7 min	18.41	17.14	21.2251	rep1
	14.11	25.19	2.55256	rep2			13.31	21.38	2.80414	rep2			19.19	18.99	27.4162	rep2			19.19	17.53	27.8132	rep2
	13.86	24.81	2.79325	rep3			13.18	21.64	2.13992	rep3			18.85	19.15	19.3862	rep3			18.85	17.81	18.0972	rep3
8 min	13.78	23.88	5.03484	rep1		8 min	13	20.35	4.61892	rep1		8 min	18.83	18.73	25.5802	rep1		8 min	18.83	17.94	16.3101	rep1
	14.04	24.07	5.28516	rep2			13.36	20.9	4.04898	rep2			19.79	19.58	27.6069	rep2			19.79	18.13	27.8132	rep2
	14.17	24.23	5.17639	rep3			13.32	20.51	5.16067	rep3			20.26	19.86	31.4929	rep3			20.26	18.73	25.4166	rep3
9 min	14.98	24.51	7.47434	rep1		9 min	13.48	19.92	8.67917	rep1		9 min	19.41	19.33	25.228	rep1		9 min	19.41	17.61	30.6475	rep1
	14.39	24.22	6.07105	rep2			13.65	20.41	6.95262	rep2			20.31	20.43	21.9623	rep2			20.31	18.59	28.9943	rep2
	15.52	25.43	5.74357	rep3			13.79	20.48	7.29828	rep3			20.02	19.6	31.9325	rep3			20.02	18.24	30.2255	rep3
10 min	14.14	23.12	10.9431	rep1		10 min	14.08	19.97	12.707	rep1		10 min	20.07	19.6	33.0586	rep1		10 min	20.07	18.24	31.2914	rep1
	16.06	25.77	6.59763	rep2			13.9	20.15	9.90088	rep2			20.05	19.58	33.0586	rep2			20.05	17.92	38.5243	rep2
	15.66	24.64	10.9431	rep3			13.63	18.67	22.9045	rep3			18.03	17.54	33.5201	rep3			18.03	15.69	44.5606	rep3
Fig. 4c
RT-qPCR
LHCSR3.1	Ct number					LHCSR3.2	Ct number					PtLHCX2	Ct number					PtLHCX3	Ct number
	RACK1	LHCSR3.1	fold change				RACK1	LHCSR3.2	fold change				RPS	LHCX2	fold change				RPS	LHCX3	fold change
CL-control (defined as 1)	12.43	25.32	1.12191	rep1		CL-control (defined as 1)	12.43	21.54	1.0869	rep1		control (defined as 1)	17.55	22.94	0.853707	rep1		control (defined as 1)	17.55	21.11	1.15525	rep1
	12.14	25.05	1.10647	rep2			12.14	21.39	0.986379	rep2			17.47	22.52	1.08058	rep2			17.47	21.16	1.0557	rep2
	12	25.43	0.771619	rep3			12	21.34	0.926725	rep3			17.6	22.67	1.06571	rep3			17.6	21.71	0.789056	rep3
CL 30min	11.88	17.47	176.798	rep1		CL 30min	11.88	14.15	124.518	rep1		CL 30min	17.09	16.94	39.7205	rep1		CL 30min	17.09	15.43	43.0577	rep1
	12.61	18.59	134.92	rep2			12.61	15.43	85.0485	rep2			16.97	17.01	34.8192	rep2			16.97	14.9	57.2101	rep2
	12.27	17.22	275.51	rep3			12.27	14.34	143.034	rep3			16.71	16.02	57.7525	rep3			16.71	14.68	55.6457	rep3
CL 1h	12.62	17.56	277.426	rep1		CL 1h	12.62	14.47	166.596	rep1		CL 1h	16.69	15.98	58.5587	rep1		CL 1h	16.69	15.6	29.0044	rep1
	12.13	17.64	186.879	rep2			12.13	14.44	121.113	rep2			17.02	15.72	88.1453	rep2			17.02	16.1	25.7803	rep2
	12.74	17.74	266.125	rep3			12.74	14.38	192.7	rep3			17.4	16.35	74.1211	rep3			17.4	16.52	25.0754	rep3
CL 2h	11.74	17.67	139.678	rep1		CL 2h	11.74	14.29	102.552	rep1		CL 2h	18.03	16.73	88.1453	rep1		CL 2h	18.03	18.88	7.55902	rep1
	12.07	17.86	153.912	rep2			12.07	14.69	97.6951	rep2			17.36	16.52	64.0805	rep2			17.36	19.03	4.28175	rep2
	12.03	17.51	190.806	rep3			12.03	14.18	135.318	rep3			17.74	16.96	61.4701	rep3			17.74	19.43	4.2228	rep3
FL-control (defined as 1)	12.65	23.96	1.39626	rep1		FL-control (defined as 1)	12.65	20.55	1.46312	rep1		FL 55min (HL 30min)	18.03	17.02	72.0943	rep1		FL 55min (HL 30min)	18.03	15.74	66.6346	rep1
	12.58	24.47	0.934048	rep2			12.58	21.21	0.882119	rep2			17.29	17	43.7682	rep2			17.29	14.33	106.02	rep2
	12.53	24.9	0.669691	rep3			12.53	21.59	0.654763	rep3			17.21	16.64	53.1432	rep3			17.21	14.95	65.2633	rep3
FL 55min (HL 30min)	12.12	20.25	12.6544	rep1		FL 55min (HL 30min)	12.12	16.59	15.7693	rep1		FL 1h 55min (HL1h)	16.48	16.61	32.7135	rep1		FL 1h 55min (HL1h)	16.48	15.6	25.0754	rep1
	12.32	19.76	20.4152	rep2			12.32	16.24	23.0876	rep2			16.38	16.05	44.9987	rep2			16.38	15.17	31.5201	rep2
	12.45	20.75	11.2478	rep3			12.45	16.73	17.989	rep3			16.89	16.26	55.3999	rep3			16.89	15.81	28.804	rep3
FL 1h 55min (HL1h)	11.77	21.34	4.664	rep1		FL 1h 55min (HL1h)	11.77	17.86	5.13031	rep1		FL 3h55min (HL2h)	17.49	18.5	17.7754	rep1		FL 3h55min (HL 2h)	17.49	19.27	3.96741	rep1
	12.51	21.93	5.17503	rep2			12.51	18.29	6.36008	rep2			17.67	18.37	22.0363	rep2			17.67	18.91	5.76851	rep2
	12.49	20.73	11.7254	rep3			12.49	17.37	11.8683	rep3			17.45	17.71	29.8946	rep3			17.45	19.08	4.40212	rep3
FL 3h55min (HL2h)	12.05	18.79	33.1645	rep1		FL 3h55min (HL2h)	12.05	15.53	31.3207	rep1
	12.26	19.09	31.1588	rep2			12.26	16.14	23.7367	rep2
	12.37	19.19	31.3755	rep3			12.37	15.38	43.3826	rep3
Fig. 4d
Proteomincs data
LHCSR3		rep1	rep2			PtLHCX2	rep1	rep2				PtLHCX3	rep1	rep2
WT-CL / WT-NL		7.94097	7.80839			WT-CL / WT-NL	4.78918	5.5077				WT-CL / WT-NL	1.37283	1.26382
WT-FL / WT-NL		4.27907	4.63394			WT-FL / WT-NL	4.53451	5.78491				WT-FL / WT-NL	1.38894	1.49782
						aureo1c-1-CL / WT-NL	0.370336	0.429671				aureo1c-1-CL / WT-NL	1.07313	1.00339
						aureo1c-1-FL / WT-NL	0.324627	0.198152				aureo1c-1-FL / WT-NL	1.19435	1.08463
Fig. 4e
NPQ
C. reinhardtii								P. tricornutum
Time (min)	CL-rep1	CL-rep2	CL-rep3	FL-rep1	FL-rep2	FL-rep3		Time (min)	CL-rep1	CL-rep2	CL-rep3	FL-rep1	FL-rep2	FL-rep3
0	0	0	0	0	0	0		0	0	0	0	0	0	0
0.5	0.888	0.855	1.173	0.445	0.421	0.467		0.5	0.255	0.234	0.366	0.17	0.327	0.335
1	0.864	0.864	1.092	0.412	0.408	0.418		1	0.697	0.676	0.865	0.643	0.908	0.837
1.5	0.809	0.802	0.924	0.363	0.359	0.33		1.5	0.902	0.881	1.061	0.937	1.187	1.127
2	0.725	0.704	0.725	0.306	0.312	0.269		2	1.012	0.992	1.15	1.12	1.31	1.287
2.5	0.641	0.604	0.598	0.26	0.27	0.222		2.5	1.081	1.069	1.189	1.275	1.399	1.401
3	0.589	0.529	0.53	0.228	0.237	0.203		3	1.135	1.133	1.207	1.373	1.474	1.523
3.5	0.54	0.488	0.503	0.214	0.227	0.208		3.5	1.182	1.158	1.225	1.45	1.534	1.574
4	0.534	0.473	0.534	0.215	0.226	0.237		4	1.201	1.195	1.248	1.514	1.559	1.603
4.5	0.527	0.461	0.547	0.224	0.227	0.252		4.5	1.217	1.202	1.265	1.55	1.571	1.616
5	0.541	0.457	0.595	0.241	0.241	0.277		5	1.24	1.21	1.283	1.583	1.586	1.648
5.5	0.558	0.463	0.621	0.261	0.257	0.319		5.5	1.252	1.234	1.301	1.592	1.595	1.656
6	0.572	0.474	0.611	0.283	0.26	0.343		6	1.257	1.24	1.305	1.613	1.611	1.674
6.5	0.58	0.485	0.644	0.302	0.268	0.354		6.5	1.27	1.252	1.319	1.619	1.614	1.68
7	0.579	0.483	0.643	0.315	0.27	0.359		7	1.283	1.268	1.329	1.638	1.638	1.693
7.5	0.562	0.486	0.628	0.324	0.265	0.348		7.5	1.291	1.272	1.338	1.648	1.645	1.709
8	0.548	0.477	0.613	0.322	0.254	0.326		8	1.3	1.289	1.343	1.644	1.649	1.704
8.5	0.52	0.466	0.611	0.32	0.245	0.31		8.5	1.309	1.29	1.355	1.654	1.662	1.714
9	0.501	0.461	0.62	0.325	0.271	0.308		9	1.316	1.298	1.37	1.647	1.659	1.71
9.5	0.477	0.456	0.618	0.361	0.31	0.304		9.5	1.311	1.306	1.385	1.668	1.661	1.725
10	0.495	0.467	0.666	0.397	0.337	0.327		10	1.337	1.304	1.388	1.664	1.686	1.718
11	0.1	0.189	0.141	0.187	0.107	0.091		11	1.345	1.299	1.306	1.524	1.563	1.617
12	0.283	0.387	0.358	0.256	0.191	0.193		12	1.124	1.055	0.919	0.697	0.675	0.714
13	0.294	0.377	0.368	0.247	0.189	0.234		13	0.658	0.562	0.477	0.114	0.132	0.135
14	0.263	0.324	0.35	0.245	0.194	0.279		14	0.246	0.186	0.195	0	0.057	0.052
15	0.257	0.295	0.382	0.273	0.224	0.335		15	0.064	0.041	0.064	0	0.043	0.031
16	0.267	0.282	0.406	0.315	0.259	0.411		16	0.003	0	0.014	0	0.029	0.027
17	0.291	0.289	0.475	0.343	0.299	0.472		17	0	0	0	0	0.022	0.022
18	0.309	0.286	0.515	0.379	0.328	0.499		18	0	0	0	0	0.021	0.015
19	0.327	0.304	0.568	0.409	0.354	0.55		19	0	0	0	0	0.014	0.012
20	0.343	0.319	0.613	0.429	0.368	0.571		20	0	0	0	0	0.009	0.011

## Sheet: Fig. S3
Supplementary Fig. 3b
NPQ
WT					lhcx2-2 lhcx3-3					lhcx2-2 lhcx3-4
Time (min)	rep1	rep2	rep3		Time (min)	rep1	rep2	rep3		Time (min)	rep1	rep2	rep3
0	0	0	0		0	0	0	0		0	0	0	0
0.5	0.478	0.536	0.592		0.5	0.028	0.086	0.103		0.5	0.385	0.37	0.338
1	1.216	1.245	1.363		1	0.146	0.257	0.278		1	0.729	0.592	0.633
1.5	1.459	1.491	1.614		1.5	0.276	0.382	0.414		1.5	0.998	0.646	0.751
2	1.634	1.581	1.619		2	0.382	0.509	0.537		2	1.032	0.765	0.86
2.5	1.695	1.668	1.782		2.5	0.501	0.609	0.634		2.5	1.16	0.834	0.889
3	1.772	1.746	1.76		3	0.635	0.787	0.73		3	1.185	0.869	0.974
3.5	1.738	1.759	1.817		3.5	0.778	0.914	0.849		3.5	1.339	0.938	1.059
4	1.867	1.87	1.88		4	0.855	1.01	0.895		4	1.388	0.99	1.053
4.5	1.8	1.854	1.935		4.5	0.894	1.052	0.944		4.5	1.393	1.003	1.089
5	1.841	1.781	1.948		5	0.943	1.084	0.955		5	1.393	1.016	1.1
5.5	1.921	1.834	1.933		5.5	0.918	1.113	0.986		5.5	1.47	1.055	1.109
6	1.879	1.823	1.915		6	0.963	1.145	1.052		6	1.47	1.044	1.086
6.5	1.937	1.807	1.999		6.5	0.98	1.138	1.036		6.5	1.422	1.091	1.194
7	1.924	1.856	1.939		7	0.967	1.147	1.057		7	1.408	1.021	1.082
7.5	1.946	1.869	2.034		7.5	1.017	1.159	1.058		7.5	1.521	1.074	1.172
8	1.946	1.922	1.982		8	1.033	1.186	1.088		8	1.451	1.01	1.173
8.5	1.899	2.011	1.994		8.5	1.061	1.177	1.028		8.5	1.415	1.076	1.128
9	2.027	1.881	1.943		9	1.041	1.178	1.097		9	1.489	1.077	1.127
9.5	2.017	1.868	2.022		9.5	1.045	1.178	1.079		9.5	1.465	1.117	1.095
10	1.947	1.917	1.972		10	1.023	1.195	1.113		10	1.573	1.074	1.172
11	1.756	1.818	1.797		11	0.828	1.038	0.916		11	1.515	1.083	1.134
12	0.99	1.008	0.863		12	0.481	0.553	0.484		12	1.224	0.837	0.809
13	0.325	0.316	0.26		13	0.11	0.145	0.092		13	0.618	0.47	0.393
14	0.073	0.091	0.089		14	0	0	0		14	0.168	0.172	0.096
15	0.019	0	0.013		15	0	0	0		15	0	0	0
16	0	0	0.011		16	0	0	0		16	0	0	0
17	0	0	0.006		17	0	0	0		17	0	0	0
18	0	0	0		18	0	0	0		18	0	0	0
19	0	0	0		19	0	0	0		19	0	0	0
20	0	0	0		20	0	0	0		20	0	0	0

## Sheet: Fig. S7
Supplementary Fig. 7a
Cell concentration (×106 cell/mL)
	rep1	rep2	rep3
WT	8.42893	8.26295	8.85164
aureo1c-1	1.87144	2.75353	2.91332
COMP	9.17192	7.97378	7.87636

## Sheet: Fig. S9
Supplementary Fig. 9
NPQ
WT					aureo1c-1					COMP
Time (min)	rep1	rep2	rep3		Time (min)	rep1	rep2	rep3		Time (min)	rep1	rep2	rep3
0	0	0	0		0	0	0	0		0	0	0	0
0.5	0.383	0.409	0.391		0.5	0.156	0.233	0.249		0.5	0.577	0.76	0.602
1	0.792	0.842	0.847		1	0.195	0.26	0.269		1	1.236	1.536	1.212
1.5	1.015	1.103	1.081		1.5	0.219	0.272	0.288		1.5	1.585	1.88	1.486
2	1.178	1.213	1.194		2	0.227	0.287	0.301		2	1.835	2.027	1.677
2.5	1.356	1.347	1.324		2.5	0.234	0.296	0.304		2.5	2.013	2.146	1.784
3	1.513	1.454	1.429		3	0.233	0.302	0.324		3	2.163	2.217	1.911
3.5	1.611	1.515	1.485		3.5	0.237	0.298	0.323		3.5	2.249	2.259	1.973
4	1.658	1.552	1.516		4	0.243	0.296	0.322		4	2.297	2.256	1.998
4.5	1.685	1.566	1.532		4.5	0.234	0.305	0.327		4.5	2.349	2.31	2.019
5	1.71	1.592	1.547		5	0.238	0.312	0.323		5	2.375	2.323	2.013
5.5	1.767	1.602	1.566		5.5	0.234	0.311	0.328		5.5	2.402	2.356	2.06
6	1.774	1.626	1.577		6	0.239	0.303	0.318		6	2.436	2.345	2.067
6.5	1.788	1.629	1.603		6.5	0.239	0.306	0.336		6.5	2.429	2.365	2.076
7	1.806	1.649	1.602		7	0.235	0.309	0.321		7	2.462	2.393	2.099
7.5	1.813	1.65	1.611		7.5	0.238	0.319	0.332		7.5	2.471	2.368	2.125
8	1.804	1.678	1.649		8	0.237	0.316	0.331		8	2.487	2.412	2.108
8.5	1.831	1.674	1.645		8.5	0.24	0.325	0.337		8.5	2.502	2.424	2.123
9	1.845	1.683	1.669		9	0.236	0.318	0.339		9	2.501	2.446	2.152
9.5	1.834	1.7	1.671		9.5	0.239	0.311	0.348		9.5	2.505	2.431	2.144
10	1.852	1.701	1.675		10	0.241	0.318	0.344		10	2.562	2.459	2.171
11	1.822	1.65	1.642		11	0.177	0.187	0.218		11	2.376	2.227	2.067
12	1.621	1.513	1.421		12	0.167	0.189	0.203		12	2.199	2.087	1.887
13	1.336	1.239	1.103		13	0.162	0.181	0.204		13	1.884	1.775	1.628
14	0.989	0.926	0.733		14	0.147	0.17	0.195		14	1.453	1.388	1.261
15	0.688	0.65	0.456		15	0.132	0.167	0.194		15	1.016	0.992	0.88
16	0.471	0.443	0.297		16	0.125	0.163	0.179		16	0.692	0.67	0.592
17	0.331	0.307	0.19		17	0.111	0.154	0.173		17	0.483	0.487	0.412
18	0.244	0.209	0.145		18	0.107	0.157	0.174		18	0.352	0.359	0.291
19	0.185	0.16	0.098		19	0.094	0.144	0.162		19	0.276	0.274	0.215
20	0.138	0.119	0.066		20	0.075	0.137	0.161		20	0.223	0.228	0.168

## Sheet: Fig. S10
Supplementary Fig. 10
RT-qPCR
LHCX1	Ct number						LHCX1	Ct number
	RPS	LHCX1	fold change					RPS	LHCX1	fold change
WT-GL (defined as 1)	18.85	28.22	0.805794	rep1			WT-GL (defined as 1)	17.13	25.21	0.996767	rep1
	18.67	27.62	1.07809	rep2				17.16	25.54	0.809626	rep2
	18.46	27.36	1.11611	rep3				17.21	25.03	1.19361	rep3
aureo1a-1-GL	18.97	25.06	7.82713	rep1			aureo1a-1-GL	16.5	21.27	9.8856	rep1
	19	24.87	9.11652	rep2				16.68	22.08	6.38784	rep2
	18.76	25.09	6.62758	rep3				16.59	21.56	8.60591	rep3
aureo1b-1-GL	18.05	26.15	1.94326	rep1			aureo1a-2-GL	18.23	26.58	0.826638	rep1
	18.52	26.05	2.88482	rep2				17.07	25.18	0.976254	rep2
	18.71	26.6	2.24775	rep3				17.35	25.83	0.755408	rep3
aureo1c-1-GL	18.85	28.28	0.772969	rep1			aureo1a-3-GL	17.9	25.38	1.51082	rep1
	18.96	29.31	0.408521	rep2				17.18	26.59	0.396482	rep2
	18.64	28.33	0.645497	rep3				17.27	26.11	0.588587	rep3
COMP-GL	18.34	27.72	0.800228	rep1
	18.15	27.21	0.998949	rep2
	18.51	27.88	0.805794	rep3
WT-HL	18.15	27.11	1.07065	rep1
	18.2	27.1	1.11611	rep2
	18.11	27	1.12388	rep3
aureo1a-1-HL	17.94	25.82	2.26339	rep1
	18.28	25.75	3.00733	rep2
	18.2	25.66	3.02825	rep3
aureo1b-1-HL	18.44	27.18	1.24702	rep1
	17.89	26.92	1.01994	rep2
	18.15	26.55	1.57842	rep3
aureo1c-1-HL	19.04	27.74	1.28208	rep1
	18.64	27.61	1.06325	rep2
	19.35	28.42	0.992048	rep3
COMP-HL	18	27.26	0.869635	rep1
	17.99	28.06	0.496024	rep2
	18.05	27.31	0.869635	rep3
LHCX4	Ct number
	RPS	LHCX4	fold change
WT-GL (defined as 1)	15.67	20.5	1.1353	rep1
	15.97	20.78	1.15115	rep2
	15.59	21.09	0.713546	rep3
aureo1a-1-GL	15.83	20.3	1.45708	rep1
	15.87	21.05	0.890741	rep2
	15.45	20.74	0.82535	rep3
aureo1b-1-GL	16.45	21.39	1.05196	rep1
	15.83	21.03	0.878478	rep2
	15.46	21.23	0.591757	rep3
aureo1c-1-GL	15.97	21.18	0.87241	rep1
	16.12	21.36	0.854456	rep2
	16.15	22.01	0.555969	rep3
COMP-GL	16.11	20.84	1.21679	rep1
	16.11	21.08	1.03031	rep2
	16.22	21.04	1.1432	rep3
WT-HL	15.96	21.42	0.733606	rep1
	15.12	21.14	0.497607	rep2
	15.52	21.56	0.490756	rep3
aureo1a-1-HL	16.01	21.27	0.842692	rep1
	15.11	21.27	0.451588	rep2
	15.45	21.32	0.552129	rep3
aureo1b-1-HL	16.01	21.6	0.670392	rep1
	15.93	21.54	0.661163	rep2
	15.9	21.77	0.552129	rep3
aureo1c-1-HL	15.63	21.72	0.474039	rep1
	15.23	21.04	0.575576	rep2
	15.79	21.87	0.477336	rep3
COMP-HL	15.02	21.02	0.504553	rep1
	15.77	21.6	0.567652	rep2
	15.91	21.99	0.477336	rep3

## Sheet: Fig. S11
Supplementary Fig. 11b
Western blot
raw image:								annotated:

## Sheet: Fig. S12
Supplementary Fig. 12
RT-qPCR
LHCX2							LHCX3
light intensity (μmol photons m-2 s-1)	Ct number						light intensity (μmol photons m-2 s-1)	Ct number
	RPS	LHCX2	fold change	average	stdev			RPS	LHCX3	fold change	average	stdev
WT-40 (defined as 1)	16.09	21.38	1.08442	1	0.080284		WT-40 (defined as 1)	16.09	20.16	1.15532	1	0.134852
	15.88	21.3	0.990973					15.88	20.29	0.912751
	16.12	21.64	0.924611					16.12	20.5	0.931929
aureo1c-1-40	16.4	21.8	1.00481	1.3589	0.318243		aureo1c-1-40	16.4	20.96	0.822617	1.24878	0.422832
	16.69	21.4	1.62104					16.69	20.23	1.6682
	16.78	21.65	1.45087					16.78	20.73	1.25553
WT-80	16.09	20.43	2.09495	2.28326	0.351432		WT-80	16.09	19.41	1.94301	2.76814	0.932466
	16.14	20.12	2.68872					16.14	18.5	3.77975
	16.02	20.38	2.06611					16.02	18.93	2.58165
aureo1c-1-80	16.08	20.65	1.78623	1.47394	0.316071		aureo1c-1-80	16.08	19.78	1.49308	1.35756	0.184579
	16	21.2	1.15422					16	20.08	1.14734
	16.26	21.1	1.48136					16.26	20.02	1.43226
WT-160	16.3	18.88	7.09557	5.11578	1.76703		WT-160	16.3	17.78	6.95617	7.53925	0.573226
	15.56	19.08	3.69844					15.56	16.92	7.55951
	16.1	19.32	4.55332					16.1	17.36	8.10208
aureo1c-1-160	17.01	21.3	2.16883	2.0573	0.180358		aureo1c-1-160	17.01	19.82	2.76694	2.35565	0.365489
	16.89	21.19	2.15385					16.89	20.12	2.06808
	16.48	21	1.84922					16.48	19.6	2.23193
WT-320	15.79	17.28	15.1046	17.5484	2.48323		WT-320	15.79	15	33.5512	36.6795	5.01818
	15.75	16.83	20.0693					15.75	14.94	34.0196
	15.8	17.08	17.4713					15.8	14.67	42.4677
aureo1c-1-320	16.18	20.2	2.61519	2.16806	0.49035		aureo1c-1-320	16.18	18.9	2.94505	2.72105	0.424086
	16.12	20.81	1.64367					16.12	19.24	2.23193
	16.54	20.78	2.24532					16.54	19.24	2.98616
WT-640	16.01	15.14	77.5426	54.2473	20.5344		WT-640	16.01	13.36	121.793	122.331	17.3107
	16	15.87	46.4278					16	13.15	139.904
	15.77	15.9	38.7713					15.77	13.33	105.295
aureo1c-1-640	17.06	21.24	2.34066	2.05302	0.259513		aureo1c-1-640	17.06	19.43	3.75365	2.98495	0.6696
	16.27	20.8	1.83645					16.27	19.13	2.67269
	16.01	20.43	1.98195					16.01	18.95	2.52852
LHCX2							LHCX3
light intensity (μmol photons m-2 s-1)	WT/ aureo1c-1						light intensity (μmol photons m-2 s-1)	WT/ aureo1c-1
40	0.736						40	0.801
80	1.549						80	2.039
160	2.487						160	3.2
320	8.094						320	13.48
640	26.42						640	40.98

## Sheet: Fig. S13
Supplementary Fig. 13
RT-qPCR
LHCX2		Ct number					LHCX3		Ct number
		RPS	LHCX2	fold change					RPS	LHCX3	fold change
GL (defined as 1)	WT	18.27	24.43	1.17308	rep1		GL (defined as 1)	WT	18.25	22.3	0.770722	rep1
		18.59	24.83	1.1098	rep2				18.15	21.18	1.56296	rep2
		18.72	25.59	0.717125	rep3				18.29	22.55	0.666318	rep3
	aureo1c-1	18.91	25.06	1.18124	rep1			aureo1c-1	18.57	22.5	0.83757	rep1
		19.6	25.25	1.67052	rep2				19.37	23.4	0.78148	rep2
		18.6	24.55	1.35688	rep3				18.42	22.28	0.879211	rep3
	COMP	19.07	24.32	2.20426	rep1			COMP	18.96	23.61	0.508487	rep1
		18.71	25.23	0.91402	rep2				19.04	23.05	0.79239	rep2
		19.26	25.14	1.42434	rep3				18.95	23.34	0.608902	rep3
GL to HL 10min	WT	17.85	18.63	48.8504	rep1		GL to HL 10min	WT	17.46	15.2	61.15	rep1
		17.92	19.45	29.0466	rep2				18.04	16.15	47.3168	rep2
		18.61	19.89	34.5424	rep3				17.89	16.68	29.5335	rep3
	aureo1c-1	17.9	24.22	1.04993	rep1			aureo1c-1	18.41	20.03	4.15337	rep1
		18.28	24.06	1.52657	rep2				18.06	20.1	3.10433	rep2
		19.3	24.31	2.60322	rep3				19.33	20.62	5.22084	rep3
	COMP	19	19.96	43.1204	rep1			COMP	18.25	16.54	41.7667	rep1
		19.41	20.27	46.2153	rep2				19.01	17.22	44.1482	rep2
		18.92	19.9	42.5267	rep3				18.6	17.06	37.124	rep3
Dark	WT	22.36	30.78	0.244906	rep1		Dark	WT	22.19	25.75	1.08244	rep1
		21.55	29.32	0.384298	rep2				21.37	25.36	0.803451	rep2
		23.09	30.21	0.603028	rep3				22.88	25.33	2.33639	rep3
	aureo1c-1	21.72	29.19	0.473126	rep1			aureo1c-1	22.02	25.46	1.17632	rep1
		22.08	28.31	1.11752	rep2				21.8	25.58	0.929342	rep2
		22.99	29.57	0.876786	rep3				22.53	25.63	1.48894	rep3
	COMP	23.1	29.82	0.7957	rep1			COMP	22.43	25.34	1.69852	rep1
		21.93	29.76	0.368643	rep2				21.4	25.22	0.903929	rep2
		22.18	29.69	0.460189	rep3				21.77	25.18	1.20104	rep3
Dark to GL 10min	WT	21.52	23.67	18.8998	rep1		Dark to GL 10min	WT	21.01	20.05	24.8346	rep1
		21.31	24.05	12.5559	rep2				20.95	19.67	31.0018	rep2
		21.34	24.67	8.34144	rep3				21.55	20.57	25.1813	rep3
	aureo1c-1	21.12	25.71	3.48292	rep1			aureo1c-1	20.92	20.84	13.4943	rep1
		20.34	24.49	4.72494	rep2				20.65	20.55	13.6827	rep2
		21.11	25.92	2.99031	rep3				21.26	21.36	11.9115	rep3
	COMP	20.97	21.66	51.9949	rep1			COMP	21.03	18.67	65.539	rep1
		24.01	25.24	35.7606	rep2				24.06	20.99	107.209	rep2
		21.54	22.22	52.3565	rep3				21.53	19.37	57.055	rep3
Dark to HL 10min	WT	19.87	19.63	99.0646	rep1		Dark to HL 10min	WT	19.86	16.67	116.508	rep1
		19.65	20.05	63.571	rep2				19.57	16.92	80.1306	rep2
		19.98	19.66	104.713	rep3				19.7	17.1	77.4011	rep3
	aureo1c-1	20.72	24.07	8.22661	rep1			aureo1c-1	20.44	19.48	24.8346	rep1
		21.2	24.53	8.34144	rep2				21.02	19.84	28.9257	rep2
		20.26	23.94	6.54456	rep3				20.18	19.41	21.7702	rep3
	COMP	20.5	19.81	135.326	rep1			COMP	20.01	17.16	92.0459	rep1
		20.2	19.45	141.073	rep2				19.98	16.84	112.539	rep2
		20.03	19.33	136.267	rep3				19.75	16.84	95.9547	rep3

[truncated: 7 more sheets: Fig. S14, Fig. S16, Fig. S17, Fig. S18, Fig. S19, Fig. S20, Fig. S21]
